# Supplementary material
Source: publisher site journal article supplement (doi:10.18632/aging.203210)
Supplement: Supplementary file 1 [file aging-v13-203210-supplementary-material-SD1.xlsx]

## Sheet: DiffContigsInfos
Supplementary Table 1. DiffContigsInfos.
tag	nb_merged_kmers	contig	contig_size	pvalue	meanA	meanB	log2FC	is_mapped	line_in_sam	chromosome	start	end	strand	cigar	nb_insertion	nb_deletion	nb_splice	nb_snv	clipped_3p	clipped_5p	is_clipped_3p	is_clipped_5p	query_cover	alignment_identity	nb_hit	nb_mismatch	is_chimeric	chimeric_junctions	gene_id	gene_symbol	gene_strand	gene_biotype	as_gene_id	as_gene_symbol	as_gene_strand	as_gene_biotype	upstream_gene_id	upstream_gene_strand	upstream_gene_symbol	upstream_gene_dist	downstream_gene_id	downstream_gene_strand	downstream_gene_symbol	downstream_gene_dist	exonic	intronic
AAACCACAGGTGCAAATCGAGAGTCTCGAAA	11	CGCGAAACCACAGGTGCAAATCGAGAGTCTCGAAATCCGGC	41	0.0189122141760848	10.622609	1.959	-2.438949	F	NA	NA	NA	NA	NA	NA	NA	NA	NA	NA	NA	NA	NA	NA	NA	NA	NA	NA	F	NA	NA	NA	NA	NA	NA	NA	NA	NA	NA	NA	NA	NA	NA	NA	NA	NA	NA	NA
ACCACCCAGATCTACACCCTATCCTACACTC	1	ACCACCCAGATCTACACCCTATCCTACACTC	31	0	347.834348	2.755667	-6.979855	F	NA	NA	NA	NA	NA	NA	NA	NA	NA	NA	NA	NA	NA	NA	NA	NA	NA	NA	F	NA	NA	NA	NA	NA	NA	NA	NA	NA	NA	NA	NA	NA	NA	NA	NA	NA	NA	NA
GACGGGTCCGATTGGGTACTGAACGGCACCA	3	GACGGGTCCGATTGGGTACTGAACGGCACCAAG	33	0.0326367809724152	1	8.674333	3.116753	F	NA	NA	NA	NA	NA	NA	NA	NA	NA	NA	NA	NA	NA	NA	NA	NA	NA	NA	F	NA	NA	NA	NA	NA	NA	NA	NA	NA	NA	NA	NA	NA	NA	NA	NA	NA	NA	NA
CCCGTTCCAGCGAGTTCACCCTCTAAATCAC	23	AGATTACACATGCAAGCATCCCCGTTCCAGCGAGTTCACCCTCTAAATCACCA	53	0.0253446689018066	1.519565	8.791333	2.532424	T	10764	chrM	686	738	NA	53M	0	0	0	1	0	0	F	F	1	0.981132075471698	1	1	F	NA	ENSG00000211459	MT-RNR1	+	Mt_rRNA	NA	NA	NA	NA	NA	NA	NA	NA	NA	NA	NA	NA	T	F
ATCAGAGGTCAACGATCCTTCATCGTGGGAT	14	CATCAGAGGTCAACGATCCTTCATCGTGGGATCGAGCACGACAC	44	0.0201387241491508	8.129565	1.042	-2.963823	F	NA	NA	NA	NA	NA	NA	NA	NA	NA	NA	NA	NA	NA	NA	NA	NA	NA	NA	F	NA	NA	NA	NA	NA	NA	NA	NA	NA	NA	NA	NA	NA	NA	NA	NA	NA	NA	NA
CCGACGATCTTGTTGGTGGCCTGCCGGTAGA	2	GCCGACGATCTTGTTGGTGGCCTGCCGGTAGA	32	0.048226628723251	7.719565	1	-2.94852	F	NA	NA	NA	NA	NA	NA	NA	NA	NA	NA	NA	NA	NA	NA	NA	NA	NA	NA	F	NA	NA	NA	NA	NA	NA	NA	NA	NA	NA	NA	NA	NA	NA	NA	NA	NA	NA	NA
CGATTTCGTGTTCGGTGAATTTCGGAAATTC	41	GACCTTGACGCCGTCCTTGATGAATTTCCGAAATTCACCGAACACGAAATCGTCGGCCTCGGCGAATGCGG	71	0.0173001774804191	1	9.785	3.290572	F	NA	NA	NA	NA	NA	NA	NA	NA	NA	NA	NA	NA	NA	NA	NA	NA	NA	NA	F	NA	NA	NA	NA	NA	NA	NA	NA	NA	NA	NA	NA	NA	NA	NA	NA	NA	NA	NA
CGATAAGCCGGCCTTAATTCGCAACCGGCAG	9	TCGCGATAAGCCGGCCTTAATTCGCAACCGGCAGGGTGA	39	0.0420540790135507	1	9.791	3.291456	F	NA	NA	NA	NA	NA	NA	NA	NA	NA	NA	NA	NA	NA	NA	NA	NA	NA	NA	F	NA	NA	NA	NA	NA	NA	NA	NA	NA	NA	NA	NA	NA	NA	NA	NA	NA	NA	NA
CCGTGACCGGTTTCACCGCGAATGGCGCCAG	5	CTGGCGCCATTCGCGGTGAAACCGGTCACGGCCAGCGAGGCGGCGCGAT	49	0.0301029908788949	34.77	1	-5.119771	F	NA	NA	NA	NA	NA	NA	NA	NA	NA	NA	NA	NA	NA	NA	NA	NA	NA	NA	F	NA	NA	NA	NA	NA	NA	NA	NA	NA	NA	NA	NA	NA	NA	NA	NA	NA	NA	NA
CTGGTCCATCCGCTTGTGCCAGACGGCAACC	45	TGTACAGCACGAGCTGGTCCATCCGCTTGTGCCAGACGGCAACCGTGCCGCGGCCCTCCATCGGCGCCATGCTCT	75	0.0175257797765166	1	6.41	2.680324	F	NA	NA	NA	NA	NA	NA	NA	NA	NA	NA	NA	NA	NA	NA	NA	NA	NA	NA	F	NA	NA	NA	NA	NA	NA	NA	NA	NA	NA	NA	NA	NA	NA	NA	NA	NA	NA	NA
AGCGTGGCCGGGTCGATCTCGACCACATCGC	65	TGTTGAACGAGCGTGGCCGGGTCGATCTCGACCACATCGCCGAACTGCTGCATCGCGAATACGAAGATGTCGTCGCCGAGCTCGGCAGCGCGATCTTCCGCGATCC	106	0.00955588926508664	28.017826	1.709667	-4.034558	F	NA	NA	NA	NA	NA	NA	NA	NA	NA	NA	NA	NA	NA	NA	NA	NA	NA	NA	F	NA	NA	NA	NA	NA	NA	NA	NA	NA	NA	NA	NA	NA	NA	NA	NA	NA	NA	NA
GTCGTTGCTTAATTCATCCCCACGGAGACTA	31	AGCGACGATGGCAATGGTCTCGAACATGATAGTCTCCGTGGGGATGAATTAAGCAACGACA	61	0.00436579799818016	13.563913	1.585333	-3.096916	F	NA	NA	NA	NA	NA	NA	NA	NA	NA	NA	NA	NA	NA	NA	NA	NA	NA	NA	F	NA	NA	NA	NA	NA	NA	NA	NA	NA	NA	NA	NA	NA	NA	NA	NA	NA	NA	NA
GCCATCTATCGTTTGCGCCCCACATAGCGCC	2	GCCATCTATCGTTTGCGCCCCACATAGCGCCC	32	0.0303136655124233	5.456522	12.831333	1.233617	T	17579	chr15	21514893	21514908	NA	16M16S	0	0	0	0	16	0	T	F	0.5	1	2	0	F	NA	ENSG00000287345	AC183088.3	+	lncRNA	NA	NA	NA	NA	NA	NA	NA	NA	NA	NA	NA	NA	F	T
AGCCCCGTTCCGATTCAATCGGAACGGAATA	3	AGAGCCCCGTTCCGATTCAATCGGAACGGAATA	33	0.0119554276459229	43.778261	1.616	-4.759716	T	4653	chr1	103229232	103229247	NA	6S16M11S	0	0	0	0	11	6	T	T	0.484848484848485	1	1	0	F	NA	NA	NA	NA	NA	NA	NA	NA	NA	ENSG00000060718	-	COL11A1	120361	ENSG00000230759	+	AC095032.2	185631	NA	NA
CTTGCCTTCGTCAACGCGACGCTGAACCACA	20	GCTGCTTCAGCTTGCCTTCGTCAACGCGACGCTGAACCACAATTTCTCGG	50	0.0302558132615645	23.626957	2.069667	-3.512963	F	NA	NA	NA	NA	NA	NA	NA	NA	NA	NA	NA	NA	NA	NA	NA	NA	NA	NA	T	chr11:100256645:-|chr20:61393464:+	NA	NA	NA	NA	NA	NA	NA	NA	NA	NA	NA	NA	NA	NA	NA	NA	NA	NA
ACCAGGCGATGTACCAGGTGGCATTTGCGGT	18	CTCGACCGCAAATGCCACCTGGTACATCGCCTGGTCGTGCGGACCGAC	48	0.0404550728989255	1	17.397667	4.120822	F	NA	NA	NA	NA	NA	NA	NA	NA	NA	NA	NA	NA	NA	NA	NA	NA	NA	NA	F	NA	NA	NA	NA	NA	NA	NA	NA	NA	NA	NA	NA	NA	NA	NA	NA	NA	NA	NA
CTTCAACTATCACACATCAACTGCAACTCCA	33	CCCCCCATGCTTACAAGCAAGTACAGCAATCAACCTTCAACTATCACACATCAACTGCAACTCCAA	66	0.00436579799818016	60.276522	1.411	-5.416806	T	16047	chrM	16188	16253	NA	66M	0	0	0	2	0	0	F	F	1	0.96969696969697	1	2	F	NA	NA	NA	NA	NA	NA	NA	NA	NA	ENSG00000210196	-	MT-TP	166	NA	NA	NA	NA	NA	NA
AGGCGAACGGTTCTCCATCCAATGTCGCGTC	8	GACTGAACGACGCGACATTGGATGGAGAACCGTTCGCCTTT	41	0.0265900666139927	1.304783	8.824	2.757623	F	NA	NA	NA	NA	NA	NA	NA	NA	NA	NA	NA	NA	NA	NA	NA	NA	NA	NA	F	NA	NA	NA	NA	NA	NA	NA	NA	NA	NA	NA	NA	NA	NA	NA	NA	NA	NA	NA
ATCGCGACGCCGGCCGGATACTTCACCTGCC	10	GCTGATCGCGACGCCGGCCGGATACTTCACCTGCCGCTTG	40	0.047399224037091	29.661739	1.234	-4.587189	F	NA	NA	NA	NA	NA	NA	NA	NA	NA	NA	NA	NA	NA	NA	NA	NA	NA	NA	F	NA	NA	NA	NA	NA	NA	NA	NA	NA	NA	NA	NA	NA	NA	NA	NA	NA	NA	NA
CCTTTTCCTCCAACGTCGCCGATCTGGTCCG	18	GTTTGCCAACTCGACCTTTTCCTCCAACGTCGCCGATCTGGTCCGCGC	48	0.0296023537542971	19.97	1.237333	-4.012529	F	NA	NA	NA	NA	NA	NA	NA	NA	NA	NA	NA	NA	NA	NA	NA	NA	NA	NA	F	NA	NA	NA	NA	NA	NA	NA	NA	NA	NA	NA	NA	NA	NA	NA	NA	NA	NA	NA
AAACAATAGTGATTCCGAGAGTAGTGGCGAG	12	CATCTCAGTACCCACAGGAAGAGAAAACAATAGTGATTCCGAGAGTAGTGGCGAGC	56	0.0416928229518443	1	5.576667	2.479403	F	NA	NA	NA	NA	NA	NA	NA	NA	NA	NA	NA	NA	NA	NA	NA	NA	NA	NA	F	NA	NA	NA	NA	NA	NA	NA	NA	NA	NA	NA	NA	NA	NA	NA	NA	NA	NA	NA
CGGCGCCCCCGTCGGATCCGGCAAACAGCGC	12	CGGAAGAATGCGCTGTTTGCCGGATCCGACGGGGGCGCCGAA	42	0.00853017823014356	15.676087	1	-3.970494	F	NA	NA	NA	NA	NA	NA	NA	NA	NA	NA	NA	NA	NA	NA	NA	NA	NA	NA	F	NA	NA	NA	NA	NA	NA	NA	NA	NA	NA	NA	NA	NA	NA	NA	NA	NA	NA	NA
GGAATGGAATCATCATCGAATGGAAGTGAAA	1	GGAATGGAATCATCATCGAATGGAAGTGAAA	31	0.0321516855737471	70.913043	1	-6.147979	T	18712	chr10	41848516	41848546	NA	31M	0	0	0	1	0	0	F	F	1	0.967741935483871	1	1	F	NA	NA	NA	NA	NA	NA	NA	NA	NA	ENSG00000233832	+	AL590623.1	3065409	ENSG00000229485	-	KSR1P1	300763	NA	NA
CCTCTCCGCAGCGCATGCCGATGGCCCTGCG	15	CGACAGCGCAGGGCCATCGGCATGCGCTGCGGAGAGGCGCATATG	45	0.0312586960250701	34.46087	1	-5.106887	F	NA	NA	NA	NA	NA	NA	NA	NA	NA	NA	NA	NA	NA	NA	NA	NA	NA	NA	F	NA	NA	NA	NA	NA	NA	NA	NA	NA	NA	NA	NA	NA	NA	NA	NA	NA	NA	NA
CACTGCCGAGCTTGCTCGCGCTGCAGGCGCA	52	CCCTTGCCGATCCGTGCAAGATCGTTTCGCACAACGACCTCTGCGCCTGCAGCGCGAGCAAGCTCGGCAGTGTCGTCGGTGC	82	0.0272355436241611	1	7.561333	2.918641	F	NA	NA	NA	NA	NA	NA	NA	NA	NA	NA	NA	NA	NA	NA	NA	NA	NA	NA	F	NA	NA	NA	NA	NA	NA	NA	NA	NA	NA	NA	NA	NA	NA	NA	NA	NA	NA	NA
CCTCAATGTTCTGCTGCGCAAGGTATTCGAC	57	CTGCGCCTATGCGCGAGGGTTCGTCGAATACCTTGCGCAGCAGAACATTGAGGTCACGGATGTGACCGAGGCGCAGGTGGCTCAGTACCT	90	0.00690094108535708	46.822609	2.149667	-4.44502	F	NA	NA	NA	NA	NA	NA	NA	NA	NA	NA	NA	NA	NA	NA	NA	NA	NA	NA	F	NA	NA	NA	NA	NA	NA	NA	NA	NA	NA	NA	NA	NA	NA	NA	NA	NA	NA	NA
AGGATCGGAAGCTGTCGCCAGGCGACGACCG	3	GCCGGTCGTCGCCTGGCGACAGCTTCCGATCCT	33	0.028965030231571	20.525652	3.037333	-2.756551	F	NA	NA	NA	NA	NA	NA	NA	NA	NA	NA	NA	NA	NA	NA	NA	NA	NA	NA	F	NA	NA	NA	NA	NA	NA	NA	NA	NA	NA	NA	NA	NA	NA	NA	NA	NA	NA	NA
CCGACAGCATGTTGAAGATCGTGCTCTTGCC	8	CCGACAGCATGTTGAAGATCGTGCTCTTGCCCGAGCCG	38	0.0136186710938546	37.641304	3.09	-3.606638	F	NA	NA	NA	NA	NA	NA	NA	NA	NA	NA	NA	NA	NA	NA	NA	NA	NA	NA	F	NA	NA	NA	NA	NA	NA	NA	NA	NA	NA	NA	NA	NA	NA	NA	NA	NA	NA	NA
CGCGCCACCTCCGAGGCAGCAGGAATACGTC	21	CACTCCGACCCCCACCCCGCGCCACCTCCGAGGCAGCAGGAATACGTCAAT	51	0.0277324680563242	80.556087	1.055667	-6.253767	F	NA	NA	NA	NA	NA	NA	NA	NA	NA	NA	NA	NA	NA	NA	NA	NA	NA	NA	F	NA	NA	NA	NA	NA	NA	NA	NA	NA	NA	NA	NA	NA	NA	NA	NA	NA	NA	NA
TGGGCCTGGGCATTAGCCACACCAGCCACCA	9	GTGGTGGCTGGTGTGGCTAATGCCCAGGCCCACAAGTAT	39	0.0236070795561258	1.963478	9.775333	2.315734	T	20717	chr11	5232970	5233008	NA	39M	0	0	0	3	0	0	F	F	1	0.923076923076923	1	3	F	NA	ENSG00000223609	HBD	-	protein_coding	NA	NA	NA	NA	NA	NA	NA	NA	NA	NA	NA	NA	T	F
TCGCGGTCGCGGTGCGGCTCCAGCCGACCGA	31	GGTCGCGGTCGCGGTGCGGCTCCAGCCGACCGAGCGCACGCTGACCGATGCGGAGATCGAG	61	0.0149598211092977	9.69913	1.101	-3.139041	F	NA	NA	NA	NA	NA	NA	NA	NA	NA	NA	NA	NA	NA	NA	NA	NA	NA	NA	F	NA	NA	NA	NA	NA	NA	NA	NA	NA	NA	NA	NA	NA	NA	NA	NA	NA	NA	NA
ACGCCAGTCGCCAGCGAGGAAATAAGGGTAG	1	ACGCCAGTCGCCAGCGAGGAAATAAGGGTAG	31	0.0356611031647553	84.090435	2.5	-5.071942	T	2899	chr10	84030777	84030792	NA	15S16M	0	0	0	0	0	15	F	T	0.516129032258065	1	1	0	F	NA	NA	NA	NA	NA	NA	NA	NA	NA	ENSG00000200789	+	RNU1-65P	27299	ENSG00000212769	+	HMGN2P8	50636	NA	NA
GAGCGGCGCCATACCACCAAGCCAATCGCGC	2	GCGCGATTGGCTTGGTGGTATGGCGCCGCTCC	32	0.0422744861565207	38.387826	1	-5.262577	T	16865	chr9	76593289	76593305	NA	6S17M9S	0	0	0	0	9	6	T	T	0.53125	1	2	0	F	NA	ENSG00000187210	GCNT1	+	protein_coding	NA	NA	NA	NA	NA	NA	NA	NA	NA	NA	NA	NA	F	T
GATCGAGACATGTAAGCAGCATCATGGAGGC	1	GATCGAGACATGTAAGCAGCATCATGGAGGC	31	0.0275970317588397	1.04087	11.068333	3.410576	T	17055	chr15	44716328	44716358	NA	31M	0	0	0	1	0	0	F	F	1	0.967741935483871	2	1	F	NA	ENSG00000166710	B2M	+	protein_coding	NA	NA	NA	NA	NA	NA	NA	NA	NA	NA	NA	NA	T	F
AGCCCACGCCGCCGGCACGGCGCACCGACTA	17	ACGCGCCGCTGACAATAGTCGGTGCGCCGTGCCGGCGGCGTGGGCTC	47	0.028367383699733	16.079565	1.787	-3.169617	F	NA	NA	NA	NA	NA	NA	NA	NA	NA	NA	NA	NA	NA	NA	NA	NA	NA	NA	F	NA	NA	NA	NA	NA	NA	NA	NA	NA	NA	NA	NA	NA	NA	NA	NA	NA	NA	NA
GATTCCATTCTATTGCACTCGGGTTGATTCC	16	GGAATCAACCCGAGTGCAATAGAATGGAATCGAATGGAATGGAATGCAATGTAATGGATTCAACTTGAATGGAATGGAAAAAAT	84	0.0286613537959184	56.273913	1	-5.814394	T	17394	chr17	21968883	21976158	NA	30M7218N28M26S	0	0	1	4	26	0	T	F	0.69047619047619	0.931034482758621	1	4	F	NA	NA	NA	NA	NA	NA	NA	NA	NA	ENSG00000283566	-	AC243725.1	185419	ENSG00000265233	-	ABBA01006766.1	80428	NA	NA
CCGCTACCAGATCAACACGTTCTTGATCGCC	4	TATCCGCTACCAGATCAACACGTTCTTGATCGCC	34	0.0154731177790241	16.717391	2.232667	-2.90451	T	11237	chr9	12818044	12818061	NA	8S18M8S	0	0	0	0	8	8	T	T	0.529411764705882	1	2	0	F	NA	ENSG00000153714	LURAP1L	+	protein_coding	NA	NA	NA	NA	NA	NA	NA	NA	NA	NA	NA	NA	F	T
AGGTTGGAACAGACAATGTTCTGGCACATGG	31	GCGACTCGACGCGCCCTTAAGGTTGGAACAGACAATGTTCTGGCACATGGCGGTCGTATTG	61	0.0276573790774995	45.057391	1	-5.493692	F	NA	NA	NA	NA	NA	NA	NA	NA	NA	NA	NA	NA	NA	NA	NA	NA	NA	NA	F	NA	NA	NA	NA	NA	NA	NA	NA	NA	NA	NA	NA	NA	NA	NA	NA	NA	NA	NA
CGCCCGTTCCGACATCGGCGAGCCGATGACG	8	CGTCATCGGCTCGCCGATGTCGGAACGGGCGATCACCA	38	0.0412356385884857	21.538261	1.020667	-4.399318	F	NA	NA	NA	NA	NA	NA	NA	NA	NA	NA	NA	NA	NA	NA	NA	NA	NA	NA	F	NA	NA	NA	NA	NA	NA	NA	NA	NA	NA	NA	NA	NA	NA	NA	NA	NA	NA	NA
AGGAGCGCGCGGCCTGCGAGCTTGCGCTCGC	5	AGGAGCGCGCGGCCTGCGAGCTTGCGCTCGCCGTG	35	0.0498139273935997	27.087391	5.584	-2.278251	F	NA	NA	NA	NA	NA	NA	NA	NA	NA	NA	NA	NA	NA	NA	NA	NA	NA	NA	F	NA	NA	NA	NA	NA	NA	NA	NA	NA	NA	NA	NA	NA	NA	NA	NA	NA	NA	NA
CCGACAAGAAGAAGGTGCTGGACAAGTGTCA	3	GCCGACAAGAAGAAGGTGCTGGACAAGTGTCAA	33	0.0417738563127099	30.429565	1.090333	-4.802633	T	10893	GL000250.2	3150071	3150103	NA	33M	0	0	0	0	0	0	F	F	1	1	3	0	F	NA	NA	NA	NA	NA	NA	NA	NA	NA	NA	NA	NA	NA	NA	NA	NA	NA	NA	NA
GCCGATGTGAGACGCATCGATCCAAGGGTCA	44	TGACCCTTGGATCGATGCGTCTCACATCGGCATTACCGACGCGTTAAGGTTAGCGCTGAGGGGCGCCGCGGGCG	74	0.00658238756144964	1	7.343	2.87637	F	NA	NA	NA	NA	NA	NA	NA	NA	NA	NA	NA	NA	NA	NA	NA	NA	NA	NA	F	NA	NA	NA	NA	NA	NA	NA	NA	NA	NA	NA	NA	NA	NA	NA	NA	NA	NA	NA
GCGGTGCGGGAGATGCGCCGGGGGCTGTCCC	17	GCCGCTTAACCGGGACAGCCCCCGGCGCATCTCCCGCACCGCCTGGC	47	0.0228646485486425	24.747826	1	-4.62923	F	NA	NA	NA	NA	NA	NA	NA	NA	NA	NA	NA	NA	NA	NA	NA	NA	NA	NA	F	NA	NA	NA	NA	NA	NA	NA	NA	NA	NA	NA	NA	NA	NA	NA	NA	NA	NA	NA
GAATTGTTCCAGGTCCAGTAGATGACCAGAC	1	GAATTGTTCCAGGTCCAGTAGATGACCAGAC	31	0.0420139479794152	7.462174	1.268	-2.557041	F	NA	NA	NA	NA	NA	NA	NA	NA	NA	NA	NA	NA	NA	NA	NA	NA	NA	NA	F	NA	NA	NA	NA	NA	NA	NA	NA	NA	NA	NA	NA	NA	NA	NA	NA	NA	NA	NA
AATCAAATATATAAACTGAGGAATAAAACAT	9	AATCAAATATATAAACTGAGGAATAAAACATAACCATGA	39	0.0401085069812153	257.55087	3.655	-6.138842	T	1324	KI270734.1	119479	119517	NA	39M	0	0	0	1	0	0	F	F	1	0.974358974358974	3	1	F	NA	NA	NA	NA	NA	NA	NA	NA	NA	NA	NA	NA	NA	NA	NA	NA	NA	NA	NA
ACGATGACGTTCAACAAGTCGTCGCTCTGGC	1	ACGATGACGTTCAACAAGTCGTCGCTCTGGC	31	0.0377451288264647	116.430435	1.136333	-6.678939	T	2839	chr8	39608779	39608795	NA	14S17M	0	0	0	1	0	14	F	T	0.548387096774194	0.941176470588235	1	1	F	NA	ENSG00000168619	ADAM18	+	protein_coding	NA	NA	NA	NA	NA	NA	NA	NA	NA	NA	NA	NA	F	T
CGGCGCCGCGTCGACGCCTGACTCCGCCGAG	40	CCAACCAGCTCGGCGGAGTCAGGCGTCGACGCGGCGCCGCGCATCGCTAGCCCAAGCTTGGTCCTTTCGA	70	0.0103823110213503	10.535652	1.014	-3.37715	F	NA	NA	NA	NA	NA	NA	NA	NA	NA	NA	NA	NA	NA	NA	NA	NA	NA	NA	F	NA	NA	NA	NA	NA	NA	NA	NA	NA	NA	NA	NA	NA	NA	NA	NA	NA	NA	NA
CGCTCTCGCACGCCCTGGAGTGGGGATGGTC	10	CCATCGACCATCCCCACTCCAGGGCGTGCGAGAGCGGCAG	40	0.0134695580629488	76.734783	1.510333	-5.666942	T	14253	chr12	120464017	120464037	NA	21M19S	0	0	0	3	19	0	T	F	0.525	0.857142857142857	1	3	F	NA	ENSG00000111786	SRSF9	-	protein_coding	NA	NA	NA	NA	NA	NA	NA	NA	NA	NA	NA	NA	T	F
CGCGGCCGACCGACCTCGAGGGCTCGCTGTC	3	CGACAGCGAGCCCTCGAGGTCGGTCGGCCGCGC	33	0.0418287855376482	5.573913	1	-2.47869	T	14127	chr7	111992971	111992987	NA	7S17M9S	0	0	0	0	9	7	T	T	0.515151515151515	1	1	0	F	NA	ENSG00000128512	DOCK4	-	protein_coding	NA	NA	NA	NA	NA	NA	NA	NA	NA	NA	NA	NA	F	T
CCCTTCCTGCAATCCCTTGAACAGGTCGCGG	4	GAGCCCTTCCTGCAATCCCTTGAACAGGTCGCGG	34	0.0385730075717085	10.532609	1.615667	-2.704661	T	10850	chr11	44190890	44190907	NA	16S18M	0	0	0	0	0	16	F	T	0.529411764705882	1	1	0	F	NA	ENSG00000151348	EXT2	+	protein_coding	NA	NA	NA	NA	NA	NA	NA	NA	NA	NA	NA	NA	F	T
AGCCGGGCGACAGCGCGATCTCGGCGTTGAG	29	GCGACGCGCTGCTGAACGAGCTCAACGCCGAGATCGCGCTGTCGCCCGGCTTCCGCTGGGG	61	0.045190484744359	9.36087	1.106667	-3.080421	F	NA	NA	NA	NA	NA	NA	NA	NA	NA	NA	NA	NA	NA	NA	NA	NA	NA	NA	F	NA	NA	NA	NA	NA	NA	NA	NA	NA	NA	NA	NA	NA	NA	NA	NA	NA	NA	NA
AGCACATTGGGGCTCCTGAGCCCATCCTTCG	7	CTGTGTGGTAGAGCACATTGGGGCTCCTGAGCCCATCCTTCG	42	0.0477125167097935	9.161304	1	-3.195553	T	4449	GL000250.2	4242025	4242066	NA	42M	0	0	0	0	0	0	F	F	1	1	4	0	F	NA	NA	NA	NA	NA	NA	NA	NA	NA	NA	NA	NA	NA	NA	NA	NA	NA	NA	NA
ATCAGGAGCTCACGACAGTTGAAAGTCGCAG	31	GATCGATCAGGAGCTCACGACAGTTGAAAGTCGCAGCGCGACGAAATGACACCACCAGCCT	61	0.0209096242801556	38.683913	1	-5.273662	F	NA	NA	NA	NA	NA	NA	NA	NA	NA	NA	NA	NA	NA	NA	NA	NA	NA	NA	F	NA	NA	NA	NA	NA	NA	NA	NA	NA	NA	NA	NA	NA	NA	NA	NA	NA	NA	NA
ACGATGGCATCTGGCACACGTTGCTTGATCG	3	TCACGATGGCATCTGGCACACGTTGCTTGATCG	33	0.0231990636763461	68.242609	1.801	-5.243803	F	NA	NA	NA	NA	NA	NA	NA	NA	NA	NA	NA	NA	NA	NA	NA	NA	NA	NA	F	NA	NA	NA	NA	NA	NA	NA	NA	NA	NA	NA	NA	NA	NA	NA	NA	NA	NA	NA
AAGTCACCATGCAGCATGTTTCGCGAGTTCT	13	CGTACGTATCAAGTCACCATGCAGCATGTTTCGCGAGTTCTCA	43	0.0265208110817706	33.437826	2.634333	-3.665971	F	NA	NA	NA	NA	NA	NA	NA	NA	NA	NA	NA	NA	NA	NA	NA	NA	NA	NA	F	NA	NA	NA	NA	NA	NA	NA	NA	NA	NA	NA	NA	NA	NA	NA	NA	NA	NA	NA
ACCAAGCTGCTCGAGGATCGCAAGATCGAGC	64	GTCGAGATCCAGTTCGCGCGGCTCACCAAGCTGCTCGAGGATCGCAAGATCGAGCTCACGCTCGATCCGAAGGCGCGGGATTGGCTCGCGGAGA	94	0	43.798261	1	-5.452802	F	NA	NA	NA	NA	NA	NA	NA	NA	NA	NA	NA	NA	NA	NA	NA	NA	NA	NA	F	NA	NA	NA	NA	NA	NA	NA	NA	NA	NA	NA	NA	NA	NA	NA	NA	NA	NA	NA
CCGGGGTCCCGAAGGCCACACGCAGGGCGAG	4	ACCGGGGTCCCGAAGGCCACACGCAGGGCGAGGA	34	0.0454056649175773	1	5.827	2.542753	T	11502	chr6	6174627	6174643	NA	17S17M	0	0	0	0	0	17	F	T	0.5	1	1	0	F	NA	ENSG00000124491	F13A1	-	protein_coding	NA	NA	NA	NA	NA	NA	NA	NA	NA	NA	NA	NA	T	F
TCGGCAGCTAGCCACGCGATGTACGCATACA	3	TCGGCAGCTAGCCACGCGATGTACGCATACACA	33	0.0430100905886011	20.75	7.217333	-1.523574	F	NA	NA	NA	NA	NA	NA	NA	NA	NA	NA	NA	NA	NA	NA	NA	NA	NA	NA	F	NA	NA	NA	NA	NA	NA	NA	NA	NA	NA	NA	NA	NA	NA	NA	NA	NA	NA	NA
ACGCTCGGCAAGGTGCCGGAATATTTCACGG	34	CGCACGCTCGGCAAGGTGCCGGAATATTTCACGGTCGAGCAGTTCGACGTCAATGTCGAGCAGCGCTA	68	0.031971157213509	24.880435	1	-4.63694	F	NA	NA	NA	NA	NA	NA	NA	NA	NA	NA	NA	NA	NA	NA	NA	NA	NA	NA	F	NA	NA	NA	NA	NA	NA	NA	NA	NA	NA	NA	NA	NA	NA	NA	NA	NA	NA	NA
CAGCTGGCGCGTTCAAGTCAGGAGGAAGAGC	5	CAGCTGGCGCGTTCAAGTCAGGAGGAAGAGCGAGT	35	0.0320577316438781	32.304348	2.674	-3.594657	T	9250	chr2	23281471	23281488	NA	5S18M12S	0	0	0	0	12	5	T	T	0.514285714285714	1	1	0	F	NA	NA	NA	NA	NA	NA	NA	NA	NA	ENSG00000232451	-	AC018467.1	82416	ENSG00000223530	-	AC012506.1	49175	NA	NA
ACGGCAGCCTGCTGCTGAAGGCGGTGCTGAC	3	CCGTCAGCACCGCCTTCAGCAGCAGGCTGCCGT	33	0.0492126772659709	1	10.181667	3.347902	T	3223	chr1	35531161	35531181	NA	21M12S	0	0	0	1	12	0	T	F	0.636363636363636	0.952380952380952	1	1	F	NA	ENSG00000142687	KIAA0319L	-	protein_coding	NA	NA	NA	NA	NA	NA	NA	NA	NA	NA	NA	NA	F	T
ATCTACTCGATTGCCGGCACTATGGACATCG	4	GTCATCTACTCGATTGCCGGCACTATGGACATCG	34	0.0171611785315097	58.364783	1	-5.867026	T	7381	chr14	74767471	74767487	NA	17S17M	0	0	0	2	0	17	F	T	0.5	0.882352941176471	1	2	F	NA	ENSG00000119596	YLPM1	+	protein_coding	NA	NA	NA	NA	NA	NA	NA	NA	NA	NA	NA	NA	F	T
CCGCGGGCCTCGGCTGCACGATCGCGACGAC	19	GATCGGCGCACTGACCGCGGGCCTCGGCTGCACGATCGCGACGACGCAT	49	0.0441780871979904	1	7.525	2.911692	F	NA	NA	NA	NA	NA	NA	NA	NA	NA	NA	NA	NA	NA	NA	NA	NA	NA	NA	F	NA	NA	NA	NA	NA	NA	NA	NA	NA	NA	NA	NA	NA	NA	NA	NA	NA	NA	NA
GGAATTAGGGGTCTCCTGCTCTTCGTCCTAA	20	TATCGCCATGGTGACGGAATTAGGGGTCTCCTGCTCTTCGTCCTAAGGACCA	52	0.0354170802228412	5274.458696	122.535333	-5.427753	F	NA	NA	NA	NA	NA	NA	NA	NA	NA	NA	NA	NA	NA	NA	NA	NA	NA	NA	F	NA	NA	NA	NA	NA	NA	NA	NA	NA	NA	NA	NA	NA	NA	NA	NA	NA	NA	NA
GCATTCAGCGTGCGAAGGCCGAGGGCAAGGC	16	CAAGTGCCTTGCCCTCGGCCTTCGCACGCTGAATGCCGGCCAACTGCCG	49	0.0250793719743045	26.14	1.583	-4.045526	F	NA	NA	NA	NA	NA	NA	NA	NA	NA	NA	NA	NA	NA	NA	NA	NA	NA	NA	F	NA	NA	NA	NA	NA	NA	NA	NA	NA	NA	NA	NA	NA	NA	NA	NA	NA	NA	NA
CCGGAGCCGGCGCAGCCGGGGGCCCATGAAA	4	GCCGGAGCCGGCGCAGCCGGGGGCCCATGAAAAC	34	0.031341753897541	6.682609	1	-2.740411	T	11312	chr16	1048594	1048610	NA	17M17S	0	0	0	0	17	0	T	F	0.5	1	1	0	F	NA	NA	NA	NA	NA	NA	NA	NA	NA	ENSG00000260496	-	AC009041.1	47669	ENSG00000261713	-	SSTR5-AS1	15482	NA	NA
GAACGGCCATGCACCACCACCCACTGAATCA	11	GAACGGCCATGCACCACCACCCACTGAATCAAGAAAGAGCT	41	0.032929042230196	17.963478	4.429	-2.020014	T	16282	chr21	8210931	8210971	NA	41M	0	0	0	2	0	0	F	F	1	0.951219512195122	3	2	F	NA	ENSG00000280800	FP671120.4	-	lncRNA	NA	NA	NA	NA	NA	NA	NA	NA	NA	NA	NA	NA	T	F
CGCCGAGCCGCTTCAGGAACAGCGCCTCGAC	37	GCGCTTCGAGCGTCACTGCGCCGAGCCGCTTCAGGAACAGCGCCTCGACCTCGCGAAACGTCCCGGA	67	0.0348419554144272	36.62087	1	-5.194594	F	NA	NA	NA	NA	NA	NA	NA	NA	NA	NA	NA	NA	NA	NA	NA	NA	NA	NA	F	NA	NA	NA	NA	NA	NA	NA	NA	NA	NA	NA	NA	NA	NA	NA	NA	NA	NA	NA
AGCAGATGAAGACGATGATGATTCAGATCTG	9	GGAGAGTACAGATCTGAATCATCATCGTCTTCATCTGCT	39	0.0331943833322478	3.295652	15.945667	2.274529	T	4544	chr10	95384261	95384285	NA	25M14S	0	0	0	0	14	0	T	F	0.641025641025641	1	1	0	F	NA	ENSG00000095637	SORBS1	-	protein_coding	NA	NA	NA	NA	NA	NA	NA	NA	NA	NA	NA	NA	T	T
TGCAACTCATTATCGTCCTGATGGCTTTCCA	42	TCAATCTCGATGTCCTGCAACTCATTATCGTCCTGATGGCTTTCCAGCCCATTATCGTGTGCGGACTGTTCT	72	0.0299116773145065	1	9.179	3.198337	F	NA	NA	NA	NA	NA	NA	NA	NA	NA	NA	NA	NA	NA	NA	NA	NA	NA	NA	F	NA	NA	NA	NA	NA	NA	NA	NA	NA	NA	NA	NA	NA	NA	NA	NA	NA	NA	NA
CCTCGAAGACGCCGACGTCGATCTATCTCGC	7	CCCGTACCTCGAAGACGCCGACGTCGATCTATCTCGC	37	0.042704197786536	1	5.404	2.434028	F	NA	NA	NA	NA	NA	NA	NA	NA	NA	NA	NA	NA	NA	NA	NA	NA	NA	NA	F	NA	NA	NA	NA	NA	NA	NA	NA	NA	NA	NA	NA	NA	NA	NA	NA	NA	NA	NA
AAATTCACCAAGCGTTGGATTGTTCACCCAT	5	AAATTCACCAAGCGTTGGATTGTTCACCCATGCAAG	36	0.0452839355402303	1	7.580333	2.922261	T	439	chr1	91387247	91387276	NA	6S30M	0	0	0	1	0	6	F	T	0.833333333333333	0.966666666666667	6	1	F	NA	ENSG00000162669	HFM1	-	protein_coding	NA	NA	NA	NA	NA	NA	NA	NA	NA	NA	NA	NA	F	T
ATGAGCTATCTGGAGTCGTTGCCGCGACGCC	23	CGGCAGATAGAGCGTCACCAGGCGTCGCGGCAACGACTCCAGATAGCTCATGC	53	0.0324116493850713	11.085217	1	-3.470565	F	NA	NA	NA	NA	NA	NA	NA	NA	NA	NA	NA	NA	NA	NA	NA	NA	NA	NA	F	NA	NA	NA	NA	NA	NA	NA	NA	NA	NA	NA	NA	NA	NA	NA	NA	NA	NA	NA
GCCTGCGCCATCATCGGATCGAGCCCGGCCC	10	GGCCTGCGCCATCATCGGATCGAGCCCGGCCCAGGCGTCG	40	0.0294316260371882	11.273913	1	-3.494916	F	NA	NA	NA	NA	NA	NA	NA	NA	NA	NA	NA	NA	NA	NA	NA	NA	NA	NA	F	NA	NA	NA	NA	NA	NA	NA	NA	NA	NA	NA	NA	NA	NA	NA	NA	NA	NA	NA
CGACCAGGCGACTTGACACGTCGGGCAACTC	12	AGCGCTCGACCAGGCGACTTGACACGTCGGGCAACTCGCGGA	42	0.0257132437938972	12.536087	1	-3.648015	F	NA	NA	NA	NA	NA	NA	NA	NA	NA	NA	NA	NA	NA	NA	NA	NA	NA	NA	F	NA	NA	NA	NA	NA	NA	NA	NA	NA	NA	NA	NA	NA	NA	NA	NA	NA	NA	NA
GCATCCGCACAGCCCGGCGCATAACAGGGAC	2	AGCATCCGCACAGCCCGGCGCATAACAGGGAC	32	0.0490549790985977	67.454348	1.343667	-5.649664	T	17473	chr12	25251330	25251346	NA	15S17M	0	0	0	1	0	15	F	T	0.53125	0.941176470588235	1	1	F	NA	NA	NA	NA	NA	NA	NA	NA	NA	ENSG00000133703	-	KRAS	395	ENSG00000278743	-	AC087239.1	134323	NA	NA
CGCCGAGTCGGCTGCCGCGCTTGGCCAATAG	15	CGAGCTATTGGCCAAGCGCGGCAGCCGACTCGGCGGTAATACCGG	45	0.0381926984995647	22.723913	1.713333	-3.729334	F	NA	NA	NA	NA	NA	NA	NA	NA	NA	NA	NA	NA	NA	NA	NA	NA	NA	NA	F	NA	NA	NA	NA	NA	NA	NA	NA	NA	NA	NA	NA	NA	NA	NA	NA	NA	NA	NA
AATGACCGAGTTTGACGAACTTTCCGGCTTG	1	AATGACCGAGTTTGACGAACTTTCCGGCTTG	31	0.0332138325180106	4.831304	1.069333	-2.175701	F	NA	NA	NA	NA	NA	NA	NA	NA	NA	NA	NA	NA	NA	NA	NA	NA	NA	NA	F	NA	NA	NA	NA	NA	NA	NA	NA	NA	NA	NA	NA	NA	NA	NA	NA	NA	NA	NA
GCTAAGGGGATAATCATTGAATGGAATTGAA	4	TTCAATTCCATTCAATGATTATCCCCTTAGCGTA	34	0.0386459288309207	135.263478	1.091	-6.953977	T	18446	chr16	46386433	46386466	NA	34M	0	0	0	2	0	0	F	F	1	0.941176470588235	2	2	F	NA	NA	NA	NA	NA	NA	NA	NA	NA	ENSG00000261084	+	PPP1R1AP2	10473918	ENSG00000261239	-	ANKRD26P1	82874	NA	NA
ACCAGGTCATCGACACGATGTGCTCGGGCCT	1	ACCAGGTCATCGACACGATGTGCTCGGGCCT	31	0.0446858803418803	16.156522	1	-4.014045	F	NA	NA	NA	NA	NA	NA	NA	NA	NA	NA	NA	NA	NA	NA	NA	NA	NA	NA	F	NA	NA	NA	NA	NA	NA	NA	NA	NA	NA	NA	NA	NA	NA	NA	NA	NA	NA	NA
ACGGGCCTCGGTGCGCACAGCCTGACAAGCT	49	ACGCAGCTGAGCAGCACGACGGGCCTCGGTGCGCACAGCCTGACAAGCTGAACATTCGACCTCATGTTCAGTGGGAGGT	79	0.0336381127310233	75.157826	1	-6.231851	F	NA	NA	NA	NA	NA	NA	NA	NA	NA	NA	NA	NA	NA	NA	NA	NA	NA	NA	F	NA	NA	NA	NA	NA	NA	NA	NA	NA	NA	NA	NA	NA	NA	NA	NA	NA	NA	NA
CGCAAGGCCGCGGAGATAGCTGTCGTCGGTC	9	GACCGACGACAGCTATCTCCGCGGCCTTGCGTCCGCCGG	39	0.0443549012097597	1	9.233333	3.206852	F	NA	NA	NA	NA	NA	NA	NA	NA	NA	NA	NA	NA	NA	NA	NA	NA	NA	NA	F	NA	NA	NA	NA	NA	NA	NA	NA	NA	NA	NA	NA	NA	NA	NA	NA	NA	NA	NA
ATACGATGGCGATGGGTGTTGCCACCAACGC	10	GATACGATGGCGATGGGTGTTGCCACCAACGCGCTGAACT	40	0.0305893925174382	7.764348	1	-2.956865	F	NA	NA	NA	NA	NA	NA	NA	NA	NA	NA	NA	NA	NA	NA	NA	NA	NA	NA	F	NA	NA	NA	NA	NA	NA	NA	NA	NA	NA	NA	NA	NA	NA	NA	NA	NA	NA	NA
CATCGACGGCGCCGACATGATCCGCCTCGCC	6	ATATCATCGACGGCGCCGACATGATCCGCCTCGCCG	36	0.0487951347113553	29.102609	1	-4.863077	F	NA	NA	NA	NA	NA	NA	NA	NA	NA	NA	NA	NA	NA	NA	NA	NA	NA	NA	F	NA	NA	NA	NA	NA	NA	NA	NA	NA	NA	NA	NA	NA	NA	NA	NA	NA	NA	NA
CCGTGGTCGAGGCTCATATCGAGATATTGCG	2	GCCGTGGTCGAGGCTCATATCGAGATATTGCG	32	0.0436123763986365	10.148696	2.53	-2.004085	T	11644	chr2	149785720	149785736	NA	15S17M	0	0	0	1	0	15	F	T	0.53125	0.941176470588235	1	1	F	NA	ENSG00000162947	LINC01931	-	lncRNA	NA	NA	NA	NA	NA	NA	NA	NA	NA	NA	NA	NA	F	T
GCGGCATCACCCGGGCCGCCGAAGAGCTCAA	1	GCGGCATCACCCGGGCCGCCGAAGAGCTCAA	31	0.048135887732703	27.886522	1	-4.801496	T	18230	chr16	2211945	2211961	NA	17M14S	0	0	0	1	14	0	T	F	0.548387096774194	0.941176470588235	1	1	F	NA	ENSG00000182685	BRICD5	-	protein_coding	NA	NA	NA	NA	NA	NA	NA	NA	NA	NA	NA	NA	T	T
CGGCCGAGCTCGCGATCGGCCTTGCCGCGAA	1	CGGCCGAGCTCGCGATCGGCCTTGCCGCGAA	31	0.0257824466866904	8.76087	1.051333	-3.058854	F	NA	NA	NA	NA	NA	NA	NA	NA	NA	NA	NA	NA	NA	NA	NA	NA	NA	NA	F	NA	NA	NA	NA	NA	NA	NA	NA	NA	NA	NA	NA	NA	NA	NA	NA	NA	NA	NA
CCGGTCGAGCAGCGCGCGCATGTCCTTGTAG	2	GCCGGTCGAGCAGCGCGCGCATGTCCTTGTAG	32	0.0423747719663628	31.345652	1	-4.970193	T	11528	chr7	44111221	44111236	NA	16M16S	0	0	0	0	16	0	T	F	0.5	1	1	0	F	NA	ENSG00000106624	AEBP1	+	protein_coding	NA	NA	NA	NA	NA	NA	NA	NA	NA	NA	NA	NA	T	F
ACAGGGATGAAGTTGTTGGGTGCGATCAGCC	32	CTGGTGCGCTGGAATCACTCGCTGCGCGGGCTGATCGCACCCAACAACTTCATCCCTGTCGC	62	0.0203838112821823	1	11.060667	3.467366	F	NA	NA	NA	NA	NA	NA	NA	NA	NA	NA	NA	NA	NA	NA	NA	NA	NA	NA	F	NA	NA	NA	NA	NA	NA	NA	NA	NA	NA	NA	NA	NA	NA	NA	NA	NA	NA	NA
ACTACGTATTCCGTGATCCTGTTGTTCAACG	8	GCAGACGTTGAACAACAGGATCACGGAATACGTAGTTC	38	0.00939060452599388	1.118696	8.359667	2.901627	F	NA	NA	NA	NA	NA	NA	NA	NA	NA	NA	NA	NA	NA	NA	NA	NA	NA	NA	F	NA	NA	NA	NA	NA	NA	NA	NA	NA	NA	NA	NA	NA	NA	NA	NA	NA	NA	NA
CCCAGCTCGGCCAGCAGATCAGCCAGATCTC	9	GACGCCCGAGATCTGGCTGATCTGCTGGCCGAGCTGGGC	39	0.0444266396119016	5.868261	1.340667	-2.129982	F	NA	NA	NA	NA	NA	NA	NA	NA	NA	NA	NA	NA	NA	NA	NA	NA	NA	NA	F	NA	NA	NA	NA	NA	NA	NA	NA	NA	NA	NA	NA	NA	NA	NA	NA	NA	NA	NA
CTCGCGAGTTCCTGGCGCCAAGCCGTCGCGA	2	TCGCGACGGCTTGGCGCCAGGAACTCGCGAGC	32	0.0462184485033494	23.506522	1	-4.554989	T	15649	chr1	114155697	114155712	NA	16M16S	0	0	0	1	16	0	T	F	0.5	0.9375	1	1	F	NA	NA	NA	NA	NA	NA	NA	NA	NA	ENSG00000134207	-	SYT6	1779	ENSG00000232895	-	AL121999.1	50714	NA	NA
CACCAGAGTAGAATGGAATGGAATGGAATGG	25	GAATCGAATGGAAAGGAAAGTAATGGAACCCACCAGAGTAGAATGGAATGGAATGGAATGGAATA	65	0.0279433672928758	102.75	1	-6.682995	T	8919	chr10	41888195	41896225	NA	5S27M7972N2M1I30M	1	0	1	3	0	5	F	T	0.923076923076923	0.916666666666667	1	4	F	NA	NA	NA	NA	NA	NA	NA	NA	NA	ENSG00000233832	+	AL590623.1	3105088	ENSG00000229485	-	KSR1P1	253084	NA	NA
GCCATGCTGCTTTGCATGGGGTTGTTTTCGA	69	CAAACGCGCCGCACGTCGCGCCGGCAAAACATCGAAAACAACCCCATGCAAAGCAGCATGGCCGCGATCCAGACGTAAAAAAGCGACTTGACTCGTCGGGCAAATCAGCCGC	112	0.00169152547153182	19.546957	2.665	-2.874737	F	NA	NA	NA	NA	NA	NA	NA	NA	NA	NA	NA	NA	NA	NA	NA	NA	NA	NA	F	NA	NA	NA	NA	NA	NA	NA	NA	NA	NA	NA	NA	NA	NA	NA	NA	NA	NA	NA
AGCCAACATCCTGGTTGTTTTGGGATCCTCA	31	AAGTCATGGCTAAGTGGGAAAGGATGTGAGGATCCCAAAACAACCAGGATGTTGGCTTAGAAGC	64	0.00436579799818016	49.906957	11.416	-2.128184	F	NA	NA	NA	NA	NA	NA	NA	NA	NA	NA	NA	NA	NA	NA	NA	NA	NA	NA	F	NA	NA	NA	NA	NA	NA	NA	NA	NA	NA	NA	NA	NA	NA	NA	NA	NA	NA	NA
CGCGAAGCCGCCGGTCGCGTAGAACAGCCAA	17	CCACGCGAAGCCGCCGGTCGCGTAGAACAGCCAAGAACGGGGCGCGT	47	0.0355629684328419	17.928696	1.048667	-4.095642	F	NA	NA	NA	NA	NA	NA	NA	NA	NA	NA	NA	NA	NA	NA	NA	NA	NA	NA	F	NA	NA	NA	NA	NA	NA	NA	NA	NA	NA	NA	NA	NA	NA	NA	NA	NA	NA	NA
ACCGTTCTGGCATTCGGCATAACGGCCGCCC	21	AGCGGGCGAGCAGATCGAGGACCGTTCTGGCATTCGGCATAACGGCCGCCC	51	0.0186320605650362	1	11.916333	3.574868	F	NA	NA	NA	NA	NA	NA	NA	NA	NA	NA	NA	NA	NA	NA	NA	NA	NA	NA	F	NA	NA	NA	NA	NA	NA	NA	NA	NA	NA	NA	NA	NA	NA	NA	NA	NA	NA	NA
CGTGCACGGCAAGGAGATCATGGCGATCTTC	11	CGAAGATCGCCATGATCTCCTTGCCGTGCACGACGCGGTCG	41	0.0182484439931318	12.48	1	-3.641546	F	NA	NA	NA	NA	NA	NA	NA	NA	NA	NA	NA	NA	NA	NA	NA	NA	NA	NA	F	NA	NA	NA	NA	NA	NA	NA	NA	NA	NA	NA	NA	NA	NA	NA	NA	NA	NA	NA
GCGGCGTCGCGGTCGCAAGATCTCATTATCA	57	GCTGGATCATATGCCGAGTTGACCTTCTTCAAGATGATAATGAGATCTTGCGACCGCGACGCCGCAAAGTGGGGCGCGCCTTGCCATAGCGCAAGCG	97	0.0377253366132907	20.109565	1	-4.32981	F	NA	NA	NA	NA	NA	NA	NA	NA	NA	NA	NA	NA	NA	NA	NA	NA	NA	NA	F	NA	NA	NA	NA	NA	NA	NA	NA	NA	NA	NA	NA	NA	NA	NA	NA	NA	NA	NA
GGCATTCTGCTCGACGAGATATCCTTCGGCC	25	CGACCCGTGCGCGCAGATGCTCGATGGCGCGCTGCTGATCAAGGCCGAAGGATATCTCGTCGAGCAGAATGCCG	74	0.0217864916456448	9.62087	1	-3.266167	F	NA	NA	NA	NA	NA	NA	NA	NA	NA	NA	NA	NA	NA	NA	NA	NA	NA	NA	F	NA	NA	NA	NA	NA	NA	NA	NA	NA	NA	NA	NA	NA	NA	NA	NA	NA	NA	NA
CATTGCCTTCCATTCCATTCCATTCCACTCG	7	GGAGCCACCCGAGTGGAATGGAATGGAATGGAAGGCAATGGAA	43	0.0336223184108771	46.357826	1	-5.534741	T	9950	chr2	89830356	89830385	NA	30M13S	0	0	0	0	13	0	T	F	0.697674418604651	1	2	0	F	NA	NA	NA	NA	NA	NA	NA	NA	NA	ENSG00000283659	+	AC006453.5	147153	ENSG00000251039	+	IGKV2D-40	21405	NA	NA
ACCGACACCGGCTCGGGACAGATCACCCATC	15	CCGAGGAAAAATGGATGGGTGATCTGTCCCGAGCCGGTGTCGGTG	45	0.0330561980785616	7.90087	1	-2.982012	F	NA	NA	NA	NA	NA	NA	NA	NA	NA	NA	NA	NA	NA	NA	NA	NA	NA	NA	F	NA	NA	NA	NA	NA	NA	NA	NA	NA	NA	NA	NA	NA	NA	NA	NA	NA	NA	NA
ATGCGAAGGCCATCAACGCCTTCACTAACCC	16	CGTCGACGGGTTAGTGAAGGCGTTGATGGCCTTCGCATGCTTGATAATCCC	51	0.00628985007746395	19.699565	3.765667	-2.387186	F	NA	NA	NA	NA	NA	NA	NA	NA	NA	NA	NA	NA	NA	NA	NA	NA	NA	NA	F	NA	NA	NA	NA	NA	NA	NA	NA	NA	NA	NA	NA	NA	NA	NA	NA	NA	NA	NA
GCTCGTCATGGAGATGGGTGAGGCTTGGCGA	13	CGCACTCGCCAAGCCTCACCCATCTCCATGACGAGCTCGCCAT	43	0.0469747103085275	58.281304	2.482333	-4.553265	F	NA	NA	NA	NA	NA	NA	NA	NA	NA	NA	NA	NA	NA	NA	NA	NA	NA	NA	F	NA	NA	NA	NA	NA	NA	NA	NA	NA	NA	NA	NA	NA	NA	NA	NA	NA	NA	NA
GGCGGCAAGCTCGGTTTCATCACGCCGATGA	29	CCGAGACCGGCGGCAAGCTCGGTTTCATCACGCCGATGACCCACAATTTCTGCGAGTCCTGCAACCGGG	69	0.00507802902933172	32.685217	2.165333	-3.915977	F	NA	NA	NA	NA	NA	NA	NA	NA	NA	NA	NA	NA	NA	NA	NA	NA	NA	NA	F	NA	NA	NA	NA	NA	NA	NA	NA	NA	NA	NA	NA	NA	NA	NA	NA	NA	NA	NA
AGGGCCGTGCGGCGGTTGATCTCGAGGCGGC	70	CGTTGGCCGCAATCGCGGCCGAGGTCAGCAGGGCCGTGCGGCGGTTGATCTCGAGGCGGCTCAAATCCATACGCGGGTCTCCAGAACTTACATAAAGGCT	100	0	17.826957	1	-4.155989	F	NA	NA	NA	NA	NA	NA	NA	NA	NA	NA	NA	NA	NA	NA	NA	NA	NA	NA	F	NA	NA	NA	NA	NA	NA	NA	NA	NA	NA	NA	NA	NA	NA	NA	NA	NA	NA	NA
CGCCGCCGCTTCACGGCGAGCCTCGGCTACA	7	TGACCGCCGCCGCTTCACGGCGAGCCTCGGCTACAAA	37	0.0327839317021438	11.406522	1.182	-3.270557	F	NA	NA	NA	NA	NA	NA	NA	NA	NA	NA	NA	NA	NA	NA	NA	NA	NA	NA	F	NA	NA	NA	NA	NA	NA	NA	NA	NA	NA	NA	NA	NA	NA	NA	NA	NA	NA	NA
CCGCCGCGACCAGCGCCAGCATTTCGACGGC	1	CCGCCGCGACCAGCGCCAGCATTTCGACGGC	31	0.0123556423523775	1.1	7.125667	2.695522	T	11137	chr17	50699443	50699458	NA	8S16M7S	0	0	0	0	7	8	T	T	0.516129032258065	1	1	0	F	NA	ENSG00000154945	ANKRD40	-	protein_coding	NA	NA	NA	NA	NA	NA	NA	NA	NA	NA	NA	NA	T	F
ATACAGCTTCTTTCGTCACTCTTGGCTTCAT	18	AATGAAGCCAAGAGTGACGAAAGAAGCTGTATCTACTCCATCACGAAT	48	0.0409637192706826	1	6.095333	2.607705	T	6368	chr3	191380160	191380207	NA	48M	0	0	0	1	0	0	F	F	1	0.979166666666667	1	1	F	NA	ENSG00000152492	CCDC50	+	protein_coding	NA	NA	NA	NA	NA	NA	NA	NA	NA	NA	NA	NA	T	F
CGAAGGGCTGACCGACGAGCAGTTCATCGCG	4	CACCGAAGGGCTGACCGACGAGCAGTTCATCGCG	34	0.0408082770695841	1.079565	5.231667	2.276821	T	12580	chr12	52900618	52900635	NA	12S18M4S	0	0	0	0	4	12	T	T	0.529411764705882	1	1	0	F	NA	ENSG00000170421	KRT8	-	protein_coding	NA	NA	NA	NA	NA	NA	NA	NA	NA	NA	NA	NA	T	F
CGGGCCGGTTGAGCCCGACCGTCAGCACCGC	47	CTTGGCGGGCCGGTTGAGCCCGACCGTCAGCACCGCCCCTCGCGTCTCGATCCTGAGCAGCGAGGCGTCACCCGCATCGGCA	82	0.0176001688942655	1	8.853333	3.146221	F	NA	NA	NA	NA	NA	NA	NA	NA	NA	NA	NA	NA	NA	NA	NA	NA	NA	NA	F	NA	NA	NA	NA	NA	NA	NA	NA	NA	NA	NA	NA	NA	NA	NA	NA	NA	NA	NA
GCCCTCGGCCGCAAGCTTCTTCTTGCGTTCC	19	GGAACGCAAGAAGAAGCTTGCGGCCGAGGGCCTGTTCGACGAGGCGCGC	49	0.0273161591128767	40.405217	1	-5.33647	F	NA	NA	NA	NA	NA	NA	NA	NA	NA	NA	NA	NA	NA	NA	NA	NA	NA	NA	F	NA	NA	NA	NA	NA	NA	NA	NA	NA	NA	NA	NA	NA	NA	NA	NA	NA	NA	NA
ACCATCAACAAGGCGAAGACCGCCAATGTCG	3	ACCATCAACAAGGCGAAGACCGCCAATGTCGCG	33	0.0285424396690371	10.950435	1	-3.452916	F	NA	NA	NA	NA	NA	NA	NA	NA	NA	NA	NA	NA	NA	NA	NA	NA	NA	NA	F	NA	NA	NA	NA	NA	NA	NA	NA	NA	NA	NA	NA	NA	NA	NA	NA	NA	NA	NA
CAAGATCGGCCCGAAGAAATAGGCGGTGCCG	8	GCGGCACCGCCTATTTCTTCGGGCCGATCTTGGGCGCC	38	0.00690094108535708	26.5	1	-4.72792	F	NA	NA	NA	NA	NA	NA	NA	NA	NA	NA	NA	NA	NA	NA	NA	NA	NA	NA	F	NA	NA	NA	NA	NA	NA	NA	NA	NA	NA	NA	NA	NA	NA	NA	NA	NA	NA	NA
CCGAAGCTATGCTCGAACTGATAGCCGACCG	9	GCCGAAGCTATGCTCGAACTGATAGCCGACCGAACTCAG	39	0.0103823110213503	17.333478	1	-4.115489	F	NA	NA	NA	NA	NA	NA	NA	NA	NA	NA	NA	NA	NA	NA	NA	NA	NA	NA	F	NA	NA	NA	NA	NA	NA	NA	NA	NA	NA	NA	NA	NA	NA	NA	NA	NA	NA	NA
CAAGATTACCCAGACCTCTCGGCCAAGGTGA	21	CGACTGAGTTTCACAAGATTACCCAGACCTCTCGGCCAAGGTGAAAACTCGCTGGC	56	0.00601971269054639	72.715217	1	-6.184185	F	NA	NA	NA	NA	NA	NA	NA	NA	NA	NA	NA	NA	NA	NA	NA	NA	NA	NA	F	NA	NA	NA	NA	NA	NA	NA	NA	NA	NA	NA	NA	NA	NA	NA	NA	NA	NA	NA
CCCATGGCTAGATCACTCCGCTTCGGGTCTA	3	GCGTGTTCTAGACCCGAAGCGGAGTGATCTAGCCATGGG	39	0.00268720918510221	47.9	1	-5.581954	F	NA	NA	NA	NA	NA	NA	NA	NA	NA	NA	NA	NA	NA	NA	NA	NA	NA	NA	F	NA	NA	NA	NA	NA	NA	NA	NA	NA	NA	NA	NA	NA	NA	NA	NA	NA	NA	NA
ATCATGACGAACTCACGACCGCGCAGGATGC	5	TCCATCATGACGAACTCACGACCGCGCAGGATGCC	35	0.0420360168046287	56.716522	1.119	-5.663487	F	NA	NA	NA	NA	NA	NA	NA	NA	NA	NA	NA	NA	NA	NA	NA	NA	NA	NA	F	NA	NA	NA	NA	NA	NA	NA	NA	NA	NA	NA	NA	NA	NA	NA	NA	NA	NA	NA
TGGGCGTTGGCCCGTCACAGAACCGAATGAA	11	GCCTCGGCAATGGGCGTTGGCCCGTCACAGAACCGAATGAA	41	0.04915512960494	78.858696	1.265	-5.962061	F	NA	NA	NA	NA	NA	NA	NA	NA	NA	NA	NA	NA	NA	NA	NA	NA	NA	NA	F	NA	NA	NA	NA	NA	NA	NA	NA	NA	NA	NA	NA	NA	NA	NA	NA	NA	NA	NA
CCTCGTTGGCCTCGGCGCCGGAGTTGCAGAA	2	GCCTCGTTGGCCTCGGCGCCGGAGTTGCAGAA	32	0.0485279611285714	44.847391	1	-5.486952	T	11986	chr20	49255856	49255872	NA	17M15S	0	0	0	2	15	0	T	F	0.53125	0.882352941176471	1	2	F	NA	ENSG00000124201	ZNFX1	-	protein_coding	NA	NA	NA	NA	NA	NA	NA	NA	NA	NA	NA	NA	T	F
ACGCTGCAGGGCGTGTGTGCGAACGGGACCG	7	CGAGCACGCTGCAGGGCGTGTGTGCGAACGGGACCGG	37	0.0291053741463687	21.67	1	-4.437627	T	3148	chr2	236177218	236177235	NA	18M19S	0	0	0	0	19	0	T	F	0.486486486486487	1	1	0	F	NA	ENSG00000233611	AC019068.1	+	lncRNA	NA	NA	NA	NA	NA	NA	NA	NA	NA	NA	NA	NA	F	T
CAAGGGGCCTTGTCACATATCTCTGCACTGA	40	ACATCACATGGGTGATCAGTGCAGAGATATGTGACAAGGCCCCTTGAAGCAGAGCCTAGACAATACTTACATCACCTGAGTGATCAGTG	89	0.0275970317588397	410.105652	20.871333	-4.296401	T	8645	chr4	190179881	190179969	NA	89M	0	0	0	3	0	0	F	F	1	0.966292134831461	7	3	F	NA	ENSG00000260596	DUX4	+	protein_coding	NA	NA	NA	NA	NA	NA	NA	NA	NA	NA	NA	NA	F	T
GCGACGAGTACCCGCTTGATGGTCCTATCCA	2	GCGACGAGTACCCGCTTGATGGTCCTATCCAC	32	0.0336524541178435	90.143913	1	-6.494158	T	17948	chr18	76558216	76558231	NA	16S16M	0	0	0	0	0	16	F	T	0.5	1	1	0	F	NA	ENSG00000266256	LINC00683	+	lncRNA	NA	NA	NA	NA	NA	NA	NA	NA	NA	NA	NA	NA	T	F
AAATGCGCATGTATAAATCGAAGAGCGTCGC	17	GCGGGAAATGCGCATGTATAAATCGAAGAGCGTCGCGGTTGTAGTGC	47	0.0332138325180106	10.58913	1	-3.404512	F	NA	NA	NA	NA	NA	NA	NA	NA	NA	NA	NA	NA	NA	NA	NA	NA	NA	NA	F	NA	NA	NA	NA	NA	NA	NA	NA	NA	NA	NA	NA	NA	NA	NA	NA	NA	NA	NA
GGTGTTTCTGGCAATCGAAACGCTTGTAAAC	24	CGCGTTACCGTTTACAAGCGTTTCGATTGCCAGAAACACCACCTTGGGATGATCAGG	57	0.0178064492481922	41.925652	2.398	-4.12793	F	NA	NA	NA	NA	NA	NA	NA	NA	NA	NA	NA	NA	NA	NA	NA	NA	NA	NA	F	NA	NA	NA	NA	NA	NA	NA	NA	NA	NA	NA	NA	NA	NA	NA	NA	NA	NA	NA
GTCCTCTCGGCCTCCCTCGCACCGGGTGGCA	11	GTCCTCTCGGCCTCCCTCGCACCGGGTGGCACCCTGACTGG	41	0.0479820547602726	38.026957	1.028	-5.20911	F	NA	NA	NA	NA	NA	NA	NA	NA	NA	NA	NA	NA	NA	NA	NA	NA	NA	NA	F	NA	NA	NA	NA	NA	NA	NA	NA	NA	NA	NA	NA	NA	NA	NA	NA	NA	NA	NA
GCCGAGGCCGACGCGCCGGTCGGCGATCTCA	43	GTGAGATCGCCGACCGGCGCGTCGGCCTCGGCCTGCGGCGACGATTCGATCAGGCCGTCGCGGCCAAGGATGTCGGTC	78	0.0281750030356414	15.184783	1	-3.924554	F	NA	NA	NA	NA	NA	NA	NA	NA	NA	NA	NA	NA	NA	NA	NA	NA	NA	NA	F	NA	NA	NA	NA	NA	NA	NA	NA	NA	NA	NA	NA	NA	NA	NA	NA	NA	NA	NA
CGATGTGCACATATCCTGCGGCGACATCTTC	21	ACATGTCCGATGTGCACATATCCTGCGGCGACATCTTCGAACGCAAAGCGG	51	0.0405209865870739	6.26	1	-2.646163	F	NA	NA	NA	NA	NA	NA	NA	NA	NA	NA	NA	NA	NA	NA	NA	NA	NA	NA	F	NA	NA	NA	NA	NA	NA	NA	NA	NA	NA	NA	NA	NA	NA	NA	NA	NA	NA	NA
GCTCGAGATAGGCCGCGGCGTCGGCGCCGAC	85	CAAGCCGATCGACCGCCTCAGGGGCCAGATCCTCGACGATCTGCGCGAGGTCGGCGCCGACGCCGCGGCCTATCTCGAGCACATGGACCGCTCCCTGCGCTCCCGCCCGTTCCGC	115	0.00900958210993513	10.344348	1	-3.370771	F	NA	NA	NA	NA	NA	NA	NA	NA	NA	NA	NA	NA	NA	NA	NA	NA	NA	NA	F	NA	NA	NA	NA	NA	NA	NA	NA	NA	NA	NA	NA	NA	NA	NA	NA	NA	NA	NA
CGCGGTAGACGGTCGCGCGTCCGAGCCCGAC	1	CGCGGTAGACGGTCGCGCGTCCGAGCCCGAC	31	0.045956079435249	5.151739	21.372	2.052591	F	NA	NA	NA	NA	NA	NA	NA	NA	NA	NA	NA	NA	NA	NA	NA	NA	NA	NA	F	NA	NA	NA	NA	NA	NA	NA	NA	NA	NA	NA	NA	NA	NA	NA	NA	NA	NA	NA
GGCGCGGTCGAAAGACCGGAAAGCGAGCGAA	14	CGTCGAACGTCGGCGCGGTCGAAAGACCGGAAAGCGAGCGAACG	44	0.0202679513083856	1	6.458667	2.691236	F	NA	NA	NA	NA	NA	NA	NA	NA	NA	NA	NA	NA	NA	NA	NA	NA	NA	NA	F	NA	NA	NA	NA	NA	NA	NA	NA	NA	NA	NA	NA	NA	NA	NA	NA	NA	NA	NA
GCGACGAAGACCTGGTGCCCTACGAACGCCC	61	GCGATCGCAATGCGCAACGCCGGTTTCGAGACCTCGATCGGCTTGTTCGGCGACGAAGACCTGGTGCCCTACGAACGCCCGCAGCTTTCCAAGGAATTCCTGC	103	0.0047321561601052	37.016522	1	-5.210097	F	NA	NA	NA	NA	NA	NA	NA	NA	NA	NA	NA	NA	NA	NA	NA	NA	NA	NA	F	NA	NA	NA	NA	NA	NA	NA	NA	NA	NA	NA	NA	NA	NA	NA	NA	NA	NA	NA
CGTCTATGCCGATCGCACGCCCGATCCGCTC	2	CGAGCGGATCGGGCGTGCGATCGGCATAGACG	32	0.0189891637764933	8.516087	1.069333	-2.993479	F	NA	NA	NA	NA	NA	NA	NA	NA	NA	NA	NA	NA	NA	NA	NA	NA	NA	NA	F	NA	NA	NA	NA	NA	NA	NA	NA	NA	NA	NA	NA	NA	NA	NA	NA	NA	NA	NA
GTCGGATGCAGCCCCTCGCCGGCCTGCATCA	14	CGTGATGCAGGCCGGCGAGGGGCTGCATCCGACCAGCAAGGGCG	44	0.0448284288378651	22.352609	1.560333	-3.840517	F	NA	NA	NA	NA	NA	NA	NA	NA	NA	NA	NA	NA	NA	NA	NA	NA	NA	NA	F	NA	NA	NA	NA	NA	NA	NA	NA	NA	NA	NA	NA	NA	NA	NA	NA	NA	NA	NA
CGAATGGAATCATCGAATAACATTGAATGGA	17	GGAATATAATGGAATAATCGAATGCAATCGAATGGAATCATCGAATAACATTGAATGGAATC	62	0.032211850658326	88.280435	1	-6.464022	T	12705	chr16	34574011	34574056	NA	46M16S	0	0	0	1	16	0	T	F	0.741935483870968	0.978260869565217	2	1	F	NA	NA	NA	NA	NA	NA	NA	NA	NA	ENSG00000286968	+	FP325313.2	125146	ENSG00000279165	+	AC135776.4	367920	NA	NA
CGTCACGGGAACGGTGACCGATTTCTTGACC	6	CCAGCGGGTCAAGAAATCGGTCACCGTTCCCGTGACG	37	0.0224254682996495	12.639565	2.429	-2.379512	F	NA	NA	NA	NA	NA	NA	NA	NA	NA	NA	NA	NA	NA	NA	NA	NA	NA	NA	F	NA	NA	NA	NA	NA	NA	NA	NA	NA	NA	NA	NA	NA	NA	NA	NA	NA	NA	NA
CAATGAGCTCGTAGGCATCTGGTCACGTTCC	31	GACACTGGTCGCAACAAACAATGAGCTCGTAGGCATCTGGTCACGTTCCCGGAGAGGACAC	61	0.00877112095756257	1	9.25	3.209453	F	NA	NA	NA	NA	NA	NA	NA	NA	NA	NA	NA	NA	NA	NA	NA	NA	NA	NA	F	NA	NA	NA	NA	NA	NA	NA	NA	NA	NA	NA	NA	NA	NA	NA	NA	NA	NA	NA
CTGCGGTCAGCGAGGTCTTGCCATGGTCGAC	46	CGAGCGTAACAAGCCCCACTGCAACATCGGCACCATCGGTCACGTCGACCATGGCAAGACCTCGCTGACCGCAGCGATCAC	81	0.00388660348319158	32.616522	1.712	-4.251848	F	NA	NA	NA	NA	NA	NA	NA	NA	NA	NA	NA	NA	NA	NA	NA	NA	NA	NA	F	NA	NA	NA	NA	NA	NA	NA	NA	NA	NA	NA	NA	NA	NA	NA	NA	NA	NA	NA
CTCGAATGGAATAATCATTGAAGGGAATCGA	33	AGCAATCATTAAATGTACTCTAACGGAATCATCGAATGGACTCGAATGGAATAATCATTGAAGGGAATCGAATGGAA	77	0.0148446780110497	64.222174	1	-6.005	T	15762	chr1	125167823	125167875	NA	53M24S	0	0	0	1	24	0	T	F	0.688311688311688	0.981132075471698	16	1	F	NA	NA	NA	NA	NA	NA	NA	NA	NA	ENSG00000224857	-	LINC01691	3587300	ENSG00000276118	+	AC242852.1	18175304	NA	NA
CGCCGACGGGAAGCTGAGTGATGACCTTGGA	34	CCGTGTCCAAGGTCATCACTCAGCTTCCCGTCGGCGAGCGCGTCGGCATCGCATTCTCCGGAGG	64	0.0172370907623065	35.792174	1.083	-5.046539	F	NA	NA	NA	NA	NA	NA	NA	NA	NA	NA	NA	NA	NA	NA	NA	NA	NA	NA	F	NA	NA	NA	NA	NA	NA	NA	NA	NA	NA	NA	NA	NA	NA	NA	NA	NA	NA	NA
AGTCGGAAGCGACCAGGAAGATGATCGACTG	4	CTGCAGTCGATCATCTTCCTGGTCGCTTCCGACT	34	0.0352312934986655	1	5.400667	2.433138	T	6091	chr17	1040100	1040116	NA	5S17M12S	0	0	0	0	12	5	T	T	0.5	1	3	0	F	NA	ENSG00000159842	ABR	-	protein_coding	NA	NA	NA	NA	NA	NA	NA	NA	NA	NA	NA	NA	F	T
AGGTTAAGGCCGCCATGGACGACCTCAACCA	8	GAGGTTAAGGCCGCCATGGACGACCTCAACCAGAAGGC	38	0.031843847721283	99.665217	1	-6.639018	F	NA	NA	NA	NA	NA	NA	NA	NA	NA	NA	NA	NA	NA	NA	NA	NA	NA	NA	F	NA	NA	NA	NA	NA	NA	NA	NA	NA	NA	NA	NA	NA	NA	NA	NA	NA	NA	NA
AGGCGACGATCAGTAGCGGGTCTGAGAGGAT	14	GCCTACCAAGGCGACGATCAGTAGCGGGTCTGAGAGGATGATCC	44	0.0365120448883511	52.036522	1.215333	-5.420101	F	NA	NA	NA	NA	NA	NA	NA	NA	NA	NA	NA	NA	NA	NA	NA	NA	NA	NA	F	NA	NA	NA	NA	NA	NA	NA	NA	NA	NA	NA	NA	NA	NA	NA	NA	NA	NA	NA
AGGTTGTCTCGAATCTGATCGTTCATGTCGC	75	ATGCCGTAAAGCTGCACCAGGGCGACATGAACGATCAGATTCGAGACAACCTCGCGCAATCCGGAGATCGTCTCAGGCAGATCGTCATATGCGCAAGCGAACGCG	105	0	53.666087	2.451	-4.452568	F	NA	NA	NA	NA	NA	NA	NA	NA	NA	NA	NA	NA	NA	NA	NA	NA	NA	NA	F	NA	NA	NA	NA	NA	NA	NA	NA	NA	NA	NA	NA	NA	NA	NA	NA	NA	NA	NA
GCGCCGAAGCGCGTATCCTCTCGTCCCGCAC	2	AGCGCCGAAGCGCGTATCCTCTCGTCCCGCAC	32	0.0238601409081441	21.897826	1.895333	-3.530264	F	NA	NA	NA	NA	NA	NA	NA	NA	NA	NA	NA	NA	NA	NA	NA	NA	NA	NA	F	NA	NA	NA	NA	NA	NA	NA	NA	NA	NA	NA	NA	NA	NA	NA	NA	NA	NA	NA
AATGGTTACATCACTTGGGTGATCAGTGGCG	13	AAGCCTAGACAATGGTTACATCACTTGGGTGATCAGTGGCGAG	43	0.0308083346407	549.783478	65.078333	-3.078614	T	1621	chr10	133688664	133688706	NA	43M	0	0	0	1	0	0	F	F	1	0.976744186046512	2	1	F	NA	NA	NA	NA	NA	NA	NA	NA	NA	ENSG00000276164	+	DUX4L20	3729	ENSG00000237635	+	DUX4L29	51899	NA	NA
GTTTTGAATCTAGGCTCGAGAAGATCGGCAA	2	ATTGCCGATCTTCTCGAGCCTAGATTCAAAAC	32	0.0438560500593296	15.990435	2.020333	-2.984544	T	19896	chr5	159284601	159284617	NA	17M15S	0	0	0	0	15	0	T	F	0.53125	1	1	0	F	NA	ENSG00000164332	UBLCP1	+	protein_coding	NA	NA	NA	NA	NA	NA	NA	NA	NA	NA	NA	NA	F	T
CGCGGCCGCATCCAGCAGGAATTGAAGACGC	1	CGCGGCCGCATCCAGCAGGAATTGAAGACGC	31	0.0331523121681577	30.342174	1	-4.923253	F	NA	NA	NA	NA	NA	NA	NA	NA	NA	NA	NA	NA	NA	NA	NA	NA	NA	NA	F	NA	NA	NA	NA	NA	NA	NA	NA	NA	NA	NA	NA	NA	NA	NA	NA	NA	NA	NA
CGTTGGCGCCCGACGGCGCGTGGCGCGCCGC	2	GCGGCGCGCCACGCGCCGTCGGGCGCCAACGC	32	0.0482840026516089	19.844348	1	-4.310656	T	15363	chr14	105021082	105021101	NA	6S20M6S	0	0	0	1	6	6	T	T	0.625	0.95	1	1	F	NA	ENSG00000170779	CDCA4	-	protein_coding	NA	NA	NA	NA	NA	NA	NA	NA	NA	NA	NA	NA	T	F
CGTCATAGATGCCGAACTGCTGCGCCATTCC	8	GGAATGGCGCAGCAGTTCGGCATCTATGACGTCGATGCGCT	41	0.0415473299033807	17.646087	1.402667	-3.653104	F	NA	NA	NA	NA	NA	NA	NA	NA	NA	NA	NA	NA	NA	NA	NA	NA	NA	NA	F	NA	NA	NA	NA	NA	NA	NA	NA	NA	NA	NA	NA	NA	NA	NA	NA	NA	NA	NA
AGGAGTTCAAGCACTTCGGCATGAACCTCGA	18	GAGGAGTTCAAGCACTTCGGCATGAACCTCGAATTCCTGCTGCGCAAG	48	0.0358018152392955	1	7.067333	2.821166	F	NA	NA	NA	NA	NA	NA	NA	NA	NA	NA	NA	NA	NA	NA	NA	NA	NA	NA	F	NA	NA	NA	NA	NA	NA	NA	NA	NA	NA	NA	NA	NA	NA	NA	NA	NA	NA	NA
GTAGGCGTTGTTGGCGACCGCGTATTGTGCA	2	GTAGGCGTTGTTGGCGACCGCGTATTGTGCAC	32	0.0220189413114465	69.109565	2.243667	-4.944955	T	19447	chr18	39617085	39617100	NA	16S16M	0	0	0	0	0	16	F	T	0.5	1	1	0	F	NA	ENSG00000267374	MIR924HG	-	lncRNA	NA	NA	NA	NA	NA	NA	NA	NA	NA	NA	NA	NA	F	T
ATTGATATTTTGACTCAGGTCTCAGCAGTCA	5	GTGACTGCTGAGACCTGAGTCAAAATATCAATGCA	35	0.0458639105427468	102.615217	1	-6.681101	T	8376	chr1	180505885	180505902	NA	13S18M4S	0	0	0	0	4	13	T	T	0.514285714285714	1	1	0	F	NA	NA	NA	NA	NA	NA	NA	NA	NA	ENSG00000230124	-	ACBD6	2932	ENSG00000206905	-	RF00019	13113	NA	NA
CGACCGTCAACGGGCGTCCTTACGCTCCCCG	37	AGCAGATCAACATTGCGCGACACGCACCGCGTGTGGCCTTGCGACCGTCAACGGGCGTCCTTACGCTCCCCGCCC	75	0.0271897264931677	10.919565	1.048667	-3.380287	F	NA	NA	NA	NA	NA	NA	NA	NA	NA	NA	NA	NA	NA	NA	NA	NA	NA	NA	F	NA	NA	NA	NA	NA	NA	NA	NA	NA	NA	NA	NA	NA	NA	NA	NA	NA	NA	NA
ATGTCCATGACGCAGAAATACGCGCCGAACG	6	ATCGATGTCCATGACGCAGAAATACGCGCCGAACGG	36	0.0473634898477053	7.033478	1.24	-2.503898	F	NA	NA	NA	NA	NA	NA	NA	NA	NA	NA	NA	NA	NA	NA	NA	NA	NA	NA	F	NA	NA	NA	NA	NA	NA	NA	NA	NA	NA	NA	NA	NA	NA	NA	NA	NA	NA	NA
CCCAGGTGATCCGAACAGAGTGATGTCACAA	1	CCCAGGTGATCCGAACAGAGTGATGTCACAA	31	0.0331216111735431	78.241739	1	-6.289867	T	10479	GL000216.2	142545	142575	NA	31M	0	0	0	3	0	0	F	F	1	0.903225806451613	3	3	F	NA	NA	NA	NA	NA	NA	NA	NA	NA	NA	NA	NA	NA	NA	NA	NA	NA	NA	NA
AGCGCTCCGTAGCGGCAGGCGGGAAAGCAAA	41	TCTGGTGTACTCTAAAAGACCACATTTGCTTTCCCGCCTGCCGCTACGGAGCGCTATCGGAGAACGGGGTG	71	0.020682387640803	1	5.802667	2.536716	F	NA	NA	NA	NA	NA	NA	NA	NA	NA	NA	NA	NA	NA	NA	NA	NA	NA	NA	F	NA	NA	NA	NA	NA	NA	NA	NA	NA	NA	NA	NA	NA	NA	NA	NA	NA	NA	NA
CGACGGCGAGAGTGAGCGAACACAGAGCCAG	27	AAACGACGGCGAGAGTGAGCGAACACAGAGCCAGCGCCAAAACACGAAGCGACCGGCGAT	60	0.0202679513083856	1.04087	17.932	4.106675	F	NA	NA	NA	NA	NA	NA	NA	NA	NA	NA	NA	NA	NA	NA	NA	NA	NA	NA	F	NA	NA	NA	NA	NA	NA	NA	NA	NA	NA	NA	NA	NA	NA	NA	NA	NA	NA	NA
CCCGCGATCACCAAGATCTTCCATTTCGCGC	16	CCCGCGATCACCAAGATCTTCCATTTCGCGCGGTTCGATGTCGCGG	46	0.0329088655335081	1	8.018667	3.003362	F	NA	NA	NA	NA	NA	NA	NA	NA	NA	NA	NA	NA	NA	NA	NA	NA	NA	NA	F	NA	NA	NA	NA	NA	NA	NA	NA	NA	NA	NA	NA	NA	NA	NA	NA	NA	NA	NA
GCTGCGCAAGACAGCGTCGCGAAAGGGTCCA	27	AGAGCGCTGCGCAAGACAGCGTCGCGAAAGGGTCCATTGTAGGTGCAGCAATCGCTC	57	0.0331216111735431	1	7.460667	2.899305	F	NA	NA	NA	NA	NA	NA	NA	NA	NA	NA	NA	NA	NA	NA	NA	NA	NA	NA	F	NA	NA	NA	NA	NA	NA	NA	NA	NA	NA	NA	NA	NA	NA	NA	NA	NA	NA	NA
ACGCGGATCGGCGCCATCCATTCGGTGGTCT	15	AAGACCACCGAATGGATGGCGCCGATCCGCGTGCAGGCCAGCATC	45	0.0427215152114095	19.706522	1.741333	-3.500409	F	NA	NA	NA	NA	NA	NA	NA	NA	NA	NA	NA	NA	NA	NA	NA	NA	NA	NA	F	NA	NA	NA	NA	NA	NA	NA	NA	NA	NA	NA	NA	NA	NA	NA	NA	NA	NA	NA
CGCCCGCGTCGGCGCCGCGAATTGCGCCGGC	9	CGCCAGCCGGCGCAATTCGCGGCGCCGACGCGGGCGGCG	39	0.0483503983672428	20.432174	1	-4.352771	F	NA	NA	NA	NA	NA	NA	NA	NA	NA	NA	NA	NA	NA	NA	NA	NA	NA	NA	F	NA	NA	NA	NA	NA	NA	NA	NA	NA	NA	NA	NA	NA	NA	NA	NA	NA	NA	NA
AGTATATAATACATATTTTGGGTACTTTTAT	6	ATAAAAGTACCCAAAATATGTATTATATACTGTACATAAAATGTGA	46	0.034353307875895	85.016087	1.028	-6.369824	T	6103	KI270337.1	907	952	NA	46M	0	0	0	4	0	0	F	F	1	0.91304347826087	1	4	F	NA	NA	NA	NA	NA	NA	NA	NA	NA	NA	NA	NA	NA	NA	NA	NA	NA	NA	NA
AACAACGTGCCGCCGGAGACCCGGCGCAAGC	4	AAGAACAACGTGCCGCCGGAGACCCGGCGCAAGC	34	0.0318776644814443	15.352609	2.261333	-2.763238	T	462	chr10	123148098	123148115	NA	11S18M5S	0	0	0	0	5	11	T	T	0.529411764705882	1	1	0	F	NA	NA	NA	NA	NA	NA	NA	NA	NA	ENSG00000188620	+	HMX3	8676	ENSG00000188816	+	HMX2	6	NA	NA
CGACGCAACACCGTGGCGGCAGATCGGGCAG	5	CGACGCAACACCGTGGCGGCAGATCGGGCAGCTAT	35	0.0465832256012588	79.437391	2.177333	-5.189184	F	NA	NA	NA	NA	NA	NA	NA	NA	NA	NA	NA	NA	NA	NA	NA	NA	NA	NA	F	NA	NA	NA	NA	NA	NA	NA	NA	NA	NA	NA	NA	NA	NA	NA	NA	NA	NA	NA
AAAATCTCGAAGGAGAAGCGCTGTGGCGAAG	17	TTTACGTCGAAAATCTCGAAGGAGAAGCGCTGTGGCGAAGGAAAAGA	47	0.0145412663215052	22.825217	1.764	-3.693706	F	NA	NA	NA	NA	NA	NA	NA	NA	NA	NA	NA	NA	NA	NA	NA	NA	NA	NA	F	NA	NA	NA	NA	NA	NA	NA	NA	NA	NA	NA	NA	NA	NA	NA	NA	NA	NA	NA
ATGTCGGGTGAAACCGCGACCGATGAGCGTG	12	AATACGTTCATGTCGGGTGAAACCGCGACCGATGAGCGTGGC	42	0.0444875448022693	23.255652	1.689	-3.78334	F	NA	NA	NA	NA	NA	NA	NA	NA	NA	NA	NA	NA	NA	NA	NA	NA	NA	NA	F	NA	NA	NA	NA	NA	NA	NA	NA	NA	NA	NA	NA	NA	NA	NA	NA	NA	NA	NA
CATGTCGGCGCGCGTTGCCGTGCAGTTGCAG	10	CGGCAGCGAGGTGATGCCGGCCTGCAACTGCACGGCAACGCGCGCCGACATGA	53	0.0246915517805618	33.537391	1.748	-4.261993	F	NA	NA	NA	NA	NA	NA	NA	NA	NA	NA	NA	NA	NA	NA	NA	NA	NA	NA	F	NA	NA	NA	NA	NA	NA	NA	NA	NA	NA	NA	NA	NA	NA	NA	NA	NA	NA	NA
CCGTGCTGATCCTTCCCGTCGTGCGGATCGA	8	ACCGTGCTGATCCTTCCCGTCGTGCGGATCGAACGAAC	38	0.0406594212481737	11.650435	1.248667	-3.221923	F	NA	NA	NA	NA	NA	NA	NA	NA	NA	NA	NA	NA	NA	NA	NA	NA	NA	NA	F	NA	NA	NA	NA	NA	NA	NA	NA	NA	NA	NA	NA	NA	NA	NA	NA	NA	NA	NA
CAGGGCCGCTTCGCCGGCGTGATCGGCGAGC	31	CGAGGCTCGCCGATCACGCCGGCGAAGCGGCCCTGGGTGTTCTGCGTCACCAGCTCGCGCA	61	0.0396087616810092	31.529565	1	-4.978633	F	NA	NA	NA	NA	NA	NA	NA	NA	NA	NA	NA	NA	NA	NA	NA	NA	NA	NA	F	NA	NA	NA	NA	NA	NA	NA	NA	NA	NA	NA	NA	NA	NA	NA	NA	NA	NA	NA
CCGGGTGCGTCTGGAATGCAACCCCGAGATC	5	CTCCCCGGGTGCGTCTGGAATGCAACCCCGAGATC	35	0.0349398476708779	27.264348	4.080333	-2.740257	F	NA	NA	NA	NA	NA	NA	NA	NA	NA	NA	NA	NA	NA	NA	NA	NA	NA	NA	F	NA	NA	NA	NA	NA	NA	NA	NA	NA	NA	NA	NA	NA	NA	NA	NA	NA	NA	NA
CAGCACCTCTTGAAGTATCCACGAAGGCTGC	8	ACCAGCACCTCTTGAAGTATCCACGAAGGCTGCCCGAG	38	0.0336938577326885	51.772174	1.260667	-5.359918	F	NA	NA	NA	NA	NA	NA	NA	NA	NA	NA	NA	NA	NA	NA	NA	NA	NA	NA	F	NA	NA	NA	NA	NA	NA	NA	NA	NA	NA	NA	NA	NA	NA	NA	NA	NA	NA	NA
AACATGCTCCGTGAGGCTTGGAGCGTGAAAA	6	CGGAACATGCTCCGTGAGGCTTGGAGCGTGAAAAAA	36	0.0174555956975641	1	10.443	3.384464	F	NA	NA	NA	NA	NA	NA	NA	NA	NA	NA	NA	NA	NA	NA	NA	NA	NA	NA	F	NA	NA	NA	NA	NA	NA	NA	NA	NA	NA	NA	NA	NA	NA	NA	NA	NA	NA	NA
CTTCCGCGCTGCAACAGTGCGAGCGGCAGCA	5	CCAACTTCCGCGCTGCAACAGTGCGAGCGGCAGCA	35	0.0475308690407647	2.14087	12.283	2.520394	F	NA	NA	NA	NA	NA	NA	NA	NA	NA	NA	NA	NA	NA	NA	NA	NA	NA	NA	F	NA	NA	NA	NA	NA	NA	NA	NA	NA	NA	NA	NA	NA	NA	NA	NA	NA	NA	NA
AGGTAACACTGACTGGAGGACCGAACCGACT	1	AGGTAACACTGACTGGAGGACCGAACCGACT	31	0.0390487647592898	1	4.351	2.121347	T	5879	chr19	935025	935040	NA	15S16M	0	0	0	0	0	15	F	T	0.516129032258065	1	1	0	F	NA	ENSG00000116017	ARID3A	+	protein_coding	NA	NA	NA	NA	NA	NA	NA	NA	NA	NA	NA	NA	F	T
AGTCACAGACCCATTATGCAAGAGGTACGCG	1	AGTCACAGACCCATTATGCAAGAGGTACGCG	31	0.0390487647592898	1	28.402	4.827921	F	NA	NA	NA	NA	NA	NA	NA	NA	NA	NA	NA	NA	NA	NA	NA	NA	NA	NA	F	NA	NA	NA	NA	NA	NA	NA	NA	NA	NA	NA	NA	NA	NA	NA	NA	NA	NA	NA
ACGCAGGCGCCGACTGAGCCGCTCCTCCTCC	5	GTCACGCAGGCGCCGACTGAGCCGCTCCTCCTCCT	35	0.0429894820515766	17.261739	1	-4.109506	T	2877	chr16	57771246	57771280	NA	35M	0	0	0	1	0	0	F	F	1	0.971428571428571	1	1	F	NA	ENSG00000140859	KIFC3	-	protein_coding	NA	NA	NA	NA	NA	NA	NA	NA	NA	NA	NA	NA	T	F
CGAGGCCGTCAGCAGTGGGACCATCCGCATC	1	CGAGGCCGTCAGCAGTGGGACCATCCGCATC	31	0.0422053953046062	10.379565	1.930333	-2.426824	T	13192	chr7	57619252	57619268	NA	14S17M	0	0	0	1	0	14	F	T	0.548387096774194	0.941176470588235	2	1	F	NA	NA	NA	NA	NA	NA	NA	NA	NA	ENSG00000233601	+	NCOR1P3	9149	ENSG00000243981	-	AC064862.6	9210	NA	NA
AAGCAGAGGCCGGCGAGCAGGAACACCAGGC	13	CAGAGACCTTGAAGCAGAGGCCGGCGAGCAGGAACACCAGGCC	43	0.0239770155096968	25.256087	1	-4.658559	F	NA	NA	NA	NA	NA	NA	NA	NA	NA	NA	NA	NA	NA	NA	NA	NA	NA	NA	F	NA	NA	NA	NA	NA	NA	NA	NA	NA	NA	NA	NA	NA	NA	NA	NA	NA	NA	NA
AGGCACGCCCGCGCAACCCGCCAGAGGGGCC	20	TCGCGATGAGGCACGCCCGCGCAACCCGCCAGAGGGGCCCGCAGCCGATG	50	0.0407883127318832	6.923478	1	-2.791497	F	NA	NA	NA	NA	NA	NA	NA	NA	NA	NA	NA	NA	NA	NA	NA	NA	NA	NA	F	NA	NA	NA	NA	NA	NA	NA	NA	NA	NA	NA	NA	NA	NA	NA	NA	NA	NA	NA
GGTACCTTGATATTTTATGTACAGTATATAC	35	TACTGTACATAAAGTATCAAAGTACCCAAACTGTGTAGTATATACTGTACATAAAATATCAAGGTACC	68	0.0396087616810092	319.629565	16.040667	-4.316595	T	19306	KI270466.1	943	1010	NA	68M	0	0	0	2	0	0	F	F	1	0.970588235294118	1	2	F	NA	NA	NA	NA	NA	NA	NA	NA	NA	NA	NA	NA	NA	NA	NA	NA	NA	NA	NA
CGCCGCGGATCGTATCGGCAATGAGTGCAAG	20	CCCTGGCAACGACGCCGCGGATCGTATCGGCAATGAGTGCAAGCTCGGCG	50	0.0198412538251592	1.180435	10.421333	3.142149	F	NA	NA	NA	NA	NA	NA	NA	NA	NA	NA	NA	NA	NA	NA	NA	NA	NA	NA	F	NA	NA	NA	NA	NA	NA	NA	NA	NA	NA	NA	NA	NA	NA	NA	NA	NA	NA	NA
GGTCGATGCCTCGGGCCTCGTGGTCACCAAC	4	TGGTCGATGCCTCGGGCCTCGTGGTCACCAACAATCA	37	0.0312292652498203	1	7.001	2.807561	T	19329	chr3	186497134	186497151	NA	12S18M7S	0	0	0	0	7	12	T	T	0.486486486486487	1	1	0	F	NA	NA	NA	NA	NA	NA	NA	NA	NA	ENSG00000224406	-	LINC02052	3474	ENSG00000213139	-	CRYGS	41289	NA	NA
AGCGTGTAGCCGTCGGGCGCGCTGCGGGCGA	12	TCAGCAGCGTGTAGCCGTCGGGCGCGCTGCGGGCGACTTCCT	42	0.0404356632332053	1.07913	6.746	2.644164	F	NA	NA	NA	NA	NA	NA	NA	NA	NA	NA	NA	NA	NA	NA	NA	NA	NA	NA	F	NA	NA	NA	NA	NA	NA	NA	NA	NA	NA	NA	NA	NA	NA	NA	NA	NA	NA	NA
CTTTCGTGCCCTCATCGCCGACATGAATGCC	19	CTCGCCGACAAAGCCTATGACAGCAATGCCTTTCGTGCCCTCATCGCCGACATGAATGCC	60	0.0162404960327055	26.367391	2.355667	-3.484547	F	NA	NA	NA	NA	NA	NA	NA	NA	NA	NA	NA	NA	NA	NA	NA	NA	NA	NA	F	NA	NA	NA	NA	NA	NA	NA	NA	NA	NA	NA	NA	NA	NA	NA	NA	NA	NA	NA
ACCTTTCCTTTGTGACTTCAAGAGCCTCTGG	20	GCAGGATTTCTTCACACCTTTCCTTTGTGACTTCAAGAGCCTCTGGCATC	50	0.0111507583001328	1.180435	21.006667	4.153457	T	2692	GL000255.2	2524523	2524572	NA	50M	0	0	0	0	0	0	F	F	1	1	2	0	F	NA	NA	NA	NA	NA	NA	NA	NA	NA	NA	NA	NA	NA	NA	NA	NA	NA	NA	NA
GGCTACTACTACGCGCCCGACGGGCGCATCA	1	GGCTACTACTACGCGCCCGACGGGCGCATCA	31	0.0356100099460003	11.83913	1.715	-2.787283	F	NA	NA	NA	NA	NA	NA	NA	NA	NA	NA	NA	NA	NA	NA	NA	NA	NA	NA	F	NA	NA	NA	NA	NA	NA	NA	NA	NA	NA	NA	NA	NA	NA	NA	NA	NA	NA	NA
ACGAAATCCTCAAAGCTATCCAGATATCCGC	24	AACGAAATCCTCAAAGCTATCCAGATATCCGCATGCAGAATCTTCAAAAAGAGT	54	0.0342390909041762	70.218696	1	-6.133783	T	2905	chr8	43970653	43970706	NA	54M	0	0	0	1	0	0	F	F	1	0.981481481481482	679	1	F	NA	NA	NA	NA	NA	NA	NA	NA	NA	ENSG00000253198	-	AC139365.1	296063	ENSG00000276685	-	RF01518	2058097	NA	NA
ATGGAATGGAATGGAATGGAATGGGATTAAC	1	ATGGAATGGAATGGAATGGAATGGGATTAAC	31	0.049040091370479	77.192609	7.608333	-3.34281	T	7977	chr10	41886792	41886822	NA	31M	0	0	0	3	0	0	F	F	1	0.903225806451613	1	3	F	NA	NA	NA	NA	NA	NA	NA	NA	NA	ENSG00000233832	+	AL590623.1	3103685	ENSG00000229485	-	KSR1P1	262487	NA	NA
GGTTGAGCTTCCTGATCAACACCGCCAAGAC	4	GGGGGTTGAGCTTCCTGATCAACACCGCCAAGAC	34	0.030404130224206	1	7.421667	2.891743	F	NA	NA	NA	NA	NA	NA	NA	NA	NA	NA	NA	NA	NA	NA	NA	NA	NA	NA	F	NA	NA	NA	NA	NA	NA	NA	NA	NA	NA	NA	NA	NA	NA	NA	NA	NA	NA	NA
CGGGCGCGGCAGTTGCCCGAGAGCACTGATC	21	ATCCTCCCAGATCAGTGCTCTCGGGCAACTGCCGCGCCCGTATGCCGCACG	51	0.0275175611841625	1	10.768667	3.428768	F	NA	NA	NA	NA	NA	NA	NA	NA	NA	NA	NA	NA	NA	NA	NA	NA	NA	NA	F	NA	NA	NA	NA	NA	NA	NA	NA	NA	NA	NA	NA	NA	NA	NA	NA	NA	NA	NA
AAGCGGACGCGCGGGCACTTAGTCTCGTAAG	6	AAGCGGACGCGCGGGCACTTAGTCTCGTAAGTTCTAATCCCACAGGGA	48	0.0425011744484476	4.544783	14.689667	1.692518	F	NA	NA	NA	NA	NA	NA	NA	NA	NA	NA	NA	NA	NA	NA	NA	NA	NA	NA	F	NA	NA	NA	NA	NA	NA	NA	NA	NA	NA	NA	NA	NA	NA	NA	NA	NA	NA	NA
CCTGGTTGGCATCCGTGCTGTAACCCGGCCG	3	ACGGCCGGGTTACAGCACGGATGCCAACCAGGC	33	0.0329767601780464	7.092174	1	-2.826228	T	12168	chr3	55809731	55809749	NA	19M14S	0	0	0	2	14	0	T	F	0.575757575757576	0.894736842105263	1	2	F	NA	ENSG00000187672	ERC2	-	protein_coding	NA	NA	NA	NA	NA	NA	NA	NA	NA	NA	NA	NA	F	T
AGATGACCCCGTCCGCCGGAATACGGTCCCC	18	CGGGGACCGTATTCCGGCGGACGGGGTCATCTTATCCGGAGAGAGCAC	48	0.0384251544867523	1	8.438333	3.076958	F	NA	NA	NA	NA	NA	NA	NA	NA	NA	NA	NA	NA	NA	NA	NA	NA	NA	NA	F	NA	NA	NA	NA	NA	NA	NA	NA	NA	NA	NA	NA	NA	NA	NA	NA	NA	NA	NA
GCACGGTATCGAGGATCGATTGCAGCAGAGC	25	GGCACGGTATCGAGGATCGATTGCAGCAGAGCAGTTCTCGCACGCACCCGCTCGT	55	0.0239770155096968	65.085652	1.370667	-5.56939	F	NA	NA	NA	NA	NA	NA	NA	NA	NA	NA	NA	NA	NA	NA	NA	NA	NA	NA	F	NA	NA	NA	NA	NA	NA	NA	NA	NA	NA	NA	NA	NA	NA	NA	NA	NA	NA	NA
ATCACGCCATTCGAAGCTCCCGCCTTGACGG	1	ATCACGCCATTCGAAGCTCCCGCCTTGACGG	31	0.037818143091182	2.176522	14.708	2.756505	F	NA	NA	NA	NA	NA	NA	NA	NA	NA	NA	NA	NA	NA	NA	NA	NA	NA	NA	F	NA	NA	NA	NA	NA	NA	NA	NA	NA	NA	NA	NA	NA	NA	NA	NA	NA	NA	NA
CGACGACCCGGCGGATCAGCTCGCCCATGTC	42	CGACACCCTGATCCCGGACAATCCGAACAAGCCCTACGACATGGGCGAGCTGATCCGCCGGGTCGTCGACGA	72	0.0390244542041138	8.740435	1.055667	-3.04955	F	NA	NA	NA	NA	NA	NA	NA	NA	NA	NA	NA	NA	NA	NA	NA	NA	NA	NA	F	NA	NA	NA	NA	NA	NA	NA	NA	NA	NA	NA	NA	NA	NA	NA	NA	NA	NA	NA
GCATCTTGATCGGCGCCTTGAACATCTCGAC	5	AGCATCTTGATCGGCGCCTTGAACATCTCGACGAA	35	0.0160690765383585	35.137826	1.318333	-4.736238	F	NA	NA	NA	NA	NA	NA	NA	NA	NA	NA	NA	NA	NA	NA	NA	NA	NA	NA	F	NA	NA	NA	NA	NA	NA	NA	NA	NA	NA	NA	NA	NA	NA	NA	NA	NA	NA	NA
TACGCTAAGCACTCCTCTTAACCTTCCAGCA	3	TTACGCTAAGCACTCCTCTTAACCTTCCAGCAC	33	0.0429285397443397	38.655217	1	-5.272591	F	NA	NA	NA	NA	NA	NA	NA	NA	NA	NA	NA	NA	NA	NA	NA	NA	NA	NA	F	NA	NA	NA	NA	NA	NA	NA	NA	NA	NA	NA	NA	NA	NA	NA	NA	NA	NA	NA
AGATCACGCCGAAGGGCGAGAGCCCGATGAC	3	GCAAGATCACGCCGAAGGGCGAGAGCCCGATGAC	34	0.0498735139711201	40.240435	1.090333	-5.205805	T	4296	chr5	115179690	115179709	NA	6S20M8S	0	0	0	0	8	6	T	T	0.588235294117647	1	1	0	F	NA	ENSG00000152503	TRIM36	-	protein_coding	NA	NA	NA	NA	NA	NA	NA	NA	NA	NA	NA	NA	F	T
TGAAACAGCCCACACGCGGCAAACCAGGCAA	5	TTATGAAACAGCCCACACGCGGCAAACCAGGCAAT	35	0.0297786630894571	1	7.548333	2.916158	F	NA	NA	NA	NA	NA	NA	NA	NA	NA	NA	NA	NA	NA	NA	NA	NA	NA	NA	F	NA	NA	NA	NA	NA	NA	NA	NA	NA	NA	NA	NA	NA	NA	NA	NA	NA	NA	NA
CCGAGGCCACCAGGGAAGACGCGCCGGTTTC	10	GAAACCGGCGCGTCTTCCCTGGTGGCCTCGGCCCCATCGA	40	0.0195418635070771	23.587391	2.270333	-3.37704	F	NA	NA	NA	NA	NA	NA	NA	NA	NA	NA	NA	NA	NA	NA	NA	NA	NA	NA	F	NA	NA	NA	NA	NA	NA	NA	NA	NA	NA	NA	NA	NA	NA	NA	NA	NA	NA	NA
AGTCATACATCGCCTGGGGCGGCGTGCAGGA	6	GTCGAAGTCATACATCGCCTGGGGCGGCGTGCAGGA	36	0.00628985007746395	10.384783	1.048667	-3.307843	F	NA	NA	NA	NA	NA	NA	NA	NA	NA	NA	NA	NA	NA	NA	NA	NA	NA	NA	F	NA	NA	NA	NA	NA	NA	NA	NA	NA	NA	NA	NA	NA	NA	NA	NA	NA	NA	NA
CGGGCGGCTCGATCTTGATGACGTCGGCGCC	48	CCACCGTGCTGTCCGATTTCGGCGCCGACGTCATCAAGATCGAGCCGCCCGGCGCCGGCGATCCCTATCGGAACCTGCCC	80	0.00601971269054639	63.572609	1.252667	-5.66533	F	NA	NA	NA	NA	NA	NA	NA	NA	NA	NA	NA	NA	NA	NA	NA	NA	NA	NA	F	NA	NA	NA	NA	NA	NA	NA	NA	NA	NA	NA	NA	NA	NA	NA	NA	NA	NA	NA
GGCACTGTTGCTGAGGCCGCTCCCACGGCGA	1	GGCACTGTTGCTGAGGCCGCTCCCACGGCGA	31	0.0487178913302459	58.669565	1.026	-5.83751	T	18926	chr3	52598993	52599009	NA	14S17M	0	0	0	0	0	14	F	T	0.548387096774194	1	1	0	F	NA	ENSG00000163939	PBRM1	-	protein_coding	NA	NA	NA	NA	NA	NA	NA	NA	NA	NA	NA	NA	F	T
GAAGCCACCGAAGCTCAGCACCGCGTACGAC	15	CGAGGAAGCCACCGAAGCTCAGCACCGCGTACGACACCTTGCCCG	45	0.0258072252753677	11.095217	1	-3.471866	F	NA	NA	NA	NA	NA	NA	NA	NA	NA	NA	NA	NA	NA	NA	NA	NA	NA	NA	F	NA	NA	NA	NA	NA	NA	NA	NA	NA	NA	NA	NA	NA	NA	NA	NA	NA	NA	NA
GTGCGCTCTCGACCGACAGCGAACGCGCCGA	11	TGAATTCGGCGCGTTCGCTGTCGGTCGAGAGCGCACGGCTG	41	0.00169152547153182	15.285217	1	-3.934065	F	NA	NA	NA	NA	NA	NA	NA	NA	NA	NA	NA	NA	NA	NA	NA	NA	NA	NA	F	NA	NA	NA	NA	NA	NA	NA	NA	NA	NA	NA	NA	NA	NA	NA	NA	NA	NA	NA
ACTTCCTGGCCGACGAATTCAACGTCTCGAT	46	AAGGTGGTCGGCATGGCCGGCGTGCTCGACTCCGCGCGCTTCCGTTACTTCCTGGCCGACGAATTCAACGTCTCGATCGAGGACGTCACCGC	92	0.0102635057903666	40.774783	1	-5.349605	F	NA	NA	NA	NA	NA	NA	NA	NA	NA	NA	NA	NA	NA	NA	NA	NA	NA	NA	F	NA	NA	NA	NA	NA	NA	NA	NA	NA	NA	NA	NA	NA	NA	NA	NA	NA	NA	NA
ATTCCAATGAAGGGGTCAGCTGCGCGGTCCG	8	CAGCCGGCATGGATTCCAATGAAGGGGTCAGCTGCGCGGTCCG	43	0.0387608729236524	7.526087	1	-2.9119	F	NA	NA	NA	NA	NA	NA	NA	NA	NA	NA	NA	NA	NA	NA	NA	NA	NA	NA	F	NA	NA	NA	NA	NA	NA	NA	NA	NA	NA	NA	NA	NA	NA	NA	NA	NA	NA	NA
TCATTCTATGGTTCCACAGGTTTCCATTCGA	4	TCATTCTATGGTTCCACAGGTTTCCATTCGATGA	34	0.0457209895818048	1041.088261	50.601	-4.362783	T	20218	chr7	62350348	62350381	NA	34M	0	0	0	1	0	0	F	F	1	0.970588235294118	1	1	F	NA	NA	NA	NA	NA	NA	NA	NA	NA	ENSG00000233918	-	AC128676.1	74671	ENSG00000207443	-	RNU6-417P	661081	NA	NA
AGCACGACGTCGAACACGGCCGTGTAGTGGC	13	GCCACTACACGGCCGTGTTCGACGTCGTGCTGGCGAGCTAGCA	43	0.0412126915036293	1	5.281	2.400811	F	NA	NA	NA	NA	NA	NA	NA	NA	NA	NA	NA	NA	NA	NA	NA	NA	NA	NA	F	NA	NA	NA	NA	NA	NA	NA	NA	NA	NA	NA	NA	NA	NA	NA	NA	NA	NA	NA
AAGTAAAACCGCTAAAGCGAAGGCGGTTGCC	3	GAAAGTAAAACCGCTAAAGCGAAGGCGGTTGCC	33	0.0361647356739504	11.391739	1	-3.509916	T	1210	chr4	3338443	3338458	NA	17S16M	0	0	0	1	0	17	F	T	0.484848484848485	0.9375	1	1	F	NA	ENSG00000159788	RGS12	+	protein_coding	NA	NA	NA	NA	NA	NA	NA	NA	NA	NA	NA	NA	F	T
CGCGGCCAGAAAGGCGGCCGCCCCCTCGCCC	4	GCGCGGCCAGAAAGGCGGCCGCCCCCTCGCCCGTCA	36	0.047999652493561	1.47087	6.209667	2.077846	T	14118	KI270733.1	135109	135144	NA	36M	0	0	0	1	0	0	F	F	1	0.972222222222222	1	1	F	NA	NA	NA	NA	NA	NA	NA	NA	NA	NA	NA	NA	NA	NA	NA	NA	NA	NA	NA
AACATCGGCGCGGCCGGCGGGCAAGCCGATT	2	AACATCGGCGCGGCCGGCGGGCAAGCCGATTC	32	0.0441247021731663	23.792609	3.359333	-2.824267	T	524	chrX	21941128	21941145	NA	9S18M5S	0	0	0	0	5	9	T	T	0.5625	1	1	0	F	NA	ENSG00000102172	SMS	+	protein_coding	NA	NA	NA	NA	NA	NA	NA	NA	NA	NA	NA	NA	T	F
AACCACGATCCTGAGCGCTTCGATGAGTTCG	2	GAACCACGATCCTGAGCGCTTCGATGAGTTCG	32	0.0335421485096986	53.486087	1	-5.741092	F	NA	NA	NA	NA	NA	NA	NA	NA	NA	NA	NA	NA	NA	NA	NA	NA	NA	NA	F	NA	NA	NA	NA	NA	NA	NA	NA	NA	NA	NA	NA	NA	NA	NA	NA	NA	NA	NA
ATCGGTTGGGAGAAGCCGACCTTGTTGCCCG	1	ATCGGTTGGGAGAAGCCGACCTTGTTGCCCG	31	0.0324611987497759	7.539565	1	-2.914481	T	7291	chr19	48498511	48498526	NA	8S16M7S	0	0	0	0	7	8	T	T	0.516129032258065	1	1	0	F	NA	ENSG00000142235	LMTK3	-	protein_coding	NA	NA	NA	NA	NA	NA	NA	NA	NA	NA	NA	NA	T	F
CCGGCACTGCCCGGATACGCGATCGTGCCAG	1	CCGGCACTGCCCGGATACGCGATCGTGCCAG	31	0.0339044827121627	1	5.162	2.36793	F	NA	NA	NA	NA	NA	NA	NA	NA	NA	NA	NA	NA	NA	NA	NA	NA	NA	NA	F	NA	NA	NA	NA	NA	NA	NA	NA	NA	NA	NA	NA	NA	NA	NA	NA	NA	NA	NA
AACTTCGATGCGGCGAGCGAGCCGGCCAATG	7	ATATGCAACTTCGATGCGGCGAGCGAGCCGGCCAATG	37	0.037321171114563	25.904783	2.551333	-3.343895	F	NA	NA	NA	NA	NA	NA	NA	NA	NA	NA	NA	NA	NA	NA	NA	NA	NA	NA	F	NA	NA	NA	NA	NA	NA	NA	NA	NA	NA	NA	NA	NA	NA	NA	NA	NA	NA	NA
AAGAGTGTAGGCTAGGGTGTAGATGTGTGCT	3	AGAGCACACATCTACACCCTAGCCTACACTCTT	33	0.0294316260371882	34.707826	1.224	-4.825586	T	949	chr2	78688360	78688376	NA	17M16S	0	0	0	0	16	0	T	F	0.515151515151515	1	1	0	F	NA	NA	NA	NA	NA	NA	NA	NA	NA	ENSG00000234877	+	AC092660.1	88955	ENSG00000286260	-	AC092604.1	192336	NA	NA
GCGCGAACGGCTGCCGTGGTCCGGCCACAGC	54	CCTCCGGTGGTCGAGATGCTCGATACGCGCGAACGGCTGCCGTGGTCCGGCCACAGCGCGCGCCACGCGCTGCCCGAGGTCTATGAGCTGATCAAGCGCAA	101	0.00939060452599388	12.870435	1.402667	-3.197816	F	NA	NA	NA	NA	NA	NA	NA	NA	NA	NA	NA	NA	NA	NA	NA	NA	NA	NA	F	NA	NA	NA	NA	NA	NA	NA	NA	NA	NA	NA	NA	NA	NA	NA	NA	NA	NA	NA
GCGGCGACGGCGCCGCGATCCAGACCGGCGA	28	GAAAGGACGTCGTTGCCCTCGCCGGTCTGGATCGCGGCGCCGTCGCCGCGGATGAAGC	58	0.0114740462771458	65.336087	1	-6.029808	F	NA	NA	NA	NA	NA	NA	NA	NA	NA	NA	NA	NA	NA	NA	NA	NA	NA	NA	F	NA	NA	NA	NA	NA	NA	NA	NA	NA	NA	NA	NA	NA	NA	NA	NA	NA	NA	NA
GCGGGCGCCCTCATAGGCCTCCGTCGCCGCA	5	CGCGGGCGCCCTCATAGGCCTCCGTCGCCGCATTG	35	0.0485914997685725	7.810435	1	-2.965403	F	NA	NA	NA	NA	NA	NA	NA	NA	NA	NA	NA	NA	NA	NA	NA	NA	NA	NA	F	NA	NA	NA	NA	NA	NA	NA	NA	NA	NA	NA	NA	NA	NA	NA	NA	NA	NA	NA
CGAGCCGGCGCTGAAGCTGGCGTTGATCGAA	7	CCGAGCCGGCGCTGAAGCTGGCGTTGATCGAATCGCT	37	0.0234159803707449	1	12.015333	3.586805	T	13012	chr1	231421307	231421325	NA	14S19M4S	0	0	0	0	4	14	T	T	0.513513513513513	1	1	0	F	NA	ENSG00000135766	EGLN1	-	protein_coding	NA	NA	NA	NA	NA	NA	NA	NA	NA	NA	NA	NA	T	F
CGGGTTCTTTGCAGAGGTAGGGAGGGTCTTA	2	TAAGACCCTCCCTACCTCTGCAAAGAACCCGG	32	0.0251790717201166	69.893913	1	-6.127095	T	14895	chr9	2747629	2747646	NA	4S18M10S	0	0	0	0	10	4	T	T	0.5625	1	1	0	F	NA	ENSG00000080608	PUM3	-	protein_coding	NA	NA	NA	NA	NA	NA	NA	NA	NA	NA	NA	NA	F	T
TGCGGACCGCGGGCGAGGCACGAAAGGCAAA	10	GCTAGTTTGCCTTTCGTGCCTCGCCCGCGGTCCGCACCAG	40	0.00628985007746395	38.598261	1.687667	-4.515434	F	NA	NA	NA	NA	NA	NA	NA	NA	NA	NA	NA	NA	NA	NA	NA	NA	NA	NA	F	NA	NA	NA	NA	NA	NA	NA	NA	NA	NA	NA	NA	NA	NA	NA	NA	NA	NA	NA
GCCAACGATCCTGTGCTGCCCGAGCGTTCGC	3	CCGCCAACGATCCTGTGCTGCCCGAGCGTTCGC	33	0.0420540790135507	10.489565	1	-3.390883	F	NA	NA	NA	NA	NA	NA	NA	NA	NA	NA	NA	NA	NA	NA	NA	NA	NA	NA	F	NA	NA	NA	NA	NA	NA	NA	NA	NA	NA	NA	NA	NA	NA	NA	NA	NA	NA	NA
ACGATTGAGATTGTGGGCTTCTCCGTCGCGC	18	ATACTGCGCGACGGAGAAGCCCACAATCTCAATCGTCGTCGGAAGGAA	48	0.0162404960327055	48.074783	1	-5.587208	F	NA	NA	NA	NA	NA	NA	NA	NA	NA	NA	NA	NA	NA	NA	NA	NA	NA	NA	F	NA	NA	NA	NA	NA	NA	NA	NA	NA	NA	NA	NA	NA	NA	NA	NA	NA	NA	NA
AAGCGCGTCTTGTGCGCTTCTACTTATGAGT	46	TAACCGGCGAACGAAACGGTCCGAACTCATAAGTAGAAGCGCACAAGACGCGCTTCGAAGAACTGATGGAGCCGGA	76	0.0047321561601052	53.407391	1	-5.738968	F	NA	NA	NA	NA	NA	NA	NA	NA	NA	NA	NA	NA	NA	NA	NA	NA	NA	NA	F	NA	NA	NA	NA	NA	NA	NA	NA	NA	NA	NA	NA	NA	NA	NA	NA	NA	NA	NA
GCTTCACCGGCTTACGGAACGCTCCGCTACC	1	GCTTCACCGGCTTACGGAACGCTCCGCTACC	31	0.027495770773639	22.216522	1.100333	-4.335621	F	NA	NA	NA	NA	NA	NA	NA	NA	NA	NA	NA	NA	NA	NA	NA	NA	NA	NA	F	NA	NA	NA	NA	NA	NA	NA	NA	NA	NA	NA	NA	NA	NA	NA	NA	NA	NA	NA
CTGGTGACACAAAAGATGGACCCACTTGCCA	38	GGAAATTTCAGTTTATCGAATACAGGCCGTACAAAAGCCTGGTGACACAAAAGATGGACCCACTTGCCAGCCACG	75	0.00833102380626	21.73	1	-4.441616	F	NA	NA	NA	NA	NA	NA	NA	NA	NA	NA	NA	NA	NA	NA	NA	NA	NA	NA	F	NA	NA	NA	NA	NA	NA	NA	NA	NA	NA	NA	NA	NA	NA	NA	NA	NA	NA	NA
AGGCACAGATACGATGGGAACGGTCCATATC	13	GATCGTTGCAGGAGGCACAGATACGATGGGAACGGTCCATATCGT	45	0.0482129250404343	39.999565	1	-5.321912	F	NA	NA	NA	NA	NA	NA	NA	NA	NA	NA	NA	NA	NA	NA	NA	NA	NA	NA	F	NA	NA	NA	NA	NA	NA	NA	NA	NA	NA	NA	NA	NA	NA	NA	NA	NA	NA	NA
CCGGCTGGCAGGCATCATGGCGGCGCGGTGC	8	CCTTCGCCGGCTGGCAGGCATCATGGCGGCGCGGTGCC	38	0.0352511500401791	1.352609	9.811333	2.858704	F	NA	NA	NA	NA	NA	NA	NA	NA	NA	NA	NA	NA	NA	NA	NA	NA	NA	NA	F	NA	NA	NA	NA	NA	NA	NA	NA	NA	NA	NA	NA	NA	NA	NA	NA	NA	NA	NA
AGACCCAAAGGCTGGAGTGGTTGGTGCCGCT	9	GGCAGACCCAAAGGCTGGAGTGGTTGGTGCCGCTCACGC	39	0.0420360168046287	47.67	1.109	-5.42575	F	NA	NA	NA	NA	NA	NA	NA	NA	NA	NA	NA	NA	NA	NA	NA	NA	NA	NA	F	NA	NA	NA	NA	NA	NA	NA	NA	NA	NA	NA	NA	NA	NA	NA	NA	NA	NA	NA
CCTCGCCGGCCAGCTTGAGCAGGCTCGCCCC	2	GCCTCGCCGGCCAGCTTGAGCAGGCTCGCCCC	32	0.0400096209843608	1	7.782	2.960141	T	11925	chr16	2340481	2340496	NA	16S16M	0	0	0	1	0	16	F	T	0.5	0.9375	1	1	F	NA	ENSG00000167972	ABCA3	-	protein_coding	NA	NA	NA	NA	NA	NA	NA	NA	NA	NA	NA	NA	F	T
ACAGTATAAAATATAGATTTGGGGTACTTTG	16	ACAGTATAAAATATAGATTTGGGGTACTTTGGTATTTAATGTACAG	46	0.0393891702571833	164.928696	1	-7.365699	F	NA	NA	NA	NA	NA	NA	NA	NA	NA	NA	NA	NA	NA	NA	NA	NA	NA	NA	F	NA	NA	NA	NA	NA	NA	NA	NA	NA	NA	NA	NA	NA	NA	NA	NA	NA	NA	NA
ATAGAGGAAGCCGTCCTCGTCGAGATAGCCG	27	GTCGGTCAGATAGAGGAAGCCGTCCTCGTCGAGATAGCCGATGTCGCCGCTGCGGAA	57	0.0151883158828749	7.701304	1.084333	-2.828295	F	NA	NA	NA	NA	NA	NA	NA	NA	NA	NA	NA	NA	NA	NA	NA	NA	NA	NA	F	NA	NA	NA	NA	NA	NA	NA	NA	NA	NA	NA	NA	NA	NA	NA	NA	NA	NA	NA
ACGCCGGCCGCCGCCGGCTCCTTTGCATGGG	34	CAACCCCATGCAAAGGAGCCGGCGGCGGCCGGCGTTCGAACCAAGCCACTTGAAACGTCGGGCA	64	0.00877112095756257	10.004783	1.813667	-2.463708	F	NA	NA	NA	NA	NA	NA	NA	NA	NA	NA	NA	NA	NA	NA	NA	NA	NA	NA	F	NA	NA	NA	NA	NA	NA	NA	NA	NA	NA	NA	NA	NA	NA	NA	NA	NA	NA	NA
CTCAGCAGCCAGGCAGCCGAGAGGCCGGAAA	1	CTCAGCAGCCAGGCAGCCGAGAGGCCGGAAA	31	0.0457948508331038	44.382174	4.406333	-3.33233	T	15525	chr17	70962633	70962651	NA	19M12S	0	0	0	0	12	0	T	F	0.612903225806452	1	1	0	F	NA	NA	NA	NA	NA	NA	NA	NA	NA	ENSG00000271239	-	AC007423.1	183404	ENSG00000271101	+	AC005181.1	49345	NA	NA
ATGAACGCAACGCTGGCGGACGCATTGTCCG	26	CGCAAAACTCTTCACGACGGCGTTCCCGGACAATGCGTCCGCCAGCGTTGCGTTCATCGCCGCGTCGAGT	70	0.0360581388157042	12.558261	1	-3.650565	F	NA	NA	NA	NA	NA	NA	NA	NA	NA	NA	NA	NA	NA	NA	NA	NA	NA	NA	F	NA	NA	NA	NA	NA	NA	NA	NA	NA	NA	NA	NA	NA	NA	NA	NA	NA	NA	NA
ACTGTCATCCGGGCGTGATCGTTGCCGCCGA	6	CTCACTGTCATCCGGGCGTGATCGTTGCCGCCGATG	36	0.0198412538251592	32.381739	1	-5.017109	F	NA	NA	NA	NA	NA	NA	NA	NA	NA	NA	NA	NA	NA	NA	NA	NA	NA	NA	F	NA	NA	NA	NA	NA	NA	NA	NA	NA	NA	NA	NA	NA	NA	NA	NA	NA	NA	NA
AGAGTCGGCTGATGATGCCTTGATTGCGTGC	15	GTCAAGCACGCAATCAAGGCATCATCAGCCGACTCTGATACTCCC	45	0.0322423136756923	58.506087	1	-5.870515	F	NA	NA	NA	NA	NA	NA	NA	NA	NA	NA	NA	NA	NA	NA	NA	NA	NA	NA	F	NA	NA	NA	NA	NA	NA	NA	NA	NA	NA	NA	NA	NA	NA	NA	NA	NA	NA	NA
AGAATGCTTTTGACAAGATTCGAAATTAGGA	3	CAGAATGCTTTTGACAAGATTCGAAATTAGGAA	33	0.0264786197056712	28.914348	1.507333	-4.261715	T	3906	chr1	49200329	49200345	NA	17M16S	0	0	0	0	16	0	T	F	0.515151515151515	1	2	0	F	NA	ENSG00000186094	AGBL4	-	protein_coding	NA	NA	NA	NA	NA	NA	NA	NA	NA	NA	NA	NA	F	T
CGCCCCACGCGCATCGAATTCGACCCTGCAA	34	TCCGGCCCGCGGCCGGAAGGCTTAAGACCAAACCAGACTGCGCCCCACGCGCATCGAATTCGACCCTGCAAAC	73	0.0319363343440243	10.53	1.068	-3.301522	F	NA	NA	NA	NA	NA	NA	NA	NA	NA	NA	NA	NA	NA	NA	NA	NA	NA	NA	F	NA	NA	NA	NA	NA	NA	NA	NA	NA	NA	NA	NA	NA	NA	NA	NA	NA	NA	NA
GATTGGCAATGCAGCCGGGTGGCTTTCGTGC	28	AGCGCGGGGCTCGGGCCGGATTGGCAATGCAGCCGGGTGGCTTTCGTGCTGACCACCT	58	0.00853017823014356	1.126522	14.573667	3.693417	F	NA	NA	NA	NA	NA	NA	NA	NA	NA	NA	NA	NA	NA	NA	NA	NA	NA	NA	F	NA	NA	NA	NA	NA	NA	NA	NA	NA	NA	NA	NA	NA	NA	NA	NA	NA	NA	NA
AATTACTATTACGATAACCCTCCATCAGTAG	10	AGTTTTACCCTACTGATGGAGGGTTATCGTAATAGTAATT	40	0.0331642156683366	48.911739	7.506333	-2.704001	F	NA	NA	NA	NA	NA	NA	NA	NA	NA	NA	NA	NA	NA	NA	NA	NA	NA	NA	F	NA	NA	NA	NA	NA	NA	NA	NA	NA	NA	NA	NA	NA	NA	NA	NA	NA	NA	NA
AAGGTCGGGAGGCGGGTCTGCTGCTTGCGGA	47	AGAATGACGAGAAAGGTCGGGAGGCGGGTCTGCTGCTTGCGGAGGGCCATCGTGGCTGCTGTCATCGCAAGTGCGCC	77	0.00658238756144964	44.055217	1	-5.461241	F	NA	NA	NA	NA	NA	NA	NA	NA	NA	NA	NA	NA	NA	NA	NA	NA	NA	NA	F	NA	NA	NA	NA	NA	NA	NA	NA	NA	NA	NA	NA	NA	NA	NA	NA	NA	NA	NA
GATCTCGCGCGCGCTGCTGACCAATCCGCAC	4	GGCGATCTCGCGCGCGCTGCTGACCAATCCGCAC	34	0.0476971739679985	1	6.696667	2.743443	F	NA	NA	NA	NA	NA	NA	NA	NA	NA	NA	NA	NA	NA	NA	NA	NA	NA	NA	F	NA	NA	NA	NA	NA	NA	NA	NA	NA	NA	NA	NA	NA	NA	NA	NA	NA	NA	NA
GGGGCGGCCAACGCGTTTCCCGTCACTATTA	9	GCAGGTCATAATAGTGACGGGAAACGCGTTGGCCGCCCCCGC	42	0.0276325557700049	1	8.734333	3.126698	F	NA	NA	NA	NA	NA	NA	NA	NA	NA	NA	NA	NA	NA	NA	NA	NA	NA	NA	F	NA	NA	NA	NA	NA	NA	NA	NA	NA	NA	NA	NA	NA	NA	NA	NA	NA	NA	NA
CATATCTACACCCTATCCTACACTCTTTCCC	6	CCACCCATATCTACACCCTATCCTACACTCTTTCCC	36	0.0202119753726507	43.026087	1	-5.42714	T	9586	chr6	120054391	120054410	NA	20M16S	0	0	0	2	16	0	T	F	0.555555555555556	0.9	1	2	F	NA	NA	NA	NA	NA	NA	NA	NA	NA	ENSG00000265725	+	MIR3144	39135	ENSG00000286540	+	AL096854.1	408100	NA	NA
ATGCCGAAGCCGCCGCCACCACCGCCCCCTC	12	AATGCCGAAGCCGCCGCCACCACCGCCCCCTCCGCTGTCGTC	42	0.0391744897096015	1	6.569	2.715674	T	7697	chr18	158575	158595	NA	5S21M16S	0	0	0	0	16	5	T	T	0.5	1	1	0	F	NA	ENSG00000101557	USP14	+	protein_coding	NA	NA	NA	NA	NA	NA	NA	NA	NA	NA	NA	NA	T	F
CCTTGTAGACCTTCTCGCGCAGGTCGCGCCG	2	GCCTTGTAGACCTTCTCGCGCAGGTCGCGCCG	32	0.0324739808000498	12.882174	1	-3.687304	T	12292	chr4	120098049	120098064	NA	16M16S	0	0	0	1	16	0	T	F	0.5	0.9375	1	1	F	NA	ENSG00000250938	AC073475.1	+	lncRNA	NA	NA	NA	NA	NA	NA	NA	NA	NA	NA	NA	NA	F	T
AGAACTGCGCCAGCAGCCCCGACAAATTCTA	7	GAAGAACTGCGCCAGCAGCCCCGACAAATTCTACATG	37	0.0327297410105901	19.381739	1	-4.276626	F	NA	NA	NA	NA	NA	NA	NA	NA	NA	NA	NA	NA	NA	NA	NA	NA	NA	NA	F	NA	NA	NA	NA	NA	NA	NA	NA	NA	NA	NA	NA	NA	NA	NA	NA	NA	NA	NA
CGCGGATCGTGCCGCTGAACAGGAAGTTCTC	2	GAGAACTTCCTGTTCAGCGGCACGATCCGCGA	32	0.0297786630894571	8.311739	1.052333	-2.981559	T	14123	chr11	59829973	59829988	NA	16M16S	0	0	0	0	16	0	T	F	0.5	1	1	0	F	NA	ENSG00000134812	CBLIF	-	protein_coding	NA	NA	NA	NA	NA	NA	NA	NA	NA	NA	NA	NA	F	T
GCTCTTAACCATCTTCATGTTAAACCTCCAA	4	ACTTGGAGGTTTAACATGAAGATGGTTAAGAGCC	34	0.0409997619740549	30.896087	6.989	-2.144266	T	18544	chr4	80791089	80791106	NA	18M16S	0	0	0	1	16	0	T	F	0.529411764705882	0.944444444444444	1	1	F	NA	ENSG00000197826	CFAP299	+	protein_coding	NA	NA	NA	NA	NA	NA	NA	NA	NA	NA	NA	NA	F	T
CCGTGCGATCCTGGATTTCACGTCCGGGCAG	39	GCACCTTCGCGCCCGTCATCATCGAGCGTGCCTCCGGGTCCTTTGTCTATGACGCCGACGGCCGTGCGATCCTGGATTTCACGTCCGGGCAGATGAG	97	0.0218610881226054	19.875217	2.052	-3.275868	F	NA	NA	NA	NA	NA	NA	NA	NA	NA	NA	NA	NA	NA	NA	NA	NA	NA	NA	F	NA	NA	NA	NA	NA	NA	NA	NA	NA	NA	NA	NA	NA	NA	NA	NA	NA	NA	NA
CGCGGGTCGGGGCGGCGGCGGCGGCGGCGGA	1	CGCGGGTCGGGGCGGCGGCGGCGGCGGCGGA	31	0.0292669536340852	1	5.567333	2.476986	T	14171	chr21	8258948	8258978	NA	31M	0	0	0	1	0	0	F	F	1	0.967741935483871	5	1	F	NA	NA	NA	NA	NA	NA	NA	NA	NA	ENSG00000277739	+	RF00002	2016	ENSG00000280441	+	FP236383.1	121664	NA	NA
CGGTCGGCATGGCGGTCGGCGCATTCAGCAA	2	CCGGTCGGCATGGCGGTCGGCGCATTCAGCAA	32	0.0347509301608053	8.576087	1	-3.10032	T	14932	chr5	777931	777948	NA	4S18M10S	0	0	0	0	10	4	T	T	0.5625	1	1	0	F	NA	ENSG00000206077	ZDHHC11B	-	protein_coding	NA	NA	NA	NA	NA	NA	NA	NA	NA	NA	NA	NA	F	T
CGAGGTCGAGGCAGCCAAGGAGAAGAAGGCC	25	GTCCGAGGTCGAGGCAGCCAAGGAGAAGAAGGCCCTCGACGCCAAGACCACTCTC	55	0.0258072252753677	20.591304	1.105333	-4.219482	F	NA	NA	NA	NA	NA	NA	NA	NA	NA	NA	NA	NA	NA	NA	NA	NA	NA	NA	F	NA	NA	NA	NA	NA	NA	NA	NA	NA	NA	NA	NA	NA	NA	NA	NA	NA	NA	NA
ACCTGGTGCAGGACGTCTGGACCGTTCTGAT	29	GACCGGCCGGAATCTCCAGATTCACCTGGTGCAGGACGTCTGGACCGTTCTGATAACCG	59	0.0334498371025336	81.980435	1	-6.357208	F	NA	NA	NA	NA	NA	NA	NA	NA	NA	NA	NA	NA	NA	NA	NA	NA	NA	NA	F	NA	NA	NA	NA	NA	NA	NA	NA	NA	NA	NA	NA	NA	NA	NA	NA	NA	NA	NA
ATCGGGGTGGGGTGAAGCCGCACAAATGGTC	13	CTGAGACCATTTGTGCGGCTTCACCCCACCCCGATCGCACTCG	43	0.0309997343978843	16.984783	1.485667	-3.51506	F	NA	NA	NA	NA	NA	NA	NA	NA	NA	NA	NA	NA	NA	NA	NA	NA	NA	NA	F	NA	NA	NA	NA	NA	NA	NA	NA	NA	NA	NA	NA	NA	NA	NA	NA	NA	NA	NA
AGGCCAGCGCGGGCGACAGCAGGCCGGCGCG	11	GCAGCGAGGCCAGCGCGGGCGACAGCAGGCCGGCGCGGACGTCGATCACG	50	0.0398817638838437	27.243043	8.634333	-1.657731	F	NA	NA	NA	NA	NA	NA	NA	NA	NA	NA	NA	NA	NA	NA	NA	NA	NA	NA	T	chr16:1791985:+|chr1:115838499:+	NA	NA	NA	NA	NA	NA	NA	NA	NA	NA	NA	NA	NA	NA	NA	NA	NA	NA
CTGCGCTCGGGCACCGGTAGCTGAAAGCCGA	51	GTCACGGTGCGATCGTCCGGGATCTCACCGATCATCAGGGGGCGCAGCTGCGCTCGGGCACCGGTAGCTGAAAGCCGAACGGAAAGCGACGCC	93	0.0146397925170068	1	7.946667	2.99035	F	NA	NA	NA	NA	NA	NA	NA	NA	NA	NA	NA	NA	NA	NA	NA	NA	NA	NA	F	NA	NA	NA	NA	NA	NA	NA	NA	NA	NA	NA	NA	NA	NA	NA	NA	NA	NA	NA
GTCCATCCATGACCGATAAATCTTTCCAACA	14	CAAGCTGATAGGCCGCGAGTCCATCCATGACCGATAAATCTTTCCAACAA	50	0.0110005332614046	78.546522	2.385333	-5.041285	F	NA	NA	NA	NA	NA	NA	NA	NA	NA	NA	NA	NA	NA	NA	NA	NA	NA	NA	F	NA	NA	NA	NA	NA	NA	NA	NA	NA	NA	NA	NA	NA	NA	NA	NA	NA	NA	NA
CTCTTCGGCTGCAAGCCTGGGATGCTCGACC	3	CGCTCTTCGGCTGCAAGCCTGGGATGCTCGACC	33	0.0468332245936396	1.378696	6.825333	2.307595	T	15734	chr11	77267199	77267219	NA	12S21M	0	0	0	2	0	12	F	T	0.636363636363636	0.904761904761905	1	2	F	NA	ENSG00000178795	GDPD4	-	protein_coding	NA	NA	NA	NA	NA	NA	NA	NA	NA	NA	NA	NA	F	T
CCGCGGCGAGCGCCACGCGCATGCGCCAGCC	1	CCGCGGCGAGCGCCACGCGCATGCGCCAGCC	31	0.0455294187044728	19.417391	1.106	-4.133926	T	11213	chr11	98185560	98185575	NA	5S16M10S	0	0	0	0	10	5	T	T	0.516129032258065	1	1	0	F	NA	NA	NA	NA	NA	NA	NA	NA	NA	ENSG00000255380	-	AP001317.1	54363	ENSG00000254939	-	AP003038.1	379498	NA	NA
CCGACCGCGACGCAGGCCACGCCGGCAAGCG	31	ATCATCATCTTGAGGACGACGGCAAACAGCAGCCCGACCGCGACGCAGGCCACGCCGGCAAGCGTGCGG	69	0.00955588926508664	11.824348	2.002667	-2.561766	F	NA	NA	NA	NA	NA	NA	NA	NA	NA	NA	NA	NA	NA	NA	NA	NA	NA	NA	F	NA	NA	NA	NA	NA	NA	NA	NA	NA	NA	NA	NA	NA	NA	NA	NA	NA	NA	NA
GCCTGGGACAGACAGTTTGTTCAAATATACC	13	CCCAGCCCCTGCCTGGGACAGACAGTTTGTTCAAATATACCCT	43	0.0424602831858407	30.824783	1	-4.946019	T	17887	chr17	48549434	48549472	NA	16M4I23M	1	0	0	3	0	0	F	F	1	0.813953488372093	1	4	F	NA	ENSG00000120093	HOXB3	-	protein_coding	NA	NA	NA	NA	NA	NA	NA	NA	NA	NA	NA	NA	T	F
CACACATCTACACCCCAGCCTACACTCTTTC	7	AAGAGCACACATCTACACCCCAGCCTACACTCTTTCC	37	0.0123556423523775	112.900435	1.373667	-6.360875	F	NA	NA	NA	NA	NA	NA	NA	NA	NA	NA	NA	NA	NA	NA	NA	NA	NA	NA	F	NA	NA	NA	NA	NA	NA	NA	NA	NA	NA	NA	NA	NA	NA	NA	NA	NA	NA	NA
ATCGATCTCAATGGAAAGCTGCCGCGCGGTC	27	CCAGGTACTGGAGACCGCGCGGCAGCTTTCCATTGAGATCGATCAGACGCTCACCCG	57	0.0365717498214468	26.877826	1.904667	-3.818806	F	NA	NA	NA	NA	NA	NA	NA	NA	NA	NA	NA	NA	NA	NA	NA	NA	NA	NA	F	NA	NA	NA	NA	NA	NA	NA	NA	NA	NA	NA	NA	NA	NA	NA	NA	NA	NA	NA
CGATCGGTAGGCGCCAAGTCGCGCTTCACTA	9	CGATCGGTAGGCGCCAAGTCGCGCTTCACTAGTCCGACA	39	0.0470072484653066	1.570435	7.819333	2.315881	F	NA	NA	NA	NA	NA	NA	NA	NA	NA	NA	NA	NA	NA	NA	NA	NA	NA	NA	F	NA	NA	NA	NA	NA	NA	NA	NA	NA	NA	NA	NA	NA	NA	NA	NA	NA	NA	NA
GTGGTGTCTGCGTTCAAGCCACAGAATTGAA	12	GGGATGTTCAATTCTGTGGCTTGAACGCAGACACCACAAAGA	42	0.0335515891934397	246.809565	1	-7.947254	T	19793	chr8	44047032	44047073	NA	42M	0	0	0	1	0	0	F	F	1	0.976190476190476	10	1	F	NA	NA	NA	NA	NA	NA	NA	NA	NA	ENSG00000253198	-	AC139365.1	372442	ENSG00000276685	-	RF01518	1981730	NA	NA
AATCATCTAATGGAATGGAAAGGAATAATCC	7	AATGGAATCATCTAATGGAATGGAAAGGAATAATCCA	37	0.0317035592103137	131.546522	3.651	-5.171138	T	1354	chr1	143193313	143193349	NA	37M	0	0	0	1	0	0	F	F	1	0.972972972972973	18	1	F	NA	NA	NA	NA	NA	NA	NA	NA	NA	ENSG00000224857	-	LINC01691	21612790	ENSG00000276118	+	AC242852.1	149830	NA	NA
ACGGCGACGATCGCCGCACTCGTTCTGTCGG	1	ACGGCGACGATCGCCGCACTCGTTCTGTCGG	31	0.0359013004201158	19.82	3.404667	-2.541371	T	3265	chr1	73472928	73472943	NA	16M15S	0	0	0	1	15	0	T	F	0.516129032258065	0.9375	1	1	F	NA	NA	NA	NA	NA	NA	NA	NA	NA	ENSG00000233973	+	LINC01360	117676	ENSG00000223479	+	LINC02238	162272	NA	NA
CGATCATCGCGCTTCGCACGGCATTCTTGAA	3	CGATCATCGCGCTTCGCACGGCATTCTTGAAAA	33	0.0395132840221338	1	12.341333	3.625426	T	13287	chr18	79814516	79814533	NA	15S18M	0	0	0	1	0	15	F	T	0.545454545454545	0.944444444444444	1	1	F	NA	ENSG00000267780	AC021594.2	+	lncRNA	NA	NA	NA	NA	NA	NA	NA	NA	NA	NA	NA	NA	F	T
AAACTGTACATAAAATATGAAAGTACATCAA	6	TTATAAACTGTACATAAAATATGAAAGTACATCAAA	36	0.0401862722709032	582.201304	9.182333	-5.986514	T	169	KI270467.1	1249	1284	NA	36M	0	0	0	1	0	0	F	F	1	0.972222222222222	1	1	F	NA	NA	NA	NA	NA	NA	NA	NA	NA	NA	NA	NA	NA	NA	NA	NA	NA	NA	NA
TCGCGCGTCGCATTGGCAAGCCGCAGCAGAA	1	TCGCGCGTCGCATTGGCAAGCCGCAGCAGAA	31	0.0283001321378382	1	6.163	2.623633	F	NA	NA	NA	NA	NA	NA	NA	NA	NA	NA	NA	NA	NA	NA	NA	NA	NA	NA	F	NA	NA	NA	NA	NA	NA	NA	NA	NA	NA	NA	NA	NA	NA	NA	NA	NA	NA	NA
ATCGGAGGTCAGGAACTGCATGAAGGCGGTG	47	ACCGGCGCGCATTACCTCAACGGCGACACCACCGCCTTCATGCAGTTCCTGACCTCCGATCTCTTCAAGCGTTTCCC	77	0.00900958210993513	13.192174	1.785	-2.885686	F	NA	NA	NA	NA	NA	NA	NA	NA	NA	NA	NA	NA	NA	NA	NA	NA	NA	NA	F	NA	NA	NA	NA	NA	NA	NA	NA	NA	NA	NA	NA	NA	NA	NA	NA	NA	NA	NA
CTAATAAGCGCCCCCGAGTCCCTAATCATTC	6	AAAGCGAATGATTAGGGACTCGGGGGCGCTTATTAG	36	0.0166060192706219	1	6.655333	2.734511	F	NA	NA	NA	NA	NA	NA	NA	NA	NA	NA	NA	NA	NA	NA	NA	NA	NA	NA	F	NA	NA	NA	NA	NA	NA	NA	NA	NA	NA	NA	NA	NA	NA	NA	NA	NA	NA	NA
CTCGAAGTGTCGATGATCAATGTGTCCTGCA	1	CTCGAAGTGTCGATGATCAATGTGTCCTGCA	31	0.0325157791372987	1.21	6.514667	2.428684	T	15599	chr21	8256853	8256883	NA	31M	0	0	0	1	0	0	F	F	1	0.967741935483871	6	1	F	NA	ENSG00000277739	RF00002	+	rRNA	NA	NA	NA	NA	NA	NA	NA	NA	NA	NA	NA	NA	T	F
ATTGTGTTGCCTGAGTGGGACATGATCTGAG	27	ACTCAGATCATGTCCCACTCAGGCAACACAATGGGCTCCTGGTCGCAGGCTTTGGCA	57	0.0150731388801624	50.99087	1	-5.672167	F	NA	NA	NA	NA	NA	NA	NA	NA	NA	NA	NA	NA	NA	NA	NA	NA	NA	NA	F	NA	NA	NA	NA	NA	NA	NA	NA	NA	NA	NA	NA	NA	NA	NA	NA	NA	NA	NA
GCGATGCTGATGGCCGGCCTCGACGGCATCA	4	TTGATGCCGTCGAGGCCGGCCATCAGCATCGCCG	34	0.0259439272229378	1.04087	5.547667	2.414091	F	NA	NA	NA	NA	NA	NA	NA	NA	NA	NA	NA	NA	NA	NA	NA	NA	NA	NA	F	NA	NA	NA	NA	NA	NA	NA	NA	NA	NA	NA	NA	NA	NA	NA	NA	NA	NA	NA
GCGGGTCGACGGCACGATCACGGTGCCTTCC	71	GCTTTGACGGGTGGTTGCAGTTACGTAACCGTCAGCTCATCGGAACTGAGGTGCGGGTCGACGGCACGATCACGGTGCCTTCCGGAACAGCACGAGTGCGG	101	0.0249342527954288	59.24	1.091	-5.762849	F	NA	NA	NA	NA	NA	NA	NA	NA	NA	NA	NA	NA	NA	NA	NA	NA	NA	NA	F	NA	NA	NA	NA	NA	NA	NA	NA	NA	NA	NA	NA	NA	NA	NA	NA	NA	NA	NA
CTCGCGCTCGATCTGTCAAAACCCGAAGGCC	4	CCTCGCGCTCGATCTGTCAAAACCCGAAGGCCAG	34	0.0328764289771447	1.061304	6.768667	2.673034	F	NA	NA	NA	NA	NA	NA	NA	NA	NA	NA	NA	NA	NA	NA	NA	NA	NA	NA	F	NA	NA	NA	NA	NA	NA	NA	NA	NA	NA	NA	NA	NA	NA	NA	NA	NA	NA	NA
AGCCATGAACGACTGCTGCGCATCCTCGTCC	9	GCTCTGGGACGAGGATGCGCAGCAGTCGTTCATGGCTTCACGC	43	0.0334071173001776	23.920435	2.924333	-3.032064	F	NA	NA	NA	NA	NA	NA	NA	NA	NA	NA	NA	NA	NA	NA	NA	NA	NA	NA	F	NA	NA	NA	NA	NA	NA	NA	NA	NA	NA	NA	NA	NA	NA	NA	NA	NA	NA	NA
CAGGTGTCGGTTGGCAGCGCGCGCGACCAGC	9	ACTTGGCCAGGTGTCGGTTGGCAGCGCGCGCGACCAGCC	39	0.0426272072787428	12.27913	2.384333	-2.364551	F	NA	NA	NA	NA	NA	NA	NA	NA	NA	NA	NA	NA	NA	NA	NA	NA	NA	NA	F	NA	NA	NA	NA	NA	NA	NA	NA	NA	NA	NA	NA	NA	NA	NA	NA	NA	NA	NA
CGCCATCACCCGGCGTGCGGGCTAAATTCAG	41	GATGACGATCGAGAACGACAGAATGCGCAACATGATCTGAATTTAGCCCGCACGCCGGGTGATGGCGATTC	71	0.0169112215956212	1	8.012333	3.002222	F	NA	NA	NA	NA	NA	NA	NA	NA	NA	NA	NA	NA	NA	NA	NA	NA	NA	NA	F	NA	NA	NA	NA	NA	NA	NA	NA	NA	NA	NA	NA	NA	NA	NA	NA	NA	NA	NA
GTCGAGACCGATCGTGCGGCCGCCTTCGTGA	36	CTTGCGACCAGGCTCGCGAGCAGGATGTCGTCCATCACGAAGGCGGCCGCACGATCGGTCTCGACC	66	0.0439904434626205	22.905217	1.020667	-4.488092	F	NA	NA	NA	NA	NA	NA	NA	NA	NA	NA	NA	NA	NA	NA	NA	NA	NA	NA	F	NA	NA	NA	NA	NA	NA	NA	NA	NA	NA	NA	NA	NA	NA	NA	NA	NA	NA	NA
CCGCGGGTGTCGTCATAGGCGAGCAGCGTCG	31	GTGCGGCATGCTCGCCATCGGCACGCCGCGGGTGTCGTCATAGGCGAGCAGCGTCGCAACC	61	0.00542301441085052	23.062609	2.061333	-3.483906	F	NA	NA	NA	NA	NA	NA	NA	NA	NA	NA	NA	NA	NA	NA	NA	NA	NA	NA	F	NA	NA	NA	NA	NA	NA	NA	NA	NA	NA	NA	NA	NA	NA	NA	NA	NA	NA	NA
CTTGCCGCCGGTGTGCATGTAGGCGATCGCC	9	AGGCGATCGCCTACATGCACACCGGCGGCAAGATGGGCGAGAAGCA	46	0.0317035592103137	12.258696	1	-3.615734	T	16138	chr1	24929771	24929794	NA	24M22S	0	0	0	3	22	0	T	F	0.521739130434783	0.875	1	3	F	NA	ENSG00000020633	RUNX3	-	protein_coding	NA	NA	NA	NA	NA	NA	NA	NA	NA	NA	NA	NA	T	F
CGCGACAATCCGGATGAGAGCGAAGTCTCAC	28	CATTCACGGCCACTTATAGCGCGACAATCCGGATGAGAGCGAAGTCTCACCTTGATCG	58	0.0350946932248382	1.061304	10.240333	3.270353	F	NA	NA	NA	NA	NA	NA	NA	NA	NA	NA	NA	NA	NA	NA	NA	NA	NA	NA	F	NA	NA	NA	NA	NA	NA	NA	NA	NA	NA	NA	NA	NA	NA	NA	NA	NA	NA	NA
CATCCAGGTCCGGCCGCGATGCCGCGGGCGG	76	CCCACAACTTTCGTCACTGGAACCTAAATCCAGCGCGTCTACCAGTTCCGCCACGCCCGCGCGAAAAGCATCCAGGTCCGGCCGCGATGCCGCGGGCGGCCGGGCTTATAACAT	114	0.0103823110213503	17.709565	2.104333	-3.073094	F	NA	NA	NA	NA	NA	NA	NA	NA	NA	NA	NA	NA	NA	NA	NA	NA	NA	NA	F	NA	NA	NA	NA	NA	NA	NA	NA	NA	NA	NA	NA	NA	NA	NA	NA	NA	NA	NA
GCGCATTCGGTGGCGATGTCGTTGCAGCGGA	29	CTTGCTCAGTATCCGCTGCAACGACATCGCCACCGAATGCGCGCCAGGGAGCAGCCCAA	59	0.0413233410343279	7.642174	1.136333	-2.749597	F	NA	NA	NA	NA	NA	NA	NA	NA	NA	NA	NA	NA	NA	NA	NA	NA	NA	NA	F	NA	NA	NA	NA	NA	NA	NA	NA	NA	NA	NA	NA	NA	NA	NA	NA	NA	NA	NA
CAGGCCGCCGACATGCGGCGTTGCGATCACA	8	ATGTGATCGCAACGCCGCATGTCGGCGGCCTGACCCCG	38	0.0460938311852155	19.174348	1.517	-3.659885	F	NA	NA	NA	NA	NA	NA	NA	NA	NA	NA	NA	NA	NA	NA	NA	NA	NA	NA	F	NA	NA	NA	NA	NA	NA	NA	NA	NA	NA	NA	NA	NA	NA	NA	NA	NA	NA	NA
CCCGTGCAAAGCTCCAGGACCTTCTCCTTGC	1	CCCGTGCAAAGCTCCAGGACCTTCTCCTTGC	31	0.0383631902165674	30.17087	1.014	-4.895027	T	10767	chr19	1147923	1147940	NA	18M13S	0	0	0	0	13	0	T	F	0.580645161290323	1	1	0	F	NA	ENSG00000064932	SBNO2	-	protein_coding	NA	NA	NA	NA	NA	NA	NA	NA	NA	NA	NA	NA	F	T
ATCGCGCCGAGCTGCGCCGTGGTGTAGCCGG	40	CATGGACCCGAACGACGTGATCGCGGTGACCGGCTACACCACGGCGCAGCTCGGCGCGATCATCCTGCAG	70	0.00628985007746395	1	9.598	3.262734	F	NA	NA	NA	NA	NA	NA	NA	NA	NA	NA	NA	NA	NA	NA	NA	NA	NA	NA	F	NA	NA	NA	NA	NA	NA	NA	NA	NA	NA	NA	NA	NA	NA	NA	NA	NA	NA	NA
CGGCTCCCATCTCAGGGTGAGGGGCTCCGGC	4	AGACGGCTCCCATCTCAGGGTGAGGGGCTCCGGC	34	0.0184465297595299	9.135652	1	-3.191508	T	14756	GL000253.2	2579256	2579281	NA	8S26M	0	0	0	0	0	8	F	T	0.764705882352941	1	2	0	F	NA	NA	NA	NA	NA	NA	NA	NA	NA	NA	NA	NA	NA	NA	NA	NA	NA	NA	NA
CGGACTTGAGGGTTTGGGCGGCGGCAGCCGA	24	GGCTATCCCCGGACTTGAGGGTTTGGGCGGCGGCAGCCGAAACTCCAAAGAACA	54	0.0399819421057399	1	5.156	2.366252	F	NA	NA	NA	NA	NA	NA	NA	NA	NA	NA	NA	NA	NA	NA	NA	NA	NA	NA	F	NA	NA	NA	NA	NA	NA	NA	NA	NA	NA	NA	NA	NA	NA	NA	NA	NA	NA	NA
CCGGCTCCTATGGCAGCCTGCTCGAAACCGG	25	GGGCAATACCATTGCCGGCTCCTATGGCAGCCTGCTCGAAACCGGTGCCGATGCC	55	0.0334244756391703	1	6.185	2.628774	F	NA	NA	NA	NA	NA	NA	NA	NA	NA	NA	NA	NA	NA	NA	NA	NA	NA	NA	F	NA	NA	NA	NA	NA	NA	NA	NA	NA	NA	NA	NA	NA	NA	NA	NA	NA	NA	NA
TGGTGTCGAATGGAATCATCATTGAATGGAA	3	GATTCCATTCAATGATGATTCCATTCGACACCA	33	0.0349398476708779	112.812609	1	-6.817785	T	20859	chr16	36191576	36191608	NA	33M	0	0	0	1	0	0	F	F	1	0.96969696969697	3	1	F	NA	NA	NA	NA	NA	NA	NA	NA	NA	ENSG00000261084	+	PPP1R1AP2	279061	ENSG00000261239	-	ANKRD26P1	10277732	NA	NA
CAGTTTCCATCCCATCACGGGGTTAAGCCCC	2	CAGTTTCCATCCCATCACGGGGTTAAGCCCCG	32	0.0444665677147787	97.883043	1	-6.612987	T	9547	chr2	147847600	147847615	NA	16M16S	0	0	0	1	16	0	T	F	0.5	0.9375	1	1	F	NA	ENSG00000121989	ACVR2A	+	protein_coding	NA	NA	NA	NA	NA	NA	NA	NA	NA	NA	NA	NA	F	T
GGGTGGATTTACCTGCAAGGTGCTGAGTTCA	2	GGGTGGATTTACCTGCAAGGTGCTGAGTTCAC	32	0.0471912948003045	13.724783	1.102667	-3.637714	T	19285	chr2	36123387	36123402	NA	16S16M	0	0	0	0	0	16	F	T	0.5	1	1	0	F	NA	NA	NA	NA	NA	NA	NA	NA	NA	ENSG00000234587	-	MRPL50P1	398246	ENSG00000233752	-	AC009414.1	175985	NA	NA
GAGCCGTGCTTCAGCGCGACCTGCGCGATCA	22	GATGATCGCGCAGGTCGCGCTGAAGCACGGCTCCGATGTCGAGGCCATCAAG	52	0.0133645709604304	37.192174	4.188333	-3.150551	F	NA	NA	NA	NA	NA	NA	NA	NA	NA	NA	NA	NA	NA	NA	NA	NA	NA	NA	F	NA	NA	NA	NA	NA	NA	NA	NA	NA	NA	NA	NA	NA	NA	NA	NA	NA	NA	NA
CCAGTGCTCTACCCCGTGAGGTATTCACTCG	3	GCCTCGAGTGAATACCTCACGGGGTAGAGCACTGG	35	0.0284765164288085	3.925217	21.236333	2.43569	F	NA	NA	NA	NA	NA	NA	NA	NA	NA	NA	NA	NA	NA	NA	NA	NA	NA	NA	F	NA	NA	NA	NA	NA	NA	NA	NA	NA	NA	NA	NA	NA	NA	NA	NA	NA	NA	NA
CTTCGACCGCACCGCCACCTCGCTCGCCGAA	6	TCTTCGACCGCACCGCCACCTCGCTCGCCGAAGACA	36	0.0487769486971518	6.742609	1	-2.753307	F	NA	NA	NA	NA	NA	NA	NA	NA	NA	NA	NA	NA	NA	NA	NA	NA	NA	NA	F	NA	NA	NA	NA	NA	NA	NA	NA	NA	NA	NA	NA	NA	NA	NA	NA	NA	NA	NA
AACCCAAAAAACATATCCGCAGGGAGGAAAT	5	TAAACCCAAAAAACATATCCGCAGGGAGGAAATGA	35	0.0431782511688966	13.837826	1.124333	-3.621476	T	567	chr14	99893660	99893678	NA	19M16S	0	0	0	2	16	0	T	F	0.542857142857143	0.894736842105263	1	2	F	NA	ENSG00000066629	EML1	+	protein_coding	NA	NA	NA	NA	NA	NA	NA	NA	NA	NA	NA	NA	F	T
CCGGAGCCCGCAAGGGCGTCGCCACCACCCG	6	CGCCGGAGCCCGCAAGGGCGTCGCCACCACCCGCAT	36	0.0111507583001328	30.750435	4.893333	-2.651717	F	NA	NA	NA	NA	NA	NA	NA	NA	NA	NA	NA	NA	NA	NA	NA	NA	NA	NA	F	NA	NA	NA	NA	NA	NA	NA	NA	NA	NA	NA	NA	NA	NA	NA	NA	NA	NA	NA
ATGACGACGTGTTCGCTTTCTTCATTCGCGA	1	ATGACGACGTGTTCGCTTTCTTCATTCGCGA	31	0.0425553643907794	41.779565	1.027667	-5.345353	T	7538	chr18	30360268	30360283	NA	9S16M6S	0	0	0	0	6	9	T	T	0.516129032258065	1	1	0	F	NA	ENSG00000286605	AC115100.1	+	lncRNA	NA	NA	NA	NA	NA	NA	NA	NA	NA	NA	NA	NA	F	T
ACGCACAGCACGTTGCGGCACAGTCCGGCAT	55	CGCCACCGGTGGTCACGCCACCGATGACGCACAGCACGTTGCGGCACAGTCCGGCATCGATCGCCGCCGCCGCGCGCCAGATCAT	85	0.0179398805778491	40.594783	1	-5.343222	F	NA	NA	NA	NA	NA	NA	NA	NA	NA	NA	NA	NA	NA	NA	NA	NA	NA	NA	F	NA	NA	NA	NA	NA	NA	NA	NA	NA	NA	NA	NA	NA	NA	NA	NA	NA	NA	NA
CTCAAGGCGCTGAAGACTGCCAGCACGGCGA	1	CTCAAGGCGCTGAAGACTGCCAGCACGGCGA	31	0.0354604570836597	10.715652	1	-3.421648	T	15508	chr9	41862931	41862948	NA	9S18M4S	0	0	0	0	4	9	T	T	0.580645161290323	1	2	0	F	NA	NA	NA	NA	NA	NA	NA	NA	NA	ENSG00000275297	+	AL162731.1	98757	ENSG00000154529	-	CNTNAP3B	27365	NA	NA
ATTGCCCCCGGCGACCGGCTTTAGCGTGGTA	4	ATCTACCACGCTAAAGCCGGTCGCCGGGGGCAAT	34	0.0455459952015021	32.601739	1	-5.026877	T	8381	chr14	105494531	105494548	NA	18M16S	0	0	0	2	16	0	T	F	0.529411764705882	0.888888888888889	1	2	F	NA	ENSG00000185347	TEDC1	+	protein_coding	NA	NA	NA	NA	NA	NA	NA	NA	NA	NA	NA	NA	T	F
ATAATTGGATTTGGCTTGTTATTTCGCAAAT	10	TCGCATCCCCATAATTGGATTTGGCTTGTTATTTCGCAAATACTG	45	0.0278750189323149	5.61087	1	-2.488224	F	NA	NA	NA	NA	NA	NA	NA	NA	NA	NA	NA	NA	NA	NA	NA	NA	NA	NA	F	NA	NA	NA	NA	NA	NA	NA	NA	NA	NA	NA	NA	NA	NA	NA	NA	NA	NA	NA
CGACATCCCGCGCCTCACCGTGCGGGTCTGC	9	GAGGCCGACATCCCGCGCCTCACCGTGCGGGTCTGCGAC	39	0.029166975915784	10.625217	1	-3.40942	F	NA	NA	NA	NA	NA	NA	NA	NA	NA	NA	NA	NA	NA	NA	NA	NA	NA	NA	F	NA	NA	NA	NA	NA	NA	NA	NA	NA	NA	NA	NA	NA	NA	NA	NA	NA	NA	NA
GGATCACAGGCTCAAGATCGCAGACTATGGA	34	GTATACGCTTGTATCTATTTTTCTGGATCACAGGCTCAAGATCGCAGACTATGGACTGTATTCG	64	0.0137694389498578	1	8.783667	3.134823	F	NA	NA	NA	NA	NA	NA	NA	NA	NA	NA	NA	NA	NA	NA	NA	NA	NA	NA	F	NA	NA	NA	NA	NA	NA	NA	NA	NA	NA	NA	NA	NA	NA	NA	NA	NA	NA	NA
AAATGCCGGCCGCCGAGCTGACCCAGGCGCT	5	GAAATGCCGGCCGCCGAGCTGACCCAGGCGCTGGC	35	0.0370126443274916	12.303478	1.104	-3.478254	F	NA	NA	NA	NA	NA	NA	NA	NA	NA	NA	NA	NA	NA	NA	NA	NA	NA	NA	F	NA	NA	NA	NA	NA	NA	NA	NA	NA	NA	NA	NA	NA	NA	NA	NA	NA	NA	NA
GCTCAAGCCTTCGATGACGCGCGCCAGCGCC	11	CGAGGCTCAAGCCTTCGATGACGCGCGCCAGCGCCAGGATC	41	0.0424411503746878	1.516522	8.329	2.457377	F	NA	NA	NA	NA	NA	NA	NA	NA	NA	NA	NA	NA	NA	NA	NA	NA	NA	NA	F	NA	NA	NA	NA	NA	NA	NA	NA	NA	NA	NA	NA	NA	NA	NA	NA	NA	NA	NA
ATCCGGTCTGTTACTGCGCCACGTGATTTGG	35	CAACAAGTGGCGCTCGACCGACCGATGGTCAATCCGGTCTGTTACTGCGCCACGTGATTTGGTGAGCAGCC	71	0.0150731388801624	42.32087	1.373	-4.945966	F	NA	NA	NA	NA	NA	NA	NA	NA	NA	NA	NA	NA	NA	NA	NA	NA	NA	NA	F	NA	NA	NA	NA	NA	NA	NA	NA	NA	NA	NA	NA	NA	NA	NA	NA	NA	NA	NA
ATGTGGTGCGCCGATAGTCGCGCTTCCGTCC	7	CAGATGTGGTGCGCCGATAGTCGCGCTTCCGTCCAAT	37	0.033275990350789	34.831739	1	-5.122331	F	NA	NA	NA	NA	NA	NA	NA	NA	NA	NA	NA	NA	NA	NA	NA	NA	NA	NA	F	NA	NA	NA	NA	NA	NA	NA	NA	NA	NA	NA	NA	NA	NA	NA	NA	NA	NA	NA
CAATCCTCTTAACCTTCCAGCACCGGGCAGG	8	CTAACCAATCCTCTTAACCTTCCAGCACCGGGCAGGAG	38	0.00714407529912257	12.045217	1.520333	-2.986001	F	NA	NA	NA	NA	NA	NA	NA	NA	NA	NA	NA	NA	NA	NA	NA	NA	NA	NA	F	NA	NA	NA	NA	NA	NA	NA	NA	NA	NA	NA	NA	NA	NA	NA	NA	NA	NA	NA
CAGCTCGGCAAGCTTGAACTGGGTGTTTTGG	1	CAGCTCGGCAAGCTTGAACTGGGTGTTTTGG	31	0.0362399571745467	1	7.402	2.887915	T	9246	chr2	102911233	102911248	NA	16M15S	0	0	0	0	15	0	T	F	0.516129032258065	1	2	0	F	NA	ENSG00000170417	TMEM182	+	protein_coding	NA	NA	NA	NA	NA	NA	NA	NA	NA	NA	NA	NA	F	T
CGAATTGATGCGCAAATGCACGGTGCCGGAC	4	GGCGAATTGATGCGCAAATGCACGGTGCCGGACA	34	0.0358815797024806	1	9.398667	3.232456	F	NA	NA	NA	NA	NA	NA	NA	NA	NA	NA	NA	NA	NA	NA	NA	NA	NA	NA	F	NA	NA	NA	NA	NA	NA	NA	NA	NA	NA	NA	NA	NA	NA	NA	NA	NA	NA	NA
GGCCGGGGTTCTGGTCGATCCTTGCGATGAC	5	ATCCGGCCGGGGTTCTGGTCGATCCTTGCGATGAC	35	0.02655331107739	43.133043	2.634	-4.033466	F	NA	NA	NA	NA	NA	NA	NA	NA	NA	NA	NA	NA	NA	NA	NA	NA	NA	NA	F	NA	NA	NA	NA	NA	NA	NA	NA	NA	NA	NA	NA	NA	NA	NA	NA	NA	NA	NA
GGTCAATGTCTCACCGGCGCAGATCTGGAAC	1	GGTCAATGTCTCACCGGCGCAGATCTGGAAC	31	0.0417550040243068	1	4.987667	2.318365	T	19317	chrX	116368819	116368837	NA	12S19M	0	0	0	1	0	12	F	T	0.612903225806452	0.947368421052632	1	1	F	NA	NA	NA	NA	NA	NA	NA	NA	NA	ENSG00000180772	+	AGTR2	193846	ENSG00000207033	-	RNU6-154P	32010	NA	NA
CAGGCCGTCGACGCTTTTGCCGACGCCATCG	1	CAGGCCGTCGACGCTTTTGCCGACGCCATCG	31	0.0286028477336086	130.790435	13.102667	-3.319325	F	NA	NA	NA	NA	NA	NA	NA	NA	NA	NA	NA	NA	NA	NA	NA	NA	NA	NA	F	NA	NA	NA	NA	NA	NA	NA	NA	NA	NA	NA	NA	NA	NA	NA	NA	NA	NA	NA
CAGGCCTCGGCGCTGATCAACGCGGCGCGCA	5	ACCAGGCCTCGGCGCTGATCAACGCGGCGCGCAAC	35	0.0376125675163942	1	6.499	2.700218	F	NA	NA	NA	NA	NA	NA	NA	NA	NA	NA	NA	NA	NA	NA	NA	NA	NA	NA	F	NA	NA	NA	NA	NA	NA	NA	NA	NA	NA	NA	NA	NA	NA	NA	NA	NA	NA	NA
GTGTTCGGGCAGGCGGATCAGGCCGAGCTGA	27	CCGCCATGCTTCAGCTCGGCCTGATCCGCCTGCCCGAACACGCCGGTCCCACGGCGCGACCGGGCG	66	0.0266221965754109	1	5.782333	2.531652	F	NA	NA	NA	NA	NA	NA	NA	NA	NA	NA	NA	NA	NA	NA	NA	NA	NA	NA	F	NA	NA	NA	NA	NA	NA	NA	NA	NA	NA	NA	NA	NA	NA	NA	NA	NA	NA	NA
CTGTTTCACTCCCCTCCCGGGGTGCTTTTCA	4	ACTGTTTCACTCCCCTCCCGGGGTGCTTTTCACC	34	0.0358018152392955	19.224783	2.854	-2.75191	T	16005	chrX	22294605	22294621	NA	17M17S	0	0	0	1	17	0	T	F	0.5	0.941176470588235	1	1	F	NA	ENSG00000233067	PTCHD1-AS	-	lncRNA	NA	NA	NA	NA	NA	NA	NA	NA	NA	NA	NA	NA	F	T
CTGGTCGGGCGACGACCCCGCCGTGTTCGGC	30	CAGCAGGTCGCCGAACACGGCGGGGTCGTCGCCCGACCAGTGATCGAGGAAGTGGCGGAG	60	0.0219455813267233	26.19913	1.027667	-4.672074	F	NA	NA	NA	NA	NA	NA	NA	NA	NA	NA	NA	NA	NA	NA	NA	NA	NA	NA	F	NA	NA	NA	NA	NA	NA	NA	NA	NA	NA	NA	NA	NA	NA	NA	NA	NA	NA	NA
AGAGTCTGTAACGCCCGAAGCCGGCGGGATA	28	ATGAGAGTCTGTAACGCCCGAAGCCGGCGGGATAACCGAAAGGAGTCAGCCGTCTAAG	58	0.0112964541381904	13.138261	1	-3.715702	F	NA	NA	NA	NA	NA	NA	NA	NA	NA	NA	NA	NA	NA	NA	NA	NA	NA	NA	F	NA	NA	NA	NA	NA	NA	NA	NA	NA	NA	NA	NA	NA	NA	NA	NA	NA	NA	NA
CCTTTGATTCCATTCAAAGATGATTCCATTC	2	CCTTTGATTCCATTCAAAGATGATTCCATTCT	32	0.0349880844088797	1399.328261	59.445667	-4.557019	T	12314	chr16	46388233	46388264	NA	32M	0	0	0	1	0	0	F	F	1	0.96875	2	1	F	NA	NA	NA	NA	NA	NA	NA	NA	NA	ENSG00000261084	+	PPP1R1AP2	10475718	ENSG00000261239	-	ANKRD26P1	81076	NA	NA
AACTGGATGTCGGTGCGTCCGAGGCCGTGCA	71	GGCCAGTCCGAGGGCATCGACCTGCTGCTGCAATCGATCGGCCACATCGTGCACGGCCTCGGACGCACCGACATCCAGTTCAATATCGCCGGTACCGGGCC	101	0.0165199466322359	12.373913	1	-3.62923	F	NA	NA	NA	NA	NA	NA	NA	NA	NA	NA	NA	NA	NA	NA	NA	NA	NA	NA	F	NA	NA	NA	NA	NA	NA	NA	NA	NA	NA	NA	NA	NA	NA	NA	NA	NA	NA	NA
ATCAAGCGCGCTCTGAACCAGTGCCTCGGAA	8	TCAACGATTCCGAGGCACTGGTTCAGAGCGCGCTTGAT	38	0.026079455347375	3.462609	15.247333	2.138626	F	NA	NA	NA	NA	NA	NA	NA	NA	NA	NA	NA	NA	NA	NA	NA	NA	NA	NA	F	NA	NA	NA	NA	NA	NA	NA	NA	NA	NA	NA	NA	NA	NA	NA	NA	NA	NA	NA
AATGGAATCGAATGGAATCATCGAGTCGAAT	9	ATTCGATTCGACTCGATGATTCCATTCGATTCCATTCAA	39	0.0347509301608053	57.425217	1	-5.843612	T	1534	chr1	125180599	125180637	NA	39M	0	0	0	1	0	0	F	F	1	0.974358974358974	18	1	F	NA	NA	NA	NA	NA	NA	NA	NA	NA	ENSG00000224857	-	LINC01691	3600076	ENSG00000276118	+	AC242852.1	18162542	NA	NA
ACTGCGGACCGGCTCCCTCGCCGGGCGACGG	33	CCGCAGGCGAATGACAATTCGCCGTCGCCCGGCGAGGGAGCCGGTCCGCAGTGAGGCTCTCCG	63	0.00853017823014356	8.676957	1	-3.117189	F	NA	NA	NA	NA	NA	NA	NA	NA	NA	NA	NA	NA	NA	NA	NA	NA	NA	NA	F	NA	NA	NA	NA	NA	NA	NA	NA	NA	NA	NA	NA	NA	NA	NA	NA	NA	NA	NA
CTGTCACCAGGCTCGGTAGGTTTGTCGCCTC	1	CTGTCACCAGGCTCGGTAGGTTTGTCGCCTC	31	0.0494950006954425	1.59087	6.47	2.02395	T	15971	chrM	1985	2015	NA	31M	0	0	0	1	0	0	F	F	1	0.967741935483871	1	1	F	NA	ENSG00000210082	MT-RNR2	+	Mt_rRNA	NA	NA	NA	NA	NA	NA	NA	NA	NA	NA	NA	NA	T	F
ACGAGATTGATCACCACCATGGTGGCGAGCG	1	ACGAGATTGATCACCACCATGGTGGCGAGCG	31	0.0353944227644337	32.297826	1	-5.013365	T	2780	chr10	122159679	122159694	NA	16M15S	0	0	0	1	15	0	T	F	0.516129032258065	0.9375	1	1	F	NA	ENSG00000138162	TACC2	+	protein_coding	NA	NA	NA	NA	NA	NA	NA	NA	NA	NA	NA	NA	F	T
ACGGCGTGGGGTATACGCCTCGCGTCAAGCA	3	ACGGCGTGGGGTATACGCCTCGCGTCAAGCAAA	33	0.0435972698492909	62.259565	1.797	-5.114633	F	NA	NA	NA	NA	NA	NA	NA	NA	NA	NA	NA	NA	NA	NA	NA	NA	NA	NA	F	NA	NA	NA	NA	NA	NA	NA	NA	NA	NA	NA	NA	NA	NA	NA	NA	NA	NA	NA
AGATGCCGAAGCGTCAGATGGAGATCGCGCT	13	AGCGACAGCGCGATCTCCATCTGACGCTTCGGCATCTGGTGCG	43	0.0359441767193798	9.942609	1	-3.313624	F	NA	NA	NA	NA	NA	NA	NA	NA	NA	NA	NA	NA	NA	NA	NA	NA	NA	NA	F	NA	NA	NA	NA	NA	NA	NA	NA	NA	NA	NA	NA	NA	NA	NA	NA	NA	NA	NA
AGAAGGATTGCAGCGACAGCGCGTGGATCAG	10	ATCTGATCCACGCGCTGTCGCTGCAATCCTTCTACCGCGT	40	0.0310636220624459	1	12.080667	3.594628	F	NA	NA	NA	NA	NA	NA	NA	NA	NA	NA	NA	NA	NA	NA	NA	NA	NA	NA	F	NA	NA	NA	NA	NA	NA	NA	NA	NA	NA	NA	NA	NA	NA	NA	NA	NA	NA	NA
ATGGCTCACTGCACCACGTCGAGCCTGACAT	20	CCTGGTCCCGCCTGCCATGGCTCACTGCACCACGTCGAGCCTGACATTGGCT	52	0.0152788404942966	12.871739	1	-3.686135	F	NA	NA	NA	NA	NA	NA	NA	NA	NA	NA	NA	NA	NA	NA	NA	NA	NA	NA	F	NA	NA	NA	NA	NA	NA	NA	NA	NA	NA	NA	NA	NA	NA	NA	NA	NA	NA	NA
CCTCGCGGATCGTGTGAGCGGGCGGTGCGGC	17	GGATCAACGCCGCCGGCCGCACCGCCCGCTCACACGATCCGCGAGGT	47	0.031341753897541	1	7.887667	2.979599	F	NA	NA	NA	NA	NA	NA	NA	NA	NA	NA	NA	NA	NA	NA	NA	NA	NA	NA	F	NA	NA	NA	NA	NA	NA	NA	NA	NA	NA	NA	NA	NA	NA	NA	NA	NA	NA	NA
ATAGGCGTCAGCTCGGCCTTCGCCGGCAGGC	3	GCCTGCCGGCGAAGGCCGAGCTGACGCCTATAC	33	0.0346228422667448	1	6.611667	2.725014	F	NA	NA	NA	NA	NA	NA	NA	NA	NA	NA	NA	NA	NA	NA	NA	NA	NA	NA	F	NA	NA	NA	NA	NA	NA	NA	NA	NA	NA	NA	NA	NA	NA	NA	NA	NA	NA	NA
ATCCATGGACTCGAATGCAATCATCCTCGAA	7	GAATAATCCATGGACTCGAATGCAATCATCCTCGAAT	37	0.0280315102089984	65.553043	1	-6.034591	T	6842	chr1	143207110	143207146	NA	37M	0	0	0	1	0	0	F	F	1	0.972972972972973	5	1	F	NA	NA	NA	NA	NA	NA	NA	NA	NA	ENSG00000224857	-	LINC01691	21626587	ENSG00000276118	+	AC242852.1	136033	NA	NA
CGGGGAGAGTAGGCTTTGAGGCGTCAAACAC	14	AACATAATCCCGGCGGGGAGAGTAGGCTTTGAGGCGTCAAACAC	44	0.00601971269054639	1	11.307667	3.499229	F	NA	NA	NA	NA	NA	NA	NA	NA	NA	NA	NA	NA	NA	NA	NA	NA	NA	NA	F	NA	NA	NA	NA	NA	NA	NA	NA	NA	NA	NA	NA	NA	NA	NA	NA	NA	NA	NA
CGAGGTTGGTGACGTGAGCCTGTAGCACCCC	7	GTCGAGGTTGGTGACGTGAGCCTGTAGCACCCCGCCC	37	0.0471912948003045	61.406957	1.052333	-5.866739	T	13236	chr3	179114637	179114655	NA	8S19M10S	0	0	0	0	10	8	T	T	0.513513513513513	1	3	0	F	NA	ENSG00000229102	AC076966.1	-	lncRNA	NA	NA	NA	NA	NA	NA	NA	NA	NA	NA	NA	NA	F	T
AAAGCTCTCCATTCTTGACACCGAGCACGTC	51	GGTGGTAAACTTGCACTGGATTACCCAAAGCTCTCCATTCTTGACACCGAGCACGTCCGCGCCGTGATCGCCGGAACCCGC	81	0.0250793719743045	1	6.606333	2.72385	F	NA	NA	NA	NA	NA	NA	NA	NA	NA	NA	NA	NA	NA	NA	NA	NA	NA	NA	F	NA	NA	NA	NA	NA	NA	NA	NA	NA	NA	NA	NA	NA	NA	NA	NA	NA	NA	NA
CGCCGCGCCGACATGGATCGCGCGACGCGGA	7	CCAGCGCCGCGCCGACATGGATCGCGCGACGCGGATC	37	0.0171611785315097	11.991739	1	-3.583969	F	NA	NA	NA	NA	NA	NA	NA	NA	NA	NA	NA	NA	NA	NA	NA	NA	NA	NA	F	NA	NA	NA	NA	NA	NA	NA	NA	NA	NA	NA	NA	NA	NA	NA	NA	NA	NA	NA
GCGTTTGTCATCAGTTCAGGGATATGTGAAA	35	GTCACAATGTCCCCTGTAGGCAAAGGCTAGGCAAGGGTTACATCGCGTTTGTCATCAGTTCAGGGATATGTGAAAAC	77	0.02655331107739	156.244783	1.083	-7.172631	T	18427	chr4	190178345	190178421	NA	77M	0	0	0	4	0	0	F	F	1	0.948051948051948	7	4	F	NA	ENSG00000260596	DUX4	+	protein_coding	NA	NA	NA	NA	NA	NA	NA	NA	NA	NA	NA	NA	F	T
AGCAGCCCAATCACCAGCAGCGCGCAGCTCG	16	ACATCACGAGCTGCGCGCTGCTGGTGATTGGGCTGCTGCTGATGCG	46	0.0395860634264976	13.843913	2.416	-2.518559	F	NA	NA	NA	NA	NA	NA	NA	NA	NA	NA	NA	NA	NA	NA	NA	NA	NA	NA	F	NA	NA	NA	NA	NA	NA	NA	NA	NA	NA	NA	NA	NA	NA	NA	NA	NA	NA	NA
CACAGGCGAACAGATAAGGCAGCGGCTCGAC	51	CGCCGCGACCAGGGCCGCGAAGGTCGAGCCGCTGCCTTATCTGTTCGCCTGTGCATTCATCGCCAACGCCGCCAGCTTCGT	81	0.0272811704927808	10.574348	1	-3.402497	F	NA	NA	NA	NA	NA	NA	NA	NA	NA	NA	NA	NA	NA	NA	NA	NA	NA	NA	F	NA	NA	NA	NA	NA	NA	NA	NA	NA	NA	NA	NA	NA	NA	NA	NA	NA	NA	NA
GCCCCTGAGGGCACACCTCACGACCGCTAGC	19	TGCCCCTGAGGGCACACCTCACGACCGCTAGCCTCGCGCACAACCTTGC	49	0.0271897264931677	1	5.963667	2.5762	F	NA	NA	NA	NA	NA	NA	NA	NA	NA	NA	NA	NA	NA	NA	NA	NA	NA	NA	F	NA	NA	NA	NA	NA	NA	NA	NA	NA	NA	NA	NA	NA	NA	NA	NA	NA	NA	NA
CGCATGTCGGTGATGTTCGCGTCCGTGTCAG	8	TCACGACTGACACGGACGCGAACATCACCGACATGCGC	38	0.0247863821078644	1.118696	5.872333	2.392116	F	NA	NA	NA	NA	NA	NA	NA	NA	NA	NA	NA	NA	NA	NA	NA	NA	NA	NA	F	NA	NA	NA	NA	NA	NA	NA	NA	NA	NA	NA	NA	NA	NA	NA	NA	NA	NA	NA
AACAGCGGCATCGTCGCCCGTATTGCCGGCG	62	GTGCCGGGAAAATGTTACCAACAGCGGCATCGTCGCCCGTATTGCCGGCGCGACGATCGGCGCGGACGCGTTCCTGCCGAACATGGGCACCGAGGATTTCCTCTCGT	107	0.0157894265734266	15.396087	1.014	-3.924434	F	NA	NA	NA	NA	NA	NA	NA	NA	NA	NA	NA	NA	NA	NA	NA	NA	NA	NA	F	NA	NA	NA	NA	NA	NA	NA	NA	NA	NA	NA	NA	NA	NA	NA	NA	NA	NA	NA
TCCACGCCTTCGGGCCAAGCGCCGGTATGCA	29	CAACACGCTTGCCGGTCAGATCCACGCCTTCGGGCCAAGCGCCGGTATGCAGGATCTTG	59	0.0105219561403509	15.892609	1	-3.990284	F	NA	NA	NA	NA	NA	NA	NA	NA	NA	NA	NA	NA	NA	NA	NA	NA	NA	NA	F	NA	NA	NA	NA	NA	NA	NA	NA	NA	NA	NA	NA	NA	NA	NA	NA	NA	NA	NA
AGGGAAACACGTCCCTGTCGTTGAGAGCGTC	69	GAGGGAAACACGTCCCTGTCGTTGAGAGCGTCGCGCAGGACGACGAGCGCCTCGACCGGGCACCCGGCCCGTAGGGCCGTCAGTGCGCGGCGATAGAGG	99	0.0145412663215052	22.326957	1	-4.480715	F	NA	NA	NA	NA	NA	NA	NA	NA	NA	NA	NA	NA	NA	NA	NA	NA	NA	NA	F	NA	NA	NA	NA	NA	NA	NA	NA	NA	NA	NA	NA	NA	NA	NA	NA	NA	NA	NA
GACGTCCTTGTCGGCCACGATCATCATGGCC	11	AGGGAGACGTCCTTGTCGGCCACGATCATCATGGCCTCCAG	41	0.0441363086428228	1	7.637333	2.933069	F	NA	NA	NA	NA	NA	NA	NA	NA	NA	NA	NA	NA	NA	NA	NA	NA	NA	NA	F	NA	NA	NA	NA	NA	NA	NA	NA	NA	NA	NA	NA	NA	NA	NA	NA	NA	NA	NA
CCTATTATCGCCCCGGCGATCCTGCGGTCGC	6	GCCCTATTATCGCCCCGGCGATCCTGCGGTCGCAGA	36	0.0330967648450143	10.07	1.444	-2.801921	F	NA	NA	NA	NA	NA	NA	NA	NA	NA	NA	NA	NA	NA	NA	NA	NA	NA	NA	F	NA	NA	NA	NA	NA	NA	NA	NA	NA	NA	NA	NA	NA	NA	NA	NA	NA	NA	NA
AAAGACATTGTTAGAAATGGTGAAGGTGGTT	37	GGACATTCTTGATGTTCTGGGAATCGAAACCACCTTCACCATTTCTAACAATGTCTTTCTCCCCGAG	67	0.0476163514040927	77.499565	1	-6.276116	F	NA	NA	NA	NA	NA	NA	NA	NA	NA	NA	NA	NA	NA	NA	NA	NA	NA	NA	F	NA	NA	NA	NA	NA	NA	NA	NA	NA	NA	NA	NA	NA	NA	NA	NA	NA	NA	NA
ATGCGCGAAAGCCAGGAAATGGTGTTCGATG	5	TGCATCGAACACCATTTCCTGGCTTTCGCGCATGT	35	0.0340166004548901	50.061739	2.168667	-4.528828	T	7743	chr19	11887972	11887989	NA	8S18M9S	0	0	0	0	9	8	T	T	0.514285714285714	1	1	0	F	NA	ENSG00000198429	ZNF69	+	protein_coding	NA	NA	NA	NA	NA	NA	NA	NA	NA	NA	NA	NA	T	T
CGCGGCCATGGAGGCCGGTCAGCTTGAGCGC	7	CGCGCGGCCATGGAGGCCGGTCAGCTTGAGCGCGGTC	37	0.0303432246103733	12.945217	1.261667	-3.359016	F	NA	NA	NA	NA	NA	NA	NA	NA	NA	NA	NA	NA	NA	NA	NA	NA	NA	NA	F	NA	NA	NA	NA	NA	NA	NA	NA	NA	NA	NA	NA	NA	NA	NA	NA	NA	NA	NA
CGGGACGCACTCTGAAAGCTGGCGAGCATCA	4	AGCGGGACGCACTCTGAAAGCTGGCGAGCATCAC	34	0.0473294386573932	1	6.689667	2.741934	T	14789	chr2	144596250	144596268	NA	10S19M5S	0	0	0	0	5	10	T	T	0.558823529411765	1	1	0	F	NA	NA	NA	NA	NA	NA	NA	NA	NA	ENSG00000232606	+	LINC01412	16817	ENSG00000226674	+	TEX41	70043	NA	NA
CCGCCGTGCCGCTCGCGATCGTCACCGACGG	3	CACCGCCGTGCCGCTCGCGATCGTCACCGACGG	33	0.0197701659162278	10.272609	1.471333	-2.803607	F	NA	NA	NA	NA	NA	NA	NA	NA	NA	NA	NA	NA	NA	NA	NA	NA	NA	NA	F	NA	NA	NA	NA	NA	NA	NA	NA	NA	NA	NA	NA	NA	NA	NA	NA	NA	NA	NA
CGACGAAGTACGGCGAGCCTCTCAGCTCTTC	1	CGACGAAGTACGGCGAGCCTCTCAGCTCTTC	31	0.0427839346536567	11.894783	2.022	-2.556474	T	12826	chr4	54439945	54439960	NA	15S16M	0	0	0	0	0	15	F	T	0.516129032258065	1	7	0	F	NA	NA	NA	NA	NA	NA	NA	NA	NA	ENSG00000248518	+	AC098587.1	63194	ENSG00000251264	-	AC098868.1	541	NA	NA
ATGGGCGAGTACTTCCTGCCGCTGCTCGGTC	2	ACCCGAAATGACCGAGCAGCGGCAGGAAGTACTCGCCCAT	40	0.0319987398147631	20.332609	2.384333	-3.092138	F	NA	NA	NA	NA	NA	NA	NA	NA	NA	NA	NA	NA	NA	NA	NA	NA	NA	NA	F	NA	NA	NA	NA	NA	NA	NA	NA	NA	NA	NA	NA	NA	NA	NA	NA	NA	NA	NA
GATCGCTCGGTCCGCGCCCAACTCGCCACCA	9	TGACGATCGCTCGGTCCGCGCCCAACTCGCCACCAGCCTGCTCGAGC	47	0.0432712440326603	1	9.212333	3.203567	F	NA	NA	NA	NA	NA	NA	NA	NA	NA	NA	NA	NA	NA	NA	NA	NA	NA	NA	F	NA	NA	NA	NA	NA	NA	NA	NA	NA	NA	NA	NA	NA	NA	NA	NA	NA	NA	NA
CAATCCCGGGCGTCTCAAAAGCGGTCGGCTC	15	GCGCAATCCCGGGCGTCTCAAAAGCGGTCGGCTCCGGCGTACAGG	45	0.0458453431404561	8.763913	1.027667	-3.092202	F	NA	NA	NA	NA	NA	NA	NA	NA	NA	NA	NA	NA	NA	NA	NA	NA	NA	NA	F	NA	NA	NA	NA	NA	NA	NA	NA	NA	NA	NA	NA	NA	NA	NA	NA	NA	NA	NA
GCGTGAGCTATGAGAAAGCGCCACGCTTCCC	11	TACAGCGTGAGCTATGAGAAAGCGCCACGCTTCCCGAAGGG	41	0.0232561203588983	66.77	3.415667	-4.288961	F	NA	NA	NA	NA	NA	NA	NA	NA	NA	NA	NA	NA	NA	NA	NA	NA	NA	NA	F	NA	NA	NA	NA	NA	NA	NA	NA	NA	NA	NA	NA	NA	NA	NA	NA	NA	NA	NA
ATTGCTTCGCGTCGCTCGCAATGACGGGACG	16	CCGCCAATCTATCCGTCCCGTCATTGCGAGCGACGCGAAGCAATCCAT	48	0.0126163870628451	16.24087	1	-4.021557	F	NA	NA	NA	NA	NA	NA	NA	NA	NA	NA	NA	NA	NA	NA	NA	NA	NA	NA	F	NA	NA	NA	NA	NA	NA	NA	NA	NA	NA	NA	NA	NA	NA	NA	NA	NA	NA	NA
CCAAAAATCTCGAGGCCAGCCCTGCGCAGGG	29	CGTCACCAAAAATCTCGAGGCCAGCCCTGCGCAGGGTTGTCCCAGTCTCGACGACGTCAGCAAT	64	0.039670258395738	60.319565	1.091	-5.788903	F	NA	NA	NA	NA	NA	NA	NA	NA	NA	NA	NA	NA	NA	NA	NA	NA	NA	NA	F	NA	NA	NA	NA	NA	NA	NA	NA	NA	NA	NA	NA	NA	NA	NA	NA	NA	NA	NA
AGGACATCGCGCCCATCGCGTCGAACAGCAC	3	GAGGACATCGCGCCCATCGCGTCGAACAGCACC	33	0.0473634898477053	10.709565	1	-3.420828	F	NA	NA	NA	NA	NA	NA	NA	NA	NA	NA	NA	NA	NA	NA	NA	NA	NA	NA	F	NA	NA	NA	NA	NA	NA	NA	NA	NA	NA	NA	NA	NA	NA	NA	NA	NA	NA	NA
GTTGGGCCCTAATATTTAACATCAGACTTAA	9	AGGGTTGGGCCCTAATATTTAACATCAGACTTAACAAAC	39	0.045190484744359	34.933913	6.072333	-2.524305	F	NA	NA	NA	NA	NA	NA	NA	NA	NA	NA	NA	NA	NA	NA	NA	NA	NA	NA	F	NA	NA	NA	NA	NA	NA	NA	NA	NA	NA	NA	NA	NA	NA	NA	NA	NA	NA	NA
GCGGGGAAGTTTTGGCCAGTTTCTGGCTGAC	69	GCGCGGGGAAGTTTTGGCCAGTTTCTGGCTGACGATGGTGGAAAGACATCATGAGTCGAAAGACGCCGGCGAAGCGAGCTCGTACCAAGCAGAGGCGAC	99	0.0102635057903666	1	12.236667	3.613139	F	NA	NA	NA	NA	NA	NA	NA	NA	NA	NA	NA	NA	NA	NA	NA	NA	NA	NA	F	NA	NA	NA	NA	NA	NA	NA	NA	NA	NA	NA	NA	NA	NA	NA	NA	NA	NA	NA
GGATTCGCAGAATTAAATGGAAAACGACACA	1	GGATTCGCAGAATTAAATGGAAAACGACACA	31	0.0353944227644337	42.230435	3.347333	-3.657199	T	18896	chr3	5153587	5153605	NA	12S19M	0	0	0	2	0	12	F	T	0.612903225806452	0.894736842105263	1	2	F	NA	ENSG00000134108	ARL8B	+	protein_coding	NA	NA	NA	NA	NA	NA	NA	NA	NA	NA	NA	NA	F	T
CGGTTCCGCTGCGCGATGCGCGCTATCTCGC	50	AACGGCTTCGGCCGAGGCAGGATCGGGAACGAGTTGCGCGGTGCGCAGCCGTTCCGCGAGATAGCGCGCATCGCGCAGCGGAACCGCCGACTGCC	95	0.00764471141206931	37.287391	1	-5.220616	F	NA	NA	NA	NA	NA	NA	NA	NA	NA	NA	NA	NA	NA	NA	NA	NA	NA	NA	F	NA	NA	NA	NA	NA	NA	NA	NA	NA	NA	NA	NA	NA	NA	NA	NA	NA	NA	NA
CCAGCGTCGCAACGACGGGCAGACGGCCGAC	56	GAAGTATGGCCTGATCCCGGAATTCGTCGGCCGTCTGCCCGTCGTTGCGACGCTGGAGGACCTCGACGAGGCCTCGCTGAAGAAGA	86	0.0103823110213503	12.552174	1.399	-3.165469	F	NA	NA	NA	NA	NA	NA	NA	NA	NA	NA	NA	NA	NA	NA	NA	NA	NA	NA	F	NA	NA	NA	NA	NA	NA	NA	NA	NA	NA	NA	NA	NA	NA	NA	NA	NA	NA	NA
CGCCTTTGGCAGTTTCACGACCCGGTCGCCG	24	ATCGTCACGATCAACGCCGCGCCGCCTTTGGCAGTTTCACGACCCGGTCGCCGC	54	0.00507802902933172	12.995217	1	-3.699909	F	NA	NA	NA	NA	NA	NA	NA	NA	NA	NA	NA	NA	NA	NA	NA	NA	NA	NA	F	NA	NA	NA	NA	NA	NA	NA	NA	NA	NA	NA	NA	NA	NA	NA	NA	NA	NA	NA
GACGCCGAGATCAGCTTCGAGGCTTTGAATC	1	GACGCCGAGATCAGCTTCGAGGCTTTGAATC	31	0.0410574233947576	31.471304	1	-4.975965	F	NA	NA	NA	NA	NA	NA	NA	NA	NA	NA	NA	NA	NA	NA	NA	NA	NA	NA	F	NA	NA	NA	NA	NA	NA	NA	NA	NA	NA	NA	NA	NA	NA	NA	NA	NA	NA	NA
CGCGCTGTTCAACGGCATGTCGACCGCGCCG	7	TCGGACGGCGCGGTCGACATGCCGTTGAACAGCGCGA	37	0.0234159803707449	7.919565	1	-2.985421	F	NA	NA	NA	NA	NA	NA	NA	NA	NA	NA	NA	NA	NA	NA	NA	NA	NA	NA	F	NA	NA	NA	NA	NA	NA	NA	NA	NA	NA	NA	NA	NA	NA	NA	NA	NA	NA	NA
CGACCAAGCGCGGCATGGAGGCGAAGCTGGA	32	GTACGAGGCGCTGATGGCCCGCCCCGCGACCAAGCGCGGCATGGAGGCGAAGCTGGATTGAG	62	0.00658238756144964	15.03	1	-3.909773	F	NA	NA	NA	NA	NA	NA	NA	NA	NA	NA	NA	NA	NA	NA	NA	NA	NA	NA	F	NA	NA	NA	NA	NA	NA	NA	NA	NA	NA	NA	NA	NA	NA	NA	NA	NA	NA	NA
ACGCTCATGTCGACCACAACCCACGCACCGA	10	AGCACGCTCATGTCGACCACAACCCACGCACCGAAAGCCA	40	0.031843847721283	11.689565	2.718333	-2.104427	F	NA	NA	NA	NA	NA	NA	NA	NA	NA	NA	NA	NA	NA	NA	NA	NA	NA	NA	F	NA	NA	NA	NA	NA	NA	NA	NA	NA	NA	NA	NA	NA	NA	NA	NA	NA	NA	NA
CACGAGCCGGGCGGCCGGGACGACGAGATGG	26	ACCCGCATCGACCGGCACGAGCCGGGCGGCCGGGACGACGAGATGGGAAGCGGCGC	56	0.0364947000247112	10.04	1.062333	-3.240451	F	NA	NA	NA	NA	NA	NA	NA	NA	NA	NA	NA	NA	NA	NA	NA	NA	NA	NA	F	NA	NA	NA	NA	NA	NA	NA	NA	NA	NA	NA	NA	NA	NA	NA	NA	NA	NA	NA
CGTCGTAACAACATACTACAGGAGATCCGAA	36	GGAAGGCAAGGAGTACGAGAACGTCGTAACAACATACTACAGGAGATCCGAATGATAGCAGGTGCG	66	0.00388660348319158	60.361304	2.029667	-4.894309	F	NA	NA	NA	NA	NA	NA	NA	NA	NA	NA	NA	NA	NA	NA	NA	NA	NA	NA	F	NA	NA	NA	NA	NA	NA	NA	NA	NA	NA	NA	NA	NA	NA	NA	NA	NA	NA	NA
ACGGAACGCTTGAGGCCAAGCACGATGCGGA	52	CACTGGCAGAGTCAACGGAACGCTTGAGGCCAAGCACGATGCGGAAGTCCGACAAGGAACGTGCCGTCGATCAACTCGAATACGAGCGCC	90	0.0153757070619006	30.75	2.078667	-3.886856	F	NA	NA	NA	NA	NA	NA	NA	NA	NA	NA	NA	NA	NA	NA	NA	NA	NA	NA	F	NA	NA	NA	NA	NA	NA	NA	NA	NA	NA	NA	NA	NA	NA	NA	NA	NA	NA	NA
AATTCGATCGTGCCCTTCTGCGGATCGAGGA	17	GCATCCTCGATCCGCAGAAGGGCACGATCGAATTCCTCGGCAAGCCG	47	0.0321851203645108	7.766957	1.034667	-2.908183	F	NA	NA	NA	NA	NA	NA	NA	NA	NA	NA	NA	NA	NA	NA	NA	NA	NA	NA	F	NA	NA	NA	NA	NA	NA	NA	NA	NA	NA	NA	NA	NA	NA	NA	NA	NA	NA	NA
CTTGGCAGAACAACTGGCACACCAGAGGTTA	10	CTTGGCAGAACAACTGGCACACCAGAGGTTAGTCCATCCC	40	0.00992806253592367	7.702609	1	-2.945347	F	NA	NA	NA	NA	NA	NA	NA	NA	NA	NA	NA	NA	NA	NA	NA	NA	NA	NA	F	NA	NA	NA	NA	NA	NA	NA	NA	NA	NA	NA	NA	NA	NA	NA	NA	NA	NA	NA
AACGGCGAGTTCCCGGGCACCGCAATTGTCC	1	AACGGCGAGTTCCCGGGCACCGCAATTGTCC	31	0.0344039957538005	13.589565	1	-3.764427	T	731	chr17	78878388	78878404	NA	7S17M7S	0	0	0	0	7	7	T	T	0.548387096774194	1	1	0	F	NA	ENSG00000178404	CEP295NL	-	protein_coding	NA	NA	NA	NA	NA	NA	NA	NA	NA	NA	NA	NA	F	T
ACGACTTCGTCGAGAAGAACCTCACATTCCT	9	CCAGCAAGGAATGTGAGGTTCTTCTCGACGAAGTCGTCG	39	0.0449104561684484	60.677391	1	-5.923087	F	NA	NA	NA	NA	NA	NA	NA	NA	NA	NA	NA	NA	NA	NA	NA	NA	NA	NA	F	NA	NA	NA	NA	NA	NA	NA	NA	NA	NA	NA	NA	NA	NA	NA	NA	NA	NA	NA
CGCGGCCAGGATCGCGCCGCGCTTCCAGGAA	9	ATTCCTGGAAGCGCGGCGCGATCCTGGCCGCGGCGAAAC	39	0.0365717498214468	57.526522	1.182	-5.604925	T	14124	chr7	127253067	127253086	NA	5S20M14S	0	0	0	0	14	5	T	T	0.512820512820513	1	1	0	F	NA	ENSG00000179603	GRM8	-	protein_coding	NA	NA	NA	NA	NA	NA	NA	NA	NA	NA	NA	NA	T	F
GCCGGCCTTGGCGGCGGCCTGCGACCAGACC	4	GCAGGTCTGGTCGCAGGCCGCCGCCAAGGCCGGC	34	0.0491368761631399	18.105652	2.056	-3.138528	F	NA	NA	NA	NA	NA	NA	NA	NA	NA	NA	NA	NA	NA	NA	NA	NA	NA	NA	F	NA	NA	NA	NA	NA	NA	NA	NA	NA	NA	NA	NA	NA	NA	NA	NA	NA	NA	NA
CTTTCCATTGCAATCGAGTTGATTCCATTCC	1	CTTTCCATTGCAATCGAGTTGATTCCATTCC	31	0.0465976429865029	61.357826	1	-5.939175	T	16191	chr4	49149750	49149780	NA	31M	0	0	0	2	0	0	F	F	1	0.935483870967742	4	2	F	NA	NA	NA	NA	NA	NA	NA	NA	NA	ENSG00000109182	+	CWH43	87670	ENSG00000249828	-	AC118282.3	53390	NA	NA
CGAAACGCACCGTGAAAGCCCTCCTCAACAA	26	GGAAAAAGCCGTCATGGCGAAACGCACCGTGAAAGCCCTCCTCAACAAGCGGATCC	56	0.0348644686399147	53.276957	1	-5.73544	F	NA	NA	NA	NA	NA	NA	NA	NA	NA	NA	NA	NA	NA	NA	NA	NA	NA	NA	F	NA	NA	NA	NA	NA	NA	NA	NA	NA	NA	NA	NA	NA	NA	NA	NA	NA	NA	NA
CCTGGTCTCCGCCGCGATGGCGCTATTGACC	70	TGGTGGCGCCGGAGCCGAGCTTGAAATAGGTAGACACCTCGGCGGCCGCGGCCTTCATCGAGGTCAATAGCGCCATCGCGGCGGAGACCAGGCCGCCGAC	100	0.0417336041557605	37.679565	1	-5.23571	F	NA	NA	NA	NA	NA	NA	NA	NA	NA	NA	NA	NA	NA	NA	NA	NA	NA	NA	F	NA	NA	NA	NA	NA	NA	NA	NA	NA	NA	NA	NA	NA	NA	NA	NA	NA	NA	NA
AGATTGCTGGGCTTCTCGTAGATGGTGATCG	3	ACAGATTGCTGGGCTTCTCGTAGATGGTGATCG	33	0.0353227877300613	4.637391	1	-2.213313	T	4427	chr6	8328055	8328071	NA	17M16S	0	0	0	0	16	0	T	F	0.515151515151515	1	5	0	F	NA	ENSG00000232234	AL355499.1	+	lncRNA	NA	NA	NA	NA	NA	NA	NA	NA	NA	NA	NA	NA	T	F
AATCAAGCGCGTCCGGCGTGATGATCACGAT	22	CTCCGCTAAATCAAGCGCGTCCGGCGTGATGATCACGATAGAAGACACGGGA	52	0.027340257967484	19.334348	1	-4.273094	F	NA	NA	NA	NA	NA	NA	NA	NA	NA	NA	NA	NA	NA	NA	NA	NA	NA	NA	F	NA	NA	NA	NA	NA	NA	NA	NA	NA	NA	NA	NA	NA	NA	NA	NA	NA	NA	NA
CGGCATCGAGATAGATCGAGAAGTCGAAAAA	42	GCTCGACATACCAGGACTGGATGTCGGCCTCGTCGGCATCGAGATAGATCGAGAAGTCGAAAAAATCCGACA	72	0.00268720918510221	1	12.732333	3.670425	F	NA	NA	NA	NA	NA	NA	NA	NA	NA	NA	NA	NA	NA	NA	NA	NA	NA	NA	F	NA	NA	NA	NA	NA	NA	NA	NA	NA	NA	NA	NA	NA	NA	NA	NA	NA	NA	NA
CAGCAGATAGGCGGCGCCGATCACCCGACCG	11	AACGGCAGCAGATAGGCGGCGCCGATCACCCGACCGAGCAG	41	0.0233147147704753	48.431739	1.521333	-4.992545	F	NA	NA	NA	NA	NA	NA	NA	NA	NA	NA	NA	NA	NA	NA	NA	NA	NA	NA	F	NA	NA	NA	NA	NA	NA	NA	NA	NA	NA	NA	NA	NA	NA	NA	NA	NA	NA	NA
GCTCTCCCAGTGACTCGGCGCTGCCCTTGAC	9	GTCTGCTCTCCCAGTGACTCGGCGCTGCCCTTGACGCTC	39	0.0261240774673773	6.309565	1	-2.657541	F	NA	NA	NA	NA	NA	NA	NA	NA	NA	NA	NA	NA	NA	NA	NA	NA	NA	NA	F	NA	NA	NA	NA	NA	NA	NA	NA	NA	NA	NA	NA	NA	NA	NA	NA	NA	NA	NA
CGCCATGTTCTGGCTCTCAGGGGCCAACGAC	3	CGCCATGTTCTGGCTCTCAGGGGCCAACGACAT	33	0.0307489060882425	91.096522	1	-6.509324	F	NA	NA	NA	NA	NA	NA	NA	NA	NA	NA	NA	NA	NA	NA	NA	NA	NA	NA	F	NA	NA	NA	NA	NA	NA	NA	NA	NA	NA	NA	NA	NA	NA	NA	NA	NA	NA	NA
CAGGTCGATCGCGTGCGCAGCGTGCTCAGGA	6	TCCTGAGCACGCTGCGCACGCGATCGACCTGCCAGC	36	0.0411190555304369	42.268261	2.407	-4.134267	F	NA	NA	NA	NA	NA	NA	NA	NA	NA	NA	NA	NA	NA	NA	NA	NA	NA	NA	F	NA	NA	NA	NA	NA	NA	NA	NA	NA	NA	NA	NA	NA	NA	NA	NA	NA	NA	NA
AGCTCGACGGCATGAGCGGTGGCGCGCTGGA	26	GGGCCATCGCCGCCGAGCGGCGCAAGCTCGACGGCATGAGCGGTGGCGCGCTGGAG	56	0.0444495266242775	13.58913	1	-3.764381	F	NA	NA	NA	NA	NA	NA	NA	NA	NA	NA	NA	NA	NA	NA	NA	NA	NA	NA	F	NA	NA	NA	NA	NA	NA	NA	NA	NA	NA	NA	NA	NA	NA	NA	NA	NA	NA	NA
GGCGCGCGGCGGGGCACGCGCCCTCCCGCAC	1	GGCGCGCGGCGGGGCACGCGCCCTCCCGCAC	31	0.0453751419173097	1.433913	6.697667	2.223701	T	19039	chr21	8218694	8218724	NA	31M	0	0	0	1	0	0	F	F	1	0.967741935483871	2	1	F	NA	ENSG00000278996	FP671120.2	+	lncRNA	NA	NA	NA	NA	NA	NA	NA	NA	NA	NA	NA	NA	F	T
ATCGTGGTCAGCGGCGAGCGGAGGATCTACG	24	CCTGGACGTCGTAGATCCTCCGCTCGCCGCTGACCACGATCGGCAGCCGCGCGG	54	0.0426790220387949	1	6.577667	2.717576	F	NA	NA	NA	NA	NA	NA	NA	NA	NA	NA	NA	NA	NA	NA	NA	NA	NA	NA	F	NA	NA	NA	NA	NA	NA	NA	NA	NA	NA	NA	NA	NA	NA	NA	NA	NA	NA	NA
ACGCGGCTTCGCGCTTTGCTCAGGTCAATCC	12	GGCCATGAACGCGGCTTCGCGCTTTGCTCAGGTCAATCCTTC	42	0.038300472401583	8.078261	1	-3.014045	F	NA	NA	NA	NA	NA	NA	NA	NA	NA	NA	NA	NA	NA	NA	NA	NA	NA	NA	F	NA	NA	NA	NA	NA	NA	NA	NA	NA	NA	NA	NA	NA	NA	NA	NA	NA	NA	NA
CCTCGTCGACGACCGGGACGCCACCGACGTC	7	CCTCGTCGACGACCGGGACGCCACCGACGTCATGTGG	37	0.022586932382311	61.473913	1.146667	-5.744456	F	NA	NA	NA	NA	NA	NA	NA	NA	NA	NA	NA	NA	NA	NA	NA	NA	NA	NA	F	NA	NA	NA	NA	NA	NA	NA	NA	NA	NA	NA	NA	NA	NA	NA	NA	NA	NA	NA
CGACGGTGGATCTTATCACTCATCGTCTGAC	6	TCGACGGTGGATCTTATCACTCATCGTCTGACTCCC	36	0.027495770773639	18.758696	1	-4.229488	F	NA	NA	NA	NA	NA	NA	NA	NA	NA	NA	NA	NA	NA	NA	NA	NA	NA	NA	F	NA	NA	NA	NA	NA	NA	NA	NA	NA	NA	NA	NA	NA	NA	NA	NA	NA	NA	NA
TCCGCGAGGAAGCACCGATCTGGTTCTTCAA	22	CTTGTTGTAGTTGAAGAACCAGATCGGTGCTTCCTCGCGGAGCAGAGCATTG	52	0.0207579169527392	18.783913	1	-4.231426	F	NA	NA	NA	NA	NA	NA	NA	NA	NA	NA	NA	NA	NA	NA	NA	NA	NA	NA	F	NA	NA	NA	NA	NA	NA	NA	NA	NA	NA	NA	NA	NA	NA	NA	NA	NA	NA	NA
ACCGATTTGGGTTGACCAGCGTCTTGGAACA	3	ACCGATTTGGGTTGACCAGCGTCTTGGAACAGT	33	0.0431026974570735	1.272609	9.245667	2.860988	F	NA	NA	NA	NA	NA	NA	NA	NA	NA	NA	NA	NA	NA	NA	NA	NA	NA	NA	F	NA	NA	NA	NA	NA	NA	NA	NA	NA	NA	NA	NA	NA	NA	NA	NA	NA	NA	NA
AGTGGTCGTAGGCGACCGAATGTCGTCCAGG	19	CACCGCGGATGTATGCAGTGGTCGTAGGCGACCGAATGTCGTCCAGGGCAG	51	0.0293340554096976	1	5.696	2.509949	F	NA	NA	NA	NA	NA	NA	NA	NA	NA	NA	NA	NA	NA	NA	NA	NA	NA	NA	F	NA	NA	NA	NA	NA	NA	NA	NA	NA	NA	NA	NA	NA	NA	NA	NA	NA	NA	NA
GACGTAAGTTACGTAGGCACAGCTCTTAGCA	4	GGACGTAAGTTACGTAGGCACAGCTCTTAGCAAC	34	0.0405209865870739	59.861304	2.690667	-4.475588	T	16732	chr16	69456890	69456908	NA	19M15S	0	0	0	1	15	0	T	F	0.558823529411765	0.947368421052632	1	1	F	NA	ENSG00000103018	CYB5B	+	protein_coding	NA	NA	NA	NA	NA	NA	NA	NA	NA	NA	NA	NA	F	T
GCATGAAGTCGGAATCGCTAGTAATCGCGGA	2	CCTGCATGAAGTCGGAATCGCTAGTAATCGCGGA	34	0.00507802902933172	74.028696	28.581	-1.373028	F	NA	NA	NA	NA	NA	NA	NA	NA	NA	NA	NA	NA	NA	NA	NA	NA	NA	NA	F	NA	NA	NA	NA	NA	NA	NA	NA	NA	NA	NA	NA	NA	NA	NA	NA	NA	NA	NA
GAACCATGAGCAATGGCGATCTCCAGATCCC	5	GGGATCTGGAGATCGCCATTGCTCATGGTTCCACC	35	0.0435436598242119	40.811304	1.042	-5.291542	F	NA	NA	NA	NA	NA	NA	NA	NA	NA	NA	NA	NA	NA	NA	NA	NA	NA	NA	F	NA	NA	NA	NA	NA	NA	NA	NA	NA	NA	NA	NA	NA	NA	NA	NA	NA	NA	NA
GACGGCTACATCGACATCGCGTTCGTCTACA	1	GACGGCTACATCGACATCGCGTTCGTCTACA	31	0.0457948508331038	1.057391	5.304	2.326572	F	NA	NA	NA	NA	NA	NA	NA	NA	NA	NA	NA	NA	NA	NA	NA	NA	NA	NA	F	NA	NA	NA	NA	NA	NA	NA	NA	NA	NA	NA	NA	NA	NA	NA	NA	NA	NA	NA
CTTCGAATCCCGTCCCCACCAGAATGTGTAC	9	AGCCAACGCGAGCCAGCAGTACACATTCTGGTGGGGACGGGATTCGAAG	49	0.0345308819997614	32.272174	2.062	-3.968175	F	NA	NA	NA	NA	NA	NA	NA	NA	NA	NA	NA	NA	NA	NA	NA	NA	NA	NA	F	NA	NA	NA	NA	NA	NA	NA	NA	NA	NA	NA	NA	NA	NA	NA	NA	NA	NA	NA
AAAGCGTAGTCGACCGTGACGAAGTACCAGC	1	AAAGCGTAGTCGACCGTGACGAAGTACCAGC	31	0.0487951347113553	14.572609	1.128	-3.69142	F	NA	NA	NA	NA	NA	NA	NA	NA	NA	NA	NA	NA	NA	NA	NA	NA	NA	NA	F	NA	NA	NA	NA	NA	NA	NA	NA	NA	NA	NA	NA	NA	NA	NA	NA	NA	NA	NA
GAGCCCCGACGATGTGCTGCTGAAGCCGCTA	9	GGATGGAATAGCGGCTTCAGCAGCACATCGTCGGGGCTC	39	0.0282583002300309	9.768261	1	-3.288102	F	NA	NA	NA	NA	NA	NA	NA	NA	NA	NA	NA	NA	NA	NA	NA	NA	NA	NA	F	NA	NA	NA	NA	NA	NA	NA	NA	NA	NA	NA	NA	NA	NA	NA	NA	NA	NA	NA
CCTGTCCGTTCGACATGACCGGAAGCCCGAC	31	GGAAGCGTCACGGTCGGGCTTCCGGTCATGTCGAACGGACAGGTGAAGCGCAGCAGCCCGG	61	0.00340365003546938	20.065217	1	-4.326625	F	NA	NA	NA	NA	NA	NA	NA	NA	NA	NA	NA	NA	NA	NA	NA	NA	NA	NA	F	NA	NA	NA	NA	NA	NA	NA	NA	NA	NA	NA	NA	NA	NA	NA	NA	NA	NA	NA
AGGTGTTGACGCAGTATCTCGAAGACGGTCG	71	ATGGACGTGCGCGGTCGCTGGCTTTTGCTCGTGCTGGCCAAGGTGTTGACGCAGTATCTCGAAGACGGTCGCGTGAAGCATGGCGAGCTCTCGGGCGAGCG	101	0	29.331304	2.882333	-3.347132	F	NA	NA	NA	NA	NA	NA	NA	NA	NA	NA	NA	NA	NA	NA	NA	NA	NA	NA	F	NA	NA	NA	NA	NA	NA	NA	NA	NA	NA	NA	NA	NA	NA	NA	NA	NA	NA	NA
GGATTCATAGCCGGTTTTACGGATGATGACC	23	GGGAGGGATAGGCAAGGGTCATCATCCGTAAAACCGGCTATGAATCCCGCCACGCG	56	0.0279047458128578	1.549565	6.257	2.013608	F	NA	NA	NA	NA	NA	NA	NA	NA	NA	NA	NA	NA	NA	NA	NA	NA	NA	NA	F	NA	NA	NA	NA	NA	NA	NA	NA	NA	NA	NA	NA	NA	NA	NA	NA	NA	NA	NA
CCGCGATCTGGCGAAAGGCATTGCGGATCGA	26	GCCGTCGATCCGCAATGCCTTTCGCCAGATCGCGGAAGCGTCGCGTCGGGTCACGG	56	0.0137694389498578	1	7.155333	2.839019	F	NA	NA	NA	NA	NA	NA	NA	NA	NA	NA	NA	NA	NA	NA	NA	NA	NA	NA	F	NA	NA	NA	NA	NA	NA	NA	NA	NA	NA	NA	NA	NA	NA	NA	NA	NA	NA	NA
GCACCCGCCTGACACTGACCACGGCGGCGGC	14	CCGGCGAGGGCACCCGCCTGACACTGACCACGGCGGCGGCCGAA	44	0.0471474323226832	16.463913	1.383	-3.573434	F	NA	NA	NA	NA	NA	NA	NA	NA	NA	NA	NA	NA	NA	NA	NA	NA	NA	NA	F	NA	NA	NA	NA	NA	NA	NA	NA	NA	NA	NA	NA	NA	NA	NA	NA	NA	NA	NA
ACGCGTGGATTCGACGTCACGACACCATCGA	20	GCCGGGGACGCGTGGATTCGACGTCACGACACCATCGAGGATCGCATCTGCTGCTGCGGTAAA	63	0.019371108668363	26.981304	1.668667	-4.015192	F	NA	NA	NA	NA	NA	NA	NA	NA	NA	NA	NA	NA	NA	NA	NA	NA	NA	NA	F	NA	NA	NA	NA	NA	NA	NA	NA	NA	NA	NA	NA	NA	NA	NA	NA	NA	NA	NA
GCGGCCGTACTTGCCGCGCCCAGACTGGCCC	9	AGCGGGCCAGTCTGGGCGCGGCAAGTACGGCCGCGGCGGG	40	0.0162404960327055	29.342609	1	-4.874925	F	NA	NA	NA	NA	NA	NA	NA	NA	NA	NA	NA	NA	NA	NA	NA	NA	NA	NA	F	NA	NA	NA	NA	NA	NA	NA	NA	NA	NA	NA	NA	NA	NA	NA	NA	NA	NA	NA
GATGACCAGCATAATGCTTGATGCCCAGCAA	4	GATGACCAGCATAATGCTTGATGCCCAGCAAATC	34	0.0371197673879943	43.330435	2.454667	-4.141781	F	NA	NA	NA	NA	NA	NA	NA	NA	NA	NA	NA	NA	NA	NA	NA	NA	NA	NA	F	NA	NA	NA	NA	NA	NA	NA	NA	NA	NA	NA	NA	NA	NA	NA	NA	NA	NA	NA
CGGCTCGCCGGATACCGGCGGAAATGAACCG	51	CCGACGGCCCGCTAGATGTCGGCTCGCCGGATACCGGCGGAAATGAACCGGGCCGTTGATCCGGCAGGTGTGACGAAAGAAA	82	0.00542301441085052	8.437826	1.041667	-3.017977	F	NA	NA	NA	NA	NA	NA	NA	NA	NA	NA	NA	NA	NA	NA	NA	NA	NA	NA	F	NA	NA	NA	NA	NA	NA	NA	NA	NA	NA	NA	NA	NA	NA	NA	NA	NA	NA	NA
CGGTTTCGGGTACGGTCTCACGTGGAGGCTC	2	AGAGCCTCCACGTGAGACCGTACCCGAAACCG	32	0.0496213565278997	28.390435	4.402333	-2.689065	T	14997	chr20	48238504	48238519	NA	16S16M	0	0	0	0	0	16	F	T	0.5	1	1	0	F	NA	NA	NA	NA	NA	NA	NA	NA	NA	ENSG00000287107	+	AL136102.1	101661	ENSG00000288083	-	AL121888.2	26449	NA	NA
ACGAAACCCGCCTTCCGCAAGGTGGATTGGC	12	GACGAAACCCGCCTTCCGCAAGGTGGATTGGCTCGCACGTGA	42	0.0310963802243457	1	11.705	3.549053	F	NA	NA	NA	NA	NA	NA	NA	NA	NA	NA	NA	NA	NA	NA	NA	NA	NA	NA	F	NA	NA	NA	NA	NA	NA	NA	NA	NA	NA	NA	NA	NA	NA	NA	NA	NA	NA	NA
GTCCGTGTCTCAGTACCAGTGTGGGGGATCA	9	GTCCGTGTCTCAGTACCAGTGTGGGGGATCACCCTCTCA	39	0.0225355548300255	161.850435	7.219333	-4.486652	F	NA	NA	NA	NA	NA	NA	NA	NA	NA	NA	NA	NA	NA	NA	NA	NA	NA	NA	F	NA	NA	NA	NA	NA	NA	NA	NA	NA	NA	NA	NA	NA	NA	NA	NA	NA	NA	NA
TGAGGATCGGGGTCGATCGCAGCTACACCCA	5	TGAGGATCGGGGTCGATCGCAGCTACACCCAGGAC	35	0.0352511500401791	1	6.045333	2.595822	F	NA	NA	NA	NA	NA	NA	NA	NA	NA	NA	NA	NA	NA	NA	NA	NA	NA	NA	F	NA	NA	NA	NA	NA	NA	NA	NA	NA	NA	NA	NA	NA	NA	NA	NA	NA	NA	NA
CGAAGTGGATGCAGCGCACGCGCCGCGCTGC	10	AGCGAAGTGGATGCAGCGCACGCGCCGCGCTGCATCCGAC	40	0.0329377252414245	1	8.075333	3.013522	F	NA	NA	NA	NA	NA	NA	NA	NA	NA	NA	NA	NA	NA	NA	NA	NA	NA	NA	F	NA	NA	NA	NA	NA	NA	NA	NA	NA	NA	NA	NA	NA	NA	NA	NA	NA	NA	NA
CCTCGCTGATCTGACCGACGAACTCGTTTCC	36	CCGGGTTCCAATCCGGTCCTCAGCACGCTGGGAAACGAGTTCGTCGGTCAGATCAGCGAGGTCTTCG	67	0.0420540790135507	41.892174	1.091	-5.262958	F	NA	NA	NA	NA	NA	NA	NA	NA	NA	NA	NA	NA	NA	NA	NA	NA	NA	NA	F	NA	NA	NA	NA	NA	NA	NA	NA	NA	NA	NA	NA	NA	NA	NA	NA	NA	NA	NA
CTGGCGGACTGGAGCCCTCGCTTCGACGATC	25	CGGGAACGCGTCGCCGGTCAGGGTAGTAGAGGTGAAGATCGTCGAAGCGAGGGCTCCAGTCCGCCAG	67	0.0208335520429839	1.099565	11.497333	3.386294	F	NA	NA	NA	NA	NA	NA	NA	NA	NA	NA	NA	NA	NA	NA	NA	NA	NA	NA	F	NA	NA	NA	NA	NA	NA	NA	NA	NA	NA	NA	NA	NA	NA	NA	NA	NA	NA	NA
CGCCATGTGCCTGAAACCGTGGACCGCGAAA	3	CGCCATGTGCCTGAAACCGTGGACCGCGAAACT	33	0.0327839317021438	40.422609	1	-5.337091	F	NA	NA	NA	NA	NA	NA	NA	NA	NA	NA	NA	NA	NA	NA	NA	NA	NA	NA	F	NA	NA	NA	NA	NA	NA	NA	NA	NA	NA	NA	NA	NA	NA	NA	NA	NA	NA	NA
CATGTTTCGGGGCGATGCTGTCACGTCGCCC	6	GGGCGACGTGACAGCATCGCCCCGAAACATGGGCCG	36	0.0409637192706826	38.557391	3.198333	-3.591615	F	NA	NA	NA	NA	NA	NA	NA	NA	NA	NA	NA	NA	NA	NA	NA	NA	NA	NA	F	NA	NA	NA	NA	NA	NA	NA	NA	NA	NA	NA	NA	NA	NA	NA	NA	NA	NA	NA
TGGACTTGCCGCAGCCGGACGGGCCGACGAA	31	CCGGCGAGCATTCGCAACGTCGTGGACTTGCCGCAGCCGGACGGGCCGACGAACACGACCA	61	0.0047321561601052	1	10.889333	3.444844	F	NA	NA	NA	NA	NA	NA	NA	NA	NA	NA	NA	NA	NA	NA	NA	NA	NA	NA	F	NA	NA	NA	NA	NA	NA	NA	NA	NA	NA	NA	NA	NA	NA	NA	NA	NA	NA	NA
CGTCGACTGCTATTTGCTGTGGCGCCTCACC	84	GCGAGCGCGCCGAGCGCGGCGAGCTGTTGTTCGGCACCGTCGACTGCTATTTGCTGTGGCGCCTCACCGGCGGTCGGGTGCACGCCACCGACGCCACCAATGCCTCGCGCACGCTGCTGTT	121	0.0102635057903666	1	9.694667	3.277191	F	NA	NA	NA	NA	NA	NA	NA	NA	NA	NA	NA	NA	NA	NA	NA	NA	NA	NA	F	NA	NA	NA	NA	NA	NA	NA	NA	NA	NA	NA	NA	NA	NA	NA	NA	NA	NA	NA
GGATGACCTGTGGGTCGGAGTGAAAGGCTAA	1	GGATGACCTGTGGGTCGGAGTGAAAGGCTAA	31	0.0464642880864091	43.761304	4.719667	-3.212899	F	NA	NA	NA	NA	NA	NA	NA	NA	NA	NA	NA	NA	NA	NA	NA	NA	NA	NA	F	NA	NA	NA	NA	NA	NA	NA	NA	NA	NA	NA	NA	NA	NA	NA	NA	NA	NA	NA
GACTGGACGTCGGCGACGCTCCGGTTTTCAA	12	CGACTGGACGTCGGCGACGCTCCGGTTTTCAAGGTATTTCGA	42	0.0455853290817987	5.476087	1.095333	-2.321776	F	NA	NA	NA	NA	NA	NA	NA	NA	NA	NA	NA	NA	NA	NA	NA	NA	NA	NA	F	NA	NA	NA	NA	NA	NA	NA	NA	NA	NA	NA	NA	NA	NA	NA	NA	NA	NA	NA
GGAGAGATAGTGATAGCGCGCGGCCGCGACC	7	GTTGGAGAGATAGTGATAGCGCGCGGCCGCGACCGCC	37	0.0257611382550336	10.006087	1	-3.322806	F	NA	NA	NA	NA	NA	NA	NA	NA	NA	NA	NA	NA	NA	NA	NA	NA	NA	NA	F	NA	NA	NA	NA	NA	NA	NA	NA	NA	NA	NA	NA	NA	NA	NA	NA	NA	NA	NA
AGACCGCACCAGAATCCATCGTCGGCATCGG	34	GGATGAGAAGACAGCTCCTGAGCCGTTTACGCCGATGCCGACGATGGATTCTGGTGCGGTCTCC	64	0.0426790220387949	53.258261	1	-5.734933	F	NA	NA	NA	NA	NA	NA	NA	NA	NA	NA	NA	NA	NA	NA	NA	NA	NA	NA	F	NA	NA	NA	NA	NA	NA	NA	NA	NA	NA	NA	NA	NA	NA	NA	NA	NA	NA	NA
AGCGCATGTCGGTGGAGCCCTTGCCGCCCTC	3	TCAGCGCATGTCGGTGGAGCCCTTGCCGCCCTC	33	0.0387608729236524	5.317391	14.569667	1.454177	T	4917	KI270816.1	283993	284012	NA	13S20M	0	0	0	1	0	13	F	T	0.606060606060606	0.95	1	1	F	NA	NA	NA	NA	NA	NA	NA	NA	NA	NA	NA	NA	NA	NA	NA	NA	NA	NA	NA
AGATGGGCCTGGTCTCTCACGCCCCACGCAG	20	CGGCCTGGATGGTCGCGCTGCGTGGGGCGTGAGAGACCAGGCCCATCTCGC	51	0.0337201999431665	33.325217	1	-5.058542	F	NA	NA	NA	NA	NA	NA	NA	NA	NA	NA	NA	NA	NA	NA	NA	NA	NA	NA	F	NA	NA	NA	NA	NA	NA	NA	NA	NA	NA	NA	NA	NA	NA	NA	NA	NA	NA	NA
CGGGCCTCACCCGATCCCTGCTTATTTCCGC	7	CATTGCGGAAATAAGCAGGGATCGGGTGAGGCCCGGCCGGATCATGGGAGGATAC	55	0.0300651659303328	12.73087	2.111333	-2.592105	F	NA	NA	NA	NA	NA	NA	NA	NA	NA	NA	NA	NA	NA	NA	NA	NA	NA	NA	F	NA	NA	NA	NA	NA	NA	NA	NA	NA	NA	NA	NA	NA	NA	NA	NA	NA	NA	NA
CCTGTGGCGCAGTGACGTCAGGGCCGGAAAG	16	GTTCGCATCGCCCAACTTTCCGGCCCTGACGTCACTGCGCCACAGG	46	0.0398094276094276	39.445652	3.817333	-3.369229	F	NA	NA	NA	NA	NA	NA	NA	NA	NA	NA	NA	NA	NA	NA	NA	NA	NA	NA	F	NA	NA	NA	NA	NA	NA	NA	NA	NA	NA	NA	NA	NA	NA	NA	NA	NA	NA	NA
ATAAATCTCCTGGCTGATCTCCTCAGCCAAC	76	TGGATGGCAGCTGAGCACGAGGGCAATGAACGGTTGGCTGAGGAGATCAGCCAGGAGATTTATCACCTGCAGGTCATGATGATTAAGCAGGGCTTGTCGCTCGACG	106	0.00573658027233477	52.694783	1	-5.719588	F	NA	NA	NA	NA	NA	NA	NA	NA	NA	NA	NA	NA	NA	NA	NA	NA	NA	NA	F	NA	NA	NA	NA	NA	NA	NA	NA	NA	NA	NA	NA	NA	NA	NA	NA	NA	NA	NA
ACTGGTGCGGCAGCGTGGTCCGACGACGGAC	6	GCTGAACTGGTGCGGCAGCGTGGTCCGACGACGGAC	36	0.0353227877300613	46.80913	10.871	-2.106305	F	NA	NA	NA	NA	NA	NA	NA	NA	NA	NA	NA	NA	NA	NA	NA	NA	NA	NA	F	NA	NA	NA	NA	NA	NA	NA	NA	NA	NA	NA	NA	NA	NA	NA	NA	NA	NA	NA
ATCTACGACAACATGAAGACCGCGGTGGAGA	3	CATCTACGACAACATGAAGACCGCGGTGGAGAC	33	0.0491207165157409	14.601304	2.615	-2.481214	T	7383	chr5	1883684	1883700	NA	17M16S	0	0	0	1	16	0	T	F	0.515151515151515	0.941176470588235	1	1	F	NA	ENSG00000113430	IRX4	-	protein_coding	NA	NA	NA	NA	NA	NA	NA	NA	NA	NA	NA	NA	F	T
ACTATCGCTACAAGGACTATGGCGGCTTCCT	17	CGACTATCGCTACAAGGACTATGGCGGCTTCCTGAAGCTGACCGACG	47	0.0440194723912252	9.562174	1	-3.257339	F	NA	NA	NA	NA	NA	NA	NA	NA	NA	NA	NA	NA	NA	NA	NA	NA	NA	NA	F	NA	NA	NA	NA	NA	NA	NA	NA	NA	NA	NA	NA	NA	NA	NA	NA	NA	NA	NA
CGACCATGACCGGACGACGCGCAGCTATCTA	24	CAGCGCGACGCGGACGGTCGGTAGATAGCTGCGCGTCGTCCGGTCATGGTCGAG	54	0.0437709614238904	25.901304	1	-4.694953	F	NA	NA	NA	NA	NA	NA	NA	NA	NA	NA	NA	NA	NA	NA	NA	NA	NA	NA	F	NA	NA	NA	NA	NA	NA	NA	NA	NA	NA	NA	NA	NA	NA	NA	NA	NA	NA	NA
CCGTACCCTTCTGGTCCAGTTTCTGCGCGAA	2	CCGTACCCTTCTGGTCCAGTTTCTGCGCGAAA	32	0.0488933866873928	9.166522	1.048667	-3.127818	T	11560	chr21	24495934	24495953	NA	12S20M	0	0	0	2	0	12	F	T	0.625	0.9	1	2	F	NA	ENSG00000237484	LINC01684	+	lncRNA	NA	NA	NA	NA	NA	NA	NA	NA	NA	NA	NA	NA	F	T
ACCTGCGATCGCGACAGAACACGTCGCAAGC	3	CACCTGCGATCGCGACAGAACACGTCGCAAGCACTATCCAG	41	0.0460804277647942	60.559565	4.299	-3.816282	F	NA	NA	NA	NA	NA	NA	NA	NA	NA	NA	NA	NA	NA	NA	NA	NA	NA	NA	F	NA	NA	NA	NA	NA	NA	NA	NA	NA	NA	NA	NA	NA	NA	NA	NA	NA	NA	NA
CCGCCACCGCCGAACACGCCGACATAGAAGC	5	AGCCGCCACCGCCGAACACGCCGACATAGAAGCCC	35	0.0480871302537724	50.495652	1.090333	-5.533318	F	NA	NA	NA	NA	NA	NA	NA	NA	NA	NA	NA	NA	NA	NA	NA	NA	NA	NA	F	NA	NA	NA	NA	NA	NA	NA	NA	NA	NA	NA	NA	NA	NA	NA	NA	NA	NA	NA
AGTGACAATAAATAACAATACCGGGCTCTCA	2	TAGTGACAATAAATAACAATACCGGGCTCTCA	32	0.0375454332166112	1.470435	10.951667	2.896836	T	6143	chr3	5932750	5932767	NA	9S18M5S	0	0	0	0	5	9	T	T	0.5625	1	1	0	F	NA	NA	NA	NA	NA	NA	NA	NA	NA	ENSG00000230944	-	AC026202.1	675990	ENSG00000229642	+	AC087857.1	30074	NA	NA
AAGCCTCCGGGCGCACATTGGTATGCGCCGT	25	GCCATAGCGCCACGGCGCATACCAATGTGCGCCCGGAGGCTTTGCCGCGGGCACG	55	0.019458302438365	7.091304	1	-2.826051	F	NA	NA	NA	NA	NA	NA	NA	NA	NA	NA	NA	NA	NA	NA	NA	NA	NA	NA	F	NA	NA	NA	NA	NA	NA	NA	NA	NA	NA	NA	NA	NA	NA	NA	NA	NA	NA	NA
ACATGGACACCGACTCTGACGACCTCACTCA	4	GACATGGACACCGACTCTGACGACCTCACTCACG	34	0.0377055072803944	57.663913	1	-5.849597	F	NA	NA	NA	NA	NA	NA	NA	NA	NA	NA	NA	NA	NA	NA	NA	NA	NA	NA	F	NA	NA	NA	NA	NA	NA	NA	NA	NA	NA	NA	NA	NA	NA	NA	NA	NA	NA	NA
CATCGAATGGAGTCATCATCATATGGAATCG	1	CATCGAATGGAGTCATCATCATATGGAATCG	31	0.041587655719964	2683.304348	149.333333	-4.167403	T	9640	chr1	125154556	125154586	NA	31M	0	0	0	1	0	0	F	F	1	0.967741935483871	4	1	F	NA	NA	NA	NA	NA	NA	NA	NA	NA	ENSG00000224857	-	LINC01691	3574033	ENSG00000276118	+	AC242852.1	18188593	NA	NA
CCGAATTGAGCGGGATCACCTTGGGCTCGAC	23	CGTGGTCGTCGAGCCCAAGGTGATCCCGCTCAATTCGGAACCCTATATCCCGG	53	0.0127341652434803	69.592174	2.211	-4.976154	F	NA	NA	NA	NA	NA	NA	NA	NA	NA	NA	NA	NA	NA	NA	NA	NA	NA	NA	F	NA	NA	NA	NA	NA	NA	NA	NA	NA	NA	NA	NA	NA	NA	NA	NA	NA	NA	NA
CCGCGGGCGATTCCGATGCGCTGGCGCTGGC	3	GGCCAGCGCCAGCGCATCGGAATCGCCCGCGGC	33	0.0330204931547224	122.06913	1	-6.931555	T	11224	chr12	2753021	2753039	NA	14S19M	0	0	0	2	0	14	F	T	0.575757575757576	0.894736842105263	1	2	F	NA	ENSG00000256902	IQSEC3P1	-	processed_pseudogene	NA	NA	NA	NA	NA	NA	NA	NA	NA	NA	NA	NA	T	F
GCTAATACCGAATATGCCGAGAGGTGAAATA	10	TGCTAATACCGAATATGCCGAGAGGTGAAATATTTATAGC	40	0.0327839317021438	3.316522	15.959667	2.266688	F	NA	NA	NA	NA	NA	NA	NA	NA	NA	NA	NA	NA	NA	NA	NA	NA	NA	NA	F	NA	NA	NA	NA	NA	NA	NA	NA	NA	NA	NA	NA	NA	NA	NA	NA	NA	NA	NA
CGCGCACTTCGACGCCGGCCGCGACCAGCCG	2	CCGGCTGGTCGCGGCCGGCGTCGAAGTGCGCG	32	0.0457209895818048	6.53	1	-2.707083	F	NA	NA	NA	NA	NA	NA	NA	NA	NA	NA	NA	NA	NA	NA	NA	NA	NA	NA	F	NA	NA	NA	NA	NA	NA	NA	NA	NA	NA	NA	NA	NA	NA	NA	NA	NA	NA	NA
AAGGAATGGAATCCACCCGAGTGGAATGGAA	9	AATGGAATTAAATGGAATGGAAAGGAATGGAATCCACCCGAGTGGAATGGAAT	53	0.0274359439533295	80.605217	1	-6.332801	T	1142	chr4	49109507	49109559	NA	53M	0	0	0	3	0	0	F	F	1	0.943396226415094	1	3	F	NA	NA	NA	NA	NA	NA	NA	NA	NA	ENSG00000109182	+	CWH43	47427	ENSG00000249828	-	AC118282.3	93611	NA	NA
ACCGACCGCCAGAACGAAATCTCCGGGCTTG	14	TGAGGCCAAGCCCGGAGATTTCGTTCTGGCGGTCGGTGCTCCTCGGG	47	0.0228646485486425	53.123043	3.727333	-3.833122	F	NA	NA	NA	NA	NA	NA	NA	NA	NA	NA	NA	NA	NA	NA	NA	NA	NA	NA	F	NA	NA	NA	NA	NA	NA	NA	NA	NA	NA	NA	NA	NA	NA	NA	NA	NA	NA	NA
CATACCGCAGTACTCCCACATGATGTGGCCA	12	AACTTGGCCACATCATGTGGGAGTACTGCGGTATGGAGCGCA	42	0.0324952930339487	71.965652	1	-6.169237	F	NA	NA	NA	NA	NA	NA	NA	NA	NA	NA	NA	NA	NA	NA	NA	NA	NA	NA	F	NA	NA	NA	NA	NA	NA	NA	NA	NA	NA	NA	NA	NA	NA	NA	NA	NA	NA	NA
CGGCGATGATCAGGGTTTTGTCGACGCCACG	24	ACCAGTTGATCGGCGATGATCAGGGTTTTGTCGACGCCACGCTGGTCACCACGC	54	0.0143062253752827	37.794348	1	-5.240099	F	NA	NA	NA	NA	NA	NA	NA	NA	NA	NA	NA	NA	NA	NA	NA	NA	NA	NA	F	NA	NA	NA	NA	NA	NA	NA	NA	NA	NA	NA	NA	NA	NA	NA	NA	NA	NA	NA
GATCTACGACGTGCTGCGCAAACACCATGCC	33	ACCGATTTGATCTACGACGTGCTGCGCAAACACCATGCCGACCACGTGCTGTTGCGCGCTGCGCGCAGCG	70	0	24.286087	1	-4.602058	F	NA	NA	NA	NA	NA	NA	NA	NA	NA	NA	NA	NA	NA	NA	NA	NA	NA	NA	F	NA	NA	NA	NA	NA	NA	NA	NA	NA	NA	NA	NA	NA	NA	NA	NA	NA	NA	NA
AGTGGGCCGTAGCTGGAATTGTCTCGATCAC	14	TGACTTTAGTGGGCCGTAGCTGGAATTGTCTCGATCACGCACAT	44	0.00542301441085052	1	10.782667	3.430642	F	NA	NA	NA	NA	NA	NA	NA	NA	NA	NA	NA	NA	NA	NA	NA	NA	NA	NA	F	NA	NA	NA	NA	NA	NA	NA	NA	NA	NA	NA	NA	NA	NA	NA	NA	NA	NA	NA
AGGCGGTCCGTCGCCTGATCCAGGCCGAAGG	33	GGCGGAGGCGGTCCGTCGCCTGATCCAGGCCGAAGGTTTTGGCGCGCGCATCGAAACGCTGAACG	65	0.0215274108825921	1	10.825	3.436295	F	NA	NA	NA	NA	NA	NA	NA	NA	NA	NA	NA	NA	NA	NA	NA	NA	NA	NA	F	NA	NA	NA	NA	NA	NA	NA	NA	NA	NA	NA	NA	NA	NA	NA	NA	NA	NA	NA
AGACAGGGCGAAGTTCCACGGCGGGGTGACG	16	GCCACGAGTGACCGTCGTCACCCCGCCGTGGAACTTCGCCCTGTCTAT	48	0.0237999733705797	119.014783	1.083	-6.779964	F	NA	NA	NA	NA	NA	NA	NA	NA	NA	NA	NA	NA	NA	NA	NA	NA	NA	NA	F	NA	NA	NA	NA	NA	NA	NA	NA	NA	NA	NA	NA	NA	NA	NA	NA	NA	NA	NA
CCTCGACATCGACATGGGCCTGCGCCAGCGA	24	TCGCCTCGACATCGACATGGGCCTGCGCCAGCGAAAAGGCGATCGACTGGTTGG	54	0.0310416303608351	1	15.502	3.954382	F	NA	NA	NA	NA	NA	NA	NA	NA	NA	NA	NA	NA	NA	NA	NA	NA	NA	NA	F	NA	NA	NA	NA	NA	NA	NA	NA	NA	NA	NA	NA	NA	NA	NA	NA	NA	NA	NA
CGGCGGGCGAGACGGGCCGGTGGTGCGCCAG	8	TTCCGATCTGGCGCACCACCGGCCCGTCTCGCCCGCCG	38	0.0176001688942655	1.096087	9.891667	3.173851	T	14727	chr21	8215343	8215364	NA	16S22M	0	0	0	0	0	16	F	T	0.578947368421053	1	8	0	F	NA	ENSG00000278996	FP671120.2	+	lncRNA	NA	NA	NA	NA	NA	NA	NA	NA	NA	NA	NA	NA	F	T
TGGCGATAGTGCTTGTGGTGATGGCGGCCCA	14	GCCAACGCCAAGATGGGCCGCCATCACCACAAGCACTATCGCCA	44	0.0133645709604304	1	6.483	2.696662	F	NA	NA	NA	NA	NA	NA	NA	NA	NA	NA	NA	NA	NA	NA	NA	NA	NA	NA	F	NA	NA	NA	NA	NA	NA	NA	NA	NA	NA	NA	NA	NA	NA	NA	NA	NA	NA	NA
GGCGTCGTCGCCCGTGACTAAAAAGGCCCAA	28	GAGAGGCGTCGTCGCCCGTGACTAAAAAGGCCCAAGATCCCGGTATGATCCCGGACACCGAACAGACCCTC	71	0.029166975915784	6.958261	1	-2.798727	F	NA	NA	NA	NA	NA	NA	NA	NA	NA	NA	NA	NA	NA	NA	NA	NA	NA	NA	F	NA	NA	NA	NA	NA	NA	NA	NA	NA	NA	NA	NA	NA	NA	NA	NA	NA	NA	NA
CGCTCGCCACGACGTCTATGGCGGCGAGTCC	5	CCCGCTCGCCACGACGTCTATGGCGGCGAGTCCGA	35	0.0301029908788949	14.293478	2.951	-2.276081	T	14233	chr15	25866385	25866403	NA	16S19M	0	0	0	1	0	16	F	T	0.542857142857143	0.947368421052632	1	1	F	NA	ENSG00000259011	AC016266.1	+	lncRNA	NA	NA	NA	NA	NA	NA	NA	NA	NA	NA	NA	NA	F	T
GCGACGAGCTGGTGATGCCTGGATCGCAGCC	4	GGCGACGAGCTGGTGATGCCTGGATCGCAGCCCG	34	0.045956079435249	16.343913	1.666333	-3.294005	T	17949	chr1	218644973	218644989	NA	9S17M8S	0	0	0	0	8	9	T	T	0.5	1	1	0	F	NA	NA	NA	NA	NA	NA	NA	NA	NA	ENSG00000212610	-	RF00012	103075	ENSG00000226693	-	NXNP1	236610	NA	NA
CAGCGGCGCCGGACAGGAATTGCGTCGGCAG	41	CAGCGGCGCCGGACAGGAATTGCGTCGGCAGCGTCCAGAACACGCCGAGATAGGACCACAGGAAGAACGCG	71	0.0333837674461622	7.622174	1	-2.930203	F	NA	NA	NA	NA	NA	NA	NA	NA	NA	NA	NA	NA	NA	NA	NA	NA	NA	NA	F	NA	NA	NA	NA	NA	NA	NA	NA	NA	NA	NA	NA	NA	NA	NA	NA	NA	NA	NA
ACAATAGCGGCTTTTCTCGACGCATGGCTCA	27	GTTTACGGTACGGGTACGATATAAACAATAGCGGCTTTTCTCGACGCATGGCTCACA	57	0.0350946932248382	1	8.564333	3.098341	F	NA	NA	NA	NA	NA	NA	NA	NA	NA	NA	NA	NA	NA	NA	NA	NA	NA	NA	F	NA	NA	NA	NA	NA	NA	NA	NA	NA	NA	NA	NA	NA	NA	NA	NA	NA	NA	NA
CGGTCACCTCCAGGAACGGAGCATTGCAGCA	10	CGGCCAGACTGCTGCAATGCTCCGTTCCTGGAGGTGACCG	40	0.0444665677147787	1	6.124	2.614474	F	NA	NA	NA	NA	NA	NA	NA	NA	NA	NA	NA	NA	NA	NA	NA	NA	NA	NA	F	NA	NA	NA	NA	NA	NA	NA	NA	NA	NA	NA	NA	NA	NA	NA	NA	NA	NA	NA
GCCTCGGGCAGGGCGCAGTAACCGATCCGCA	15	GCCTCGGGCAGGGCGCAGTAACCGATCCGCAATCCCGGAAACAGC	45	0.0308559034509533	9.894783	1.027667	-3.267295	F	NA	NA	NA	NA	NA	NA	NA	NA	NA	NA	NA	NA	NA	NA	NA	NA	NA	NA	F	NA	NA	NA	NA	NA	NA	NA	NA	NA	NA	NA	NA	NA	NA	NA	NA	NA	NA	NA
ACAGTCCCAGCCTGCCTTGCGGTCGACGCGG	3	TGACAGTCCCAGCCTGCCTTGCGGTCGACGCGG	33	0.0460074628185772	41.652174	1	-5.38032	F	NA	NA	NA	NA	NA	NA	NA	NA	NA	NA	NA	NA	NA	NA	NA	NA	NA	NA	F	NA	NA	NA	NA	NA	NA	NA	NA	NA	NA	NA	NA	NA	NA	NA	NA	NA	NA	NA
AGATGTAGGCGCCTGCGCCGGCATGGACGAC	46	CAGCAGAGCCGTCTCCTCGCCACAGATGTAGGCGCCTGCGCCGGCATGGACGACAACGTCAAGGTCGTACCCGGAAC	77	0.0262985487957425	66.415217	3.101333	-4.420553	F	NA	NA	NA	NA	NA	NA	NA	NA	NA	NA	NA	NA	NA	NA	NA	NA	NA	NA	F	NA	NA	NA	NA	NA	NA	NA	NA	NA	NA	NA	NA	NA	NA	NA	NA	NA	NA	NA
AAAGCGTGAAGCCAGGAAGAAGATGTTCGTC	1	AAAGCGTGAAGCCAGGAAGAAGATGTTCGTC	31	0.0424238637435241	1	7.403	2.88811	T	328	chr15	89981591	89981613	NA	23M8S	0	0	0	2	8	0	T	F	0.741935483870968	0.91304347826087	1	2	F	NA	NA	NA	NA	NA	NA	NA	NA	NA	ENSG00000280377	+	AC027176.3	30247	ENSG00000140548	+	ZNF710	19710	NA	NA
ATGGAATGGAATGCAATGCAATGGGATCAAC	1	ATGGAATGGAATGCAATGCAATGGGATCAAC	31	0.0425553643907794	36.724348	1.091	-5.073014	T	7919	chr20	31066964	31066994	NA	31M	0	0	0	1	0	0	F	F	1	0.967741935483871	2	1	F	NA	NA	NA	NA	NA	NA	NA	NA	NA	ENSG00000275305	-	RNA5SP528	250691	ENSG00000215547	+	DEFB115	190669	NA	NA
CGGGGCGCCGCTGTTCATCATCTCGGTACCC	5	ATCGGGGCGCCGCTGTTCATCATCTCGGTACCCGA	35	0.0462620474731228	55.713913	4.125	-3.755572	F	NA	NA	NA	NA	NA	NA	NA	NA	NA	NA	NA	NA	NA	NA	NA	NA	NA	NA	F	NA	NA	NA	NA	NA	NA	NA	NA	NA	NA	NA	NA	NA	NA	NA	NA	NA	NA	NA
AGTATATAATACATGTTTGGGTACTTTGATA	11	ACAAAAAATATCAAAGTACCCAAACATGTATTATATACTGT	41	0.0356328991199734	67.47087	1.027667	-6.03682	T	6027	chr3	93470662	93470685	NA	17S24M	0	0	0	0	0	17	F	T	0.585365853658537	1	2	0	F	NA	NA	NA	NA	NA	NA	NA	NA	NA	ENSG00000283544	-	ABBA01000935.2	1956888	ENSG00000251727	+	RNU6-488P	373078	NA	NA
AACTAAGTTTATATGGTATATTTAGATTAAT	19	ATTAATCTAAATATACCATATAAACTTAGTTTTAACACAATACCTGCTA	49	0.0395565009846821	32.304348	1	-5.013656	F	NA	NA	NA	NA	NA	NA	NA	NA	NA	NA	NA	NA	NA	NA	NA	NA	NA	NA	F	NA	NA	NA	NA	NA	NA	NA	NA	NA	NA	NA	NA	NA	NA	NA	NA	NA	NA	NA
AGCATCGCGGGCTTGTAGGACGAAGAGGCAG	45	CAAGGGCCAGACTGCCTCTTCGTCCTACAAGCCCGCGATGCTGTCGAACGGCATCCGGACCGGCGTGCCGCCGCA	75	0.00714407529912257	25.313478	2.485667	-3.348201	F	NA	NA	NA	NA	NA	NA	NA	NA	NA	NA	NA	NA	NA	NA	NA	NA	NA	NA	F	NA	NA	NA	NA	NA	NA	NA	NA	NA	NA	NA	NA	NA	NA	NA	NA	NA	NA	NA
GCTGAGCCAGGACTTGACGCGCTACGTCGAC	34	GAAGCCGAGAGAGCGGTGGAGGTCGACGTAGCGCGTCAAGTCCTGGCTCAGCATGACACATCCCCC	66	0.00628985007746395	100.296087	3.566667	-4.813545	F	NA	NA	NA	NA	NA	NA	NA	NA	NA	NA	NA	NA	NA	NA	NA	NA	NA	NA	F	NA	NA	NA	NA	NA	NA	NA	NA	NA	NA	NA	NA	NA	NA	NA	NA	NA	NA	NA
AGTCTGAGAGCTTACCTGTGTCACTGTCGGC	24	TCTGTGTGCCAACTCTGGCTAGCCGACAGTGACACAGGTAAGCTCTCAGACTGC	54	0.0448284288378651	20.307826	1	-4.343964	T	6105	chr22	17726817	17726870	NA	54M	0	0	0	1	0	0	F	F	1	0.981481481481482	1	1	F	NA	ENSG00000099968	BCL2L13	+	protein_coding	NA	NA	NA	NA	NA	NA	NA	NA	NA	NA	NA	NA	T	F
AGCGATGATTTGAGAAATGAGCAGCCAGCCC	16	CGCAGCGATGATTTGAGAAATGAGCAGCCAGCCCCTCCCCCGAAAG	46	0.0386966499595079	4.858696	1.048667	-2.212013	F	NA	NA	NA	NA	NA	NA	NA	NA	NA	NA	NA	NA	NA	NA	NA	NA	NA	NA	F	NA	NA	NA	NA	NA	NA	NA	NA	NA	NA	NA	NA	NA	NA	NA	NA	NA	NA	NA
AGGGCGCCGCCGAGCGTGCCGAACAGCGTCG	1	AGGGCGCCGCCGAGCGTGCCGAACAGCGTCG	31	0.0475694177839068	37.308261	4.777667	-2.965117	T	5789	chr1	37034112	37034131	NA	20M11S	0	0	0	1	11	0	T	F	0.645161290322581	0.95	1	1	F	NA	ENSG00000163873	GRIK3	-	protein_coding	NA	NA	NA	NA	NA	NA	NA	NA	NA	NA	NA	NA	T	F
GCGGCTTCGCTGACGCCGCTTCCGCTCAGCA	21	ACGCGGCTTCGCTGACGCCGCTTCCGCTCAGCATCTCGACCGGCGCGCCGC	51	0.0480555807714121	1	6.173333	2.62605	F	NA	NA	NA	NA	NA	NA	NA	NA	NA	NA	NA	NA	NA	NA	NA	NA	NA	NA	F	NA	NA	NA	NA	NA	NA	NA	NA	NA	NA	NA	NA	NA	NA	NA	NA	NA	NA	NA
ACCTCGGCGACGATCTTGGCGCTCACCGCCT	11	GCGGAGATCGAGGCGGTGAGCGCCAAGATCGTCGCCGAGGT	41	0.0230158764435941	13.31087	1.210333	-3.459129	F	NA	NA	NA	NA	NA	NA	NA	NA	NA	NA	NA	NA	NA	NA	NA	NA	NA	NA	F	NA	NA	NA	NA	NA	NA	NA	NA	NA	NA	NA	NA	NA	NA	NA	NA	NA	NA	NA
AACGTCGGCACAAGCGGCTCGCTCGCGGTGT	11	ACAACGTCGGCACAAGCGGCTCGCTCGCGGTGTATGGGCCG	41	0.034353307875895	1.062609	10.531667	3.309051	F	NA	NA	NA	NA	NA	NA	NA	NA	NA	NA	NA	NA	NA	NA	NA	NA	NA	NA	F	NA	NA	NA	NA	NA	NA	NA	NA	NA	NA	NA	NA	NA	NA	NA	NA	NA	NA	NA
ACTACCGAATTTCACGATCACGGCCAACCCG	3	CGACTACCGAATTTCACGATCACGGCCAACCCG	33	0.0415473299033807	6.922609	1.014	-2.771258	T	3517	chr1	18709448	18709466	NA	14S19M	0	0	0	1	0	14	F	T	0.575757575757576	0.947368421052632	1	1	F	NA	ENSG00000009709	PAX7	+	protein_coding	NA	NA	NA	NA	NA	NA	NA	NA	NA	NA	NA	NA	F	T
CGCTGCACCGGTCGCACCGACGACATGCTGA	16	AGATCCGCTGCACCGGTCGCACCGACGACATGCTGATCGTGCGCGGGGCCAACGTATTCC	60	0.0207579169527392	1.104348	10.208333	3.208481	F	NA	NA	NA	NA	NA	NA	NA	NA	NA	NA	NA	NA	NA	NA	NA	NA	NA	NA	F	NA	NA	NA	NA	NA	NA	NA	NA	NA	NA	NA	NA	NA	NA	NA	NA	NA	NA	NA
AACCACGGATCGAACGTCTGCAGGCTCAATT	16	CGAACCACGGATCGAACGTCTGCAGGCTCAATTTCAGGAGCGCCAGG	47	0.0224254682996495	1.099565	12.105333	3.460638	F	NA	NA	NA	NA	NA	NA	NA	NA	NA	NA	NA	NA	NA	NA	NA	NA	NA	NA	F	NA	NA	NA	NA	NA	NA	NA	NA	NA	NA	NA	NA	NA	NA	NA	NA	NA	NA	NA
TCGATGACGCTGATGGAGGAGATAGCGGCGA	28	GCAACGTCTTCGCCGCTATCTCCTCCATCAGCGTCATCGACTGGCCGGAGCTGTAGCC	58	0.049084138426517	14.171304	1	-3.824901	F	NA	NA	NA	NA	NA	NA	NA	NA	NA	NA	NA	NA	NA	NA	NA	NA	NA	NA	F	NA	NA	NA	NA	NA	NA	NA	NA	NA	NA	NA	NA	NA	NA	NA	NA	NA	NA	NA
CATGATCATCATTGATCCGACCGTCGAAGAG	3	CTCTTCGACGGTCGGATCAATGATGATCATGAC	33	0.0467089325970169	128.997826	1.895333	-6.088752	T	9744	chr13	102584037	102584054	NA	15S18M	0	0	0	1	0	15	F	T	0.545454545454545	0.944444444444444	3	1	F	NA	NA	NA	NA	NA	NA	NA	NA	NA	ENSG00000102466	-	FGF14	181581	ENSG00000261057	-	LINC00555	5317	NA	NA
AAAATGGCCAACGATCGCTGCGCCCAACGGT	27	GGTCGCCAAAATGGCCAACGATCGCTGCGCCCAACGGTCGCACGAGGAGGCCAACGG	57	0.0299405271191398	1	8.992333	3.168695	F	NA	NA	NA	NA	NA	NA	NA	NA	NA	NA	NA	NA	NA	NA	NA	NA	NA	NA	F	NA	NA	NA	NA	NA	NA	NA	NA	NA	NA	NA	NA	NA	NA	NA	NA	NA	NA	NA
CGGCATTGGTGGCCGGACGGTAGGTGCCGAC	18	GCCGGCATTGGTGGCCGGACGGTAGGTGCCGACCACCGTGCGGGCCTT	48	0.0442756376542536	15.193043	1	-3.925339	F	NA	NA	NA	NA	NA	NA	NA	NA	NA	NA	NA	NA	NA	NA	NA	NA	NA	NA	F	NA	NA	NA	NA	NA	NA	NA	NA	NA	NA	NA	NA	NA	NA	NA	NA	NA	NA	NA
GAATAGCGATGACATCCCGGTAACCGTGCAC	5	CCCGAATAGCGATGACATCCCGGTAACCGTGCACC	35	0.0203230569095256	39.75913	1	-5.313214	F	NA	NA	NA	NA	NA	NA	NA	NA	NA	NA	NA	NA	NA	NA	NA	NA	NA	NA	F	NA	NA	NA	NA	NA	NA	NA	NA	NA	NA	NA	NA	NA	NA	NA	NA	NA	NA	NA
CCGCGGTCGCATCGACGTTTCACGCGGCGGA	19	CTGGTTCATGCTGGCCGCGGTCGCATCGACGTTTCACGCGGCGGACGCATTCGT	54	0.0324739808000498	14.80913	1.708333	-3.115826	F	NA	NA	NA	NA	NA	NA	NA	NA	NA	NA	NA	NA	NA	NA	NA	NA	NA	NA	F	NA	NA	NA	NA	NA	NA	NA	NA	NA	NA	NA	NA	NA	NA	NA	NA	NA	NA	NA
ATAACGGTCGTCGTGGGCGTCCGGTGAGCGG	2	GATAACGGTCGTCGTGGGCGTCCGGTGAGCGG	32	0.0255951867208059	92.784348	1.228	-6.239499	F	NA	NA	NA	NA	NA	NA	NA	NA	NA	NA	NA	NA	NA	NA	NA	NA	NA	NA	F	NA	NA	NA	NA	NA	NA	NA	NA	NA	NA	NA	NA	NA	NA	NA	NA	NA	NA	NA
GACCATACGATCGTCGAACTGCACGAACGCA	11	TGCGTTCGTGCAGTTCGACGATCGTATGGTCGAGACCGTCG	41	0.0346474704443217	1	5.640333	2.49578	F	NA	NA	NA	NA	NA	NA	NA	NA	NA	NA	NA	NA	NA	NA	NA	NA	NA	NA	F	NA	NA	NA	NA	NA	NA	NA	NA	NA	NA	NA	NA	NA	NA	NA	NA	NA	NA	NA
TCAATCAGAAACGCAATTCCGCACAGGTCGA	5	TGTTCGACCTGTGCGGAATTGCGTTTCTGATTGAG	35	0.0483503983672428	10.535652	1	-3.397208	F	NA	NA	NA	NA	NA	NA	NA	NA	NA	NA	NA	NA	NA	NA	NA	NA	NA	NA	F	NA	NA	NA	NA	NA	NA	NA	NA	NA	NA	NA	NA	NA	NA	NA	NA	NA	NA	NA
CGCACGTCTTCCTGTTCACGATCTTCCTCGC	23	GCGACATAGGAGATCTCGGCGAGGAAGATCGTGAACAGGAAGACGTGCGCAAC	53	0.0158680231957595	58.363478	2.967333	-4.297827	F	NA	NA	NA	NA	NA	NA	NA	NA	NA	NA	NA	NA	NA	NA	NA	NA	NA	NA	F	NA	NA	NA	NA	NA	NA	NA	NA	NA	NA	NA	NA	NA	NA	NA	NA	NA	NA	NA
CCCGAATGGAATGGAATGGACTCAAATGTAA	6	ATGGAATGGAATTTACCCGAATGGAATGGAATGGACTCAAATGTAA	46	0.0279047458128578	263.815217	1.385333	-7.573151	T	10666	chr10	38785081	38785110	NA	16S30M	0	0	0	2	0	16	F	T	0.652173913043478	0.933333333333333	1	2	F	NA	NA	NA	NA	NA	NA	NA	NA	NA	ENSG00000233832	+	AL590623.1	1974	ENSG00000229485	-	KSR1P1	3364199	NA	NA
ACCGGCAGCGTCATGTAGCGGTTTGAGCACC	23	CGACGACAAGGCGAGTCAGACCGGCAGCGTCATGTAGCGGTTTGAGCACCGGCAT	55	0.0352131910856529	58.638261	2.221	-4.722561	F	NA	NA	NA	NA	NA	NA	NA	NA	NA	NA	NA	NA	NA	NA	NA	NA	NA	NA	F	NA	NA	NA	NA	NA	NA	NA	NA	NA	NA	NA	NA	NA	NA	NA	NA	NA	NA	NA
CATCAGCTGTCGTTTCTGGATCCAGCGCCGA	2	ACATCAGCTGTCGTTTCTGGATCCAGCGCCGA	32	0.032558309394998	46.574783	1	-5.541477	T	9612	chr19	48141084	48141101	NA	14S18M	0	0	0	1	0	14	F	T	0.5625	0.944444444444444	1	1	F	NA	ENSG00000105486	LIG1	-	protein_coding	NA	NA	NA	NA	NA	NA	NA	NA	NA	NA	NA	NA	F	T
AGGATGTTGAGCAGCCGCTTGCGGCCGATGC	6	GCAGGATGTTGAGCAGCCGCTTGCGGCCGATGCCGA	36	0.0398817638838437	1	5.707	2.512733	T	5532	chr19	16566609	16566627	NA	19M17S	0	0	0	1	17	0	T	F	0.527777777777778	0.947368421052632	1	1	F	NA	ENSG00000141979	AC008764.1	-	protein_coding	NA	NA	NA	NA	NA	NA	NA	NA	NA	NA	NA	NA	T	F
CGATCACATCGCGACCTTCGAGAAGACCGCG	41	TCGAGGTCACCAAGGGCGCCGATCACATCGCGACCTTCGAGAAGACCGCGATGAGCCAGCGCAAATATTGC	71	0.00573658027233477	1	13.619667	3.76762	F	NA	NA	NA	NA	NA	NA	NA	NA	NA	NA	NA	NA	NA	NA	NA	NA	NA	NA	F	NA	NA	NA	NA	NA	NA	NA	NA	NA	NA	NA	NA	NA	NA	NA	NA	NA	NA	NA
CCCGCCGGATTTCTCCTTACGTTGCCGATTC	18	TCGGCTCCGAAAGAGAATCGGCAACGTAAGGAGAAATCCGGCGGGCCA	48	0.042148191432868	1	5.216	2.382944	F	NA	NA	NA	NA	NA	NA	NA	NA	NA	NA	NA	NA	NA	NA	NA	NA	NA	NA	F	NA	NA	NA	NA	NA	NA	NA	NA	NA	NA	NA	NA	NA	NA	NA	NA	NA	NA	NA
ACGTCAGTCGGAGTCTGGCAGCGGGAACGCG	3	GGACGTCAGTCGGAGTCTGGCAGCGGGAACGCG	33	0.0196217975328506	30.327391	1	-4.922549	T	3393	chr20	25077739	25077756	NA	10S18M5S	0	0	0	0	5	10	T	T	0.545454545454545	1	1	0	F	NA	ENSG00000100987	VSX1	-	protein_coding	NA	NA	NA	NA	NA	NA	NA	NA	NA	NA	NA	NA	T	F
GCATGGGCGTTGCGTCGTTCTGTATGGCGGA	10	CGGGAAATATCCGCCATACAGAACGACGCAACGCCCATGC	40	0.0377952168140071	1	9.114333	3.188137	F	NA	NA	NA	NA	NA	NA	NA	NA	NA	NA	NA	NA	NA	NA	NA	NA	NA	NA	F	NA	NA	NA	NA	NA	NA	NA	NA	NA	NA	NA	NA	NA	NA	NA	NA	NA	NA	NA
ATGCTGATGCGGACCGCTGCCGAATACGAGA	71	ACCGTGACCGGCAGCTCGATCTCGTATTCGGCAGCGGTCCGCATCAGCATGGTGGTGTAGCGATAGCCGTCGCGACCGAAGCGCTCGCCGGCATATTCGAG	101	0	17.905217	1.094667	-4.031816	F	NA	NA	NA	NA	NA	NA	NA	NA	NA	NA	NA	NA	NA	NA	NA	NA	NA	NA	F	NA	NA	NA	NA	NA	NA	NA	NA	NA	NA	NA	NA	NA	NA	NA	NA	NA	NA	NA
CGACACGATCGCGCGAGCGCCGAGCCCGGCC	58	GGCACGGAACGGCTCGATGCAGGACGAATCCCGACACGATCGCGCGAGCGCCGAGCCCGGCCGCCGCACGTTCCTGAAGACCAGTCTT	88	0.0457811379066844	9.671739	1	-3.273775	F	NA	NA	NA	NA	NA	NA	NA	NA	NA	NA	NA	NA	NA	NA	NA	NA	NA	NA	F	NA	NA	NA	NA	NA	NA	NA	NA	NA	NA	NA	NA	NA	NA	NA	NA	NA	NA	NA
GCGGTCAGCGCGCTTGCCGCGGTCACGACCC	19	AAACGCGGTCAGCGCGCTTGCCGCGGTCACGACCCAGTTGCAGCAGACCTCG	52	0.0231451312046046	9.94087	2.228333	-2.157407	F	NA	NA	NA	NA	NA	NA	NA	NA	NA	NA	NA	NA	NA	NA	NA	NA	NA	NA	F	NA	NA	NA	NA	NA	NA	NA	NA	NA	NA	NA	NA	NA	NA	NA	NA	NA	NA	NA
AAATTAGCATCATGCTAGCAAGTTAAGCGAA	27	GTCAGTGTTCGCTTAACTTGCTAGCATGATGCTAATTTCGTGGCATGGGGAAAATCC	57	0.0328909478515874	47.285217	1	-5.563317	F	NA	NA	NA	NA	NA	NA	NA	NA	NA	NA	NA	NA	NA	NA	NA	NA	NA	NA	F	NA	NA	NA	NA	NA	NA	NA	NA	NA	NA	NA	NA	NA	NA	NA	NA	NA	NA	NA
ATCTGGAATTTGCCGCAACGGTCGATACGCC	29	GCAACTTGGGTATATTCCAGGCGTATCGACCGTTGCGGCAAATTCCAGATCCATCCGGC	59	0.00507802902933172	37.355217	2.041333	-4.193726	F	NA	NA	NA	NA	NA	NA	NA	NA	NA	NA	NA	NA	NA	NA	NA	NA	NA	NA	F	NA	NA	NA	NA	NA	NA	NA	NA	NA	NA	NA	NA	NA	NA	NA	NA	NA	NA	NA
CTCGGTCTGTAGCGACATGTCACTCGCCGCC	37	CTCGGTCTGTAGCGACATGTCACTCGCCGCCAGTGCCCGCGCCGATGCGGCGAGATAGGCCGAGAAGA	68	0.0301029908788949	9.83913	1.020667	-3.269019	F	NA	NA	NA	NA	NA	NA	NA	NA	NA	NA	NA	NA	NA	NA	NA	NA	NA	NA	F	NA	NA	NA	NA	NA	NA	NA	NA	NA	NA	NA	NA	NA	NA	NA	NA	NA	NA	NA
CTGGGTGACGAATTCGGGGCCGACGAACAGC	4	CTGGGTGACGAATTCGGGGCCGACGAACAGCACC	34	0.0415028950285207	37.519565	3.893333	-3.268565	F	NA	NA	NA	NA	NA	NA	NA	NA	NA	NA	NA	NA	NA	NA	NA	NA	NA	NA	F	NA	NA	NA	NA	NA	NA	NA	NA	NA	NA	NA	NA	NA	NA	NA	NA	NA	NA	NA
ATGATGGCCGTTTCGGCCCTTACGTTACTGA	19	GGCCGTCAGTAACGTAAGGGCCGAAACGGCCATCATTGACGACGATCGG	49	0.0102635057903666	77.041304	1	-6.26756	F	NA	NA	NA	NA	NA	NA	NA	NA	NA	NA	NA	NA	NA	NA	NA	NA	NA	NA	F	NA	NA	NA	NA	NA	NA	NA	NA	NA	NA	NA	NA	NA	NA	NA	NA	NA	NA	NA
GTCTTCTCCTCTGCTTCAATGCGCTTGACGA	1	GTCTTCTCCTCTGCTTCAATGCGCTTGACGA	31	0.0426452629286034	1.061304	3.544	1.739541	T	19631	chr16	88514790	88514811	NA	9S22M	0	0	0	1	0	9	F	T	0.709677419354839	0.954545454545455	1	1	F	NA	ENSG00000261744	AC116552.1	-	lncRNA	NA	NA	NA	NA	NA	NA	NA	NA	NA	NA	NA	NA	F	T
GTGACCCGGGGAAATAAATTCTGGTGCCGCA	12	GTGACCCGGGGAAATAAATTCTGGTGCCGCACCAAATAAATC	42	0.049084138426517	50.963478	4.496667	-3.502536	F	NA	NA	NA	NA	NA	NA	NA	NA	NA	NA	NA	NA	NA	NA	NA	NA	NA	NA	F	NA	NA	NA	NA	NA	NA	NA	NA	NA	NA	NA	NA	NA	NA	NA	NA	NA	NA	NA
CCGGTCGACAGCCTGTTCTCGCCGGTCCGCA	14	ATCCCGGTCGACAGCCTGTTCTCGCCGGTCCGCAAGGTCTCCTA	44	0.0190729663492283	50.03913	1	-5.644985	F	NA	NA	NA	NA	NA	NA	NA	NA	NA	NA	NA	NA	NA	NA	NA	NA	NA	NA	F	NA	NA	NA	NA	NA	NA	NA	NA	NA	NA	NA	NA	NA	NA	NA	NA	NA	NA	NA
GATAACCCGCTGTCACCTGTCTCATCACCCA	26	CCATTATTGGCCCGTTTCTCCGATAACCCGCTGTCACCTGTCTCATCACCCACTAT	56	0.0447959629404617	13.15	1.028	-3.677151	F	NA	NA	NA	NA	NA	NA	NA	NA	NA	NA	NA	NA	NA	NA	NA	NA	NA	NA	F	NA	NA	NA	NA	NA	NA	NA	NA	NA	NA	NA	NA	NA	NA	NA	NA	NA	NA	NA
AGCTCGACGAAGCCGCGGCTGAACGTGGCCT	27	CCTATTGCAAGGCCACGTTCAGCCGCGGCTTCGTCGAGCTCAATGCCGCCGAGCAGG	57	0.00900958210993513	1	7.179333	2.84385	F	NA	NA	NA	NA	NA	NA	NA	NA	NA	NA	NA	NA	NA	NA	NA	NA	NA	NA	F	NA	NA	NA	NA	NA	NA	NA	NA	NA	NA	NA	NA	NA	NA	NA	NA	NA	NA	NA
CAGCAGGTGAAATGGATGTGGTCGATGCTGG	1	CAGCAGGTGAAATGGATGTGGTCGATGCTGG	31	0.0456947600195313	14.367391	1.635	-3.135436	T	9154	chr14	48151294	48151309	NA	15S16M	0	0	0	0	0	15	F	T	0.516129032258065	1	1	0	F	NA	NA	NA	NA	NA	NA	NA	NA	NA	ENSG00000258639	+	AL359212.1	105079	ENSG00000286595	+	AL512358.1	42864	NA	NA
CCGAATCCCGCGCCACGAAGCTGCAACGGGC	2	ACCGAATCCCGCGCCACGAAGCTGCAACGGGC	32	0.0484503283399475	1	8.581667	3.101258	F	NA	NA	NA	NA	NA	NA	NA	NA	NA	NA	NA	NA	NA	NA	NA	NA	NA	NA	F	NA	NA	NA	NA	NA	NA	NA	NA	NA	NA	NA	NA	NA	NA	NA	NA	NA	NA	NA
GAAATAATATAATATATATTATATTATGACA	9	TGAAATAATATAATATATATTATATTATGACATTTTATG	39	0.0409828126833299	111.993478	1	-6.807271	T	16264	KN196487.1	1500	1530	NA	31M8S	0	0	0	2	8	0	T	F	0.794871794871795	0.935483870967742	1	2	F	NA	NA	NA	NA	NA	NA	NA	NA	NA	NA	NA	NA	NA	NA	NA	NA	NA	NA	NA
CCGAAGAAGATGGCGCTGGAGCTGTTCAAGC	19	CTGCGCCTGCATCAGTGCGGCCTGCCGAAGAAGATGGCGCTGGAGCTGTTCAAGCCG	57	0.0454987858480133	1	5.974333	2.578778	F	NA	NA	NA	NA	NA	NA	NA	NA	NA	NA	NA	NA	NA	NA	NA	NA	NA	NA	F	NA	NA	NA	NA	NA	NA	NA	NA	NA	NA	NA	NA	NA	NA	NA	NA	NA	NA	NA
ACGTCGACGCCTTCAGCGAACTCACCCAGCG	14	CAGTAGCCCATTCGCTGGGTGAGTTCGCTGAAGGCGTCGACGTGGCGGG	49	0.0340430796100343	47.063043	1	-5.556523	F	NA	NA	NA	NA	NA	NA	NA	NA	NA	NA	NA	NA	NA	NA	NA	NA	NA	NA	F	NA	NA	NA	NA	NA	NA	NA	NA	NA	NA	NA	NA	NA	NA	NA	NA	NA	NA	NA
AATGGAATGGACTGGAGTGGAGTGGAATGGA	1	AATGGAATGGACTGGAGTGGAGTGGAATGGA	31	0.0422552664732657	60.311739	1.164333	-5.694863	T	1665	chrY	10935535	10935570	NA	15M5D16M	0	1	0	4	0	0	F	F	1	0.838709677419355	3	5	F	NA	NA	NA	NA	NA	NA	NA	NA	NA	ENSG00000251705	+	RNA5-8SP6	735230	ENSG00000273858	-	AC140113.4	107151	NA	NA
CACGGGGAGGGCTCAGTGCCCATAAGGTAAG	50	TCAAGCCTTACCTTATGGGCACTGAGCCCTCCCCGTGGAAGCGGGCCACCAGTATTCAGAAGTGCGTGCGCACCTTAGAC	80	0.0144238616121472	86.055652	1	-6.427198	F	NA	NA	NA	NA	NA	NA	NA	NA	NA	NA	NA	NA	NA	NA	NA	NA	NA	NA	F	NA	NA	NA	NA	NA	NA	NA	NA	NA	NA	NA	NA	NA	NA	NA	NA	NA	NA	NA
ATGCTGACCAAGCAGCTGCGTGCGCTCGAGG	3	GCATGCTGACCAAGCAGCTGCGTGCGCTCGAGG	33	0.0286343700908671	9.87913	1.570333	-2.653313	T	7799	chr13	113727227	113727243	NA	16S17M	0	0	0	0	0	16	F	T	0.515151515151515	1	1	0	F	NA	ENSG00000185974	GRK1	+	protein_coding	NA	NA	NA	NA	NA	NA	NA	NA	NA	NA	NA	NA	F	T
AGGACTATTTGTCGAGCTTCGATCCGCACCT	9	TGAAGGACTATTTGTCGAGCTTCGATCCGCACCTCAAGG	39	0.00388660348319158	1	8.373333	3.065802	F	NA	NA	NA	NA	NA	NA	NA	NA	NA	NA	NA	NA	NA	NA	NA	NA	NA	NA	F	NA	NA	NA	NA	NA	NA	NA	NA	NA	NA	NA	NA	NA	NA	NA	NA	NA	NA	NA
CGGCTCGAACGACGACCATTGTCACTTGGTC	101	CCGGTGGCCAAAAACACTGCAAAGAAGAACCGGCCACGAGCCGGACAAGAAAAAGAAAATGGACCAAGTGACAATGGTCGTCGTTCGAGCCGTCGAGAGCGGCGCGACGACGACAAAGGGCATCATCGGTGCAACCGGG	139	0.00436579799818016	41.675652	2.121667	-4.295935	F	NA	NA	NA	NA	NA	NA	NA	NA	NA	NA	NA	NA	NA	NA	NA	NA	NA	NA	F	NA	NA	NA	NA	NA	NA	NA	NA	NA	NA	NA	NA	NA	NA	NA	NA	NA	NA	NA
CACCGATGTCGAATCGGGTGATGTCGGTGAA	1	CACCGATGTCGAATCGGGTGATGTCGGTGAA	31	0.0387608729236524	78.7	1.083	-6.183258	T	8869	chr5	120727507	120727522	NA	16M15S	0	0	0	0	15	0	T	F	0.516129032258065	1	1	0	F	NA	NA	NA	NA	NA	NA	NA	NA	NA	ENSG00000222609	-	RNU4-69P	16668	ENSG00000248927	+	AC114284.1	53695	NA	NA
ACCACGCTCAGGATCAGCGTGAACTGCACGT	30	ACGATCCGCGCCTCGGTCCGCGACGTGCAGTTCACGCTGATCCTGAGCGTGGTGCTGGTG	60	0.0263850756644828	25.178696	1.555	-4.017217	F	NA	NA	NA	NA	NA	NA	NA	NA	NA	NA	NA	NA	NA	NA	NA	NA	NA	NA	F	NA	NA	NA	NA	NA	NA	NA	NA	NA	NA	NA	NA	NA	NA	NA	NA	NA	NA	NA
GCGTACGGTGCTGGGGCGTTCTCTCTATGCC	24	TCGTTACCACCAATGGCATAGAGAGAACGCCCCAGCACCGTACGCGACAGCATG	54	0.0326367809724152	91.987391	1	-6.523364	F	NA	NA	NA	NA	NA	NA	NA	NA	NA	NA	NA	NA	NA	NA	NA	NA	NA	NA	F	NA	NA	NA	NA	NA	NA	NA	NA	NA	NA	NA	NA	NA	NA	NA	NA	NA	NA	NA
CGAGCCGAGACAGCAGCTGGAACGCGGCCAG	21	GAGGCGCTGGCCGCGTTCCAGCTGCTGTCTCGGCTCGAAGGCATCATACCC	51	0.0189122141760848	63.664783	2.714	-4.552003	F	NA	NA	NA	NA	NA	NA	NA	NA	NA	NA	NA	NA	NA	NA	NA	NA	NA	NA	T	chr4:5757163:-|chr7:30887104:-	NA	NA	NA	NA	NA	NA	NA	NA	NA	NA	NA	NA	NA	NA	NA	NA	NA	NA
CGACGGTACCCAAACGGGGACGGATTCGGGA	6	GTCCCGAATCCGTCCCCGTTTGGGTACCGTCGGTAA	36	0.0375068584385384	38.389565	1.254667	-4.935338	F	NA	NA	NA	NA	NA	NA	NA	NA	NA	NA	NA	NA	NA	NA	NA	NA	NA	NA	F	NA	NA	NA	NA	NA	NA	NA	NA	NA	NA	NA	NA	NA	NA	NA	NA	NA	NA	NA
AAAAAGTGAGAAAGGCCTAAAACTAGGCCTC	10	AGGAATATCAAAAAGTGAGAAAGGCCTAAAACTAGGCCTC	40	0.0329767601780464	55.911304	1	-5.805068	T	27	chr22	10771589	10771628	NA	40M	0	0	0	1	0	0	F	F	1	0.975	2	1	F	NA	NA	NA	NA	NA	NA	NA	NA	NA	ENSG00000277248	-	RF00004	35307	ENSG00000283047	-	FRG1FP	167759	NA	NA
CGGACTGATCGTCAACCACGTTGCCGTCGAC	16	CCGGGCGCTCAAGACCGGACTGATCGTCAACCACGTTGCCGTCGAC	46	0.018588606747619	1.604348	10.754	2.744814	F	NA	NA	NA	NA	NA	NA	NA	NA	NA	NA	NA	NA	NA	NA	NA	NA	NA	NA	F	NA	NA	NA	NA	NA	NA	NA	NA	NA	NA	NA	NA	NA	NA	NA	NA	NA	NA	NA
AGGGGACACGATGTCCGCGGACGCGGCCGCC	59	CTTGGCGGCCTAAGGCGTGATCCGAGGTATCGAGCGGAGCGAGAAGCCCAAGGGGACACGATGTCCGCGGACGCGGCCGCCGGCGCTTG	89	0.0226388866876057	1	8.193	3.034392	F	NA	NA	NA	NA	NA	NA	NA	NA	NA	NA	NA	NA	NA	NA	NA	NA	NA	NA	F	NA	NA	NA	NA	NA	NA	NA	NA	NA	NA	NA	NA	NA	NA	NA	NA	NA	NA	NA
ATTTGTAGATGCTGGCGTCGCTGACGCCGCA	16	CCATTTGTAGATGCTGGCGTCGCTGACGCCGCACTTACGGCACAGA	46	0.0314345464670619	1	5.052	2.336855	F	NA	NA	NA	NA	NA	NA	NA	NA	NA	NA	NA	NA	NA	NA	NA	NA	NA	NA	F	NA	NA	NA	NA	NA	NA	NA	NA	NA	NA	NA	NA	NA	NA	NA	NA	NA	NA	NA
CGCCAGCACAGCGGACGCCACCGCCCACAGC	3	CACGCCAGCACAGCGGACGCCACCGCCCACAGC	33	0.0483914665626517	52.447391	1	-5.712799	F	NA	NA	NA	NA	NA	NA	NA	NA	NA	NA	NA	NA	NA	NA	NA	NA	NA	NA	F	NA	NA	NA	NA	NA	NA	NA	NA	NA	NA	NA	NA	NA	NA	NA	NA	NA	NA	NA
AAGGAGTCTAACATCTATGCGAGTGTTTGGG	2	AAGGAGTCTAACATCTATGCGAGTGTTTGGGT	32	0.0365972743594203	1.038261	58.961667	5.827536	T	1118	chr12	98587608	98587623	NA	16S16M	0	0	0	0	0	16	F	T	0.5	1	1	0	F	NA	NA	NA	NA	NA	NA	NA	NA	NA	ENSG00000120802	+	TMPO	37230	ENSG00000225185	-	PPIAP8	3099	NA	NA
GCCGGTCATGGACGGCGTCAACCACACCAAC	4	GCCGGTCATGGACGGCGTCAACCACACCAACGAC	34	0.0335421485096986	6.736522	1	-2.752004	T	17789	chr15	28146259	28146276	NA	12S18M4S	0	0	0	0	4	12	T	T	0.529411764705882	1	1	0	F	NA	ENSG00000128731	HERC2	-	protein_coding	NA	NA	NA	NA	NA	NA	NA	NA	NA	NA	NA	NA	T	F
ACGGGCACCGCGCCCCATTCCAACAGCTTGG	1	ACGGGCACCGCGCCCCATTCCAACAGCTTGG	31	0.0303136655124233	8.575652	1	-3.100246	T	3307	chr21	23555675	23555694	NA	20M11S	0	0	0	2	11	0	T	F	0.645161290322581	0.9	1	2	F	NA	NA	NA	NA	NA	NA	NA	NA	NA	ENSG00000227716	+	AP000459.1	64952	ENSG00000288094	+	AP000961.1	148565	NA	NA
CAAAGGCTCGTCGAGCAGCAGCGTCTCGGGG	6	TGGCGTCGAGGTTGGACAAAGGCTCGTCGAGCAGCAGCGTCTCGGGGC	48	0.016667880446525	25.378696	1.354	-4.228318	F	NA	NA	NA	NA	NA	NA	NA	NA	NA	NA	NA	NA	NA	NA	NA	NA	NA	NA	F	NA	NA	NA	NA	NA	NA	NA	NA	NA	NA	NA	NA	NA	NA	NA	NA	NA	NA	NA
CCTGAGTGCCTATGGCCAGAACAATAACAAC	51	TCGTCGGCGGCGCGGCACAATTCCTGAGTGCCTATGGCCAGAACAATAACAACATTGGCAACGGAACGATCATAACCACGACCGATCCGGTA	92	0.00658238756144964	39.16087	2.717667	-3.848972	F	NA	NA	NA	NA	NA	NA	NA	NA	NA	NA	NA	NA	NA	NA	NA	NA	NA	NA	F	NA	NA	NA	NA	NA	NA	NA	NA	NA	NA	NA	NA	NA	NA	NA	NA	NA	NA	NA
TCAAAGACTCGATGGTTCACGGGATTCTGCA	27	GCGATACTTGGTGTGAATTGCAGAATCCCGTGAACCATCGAGTCTTTGAACGCAAGT	57	0.0161506294623084	125.640435	2.843667	-5.465405	F	NA	NA	NA	NA	NA	NA	NA	NA	NA	NA	NA	NA	NA	NA	NA	NA	NA	NA	F	NA	NA	NA	NA	NA	NA	NA	NA	NA	NA	NA	NA	NA	NA	NA	NA	NA	NA	NA
CCCCGTCATTACGAATGACGTGCTCTACCAA	1	CCCCGTCATTACGAATGACGTGCTCTACCAA	31	0.0463347112208505	1	5.78	2.531069	T	10595	chr12	128501584	128501599	NA	15S16M	0	0	0	1	0	15	F	T	0.516129032258065	0.9375	1	1	F	NA	ENSG00000181234	TMEM132C	+	protein_coding	NA	NA	NA	NA	NA	NA	NA	NA	NA	NA	NA	NA	F	T
CAACGTGGGTCGCAGTGAAGAGATCCAGGCG	2	CAACGTGGGTCGCAGTGAAGAGATCCAGGCGA	32	0.040643705616311	14.495652	1	-3.857548	F	NA	NA	NA	NA	NA	NA	NA	NA	NA	NA	NA	NA	NA	NA	NA	NA	NA	NA	F	NA	NA	NA	NA	NA	NA	NA	NA	NA	NA	NA	NA	NA	NA	NA	NA	NA	NA	NA
AAAACGCGGAGGCGGTAGAAGGATCTCCCCT	8	GTGTGAAAACGCGGAGGCGGTAGAAGGATCTCCCCTCG	38	0.0451384313261731	11.922174	1	-3.575575	F	NA	NA	NA	NA	NA	NA	NA	NA	NA	NA	NA	NA	NA	NA	NA	NA	NA	NA	F	NA	NA	NA	NA	NA	NA	NA	NA	NA	NA	NA	NA	NA	NA	NA	NA	NA	NA	NA
CTTGCATTTAGTATACCACACTGCGGATCAA	26	CTGATTGATCCGCAGTGTGGTATACTAAATGCAAGGCTCATCGAACCAAGAAATGA	56	0.00169152547153182	42.316522	2.121667	-4.317951	F	NA	NA	NA	NA	NA	NA	NA	NA	NA	NA	NA	NA	NA	NA	NA	NA	NA	NA	F	NA	NA	NA	NA	NA	NA	NA	NA	NA	NA	NA	NA	NA	NA	NA	NA	NA	NA	NA
ACGGCCAGTACGACGTGATCTGCACCGTCGC	5	GGCGACGGTGCAGATCACGTCGTACTGGCCGTTACGGGCGGCCGCG	46	0.0307489060882425	1	8.709667	3.122618	F	NA	NA	NA	NA	NA	NA	NA	NA	NA	NA	NA	NA	NA	NA	NA	NA	NA	NA	F	NA	NA	NA	NA	NA	NA	NA	NA	NA	NA	NA	NA	NA	NA	NA	NA	NA	NA	NA
ACAGGAAGTTTCGTTGCGATCTCGATGCAAC	21	CTGTCACGAATTGACGTTGCATCGAGATCGCAACGAAACTTCCTGTCAAATGCCG	55	0.0443956692666012	1	5.678333	2.505467	F	NA	NA	NA	NA	NA	NA	NA	NA	NA	NA	NA	NA	NA	NA	NA	NA	NA	NA	F	NA	NA	NA	NA	NA	NA	NA	NA	NA	NA	NA	NA	NA	NA	NA	NA	NA	NA	NA
GCCTCATTGCCGATGAGGGGCAGCTGCTCGA	17	GCGCGATTTCCGCCTCATTGCCGATGAGGGGCAGCTGCTCGACCTCG	47	0.047399224037091	24.520435	2.519667	-3.28268	F	NA	NA	NA	NA	NA	NA	NA	NA	NA	NA	NA	NA	NA	NA	NA	NA	NA	NA	F	NA	NA	NA	NA	NA	NA	NA	NA	NA	NA	NA	NA	NA	NA	NA	NA	NA	NA	NA
CGGAAGCCGAATAACCTTCCTTGAGCACGAC	3	CGCGGAAGCCGAATAACCTTCCTTGAGCACGACC	34	0.0462956638351311	1	5.865667	2.552295	T	14361	chr4	81455493	81455509	NA	7S17M10S	0	0	0	0	10	7	T	T	0.5	1	1	0	F	NA	ENSG00000138670	RASGEF1B	-	protein_coding	NA	NA	NA	NA	NA	NA	NA	NA	NA	NA	NA	NA	T	F
ATCCGCCAGCGCTTGTCGCTCGCGGTCGCTA	16	GATGGACGATAGCGACCGCGAGCGACAAGCGCTGGCGGATACCCAG	46	0.0328764289771447	27.235217	1	-4.767401	F	NA	NA	NA	NA	NA	NA	NA	NA	NA	NA	NA	NA	NA	NA	NA	NA	NA	NA	F	NA	NA	NA	NA	NA	NA	NA	NA	NA	NA	NA	NA	NA	NA	NA	NA	NA	NA	NA
ATGTAGGCCGCGCCGGAGATCAGCTTGATGG	3	TCCATCAAGCTGATCTCCGGCGCGGCCTACATC	33	0.0350688544368952	1.07913	6.495333	2.589535	T	8085	chr9	129776573	129776590	NA	18M15S	0	0	0	2	15	0	T	F	0.545454545454545	0.888888888888889	1	2	F	NA	NA	NA	NA	NA	NA	NA	NA	NA	ENSG00000148344	-	PTGES	23532	ENSG00000233909	+	UBE2V1P4	14605	NA	NA
GACGCCGATCGCGGTCAGCGCCTGGCGCACC	53	CGTCATGCCATGGACGCCGATCGCGGTCAGCGCCTGGCGCACCTCATCGAGCTTGAACGGTTTGATGATCGCGACGACGAGTTT	84	0.0120771398225742	39.996087	1.971667	-4.342371	F	NA	NA	NA	NA	NA	NA	NA	NA	NA	NA	NA	NA	NA	NA	NA	NA	NA	NA	F	NA	NA	NA	NA	NA	NA	NA	NA	NA	NA	NA	NA	NA	NA	NA	NA	NA	NA	NA
ACTGAACGGGCCAGCGGTCGTCGATGCCGAA	30	AACGATTCCGACTGAACGGGCCAGCGGTCGTCGATGCCGAAATCACGTCGCAGGTCGTCG	60	0.0457209895818048	10.521739	1	-3.395301	F	NA	NA	NA	NA	NA	NA	NA	NA	NA	NA	NA	NA	NA	NA	NA	NA	NA	NA	F	NA	NA	NA	NA	NA	NA	NA	NA	NA	NA	NA	NA	NA	NA	NA	NA	NA	NA	NA
GAGCTTCGACGGAGAGGGAGAGCTGCTCGAA	47	TGCGTTCGAGCAGCTCTCCCTCTCCGTCGAAGCTCTGCTCGGAAACCATCGCTCCGTGCAGGCTGAGCAAGATCCCA	77	0.0202119753726507	10.543043	1	-3.398219	F	NA	NA	NA	NA	NA	NA	NA	NA	NA	NA	NA	NA	NA	NA	NA	NA	NA	NA	F	NA	NA	NA	NA	NA	NA	NA	NA	NA	NA	NA	NA	NA	NA	NA	NA	NA	NA	NA
AGCACGACGAAGCCGCCGAGCACGAGCTTCG	35	ATGCCCTTCGGAAAGGCAACCACGATCAGCACGACGAAGCCGCCGAGCACGAGCTTCGACCAGTC	65	0.00601971269054639	27.618696	1.753333	-3.977473	F	NA	NA	NA	NA	NA	NA	NA	NA	NA	NA	NA	NA	NA	NA	NA	NA	NA	NA	F	NA	NA	NA	NA	NA	NA	NA	NA	NA	NA	NA	NA	NA	NA	NA	NA	NA	NA	NA
CATGGACTTGAACCATTCCTTGCCGTTGCGC	37	CGGTGCCCATGGACTTGAACCATTCCTTGCCGTTGCGCAGGATCGACGGCACCGTCGAGATGGACTCGACGTTG	74	0.0224254682996495	18.448261	1.028	-4.165573	F	NA	NA	NA	NA	NA	NA	NA	NA	NA	NA	NA	NA	NA	NA	NA	NA	NA	NA	F	NA	NA	NA	NA	NA	NA	NA	NA	NA	NA	NA	NA	NA	NA	NA	NA	NA	NA	NA
AAATTTTGACGAATCTCTGCACTGATCACCT	1	AAATTTTGACGAATCTCTGCACTGATCACCT	31	0.0423115536922175	45.367826	1	-5.503598	T	461	GL000225.1	97096	97126	NA	31M	0	0	0	1	0	0	F	F	1	0.967741935483871	1	1	F	NA	NA	NA	NA	NA	NA	NA	NA	NA	NA	NA	NA	NA	NA	NA	NA	NA	NA	NA
ACTAGCAGCAGCAGCAGCAGCAGCAGGAACA	7	GGACACTAGCAGCAGCAGCAGCAGCAGCAGGAACAGC	37	0.0391495001309015	38.59087	1.838	-4.392051	T	3527	chr20	45891592	45891631	NA	7M3D30M	0	1	0	2	0	0	F	F	1	0.918918918918919	1	3	F	NA	ENSG00000064601	CTSA	+	protein_coding	NA	NA	NA	NA	NA	NA	NA	NA	NA	NA	NA	NA	T	F
GTGTGTGGGTGGGTGATATTTTTTCATTGGA	4	CTCCAATGAAAAAATATCACCCACCCACACACGC	34	0.0404356632332053	131.843478	21.466333	-2.618679	T	19763	chr8	19742651	19742671	NA	21M13S	0	0	0	2	13	0	T	F	0.617647058823529	0.904761904761905	1	2	F	NA	ENSG00000147408	CSGALNACT1	-	protein_coding	NA	NA	NA	NA	NA	NA	NA	NA	NA	NA	NA	NA	F	T
ATCGAATGGAATTGATCGAAATCATTAACGA	17	GAATCTAAGGGAATCATCATCGAATGGAATTGATCGAAATCATTAACGAATGGAATCAA	59	0.032211850658326	2022.437826	143.107	-3.820929	T	7044	chr16	46390678	46390721	NA	15S44M	0	0	0	1	0	15	F	T	0.745762711864407	0.977272727272727	1	1	F	NA	NA	NA	NA	NA	NA	NA	NA	NA	ENSG00000261084	+	PPP1R1AP2	10478163	ENSG00000261239	-	ANKRD26P1	78619	NA	NA
ACCGCGCCGAGGATGGCCGAGGAGGAAGGAC	2	ACCGCGCCGAGGATGGCCGAGGAGGAAGGACT	32	0.0211122272104866	59.583478	1.872	-4.99226	T	2465	chr12	1070524	1070540	NA	17M15S	0	0	0	0	15	0	T	F	0.53125	1	1	0	F	NA	ENSG00000082805	ERC1	+	protein_coding	NA	NA	NA	NA	NA	NA	NA	NA	NA	NA	NA	NA	F	T
CACACGAGCGCATCCAGGATCTTCTCATGCC	63	ATTGTGTCCAATTCGTATGTTCACCGGCCGGCATGAGAAGATCCTGGATGCGCTCGTGTGCAGCGATCGCACGCAACACGGCGTTTCCGCCGATCACC	98	0.00268720918510221	1	13.311333	3.734583	F	NA	NA	NA	NA	NA	NA	NA	NA	NA	NA	NA	NA	NA	NA	NA	NA	NA	NA	F	NA	NA	NA	NA	NA	NA	NA	NA	NA	NA	NA	NA	NA	NA	NA	NA	NA	NA	NA
CCTGTGCGCGCGTTCGTCCTATTTCCTGCAG	10	GATCCTGTGCGCGCGTTCGTCCTATTTCCTGCAGGCGTTC	40	0.0312292652498203	19.665217	1.055667	-4.219419	F	NA	NA	NA	NA	NA	NA	NA	NA	NA	NA	NA	NA	NA	NA	NA	NA	NA	NA	F	NA	NA	NA	NA	NA	NA	NA	NA	NA	NA	NA	NA	NA	NA	NA	NA	NA	NA	NA
ATCCCACAGTGGCGTCATCGGGTTGGTCGTC	23	GGGACGACCAACCCGATGACGCCACTGTGGGATGAACGCAAGGACCTAGCGTG	53	0.0381200291504216	45.702609	1	-5.514205	F	NA	NA	NA	NA	NA	NA	NA	NA	NA	NA	NA	NA	NA	NA	NA	NA	NA	NA	T	chr20:39358433:-|chr13:76949401:+	NA	NA	NA	NA	NA	NA	NA	NA	NA	NA	NA	NA	NA	NA	NA	NA	NA	NA
CGGCGCCATGGTGTAGATGCAGCAGCGCAAG	2	CGGCGCCATGGTGTAGATGCAGCAGCGCAAGA	32	0.0299116773145065	28.448261	1.161	-4.614901	T	14658	chr9	114490139	114490155	NA	17M15S	0	0	0	1	15	0	T	F	0.53125	0.941176470588235	1	1	F	NA	ENSG00000095397	WHRN	-	protein_coding	NA	NA	NA	NA	NA	NA	NA	NA	NA	NA	NA	NA	F	T
AGACGGGGCTGGCGTCCGGCACCAGGGCCCG	3	CGAGGCGCGGGCCCTGGTGCCGGACGCCAGCCCCGTCTTCG	41	0.049970514465476	26.066522	1	-4.704126	F	NA	NA	NA	NA	NA	NA	NA	NA	NA	NA	NA	NA	NA	NA	NA	NA	NA	NA	F	NA	NA	NA	NA	NA	NA	NA	NA	NA	NA	NA	NA	NA	NA	NA	NA	NA	NA	NA
GCCTGCGTCGTCCTGACCGGCTGCGTCTACC	3	CGCCTGCGTCGTCCTGACCGGCTGCGTCTACCA	33	0.0494152044138999	1	5.394333	2.431445	T	17869	chr1	70038198	70038213	NA	9S16M8S	0	0	0	0	8	9	T	T	0.484848484848485	1	1	0	F	NA	ENSG00000033122	LRRC7	+	protein_coding	NA	NA	NA	NA	NA	NA	NA	NA	NA	NA	NA	NA	T	F
ATCGGACTCGGTCGAGACCGCGCTGCGGCTC	27	CGCGCCTTCTTCACTTCGGGCGGATCGGACTCGGTCGAGACCGCGCTGCGGCTCGCG	57	0.00833102380626	13.83913	1	-3.790681	F	NA	NA	NA	NA	NA	NA	NA	NA	NA	NA	NA	NA	NA	NA	NA	NA	NA	NA	F	NA	NA	NA	NA	NA	NA	NA	NA	NA	NA	NA	NA	NA	NA	NA	NA	NA	NA	NA
ACTGGGGCTTCAATTCGTACCTTCGCTAATG	2	TACTGGGGCTTCAATTCGTACCTTCGCTAATG	32	0.0414506649591674	1	7.729333	2.950344	T	3699	chr6	116048245	116048260	NA	16M16S	0	0	0	0	16	0	T	F	0.5	1	1	0	F	NA	ENSG00000111816	FRK	-	protein_coding	NA	NA	NA	NA	NA	NA	NA	NA	NA	NA	NA	NA	F	T
AATCAATAGATTCTAGCAATGGATTCTTGAT	69	CCGCGGCAGCGAGCGCGATCAGCAGCAGGAACAGAATGATCCGGATCATCAAGAATCCATTGCTAGAATCTATTGATTGACGGTGGCGAGCGCCGCCATGG	101	0.00628985007746395	24.866957	3.712333	-2.743832	F	NA	NA	NA	NA	NA	NA	NA	NA	NA	NA	NA	NA	NA	NA	NA	NA	NA	NA	F	NA	NA	NA	NA	NA	NA	NA	NA	NA	NA	NA	NA	NA	NA	NA	NA	NA	NA	NA
AAACCAATTATCTGAATCAACGGTTCCTCTC	13	GACAGCCGCAAAAACCAATTATCTGAATCAACGGTTCCTCTCG	43	0.0174555956975641	1	63.915333	5.99809	F	NA	NA	NA	NA	NA	NA	NA	NA	NA	NA	NA	NA	NA	NA	NA	NA	NA	NA	F	NA	NA	NA	NA	NA	NA	NA	NA	NA	NA	NA	NA	NA	NA	NA	NA	NA	NA	NA
GCGTGATGAACTGCCTCGACTGCACGGATCA	5	CCATGATCCGTGCAGTCGAGGCAGTTCATCACGCG	35	0.0415473299033807	47.846522	3.108667	-3.944046	F	NA	NA	NA	NA	NA	NA	NA	NA	NA	NA	NA	NA	NA	NA	NA	NA	NA	NA	F	NA	NA	NA	NA	NA	NA	NA	NA	NA	NA	NA	NA	NA	NA	NA	NA	NA	NA	NA
GAACCAGCGATCGTCGCCGGTCAGTCCCTTC	22	GGCCATGCACTCTTCGATGTAGAACCAGCGATCGTCGCCGGTCAGTCCCTTCTG	54	0.0259439272229378	10.758261	3.027	-1.829484	F	NA	NA	NA	NA	NA	NA	NA	NA	NA	NA	NA	NA	NA	NA	NA	NA	NA	NA	F	NA	NA	NA	NA	NA	NA	NA	NA	NA	NA	NA	NA	NA	NA	NA	NA	NA	NA	NA
TGCTGGACGTCCAGGTCGCGGTTCTCGCCAA	8	CACTGCTGGACGTCCAGGTCGCGGTTCTCGCCAACCAA	38	0.0164415263294873	16.121739	6.662667	-1.274836	F	NA	NA	NA	NA	NA	NA	NA	NA	NA	NA	NA	NA	NA	NA	NA	NA	NA	NA	F	NA	NA	NA	NA	NA	NA	NA	NA	NA	NA	NA	NA	NA	NA	NA	NA	NA	NA	NA
CAAGGGCAACGAGGTGCTCAACCACATCGCG	1	CAAGGGCAACGAGGTGCTCAACCACATCGCG	31	0.0219455813267233	15.019565	1.020667	-3.879259	T	8629	chr22	49191064	49191080	NA	14S17M	0	0	0	2	0	14	F	T	0.548387096774194	0.882352941176471	1	2	F	NA	NA	NA	NA	NA	NA	NA	NA	NA	ENSG00000285623	-	Z82202.2	3003	ENSG00000226142	-	RPL35P8	22830	NA	NA
GGCTTCAATCATTGTCTGCCATTTTTTGACC	1	GGCTTCAATCATTGTCTGCCATTTTTTGACC	31	0.0243104324069713	1	8.363	3.064021	T	19124	chr1	166022549	166022579	NA	31M	0	0	0	1	0	0	F	F	1	0.967741935483871	9	1	F	NA	ENSG00000226292	AL606495.1	+	processed_pseudogene	NA	NA	NA	NA	NA	NA	NA	NA	NA	NA	NA	NA	T	F
GGAAGCCTCGTCGTTTACGCCAGCCGGTTCA	2	CGGAAGCCTCGTCGTTTACGCCAGCCGGTTCA	32	0.028448381425748	30.537826	1.744667	-4.129574	F	NA	NA	NA	NA	NA	NA	NA	NA	NA	NA	NA	NA	NA	NA	NA	NA	NA	NA	F	NA	NA	NA	NA	NA	NA	NA	NA	NA	NA	NA	NA	NA	NA	NA	NA	NA	NA	NA
CAGGATTTCTTCAGCCCGATCCGTCGGGTCG	16	CGCCGACCCGACGGATCGGGCTGAAGAAATCCTGGTCTCAGCTTCC	46	0.0268895836886006	19.453478	1	-4.281956	F	NA	NA	NA	NA	NA	NA	NA	NA	NA	NA	NA	NA	NA	NA	NA	NA	NA	NA	F	NA	NA	NA	NA	NA	NA	NA	NA	NA	NA	NA	NA	NA	NA	NA	NA	NA	NA	NA
CAGCAGTGTTTAAACCTTCTAATTTTGCGTA	14	AACCAGCAGTGTTTAAACCTTCTAATTTTGCGTAAACATCATGT	44	0.0415691894556257	23.76087	1.593	-3.898769	F	NA	NA	NA	NA	NA	NA	NA	NA	NA	NA	NA	NA	NA	NA	NA	NA	NA	NA	F	NA	NA	NA	NA	NA	NA	NA	NA	NA	NA	NA	NA	NA	NA	NA	NA	NA	NA	NA
AGGTGGTCGGCGGCGTGGTGGCCGATCTCGG	15	CTCGGTGACGGACAAGGTGGTCGGCGGCGTGGTGGCCGATCTCGG	45	0.0424411503746878	15.52	1	-3.956057	F	NA	NA	NA	NA	NA	NA	NA	NA	NA	NA	NA	NA	NA	NA	NA	NA	NA	NA	F	NA	NA	NA	NA	NA	NA	NA	NA	NA	NA	NA	NA	NA	NA	NA	NA	NA	NA	NA
AAACCATTGTCCCGCGCATGACCGACCATCA	40	GCGCACCATCGCGCTGATGGTCGGTCATGCGCGGGACAATGGTTTCAAGGAAATCGAAGTCAGCAAGGACGCCGAG	76	0.0251790717201166	53.581739	2.168333	-4.627083	F	NA	NA	NA	NA	NA	NA	NA	NA	NA	NA	NA	NA	NA	NA	NA	NA	NA	NA	F	NA	NA	NA	NA	NA	NA	NA	NA	NA	NA	NA	NA	NA	NA	NA	NA	NA	NA	NA
CGTCGGCGATCTCGATCGGCACCGGCGGCCC	34	GGTCATGATGATTGGGCCCTCGGCGCCGAACGGGCCGCCGGTGCCGATCGAGATCGCCGACGAC	64	0.011814778886223	15.423043	1.041667	-3.888121	F	NA	NA	NA	NA	NA	NA	NA	NA	NA	NA	NA	NA	NA	NA	NA	NA	NA	NA	F	NA	NA	NA	NA	NA	NA	NA	NA	NA	NA	NA	NA	NA	NA	NA	NA	NA	NA	NA
AAGGACGCCCCGCTCAATGTCGAGGTGGTCG	11	CGCGACCACCTCGACATTGAGCGGGGCGTCCTTGCTCTCGA	41	0.0331216111735431	1.078696	9.675	3.164973	F	NA	NA	NA	NA	NA	NA	NA	NA	NA	NA	NA	NA	NA	NA	NA	NA	NA	NA	F	NA	NA	NA	NA	NA	NA	NA	NA	NA	NA	NA	NA	NA	NA	NA	NA	NA	NA	NA
TGACCGCCACCAACCCGGCCAACTTCCTGCA	15	GTGACCGCCACCAACCCGGCCAACTTCCTGCAACATGACACGTCG	45	0.0452517315800808	23.872174	1.118	-4.416338	F	NA	NA	NA	NA	NA	NA	NA	NA	NA	NA	NA	NA	NA	NA	NA	NA	NA	NA	F	NA	NA	NA	NA	NA	NA	NA	NA	NA	NA	NA	NA	NA	NA	NA	NA	NA	NA	NA
GCCCGACTGACGGATGGCCCAGCGGCCAGAC	1	GCCCGACTGACGGATGGCCCAGCGGCCAGAC	31	0.0442259452964023	22.857391	1	-4.514589	T	17623	KI270791.1	118296	118317	NA	22M9S	0	0	0	2	9	0	T	F	0.709677419354839	0.909090909090909	1	2	F	NA	NA	NA	NA	NA	NA	NA	NA	NA	NA	NA	NA	NA	NA	NA	NA	NA	NA	NA
CTGCCGTCAGGCATCGGCGGACTCGCCGGCC	4	CGGCCGGCGAGTCCGCCGATGCCTGACGGCAGCA	34	0.047399224037091	25.703913	2.118333	-3.600987	T	15864	chr4	1955757	1955773	NA	17S17M	0	0	0	1	0	17	F	T	0.5	0.941176470588235	1	1	F	NA	ENSG00000109685	NSD2	+	protein_coding	NA	NA	NA	NA	NA	NA	NA	NA	NA	NA	NA	NA	T	F
CCTGCGCGAGCTCAGGGAATCGCTGCGGAGC	17	AAGGCCTGCGCGAGCTCAGGGAATCGCTGCGGAGCCTGCCGAAGCAG	47	0.0307140731055382	8.663913	1	-3.115019	F	NA	NA	NA	NA	NA	NA	NA	NA	NA	NA	NA	NA	NA	NA	NA	NA	NA	NA	F	NA	NA	NA	NA	NA	NA	NA	NA	NA	NA	NA	NA	NA	NA	NA	NA	NA	NA	NA
CCGTTGGGAGAGAAATGCGGCACCCCATCCG	26	CGACGAAGCGCTTACCGTTGGGAGAGAAATGCGGCACCCCATCCGTAATACGGAAGAGCTCA	62	0.0157894265734266	8.809565	1.076333	-3.032946	F	NA	NA	NA	NA	NA	NA	NA	NA	NA	NA	NA	NA	NA	NA	NA	NA	NA	NA	F	NA	NA	NA	NA	NA	NA	NA	NA	NA	NA	NA	NA	NA	NA	NA	NA	NA	NA	NA
CCTGCTCGCGCTGCTGCTGTCGTTCGCCACC	7	CGCGACGGTGGCGAACGACAGCAGCAGCGCGAGCAGG	37	0.0442259452964023	19.598261	1	-4.292654	T	12122	chr3	158732328	158732347	NA	17S20M	0	0	0	1	0	17	F	T	0.540540540540541	0.95	1	1	F	NA	ENSG00000118855	MFSD1	+	protein_coding	NA	NA	NA	NA	NA	NA	NA	NA	NA	NA	NA	NA	T	F
AGTGTACATAAAATATAAAAGTACCGAAACT	8	TCTATAGTGTACATAAAATATAAAAGTACCGAAACTAT	38	0.0360094868722837	54.694348	1	-5.77332	T	6206	chr3	93470532	93470569	NA	38M	0	0	0	3	0	0	F	F	1	0.921052631578947	2	3	F	NA	NA	NA	NA	NA	NA	NA	NA	NA	ENSG00000283544	-	ABBA01000935.2	1956758	ENSG00000251727	+	RNU6-488P	373194	NA	NA
CTTTTTTGAGTAATAAAAATGAAAAGACGCC	1	CTTTTTTGAGTAATAAAAATGAAAAGACGCC	31	0.0395354427063366	9.188696	1.138667	-3.012514	T	16207	chr4	108625223	108625253	NA	31M	0	0	0	1	0	0	F	F	1	0.967741935483871	1	1	F	NA	ENSG00000109475	RPL34	+	protein_coding	NA	NA	NA	NA	NA	NA	NA	NA	NA	NA	NA	NA	T	F
CGAGCGCAACCCTTGTTCTTAGTTGCCAGCA	34	TCACCGGCAGTCTCCTTAGAGTGCCCAACTGAATGCTGGCAACTAAGAACAAGGGTTGCGCTCGTTGC	68	0.0202679513083856	41.756087	2.075	-4.330803	F	NA	NA	NA	NA	NA	NA	NA	NA	NA	NA	NA	NA	NA	NA	NA	NA	NA	NA	F	NA	NA	NA	NA	NA	NA	NA	NA	NA	NA	NA	NA	NA	NA	NA	NA	NA	NA	NA
CTTCCTCCGCGGTGAGGATCAGCCCGATCAC	70	GGCCTCCTCGACGCCACGGAAATAGAGCGCGTCGCCTTCCTCCGCGGTGAGGATCAGCCCGATCACCTTTTCGTAGAACCTTCGGCTGGCGGCAAGATCA	100	0.00542301441085052	29.934783	1.791333	-4.062717	F	NA	NA	NA	NA	NA	NA	NA	NA	NA	NA	NA	NA	NA	NA	NA	NA	NA	NA	F	NA	NA	NA	NA	NA	NA	NA	NA	NA	NA	NA	NA	NA	NA	NA	NA	NA	NA	NA
CGAGCGCTCTCATGTACGTCTTCTATGGAGC	27	CTGGCCACGGCCCAGTACTACCCGAGCGCTCTCATGTACGTCTTCTATGGAGCTTTCT	58	0.0263850756644828	50.07	1.593	-4.974128	F	NA	NA	NA	NA	NA	NA	NA	NA	NA	NA	NA	NA	NA	NA	NA	NA	NA	NA	F	NA	NA	NA	NA	NA	NA	NA	NA	NA	NA	NA	NA	NA	NA	NA	NA	NA	NA	NA
CGAAGCCCGCCGCCCAGGCCGCGGCTCCTGC	32	CCCGCCGAGGCACCGAAGCCCGCCGCCCAGGCCGCGGCTCCTGCGCCGGCTGCAGCGCCTGC	62	0.0310636220624459	27.215652	1.048667	-4.697808	F	NA	NA	NA	NA	NA	NA	NA	NA	NA	NA	NA	NA	NA	NA	NA	NA	NA	NA	F	NA	NA	NA	NA	NA	NA	NA	NA	NA	NA	NA	NA	NA	NA	NA	NA	NA	NA	NA
CGATGACAGACCCGCTCTCGGCGAAAACGCG	1	CGATGACAGACCCGCTCTCGGCGAAAACGCG	31	0.0268083539117193	10.670435	1.055667	-3.337392	T	13387	chr18	45825687	45825702	NA	9S16M6S	0	0	0	0	6	9	T	T	0.516129032258065	1	1	0	F	NA	ENSG00000197046	SIGLEC15	+	protein_coding	NA	NA	NA	NA	NA	NA	NA	NA	NA	NA	NA	NA	T	F
ATCCAGCCTGTCATCCGCGACACGTTCGACC	48	GACCAACTCGCCAATGTGACGCTGGTCGAACGTGTCGCGGATGACAGGCTGGATGCGCTGCTGTCCAGCGCTGACGTC	78	0.00388660348319158	19.695217	1.763667	-3.481195	F	NA	NA	NA	NA	NA	NA	NA	NA	NA	NA	NA	NA	NA	NA	NA	NA	NA	NA	F	NA	NA	NA	NA	NA	NA	NA	NA	NA	NA	NA	NA	NA	NA	NA	NA	NA	NA	NA
CCGGGATAGAAGTCGGTCGAGGTCGAGGGGA	6	CCCGATCCCCTCGACCTCGACCGACTTCTATCCCGG	36	0.0352131910856529	27.647826	2.39	-3.532084	F	NA	NA	NA	NA	NA	NA	NA	NA	NA	NA	NA	NA	NA	NA	NA	NA	NA	NA	F	NA	NA	NA	NA	NA	NA	NA	NA	NA	NA	NA	NA	NA	NA	NA	NA	NA	NA	NA
CTGTCTTGGTGAATCCCGGCAAGCCTTCATA	51	GCGTGGCAAGGGAGTTAGAATGCACTATCCTGTCTTGGTGAATCCCGGCAAGCCTTCATAAGCAGGCCTCAACAAGGATGCGCATGAAGAA	91	0.0160690765383585	35.116522	2.024	-4.116869	F	NA	NA	NA	NA	NA	NA	NA	NA	NA	NA	NA	NA	NA	NA	NA	NA	NA	NA	F	NA	NA	NA	NA	NA	NA	NA	NA	NA	NA	NA	NA	NA	NA	NA	NA	NA	NA	NA
AAGCGAAAGCGTGGGGAGCGAACAGGATTAG	7	CTAATCCTGTTCGCTCCCCACGCTTTCGCTTCTCAGC	37	0.0331057006446709	1	8.338667	3.059817	F	NA	NA	NA	NA	NA	NA	NA	NA	NA	NA	NA	NA	NA	NA	NA	NA	NA	NA	F	NA	NA	NA	NA	NA	NA	NA	NA	NA	NA	NA	NA	NA	NA	NA	NA	NA	NA	NA
ACACCGACCTGCAGGCCAAGCTCGCGGCGAA	3	ACACCGACCTGCAGGCCAAGCTCGCGGCGAAGC	33	0.0264600220591545	1	6.585667	2.71933	T	1947	chr17	3943428	3943443	NA	17S16M	0	0	0	0	0	17	F	T	0.484848484848485	1	1	0	F	NA	ENSG00000074370	ATP2A3	-	protein_coding	NA	NA	NA	NA	NA	NA	NA	NA	NA	NA	NA	NA	T	F
GCCGCCACGTACGCCTTTGCTTAGATCGCCC	2	CGCCGCCACGTACGCCTTTGCTTAGATCGCCC	32	0.0317372352319569	26.822609	4.482	-2.581235	T	17700	KI270789.1	147387	147402	NA	16S16M	0	0	0	0	0	16	F	T	0.5	1	1	0	F	NA	NA	NA	NA	NA	NA	NA	NA	NA	NA	NA	NA	NA	NA	NA	NA	NA	NA	NA
GTCGCGGATGCCGAGCGCGAGGGCTGACCAA	8	TATTGGTCAGCCCTCGCGCTCGGCATCCGCGACCAGAG	38	0.0306864591061424	10.858696	1	-3.440779	F	NA	NA	NA	NA	NA	NA	NA	NA	NA	NA	NA	NA	NA	NA	NA	NA	NA	NA	F	NA	NA	NA	NA	NA	NA	NA	NA	NA	NA	NA	NA	NA	NA	NA	NA	NA	NA	NA
CCCGTGAACGGTCGGTTCGGATAGGCGCGCA	1	CCCGTGAACGGTCGGTTCGGATAGGCGCGCA	31	0.0499372800660237	1.261739	9.301	2.881972	F	NA	NA	NA	NA	NA	NA	NA	NA	NA	NA	NA	NA	NA	NA	NA	NA	NA	NA	F	NA	NA	NA	NA	NA	NA	NA	NA	NA	NA	NA	NA	NA	NA	NA	NA	NA	NA	NA
GCCAATAGTTTGGGCGAGTTGCTTATCCCCC	5	ATACGCCAATAGTTTGGGCGAGTTGCTTATCCCCC	35	0.0371919287000064	30.001304	1.207333	-4.63513	F	NA	NA	NA	NA	NA	NA	NA	NA	NA	NA	NA	NA	NA	NA	NA	NA	NA	NA	F	NA	NA	NA	NA	NA	NA	NA	NA	NA	NA	NA	NA	NA	NA	NA	NA	NA	NA	NA
CGAGATCTACACCCTAGCCTACACTCTTTCC	2	CCGAGATCTACACCCTAGCCTACACTCTTTCC	32	0.00169152547153182	422.303913	3.335333	-6.984307	T	12958	chr3	187209165	187209180	NA	16S16M	0	0	0	0	0	16	F	T	0.5	1	3	0	F	NA	NA	NA	NA	NA	NA	NA	NA	NA	ENSG00000198491	-	AC007920.1	1537	ENSG00000127241	-	MASP1	8104	NA	NA
CCTTGACTTTCATCTTCTGGGGCAGTTTTGC	5	GGCAAAACTGCCCCAGAAGATGAAAGTCAAGGACA	35	0.0316379774800318	70.544348	4.599333	-3.939034	T	12262	chr8	28873860	28873877	NA	17S18M	0	0	0	2	0	17	F	T	0.514285714285714	0.888888888888889	1	2	F	NA	ENSG00000104299	INTS9	-	protein_coding	NA	NA	NA	NA	NA	NA	NA	NA	NA	NA	NA	NA	F	T
GAGCGGGCAGCAGAACAACAGCGCTGCAACA	1	GAGCGGGCAGCAGAACAACAGCGCTGCAACA	31	0.0494487325059577	55.476087	3.251333	-4.092763	T	16872	chr9	35351758	35351775	NA	4S18M9S	0	0	0	0	9	4	T	T	0.580645161290323	1	1	0	F	NA	ENSG00000198722	UNC13B	+	protein_coding	NA	NA	NA	NA	NA	NA	NA	NA	NA	NA	NA	NA	T	F
AGGTTTCGCGCCAGGCGTTCGTCGACCCGGA	8	AATGTCCGGGTCGACGAACGCCTGGCGCGAAACCTTGA	38	0.0434174441150549	1	8.211667	3.037675	F	NA	NA	NA	NA	NA	NA	NA	NA	NA	NA	NA	NA	NA	NA	NA	NA	NA	NA	F	NA	NA	NA	NA	NA	NA	NA	NA	NA	NA	NA	NA	NA	NA	NA	NA	NA	NA	NA
AATCCTTTAGAGATAGAGGAGTGCTCGAAAG	5	GAATCCTTTAGAGATAGAGGAGTGCTCGAAAGAGA	35	0.0298829845540608	7.222609	1	-2.85252	F	NA	NA	NA	NA	NA	NA	NA	NA	NA	NA	NA	NA	NA	NA	NA	NA	NA	NA	F	NA	NA	NA	NA	NA	NA	NA	NA	NA	NA	NA	NA	NA	NA	NA	NA	NA	NA	NA
ATAACGCTGCGCCAGCGGTTCCAGCTTGGTG	21	CGGACAACTCGCCCGGATAACGCTGCGCCAGCGGTTCCAGCTTGGTGGTCG	51	0.00955588926508664	19.518261	1.034667	-4.237586	F	NA	NA	NA	NA	NA	NA	NA	NA	NA	NA	NA	NA	NA	NA	NA	NA	NA	NA	F	NA	NA	NA	NA	NA	NA	NA	NA	NA	NA	NA	NA	NA	NA	NA	NA	NA	NA	NA
GCAAGCTTGCCCGATGACTGTGCCGGACCAC	8	GCGGGTGGTCCGGCACAGTCATCGGGCAAGCTTGCCGT	38	0.0414347475931097	44.621739	1	-5.479675	F	NA	NA	NA	NA	NA	NA	NA	NA	NA	NA	NA	NA	NA	NA	NA	NA	NA	NA	F	NA	NA	NA	NA	NA	NA	NA	NA	NA	NA	NA	NA	NA	NA	NA	NA	NA	NA	NA
CATGCAACGGCTGGATGCCGGCCGGCCGGAA	14	GCCGCCTACATGTTCCGGCCGGCCGGCATCCAGCCGTTGCATGG	44	0.0395860634264976	28.394783	1.880667	-3.91631	F	NA	NA	NA	NA	NA	NA	NA	NA	NA	NA	NA	NA	NA	NA	NA	NA	NA	NA	F	NA	NA	NA	NA	NA	NA	NA	NA	NA	NA	NA	NA	NA	NA	NA	NA	NA	NA	NA
CCCGGCGAGGCCTACTCGCTTCACGGCGTCG	3	CGACGCCGTGAAGCGAGTAGGCCTCGCCGGGCA	33	0.0404993296448331	1	5.991333	2.582877	F	NA	NA	NA	NA	NA	NA	NA	NA	NA	NA	NA	NA	NA	NA	NA	NA	NA	NA	F	NA	NA	NA	NA	NA	NA	NA	NA	NA	NA	NA	NA	NA	NA	NA	NA	NA	NA	NA
CCCGTCCTCCGTGATCTTCCAAAGCTTCACG	1	CCCGTCCTCCGTGATCTTCCAAAGCTTCACG	31	0.0464642880864091	27.16913	2.085	-3.703849	T	10761	chrX	126308413	126308428	NA	15S16M	0	0	0	1	0	15	F	T	0.516129032258065	0.9375	1	1	F	NA	NA	NA	NA	NA	NA	NA	NA	NA	ENSG00000198354	-	DCAF12L2	142125	ENSG00000230916	+	MTCO1P53	163276	NA	NA
GCTCGTAGCGGGTGGGGGCGCGGCGCGCGAA	1	GCTCGTAGCGGGTGGGGGCGCGGCGCGCGAA	31	0.0272811704927808	103.523478	3.958667	-4.708799	T	18515	chr14	22980872	22980894	NA	8S23M	0	0	0	2	0	8	F	T	0.741935483870968	0.91304347826087	1	2	F	NA	ENSG00000129474	AJUBA	-	protein_coding	NA	NA	NA	NA	NA	NA	NA	NA	NA	NA	NA	NA	F	T
AGGTCGGCATTGCGTGTGCACTCCACCCGGG	23	CGTAGCGCACACGAAACCCGGGTGGAGTGCACACGCAATGCCGACCTTTACCA	53	0.00542301441085052	48.861739	1.522333	-5.004349	F	NA	NA	NA	NA	NA	NA	NA	NA	NA	NA	NA	NA	NA	NA	NA	NA	NA	NA	F	NA	NA	NA	NA	NA	NA	NA	NA	NA	NA	NA	NA	NA	NA	NA	NA	NA	NA	NA
CCGCCATCAGAGCGCCACTCTGCGAAAGCCC	6	CACCGCCATCAGAGCGCCACTCTGCGAAAGCCCGAG	36	0.0452096554153421	17.572609	2.137	-3.03967	F	NA	NA	NA	NA	NA	NA	NA	NA	NA	NA	NA	NA	NA	NA	NA	NA	NA	NA	F	NA	NA	NA	NA	NA	NA	NA	NA	NA	NA	NA	NA	NA	NA	NA	NA	NA	NA	NA
CAGGACGAGGGACGGGGTGAATGAGGGGTTC	7	CCAGGACGAGGGACGGGGTGAATGAGGGGTTCTCGCG	37	0.0456947600195313	22.722609	1	-4.506057	F	NA	NA	NA	NA	NA	NA	NA	NA	NA	NA	NA	NA	NA	NA	NA	NA	NA	NA	F	NA	NA	NA	NA	NA	NA	NA	NA	NA	NA	NA	NA	NA	NA	NA	NA	NA	NA	NA
CCGTTGAACTTCTCCAGCATCTCCTCGGCCG	17	GAACCCTTCCAAGGGCCGTTGAACTTCTCCAGCATCTCCTCGGCCGGCGA	50	0.0201387241491508	38.933913	1.950667	-4.318988	F	NA	NA	NA	NA	NA	NA	NA	NA	NA	NA	NA	NA	NA	NA	NA	NA	NA	NA	F	NA	NA	NA	NA	NA	NA	NA	NA	NA	NA	NA	NA	NA	NA	NA	NA	NA	NA	NA
CCGGCGGGCACCGTGCATGGCGGTCTCACCG	29	ACGCGCATCTCAATCCGGCGGGCACCGTGCATGGCGGTCTCACCGCGACACTGCTCGAC	59	0.0416928229518443	10.616522	1	-3.408239	F	NA	NA	NA	NA	NA	NA	NA	NA	NA	NA	NA	NA	NA	NA	NA	NA	NA	NA	F	NA	NA	NA	NA	NA	NA	NA	NA	NA	NA	NA	NA	NA	NA	NA	NA	NA	NA	NA
AATTGAACACGACTGACAGAACGGAGCGTCC	5	CGGAATTGAACACGACTGACAGAACGGAGCGTCCG	35	0.0457404916724542	30.287826	3.667333	-3.045935	F	NA	NA	NA	NA	NA	NA	NA	NA	NA	NA	NA	NA	NA	NA	NA	NA	NA	NA	F	NA	NA	NA	NA	NA	NA	NA	NA	NA	NA	NA	NA	NA	NA	NA	NA	NA	NA	NA
ATGGAATCGCATGGAATCATCATCAAAAGGA	34	ATTGAATGGAAATGAAAGGGGTCATCAACTAATGGAATCGCATGGAATCATCATCAAAAGGAAT	64	0.021046837619511	119.035652	1.389333	-6.420857	T	7857	chr1	143215504	143215567	NA	64M	0	0	0	2	0	0	F	F	1	0.96875	3	2	F	NA	NA	NA	NA	NA	NA	NA	NA	NA	ENSG00000224857	-	LINC01691	21634981	ENSG00000276118	+	AC242852.1	127612	NA	NA
ATCGCAAGATGAAGCCCTTTCCCGCTACAGC	20	CCACGTGGCTCCCCCGTCATCGCAAGATGAAGCCCTTTCCCGCTACAGCG	50	0.020456048615972	36.313913	2.499667	-3.860715	F	NA	NA	NA	NA	NA	NA	NA	NA	NA	NA	NA	NA	NA	NA	NA	NA	NA	NA	F	NA	NA	NA	NA	NA	NA	NA	NA	NA	NA	NA	NA	NA	NA	NA	NA	NA	NA	NA
CGGATTGTTCGTTTTCTCGCAGCGCAGCAAC	52	ATGGGAACGCCTGCCCTTTACGAATGGTTAGATGAGAATCCGAAAGTACAGTTGCTGCGCTGCGAGAAAACGAACAATCCGAGTTTTATT	90	0.0388030844970833	32.141304	1	-5.006357	F	NA	NA	NA	NA	NA	NA	NA	NA	NA	NA	NA	NA	NA	NA	NA	NA	NA	NA	F	NA	NA	NA	NA	NA	NA	NA	NA	NA	NA	NA	NA	NA	NA	NA	NA	NA	NA	NA
CCCGCGAGTACCTCGTTATCGAGTACGCGCC	1	CCCGCGAGTACCTCGTTATCGAGTACGCGCC	31	0.0465976429865029	36.55	1.107333	-5.04471	F	NA	NA	NA	NA	NA	NA	NA	NA	NA	NA	NA	NA	NA	NA	NA	NA	NA	NA	F	NA	NA	NA	NA	NA	NA	NA	NA	NA	NA	NA	NA	NA	NA	NA	NA	NA	NA	NA
CGCCGTTCTTGCCGATCGGAATGTCGAAATC	3	GTCGCCGTTCTTGCCGATCGGAATGTCGAAATC	33	0.0471474323226832	22.363913	1	-4.483101	F	NA	NA	NA	NA	NA	NA	NA	NA	NA	NA	NA	NA	NA	NA	NA	NA	NA	NA	F	NA	NA	NA	NA	NA	NA	NA	NA	NA	NA	NA	NA	NA	NA	NA	NA	NA	NA	NA
CCTGACAAAGGCAGGAGAATGCTTTCTTCCG	9	GCCTGACAAAGGCAGGAGAATGCTTTCTTCCGCGGGCAC	39	0.0457948508331038	6.83087	1	-2.772069	F	NA	NA	NA	NA	NA	NA	NA	NA	NA	NA	NA	NA	NA	NA	NA	NA	NA	NA	F	NA	NA	NA	NA	NA	NA	NA	NA	NA	NA	NA	NA	NA	NA	NA	NA	NA	NA	NA
CGATGCCAAGTCCCAACAGGGAGTCGAGCAG	20	CTGAACACGGCGATGCCAAGTCCCAACAGGGAGTCGAGCAGGAAGAGCAG	50	0.0187722927688973	12.572174	1	-3.652162	F	NA	NA	NA	NA	NA	NA	NA	NA	NA	NA	NA	NA	NA	NA	NA	NA	NA	NA	T	chr16:1676077:+|chrX:12034600:+	NA	NA	NA	NA	NA	NA	NA	NA	NA	NA	NA	NA	NA	NA	NA	NA	NA	NA
ACTTCGCGGGCGAGCTCTCGTCGACCCAGAG	16	AAACGTCGAAGACCTCTGGGTCGACGAGAGCTCGCCCGCGAAGTGA	46	0.0284240186747224	10.207391	2.652	-1.944461	F	NA	NA	NA	NA	NA	NA	NA	NA	NA	NA	NA	NA	NA	NA	NA	NA	NA	NA	F	NA	NA	NA	NA	NA	NA	NA	NA	NA	NA	NA	NA	NA	NA	NA	NA	NA	NA	NA
CAATCGGCCGGGCCGGCTCTACTCTTTTGTC	6	GACAGACAAAAGAGTAGAGCCGGCCCGGCCGATTGT	36	0.0389171234853522	23.187826	1	-4.535296	T	8666	chr7	1841068	1841085	NA	8S18M10S	0	0	0	0	10	8	T	T	0.5	1	2	0	F	NA	ENSG00000286192	AC069288.1	-	protein_coding	NA	NA	NA	NA	NA	NA	NA	NA	NA	NA	NA	NA	F	T
AACTTGCCACTGGCGCTTACGCGCAATCGCT	1	AACTTGCCACTGGCGCTTACGCGCAATCGCT	31	0.0466499550447297	14.193043	5.823667	-1.285184	F	NA	NA	NA	NA	NA	NA	NA	NA	NA	NA	NA	NA	NA	NA	NA	NA	NA	NA	F	NA	NA	NA	NA	NA	NA	NA	NA	NA	NA	NA	NA	NA	NA	NA	NA	NA	NA	NA
CCCGGGGTGATGATGATCGAGGCGATGGCGC	5	ATCCCGGGGTGATGATGATCGAGGCGATGGCGCAG	35	0.0409997619740549	1	6.259333	2.646009	F	NA	NA	NA	NA	NA	NA	NA	NA	NA	NA	NA	NA	NA	NA	NA	NA	NA	NA	F	NA	NA	NA	NA	NA	NA	NA	NA	NA	NA	NA	NA	NA	NA	NA	NA	NA	NA	NA
ACCGGGCGAAGGCCTCGGAGGGATAGAAAAG	6	GTTGGACCGGGCGAAGGCCTCGGAGGGATAGAAAAG	36	0.0478626953014704	17.999565	2.481	-2.858968	F	NA	NA	NA	NA	NA	NA	NA	NA	NA	NA	NA	NA	NA	NA	NA	NA	NA	NA	F	NA	NA	NA	NA	NA	NA	NA	NA	NA	NA	NA	NA	NA	NA	NA	NA	NA	NA	NA
AGCTCGGCCGCGCTTATAGCGCAACCGCTGC	7	AGCAGCGGTTGCGCTATAAGCGCGGCCGAGCTCGACG	37	0.0103823110213503	23.248261	1	-4.539051	F	NA	NA	NA	NA	NA	NA	NA	NA	NA	NA	NA	NA	NA	NA	NA	NA	NA	NA	F	NA	NA	NA	NA	NA	NA	NA	NA	NA	NA	NA	NA	NA	NA	NA	NA	NA	NA	NA
GAAACAAGACCGCCGCCGGCTGGCGGCCGGC	1	GAAACAAGACCGCCGCCGGCTGGCGGCCGGC	31	0.0319987398147631	20.203478	1	-4.336532	T	16229	chr17	7836460	7836475	NA	15S16M	0	0	0	0	0	15	F	T	0.516129032258065	1	1	0	F	NA	NA	NA	NA	NA	NA	NA	NA	NA	ENSG00000183914	+	DNAH2	2717	ENSG00000132510	+	KDM6B	3428	NA	NA
AAGAAACCGTAATTTTATTATTAGATTCCCC	3	AAAAGAAACCGTAATTTTATTATTAGATTCCCC	33	0.0182484439931318	1	9.604333	3.263685	T	867	chr8	19966131	19966163	NA	33M	0	0	0	1	0	0	F	F	1	0.96969696969697	1	1	F	NA	ENSG00000175445	LPL	+	protein_coding	NA	NA	NA	NA	NA	NA	NA	NA	NA	NA	NA	NA	T	F
AGCGCGCTCGACATGTGCTTCGGCATTCCGC	2	CAGCGCGCTCGACATGTGCTTCGGCATTCCGC	32	0.0435436598242119	58.785652	1.523	-5.270476	F	NA	NA	NA	NA	NA	NA	NA	NA	NA	NA	NA	NA	NA	NA	NA	NA	NA	NA	F	NA	NA	NA	NA	NA	NA	NA	NA	NA	NA	NA	NA	NA	NA	NA	NA	NA	NA	NA
CTGTTCATCCTGCGCGGCGTGCCCGGCCACA	1	CTGTTCATCCTGCGCGGCGTGCCCGGCCACA	31	0.046119608427093	6.937391	16.615667	1.260079	T	15987	chr6	164927754	164927769	NA	15S16M	0	0	0	0	0	15	F	T	0.516129032258065	1	3	0	F	NA	NA	NA	NA	NA	NA	NA	NA	NA	ENSG00000227455	+	AL450345.1	95641	ENSG00000287877	+	AL133538.1	421	NA	NA
ACTCGGTCGGCGTCAGCCTGACATTGGCCCC	7	GCCACTCGGTCGGCGTCAGCCTGACATTGGCCCCGTC	37	0.0328909478515874	67.14	1.425333	-5.557802	F	NA	NA	NA	NA	NA	NA	NA	NA	NA	NA	NA	NA	NA	NA	NA	NA	NA	NA	F	NA	NA	NA	NA	NA	NA	NA	NA	NA	NA	NA	NA	NA	NA	NA	NA	NA	NA	NA
AGCTGGCTTTCGCAGTTGCAGGGCTTGTTTA	30	ATACATACGTACCGAATGTTTGTAAACAAGCCCTGCAACTGCGAAAGCCAGCTATGCGACG	61	0.0166060192706219	7.230435	1.635	-2.144792	F	NA	NA	NA	NA	NA	NA	NA	NA	NA	NA	NA	NA	NA	NA	NA	NA	NA	NA	F	NA	NA	NA	NA	NA	NA	NA	NA	NA	NA	NA	NA	NA	NA	NA	NA	NA	NA	NA
GCGCGGTTCAAGGCGCAGGGGACTGCGCTAA	13	ATTAGCGCAGTCCCCTGCGCCTTGAACCGCGCCAGCTGGTCGT	43	0.0382596304412801	13.56913	1.825333	-2.894097	F	NA	NA	NA	NA	NA	NA	NA	NA	NA	NA	NA	NA	NA	NA	NA	NA	NA	NA	F	NA	NA	NA	NA	NA	NA	NA	NA	NA	NA	NA	NA	NA	NA	NA	NA	NA	NA	NA
ACGCAGCAGCATATAGATCGCCACGACGATA	15	TTGACGTTACGCAGCAGCATATAGATCGCCACGACGATAATCACA	45	0.0260337059142702	1	8.586	3.101986	F	NA	NA	NA	NA	NA	NA	NA	NA	NA	NA	NA	NA	NA	NA	NA	NA	NA	NA	F	NA	NA	NA	NA	NA	NA	NA	NA	NA	NA	NA	NA	NA	NA	NA	NA	NA	NA	NA
GCGCGATCAGGAACGTTTGAGATACGCGCAC	12	GCGCGCGATCAGGAACGTTTGAGATACGCGCACTGGCAGCTG	42	0.0372685102913394	7.988261	1	-2.997881	F	NA	NA	NA	NA	NA	NA	NA	NA	NA	NA	NA	NA	NA	NA	NA	NA	NA	NA	F	NA	NA	NA	NA	NA	NA	NA	NA	NA	NA	NA	NA	NA	NA	NA	NA	NA	NA	NA
CCTACCCTTTTCCCCACCCCGCCCCTCTCCC	4	CCCTACCCTTTTCCCCACCCCGCCCCTCTCCCGA	34	0.0474181345691699	157.89087	1.349	-6.870894	T	11701	chr19	46934357	46934379	NA	5S23M6S	0	0	0	1	6	5	T	T	0.676470588235294	0.956521739130435	1	1	F	NA	ENSG00000160007	ARHGAP35	+	protein_coding	NA	NA	NA	NA	NA	NA	NA	NA	NA	NA	NA	NA	F	T
GGATTTGCGTTAGCGCCCTGCCATGGCCGAC	2	CGGATTTGCGTTAGCGCCCTGCCATGGCCGAC	32	0.039338857896823	23.848696	3.843667	-2.633355	T	18901	chr10	822859	822875	NA	15S17M	0	0	0	1	0	15	F	T	0.53125	0.941176470588235	1	1	F	NA	ENSG00000107929	LARP4B	-	protein_coding	NA	NA	NA	NA	NA	NA	NA	NA	NA	NA	NA	NA	F	T
CCACATCTACACCCTAGCCTACACTCTTTCC	3	GCCCACATCTACACCCTAGCCTACACTCTTTCC	33	0.0336381127310233	82.512609	1.112	-6.213386	T	10052	chrX	71372683	71372698	NA	16M17S	0	0	0	0	17	0	T	F	0.484848484848485	1	1	0	F	NA	ENSG00000147133	TAF1	+	protein_coding	NA	NA	NA	NA	NA	NA	NA	NA	NA	NA	NA	NA	F	T
CGCCGGGCTCTCGTTGCCGATCGTGGTATTC	9	CAATCTCGCCGGGCTCTCGTTGCCGATCGTGGTATTCGT	39	0.0414506649591674	1	7.895	2.980939	F	NA	NA	NA	NA	NA	NA	NA	NA	NA	NA	NA	NA	NA	NA	NA	NA	NA	NA	F	NA	NA	NA	NA	NA	NA	NA	NA	NA	NA	NA	NA	NA	NA	NA	NA	NA	NA	NA
CAAACTGAATGGAATGGAAAGGAATGTAATC	34	CCTTCAAACTGAATGGAATGGAAAGGAATGTAATCAACACGAGTGGAATGGAATCGAATGGAAGGGAATCGAAAGGAATGGACTCGAAGGGAA	93	0.0240740103952244	82.31913	1.091	-6.237505	T	8523	chr10	38829703	38829773	NA	9S71M13S	0	0	0	8	13	9	T	T	0.763440860215054	0.887323943661972	1	8	F	NA	NA	NA	NA	NA	NA	NA	NA	NA	ENSG00000233832	+	AL590623.1	46596	ENSG00000229485	-	KSR1P1	3319536	NA	NA
GCGGAAACGGCCGATGCGAGGTATTTGACGC	12	CCAGACCGAAAGCGTCAAATACCTCGCATCGGCCGTTTCCGC	42	0.0265900666139927	12.36	1.370667	-3.172729	F	NA	NA	NA	NA	NA	NA	NA	NA	NA	NA	NA	NA	NA	NA	NA	NA	NA	NA	F	NA	NA	NA	NA	NA	NA	NA	NA	NA	NA	NA	NA	NA	NA	NA	NA	NA	NA	NA
GCTCGGCCAGCTTGTACTTGTTAACGCCGAC	17	GTCGGCGTTAACAAGTACAAGCTGGCCGAGCAGGACCCGATCGACAT	47	0.0478465225668588	36.522174	1	-5.190701	F	NA	NA	NA	NA	NA	NA	NA	NA	NA	NA	NA	NA	NA	NA	NA	NA	NA	NA	F	NA	NA	NA	NA	NA	NA	NA	NA	NA	NA	NA	NA	NA	NA	NA	NA	NA	NA	NA
GGTTCTGCTCGCCCATGAAAGGGCGTCACAC	4	GCAGGTTCTGCTCGCCCATGAAAGGGCGTCACAC	34	0.0285000810173915	9.058696	1	-3.179303	F	NA	NA	NA	NA	NA	NA	NA	NA	NA	NA	NA	NA	NA	NA	NA	NA	NA	NA	F	NA	NA	NA	NA	NA	NA	NA	NA	NA	NA	NA	NA	NA	NA	NA	NA	NA	NA	NA
AACAATTTTCCCGACCTGAACGCTGCCCTCG	1	AACAATTTTCCCGACCTGAACGCTGCCCTCG	31	0.0350158891632444	36.767391	1.224	-4.908751	T	474	chr4	5994712	5994727	NA	16M15S	0	0	0	0	15	0	T	F	0.516129032258065	1	2	0	F	NA	ENSG00000181215	C4orf50	-	protein_coding	NA	NA	NA	NA	NA	NA	NA	NA	NA	NA	NA	NA	F	T
AGCGACGGGTGCTCAACGCCGGCGACGCCTA	5	CGAGCGACGGGTGCTCAACGCCGGCGACGCCTATT	35	0.0402346884638393	1.082174	6.050667	2.483162	F	NA	NA	NA	NA	NA	NA	NA	NA	NA	NA	NA	NA	NA	NA	NA	NA	NA	NA	F	NA	NA	NA	NA	NA	NA	NA	NA	NA	NA	NA	NA	NA	NA	NA	NA	NA	NA	NA
GCCAAGCCCGTAGCCGGCCGCCGTCAGCAGC	60	GCCAGGACCAGCACGCCGTTGCCGATCGGCTCGATGAGGCGGCCCACGCTGCGGTAGTTCTCGCCAAGCCCGTAGCCGGCCGCCGTCAGCAGCCC	95	0.0201387241491508	10.177391	1	-3.347296	F	NA	NA	NA	NA	NA	NA	NA	NA	NA	NA	NA	NA	NA	NA	NA	NA	NA	NA	F	NA	NA	NA	NA	NA	NA	NA	NA	NA	NA	NA	NA	NA	NA	NA	NA	NA	NA	NA
AACAGATGCAGCACTGCCGCCACGGCAACAA	15	GCTAAAATTGCAGATTGTTGCCGTGGCGGCAGTGCTGCATCTGTT	45	0.0299732464296459	13.308261	2.996333	-2.151052	F	NA	NA	NA	NA	NA	NA	NA	NA	NA	NA	NA	NA	NA	NA	NA	NA	NA	NA	F	NA	NA	NA	NA	NA	NA	NA	NA	NA	NA	NA	NA	NA	NA	NA	NA	NA	NA	NA
CTTGGAACCGCGTCGGACCCCGAACATGAGC	4	GGCCTTACCTTGGAACCGCGTCGGACCCCGAACATGAGCCA	41	0.0388906774154523	44.24913	4.109667	-3.428556	F	NA	NA	NA	NA	NA	NA	NA	NA	NA	NA	NA	NA	NA	NA	NA	NA	NA	NA	F	NA	NA	NA	NA	NA	NA	NA	NA	NA	NA	NA	NA	NA	NA	NA	NA	NA	NA	NA
GCTCGTTCGAAAATCACATCCCGGTTCGGAC	7	CGTCCGAACCGGGATGTGATTTTCGAACGAGCCGCAG	37	0.0460804277647942	31.323043	1.076333	-4.863028	F	NA	NA	NA	NA	NA	NA	NA	NA	NA	NA	NA	NA	NA	NA	NA	NA	NA	NA	F	NA	NA	NA	NA	NA	NA	NA	NA	NA	NA	NA	NA	NA	NA	NA	NA	NA	NA	NA
GCATCACCTGGGTGATCAGTGCAGATATATA	1	GCATCACCTGGGTGATCAGTGCAGATATATA	31	0.0376377613326335	91.984783	1	-6.523323	T	17460	GL000225.1	67512	67542	NA	31M	0	0	0	1	0	0	F	F	1	0.967741935483871	2	1	F	NA	NA	NA	NA	NA	NA	NA	NA	NA	NA	NA	NA	NA	NA	NA	NA	NA	NA	NA
AGGAGCTGGTCGAGCTCGCCTATCGCGACAT	8	CATCAAGGAGCTGGTCGAGCTCGCCTATCGCGACATTC	38	0.0494487325059577	15.523043	1.235	-3.651828	F	NA	NA	NA	NA	NA	NA	NA	NA	NA	NA	NA	NA	NA	NA	NA	NA	NA	NA	F	NA	NA	NA	NA	NA	NA	NA	NA	NA	NA	NA	NA	NA	NA	NA	NA	NA	NA	NA
CTGCACGCCGACCTGCGAGCCGGAAGCCGTA	18	AGGTCACGCACAGCGATACGGCTTCCGGCTCGCAGGTCGGCGTGCAGC	48	0.034353307875895	32.443478	1.381333	-4.553795	F	NA	NA	NA	NA	NA	NA	NA	NA	NA	NA	NA	NA	NA	NA	NA	NA	NA	NA	F	NA	NA	NA	NA	NA	NA	NA	NA	NA	NA	NA	NA	NA	NA	NA	NA	NA	NA	NA
ACCGCCTGTCCCCGCCGGCGGGCCGCCCCCC	1	ACCGCCTGTCCCCGCCGGCGGGCCGCCCCCC	31	0.0452517315800808	1.391739	6.558	2.236367	T	2444	chr21	8401683	8401713	NA	31M	0	0	0	1	0	0	F	F	1	0.967741935483871	2	1	F	NA	ENSG00000280441	FP236383.1	+	lncRNA	NA	NA	NA	NA	NA	NA	NA	NA	NA	NA	NA	NA	F	T
CGTTTGGGCGAAACTTGTCTGCGATAACGCC	4	CGTTTGGGCGAAACTTGTCTGCGATAACGCCCGCCTCGAA	40	0.0303432246103733	1	5.433667	2.441926	F	NA	NA	NA	NA	NA	NA	NA	NA	NA	NA	NA	NA	NA	NA	NA	NA	NA	NA	F	NA	NA	NA	NA	NA	NA	NA	NA	NA	NA	NA	NA	NA	NA	NA	NA	NA	NA	NA
ACGGTCACCGGTCTGCTGGGGCAGTTTATCC	26	GTAAACCCGATCCTTGATGCCAGCACGGTCACCGGTCTGCTGGGGCAGTTTATCCA	56	0.0309733418288215	7.166522	1	-2.841273	T	3325	chr5	139478309	139478364	NA	56M	0	0	0	1	0	0	F	F	1	0.982142857142857	1	1	F	NA	ENSG00000184584	TMEM173	-	protein_coding	NA	NA	NA	NA	NA	NA	NA	NA	NA	NA	NA	NA	T	F
CTGGCTCGAGCAGCAGGGCCGGATGACGGGC	15	GCGGTGTTCTGCGACTGGCTCGAGCAGCAGGGCCGGATGACGGGC	45	0.031341753897541	1	5.143	2.36261	F	NA	NA	NA	NA	NA	NA	NA	NA	NA	NA	NA	NA	NA	NA	NA	NA	NA	NA	F	NA	NA	NA	NA	NA	NA	NA	NA	NA	NA	NA	NA	NA	NA	NA	NA	NA	NA	NA
AGCCGATCACGCCGCCGAACAGGCCGGTGAC	43	GACGATCGCGAGCACGACGGAGCCGATCACGCCGCCGAACAGGCCGGTGACGATGCGGCCGAGCAACAGCACG	73	0.0362399571745467	1	5.218667	2.383681	F	NA	NA	NA	NA	NA	NA	NA	NA	NA	NA	NA	NA	NA	NA	NA	NA	NA	NA	F	NA	NA	NA	NA	NA	NA	NA	NA	NA	NA	NA	NA	NA	NA	NA	NA	NA	NA	NA
GAACGAACCGTCGAAAGCCGGCAAGCCGGAA	8	GCTGAACGAACCGTCGAAAGCCGGCAAGCCGGAATCCT	38	0.0440306136980754	1.258696	10.508333	3.061532	F	NA	NA	NA	NA	NA	NA	NA	NA	NA	NA	NA	NA	NA	NA	NA	NA	NA	NA	F	NA	NA	NA	NA	NA	NA	NA	NA	NA	NA	NA	NA	NA	NA	NA	NA	NA	NA	NA
CGATGGTGCGGTTGGGGCTGGGAACCGCCGA	56	CACAGTGTGGTGGTCGAGATCAATCACGACGCGATGGTGCGGTTGGGGCTGGGAACCGCCGAGGTCAACCGTGCCATTGCGTCAGC	86	0	33.18	1.783333	-4.217666	F	NA	NA	NA	NA	NA	NA	NA	NA	NA	NA	NA	NA	NA	NA	NA	NA	NA	NA	F	NA	NA	NA	NA	NA	NA	NA	NA	NA	NA	NA	NA	NA	NA	NA	NA	NA	NA	NA
ATGGACACCGACATCGACACCTGGACCCACG	32	TCGGCACCATGGACACCGACATCGACACCTGGACCCACGTCTTCCACGTCAACTTCTTCGCC	62	0.0220189413114465	1	8.298	3.052764	F	NA	NA	NA	NA	NA	NA	NA	NA	NA	NA	NA	NA	NA	NA	NA	NA	NA	NA	F	NA	NA	NA	NA	NA	NA	NA	NA	NA	NA	NA	NA	NA	NA	NA	NA	NA	NA	NA
CCGGTTCAGCGTGATGGTCAGGATCTGCTCG	20	TCGCCGAGCAGATCCTGACCATCACGCTGAACCGGCCCGACAAGCTCAAC	50	0.0375454332166112	1	6.618667	2.726541	F	NA	NA	NA	NA	NA	NA	NA	NA	NA	NA	NA	NA	NA	NA	NA	NA	NA	NA	F	NA	NA	NA	NA	NA	NA	NA	NA	NA	NA	NA	NA	NA	NA	NA	NA	NA	NA	NA
CGCATCGACGCTTGCCCGCCGCTCGCGCTCC	13	AAGAGCGGTCAGCGCATCGACGCTTGCCCGCCGCTCGCGCTCCAAAGCCC	50	0.0346474704443217	2.852174	8.743667	1.616176	F	NA	NA	NA	NA	NA	NA	NA	NA	NA	NA	NA	NA	NA	NA	NA	NA	NA	NA	F	NA	NA	NA	NA	NA	NA	NA	NA	NA	NA	NA	NA	NA	NA	NA	NA	NA	NA	NA
AGACCACCCAAGGGCGTCTGTCCTATTCGCT	71	CGGCGTAACCGATAGCTATCTTCGCCACTTGGCAGCATCAGGGGAGGGGCCCGAGGTCGATAAGACCACCCAAGGGCGTCTGTCCTATTCGCTTGAACAGGTTCAC	106	0.00169152547153182	52.761304	1.774333	-4.894132	F	NA	NA	NA	NA	NA	NA	NA	NA	NA	NA	NA	NA	NA	NA	NA	NA	NA	NA	F	NA	NA	NA	NA	NA	NA	NA	NA	NA	NA	NA	NA	NA	NA	NA	NA	NA	NA	NA
ATCGGCCCAGGAACCGGCAAAGCGACCCGAC	7	CGAGATCGGCCCAGGAACCGGCAAAGCGACCCGACAC	37	0.0224766764190257	1	11.307667	3.499229	F	NA	NA	NA	NA	NA	NA	NA	NA	NA	NA	NA	NA	NA	NA	NA	NA	NA	NA	F	NA	NA	NA	NA	NA	NA	NA	NA	NA	NA	NA	NA	NA	NA	NA	NA	NA	NA	NA
ATTGCAATCGTGTTGATTCCATTCCATTCCA	9	CTGGAATAGAATGGAATGGAATGGAATCAACACGATTGCAATCGAA	46	0.0253930246096851	1199.731739	104.219333	-3.525017	T	8418	chr2	89836911	89836945	NA	35M11S	0	0	0	2	11	0	T	F	0.760869565217391	0.942857142857143	1	2	F	NA	NA	NA	NA	NA	NA	NA	NA	NA	ENSG00000283659	+	AC006453.5	153708	ENSG00000251039	+	IGKV2D-40	14845	NA	NA
GGACACCGGAGAAAACCGAACTGATGAGAAC	27	ATCCGGGCTGGAGCGTGGTGAACAGGACACCGGAGAAAACCGAACTGATGAGAACTT	57	0.0310416303608351	1	4.585667	2.197132	F	NA	NA	NA	NA	NA	NA	NA	NA	NA	NA	NA	NA	NA	NA	NA	NA	NA	NA	F	NA	NA	NA	NA	NA	NA	NA	NA	NA	NA	NA	NA	NA	NA	NA	NA	NA	NA	NA
CCCAGATAAAGGCAGGTTGCACACGTGTTCC	50	ACGGGTGCGGAACACGTGTGCAACCTGCCTTTATCTGGGGGATAGCCTTTCGAAAGGAAGATTAATACCCCATAATATAT	80	0.00169152547153182	171.422609	1.593	-6.749667	F	NA	NA	NA	NA	NA	NA	NA	NA	NA	NA	NA	NA	NA	NA	NA	NA	NA	NA	F	NA	NA	NA	NA	NA	NA	NA	NA	NA	NA	NA	NA	NA	NA	NA	NA	NA	NA	NA
CGGCCTTCCTATCATTGTGAAGCAGAATTCA	5	TGTCGGCCTTCCTATCATTGTGAAGCAGAATTCAC	35	0.0410213374998711	1.296957	13.408	3.369892	T	14623	chr1	91387269	91387296	NA	28M7S	0	0	0	0	7	0	T	F	0.8	1	6	0	F	NA	ENSG00000162669	HFM1	-	protein_coding	NA	NA	NA	NA	NA	NA	NA	NA	NA	NA	NA	NA	F	T
CGCCTTGGCCAGCAGCTCCGACGTATAGCCG	3	GCCGCCTTGGCCAGCAGCTCCGACGTATAGCCG	33	0.0431477132391817	8.939565	1	-3.160205	T	13904	chr11	6320220	6320238	NA	19M14S	0	0	0	1	14	0	T	F	0.575757575757576	0.947368421052632	1	1	F	NA	ENSG00000170955	CAVIN3	-	protein_coding	NA	NA	NA	NA	NA	NA	NA	NA	NA	NA	NA	NA	T	F
AGCTTCTTCACCATGTCGGCTTCGGAGGAGA	13	CGCAGCTTCTTCACCATGTCGGCTTCGGAGGAGAAGTCGAGAT	43	0.0226946314134791	18.010435	1.091	-4.04511	F	NA	NA	NA	NA	NA	NA	NA	NA	NA	NA	NA	NA	NA	NA	NA	NA	NA	NA	F	NA	NA	NA	NA	NA	NA	NA	NA	NA	NA	NA	NA	NA	NA	NA	NA	NA	NA	NA
GTGTTCGCTGCGATCGGTGGCGCCATGTTCA	11	CGAGCGTGAACATGGCGCCACCGATCGCAGCGAACACCGCC	41	0.0426645381924198	1	7.855	2.973611	F	NA	NA	NA	NA	NA	NA	NA	NA	NA	NA	NA	NA	NA	NA	NA	NA	NA	NA	F	NA	NA	NA	NA	NA	NA	NA	NA	NA	NA	NA	NA	NA	NA	NA	NA	NA	NA	NA
CGCGATCGGCATCGTGGTCGACGACGCCATC	13	GGCCTGGTGCTCGCGATCGGCATCGTGGTCGACGACGCCATCGTCGTGGTCGAG	54	0.0188401410791291	42.356957	1	-5.404527	F	NA	NA	NA	NA	NA	NA	NA	NA	NA	NA	NA	NA	NA	NA	NA	NA	NA	NA	F	NA	NA	NA	NA	NA	NA	NA	NA	NA	NA	NA	NA	NA	NA	NA	NA	NA	NA	NA
GCCCCGATGCCGAAGAAGGCGACATGGCCCA	8	GCCTGGGCCATGTCGCCTTCTTCGGCATCGGGGCCTACACCAGCGCGCTGGTCTCGC	57	0.023453969273743	6.894783	1	-2.785505	F	NA	NA	NA	NA	NA	NA	NA	NA	NA	NA	NA	NA	NA	NA	NA	NA	NA	NA	F	NA	NA	NA	NA	NA	NA	NA	NA	NA	NA	NA	NA	NA	NA	NA	NA	NA	NA	NA
ACTCGATGTTCCACCAGTCGTCGAACTGGCC	18	CCCGCGCGGCCAGTTCGACGACTGGTGGAACATCGAGTCCGACATCCA	48	0.030891526153898	108.738261	1.462667	-6.216114	F	NA	NA	NA	NA	NA	NA	NA	NA	NA	NA	NA	NA	NA	NA	NA	NA	NA	NA	F	NA	NA	NA	NA	NA	NA	NA	NA	NA	NA	NA	NA	NA	NA	NA	NA	NA	NA	NA
CCGCCGCCTCAGCTTGGCACACAAGGGTCCG	3	CCCGCCGCCTCAGCTTGGCACACAAGGGTCCGT	33	0.0338748455980512	6.740435	1.048667	-2.684285	T	11135	chr17	58335400	58335417	NA	9S18M6S	0	0	0	0	6	9	T	T	0.545454545454545	1	1	0	F	NA	ENSG00000265148	TSPOAP1-AS1	+	lncRNA	NA	NA	NA	NA	NA	NA	NA	NA	NA	NA	NA	NA	F	T
CTTGTAAGCGCACGGTTTCAGGTACTATTTC	3	CTTGTAAGCGCACGGTTTCAGGTACTATTTCACTCCCCTTCC	42	0.031480603301806	7.964348	21.496667	1.432485	F	NA	NA	NA	NA	NA	NA	NA	NA	NA	NA	NA	NA	NA	NA	NA	NA	NA	NA	F	NA	NA	NA	NA	NA	NA	NA	NA	NA	NA	NA	NA	NA	NA	NA	NA	NA	NA	NA
CCTGTCCAGCCACTCGCCTACGCCTCTGGTA	27	GTAGATATCACGAGGAATACCAGAGGCGTAGGCGAGTGGCTGGACAGGAATTGACGC	57	0.0293024536256944	10.17913	3.158333	-1.688379	F	NA	NA	NA	NA	NA	NA	NA	NA	NA	NA	NA	NA	NA	NA	NA	NA	NA	NA	F	NA	NA	NA	NA	NA	NA	NA	NA	NA	NA	NA	NA	NA	NA	NA	NA	NA	NA	NA
TATATATTTTATACTGTACATCAAATATCAA	28	TACCCCAAATATATATTTTATACTGTACATCAAATATCAAAGTTCACAAACTATATAT	58	0.0203838112821823	108.833043	3.411	-4.995778	T	20072	chr3	93470365	93470422	NA	58M	0	0	0	3	0	0	F	F	1	0.948275862068966	1	3	F	NA	NA	NA	NA	NA	NA	NA	NA	NA	ENSG00000283544	-	ABBA01000935.2	1956591	ENSG00000251727	+	RNU6-488P	373341	NA	NA
AGCGTGGTGCCGTCGTCGAACTTGATCCGCG	27	ATGCGCAGCGTGGTGCCGTCGTCGAACTTGATCCGCGCCGAGCCCTGGATCTGCGCG	57	0.020682387640803	1	8.706667	3.122121	F	NA	NA	NA	NA	NA	NA	NA	NA	NA	NA	NA	NA	NA	NA	NA	NA	NA	NA	F	NA	NA	NA	NA	NA	NA	NA	NA	NA	NA	NA	NA	NA	NA	NA	NA	NA	NA	NA
CCGCATCACCCTCGGTGACGGTGAAACCTAC	1	CCGCATCACCCTCGGTGACGGTGAAACCTAC	31	0.0345308819997614	10.365652	1	-3.373739	F	NA	NA	NA	NA	NA	NA	NA	NA	NA	NA	NA	NA	NA	NA	NA	NA	NA	NA	F	NA	NA	NA	NA	NA	NA	NA	NA	NA	NA	NA	NA	NA	NA	NA	NA	NA	NA	NA
GCGAGCACGGTTCGCAATGGGCCGCGATCCA	8	AGCGAGCACGGTTCGCAATGGGCCGCGATCCAGTCGAT	38	0.0234159803707449	6.804783	1	-2.766549	T	17978	chr2	196860469	196860488	NA	10S20M8S	0	0	0	1	8	10	T	T	0.526315789473684	0.95	1	1	F	NA	ENSG00000197121	PGAP1	-	protein_coding	NA	NA	NA	NA	NA	NA	NA	NA	NA	NA	NA	NA	F	T
AGAGATTGAACCTTTGTGTTTTTGTTTTCCC	5	GGGAAAACAAAAACACAAAGGTTCAATCTCTTCTG	35	0.0434348300104092	55.193913	1	-5.786437	T	4182	chr7	114691144	114691163	NA	15S20M	0	0	0	0	0	15	F	T	0.571428571428571	1	1	0	F	NA	ENSG00000128573	FOXP2	+	protein_coding	NA	NA	NA	NA	NA	NA	NA	NA	NA	NA	NA	NA	T	F
ATCATTGATGCGACAACCCCAGCCGAATCAG	38	GCGAACCACAGCAGGCGCTGGCCGAGCGGCCGCTGATTCGGCTGGGGTTGTCGCATCAATGATATCCGTGGCCGGGGCGCA	81	0.00340365003546938	65.964348	2.019667	-5.029497	F	NA	NA	NA	NA	NA	NA	NA	NA	NA	NA	NA	NA	NA	NA	NA	NA	NA	NA	F	NA	NA	NA	NA	NA	NA	NA	NA	NA	NA	NA	NA	NA	NA	NA	NA	NA	NA	NA
CATCGCTCGGTGCTGATGGCGCAGGGCGACG	34	GCGCGAGCTCGAGAACACCATCCATCGCTCGGTGCTGATGGCGCAGGGCGACGAGATCGGTCCC	64	0.032118926450876	1	9.255333	3.210285	F	NA	NA	NA	NA	NA	NA	NA	NA	NA	NA	NA	NA	NA	NA	NA	NA	NA	NA	F	NA	NA	NA	NA	NA	NA	NA	NA	NA	NA	NA	NA	NA	NA	NA	NA	NA	NA	NA
CCTTTTCTTACAGAGAGATATGCGAGCCGCA	7	CAAGTTTCCTTTTCTTACAGAGAGATATGCGAGCCGCACTTG	42	0.0369101907555903	38.884783	1.763667	-4.462556	F	NA	NA	NA	NA	NA	NA	NA	NA	NA	NA	NA	NA	NA	NA	NA	NA	NA	NA	F	NA	NA	NA	NA	NA	NA	NA	NA	NA	NA	NA	NA	NA	NA	NA	NA	NA	NA	NA
ACATCAGCGCGCAGGTGCCGGGGCATGACGA	10	CTACAATCACATCAGCGCGCAGGTGCCGGGGCATGACGAC	40	0.0347933701392285	1	6.729	2.750392	F	NA	NA	NA	NA	NA	NA	NA	NA	NA	NA	NA	NA	NA	NA	NA	NA	NA	NA	F	NA	NA	NA	NA	NA	NA	NA	NA	NA	NA	NA	NA	NA	NA	NA	NA	NA	NA	NA
AAGTCGGACACCGGCTGCTACACCGATCATG	11	AAGTCGGACACCGGCTGCTACACCGATCATGCAGATCCCGACC	43	0.0317035592103137	14.485217	3.241667	-2.159773	F	NA	NA	NA	NA	NA	NA	NA	NA	NA	NA	NA	NA	NA	NA	NA	NA	NA	NA	F	NA	NA	NA	NA	NA	NA	NA	NA	NA	NA	NA	NA	NA	NA	NA	NA	NA	NA	NA
ACCTCGCGATGGTCGATCCGGCCTGGTTGCG	5	CGCAACCAGGCCGGATCGACCATCGCGAGGTCAAC	35	0.0281750030356414	1	7.240667	2.856123	F	NA	NA	NA	NA	NA	NA	NA	NA	NA	NA	NA	NA	NA	NA	NA	NA	NA	NA	F	NA	NA	NA	NA	NA	NA	NA	NA	NA	NA	NA	NA	NA	NA	NA	NA	NA	NA	NA
TCGGCATAGAGAACGTGGAGTATGGCGCCGA	1	TCGGCATAGAGAACGTGGAGTATGGCGCCGA	31	0.0372685102913394	31.06913	3.979667	-2.964762	F	NA	NA	NA	NA	NA	NA	NA	NA	NA	NA	NA	NA	NA	NA	NA	NA	NA	NA	F	NA	NA	NA	NA	NA	NA	NA	NA	NA	NA	NA	NA	NA	NA	NA	NA	NA	NA	NA
CCGGTTCCAGGCGACGACGTCCCATGTTGCG	3	GCCCGGTTCCAGGCGACGACGTCCCATGTTGCG	33	0.0187722927688973	8.030435	1	-3.005478	F	NA	NA	NA	NA	NA	NA	NA	NA	NA	NA	NA	NA	NA	NA	NA	NA	NA	NA	F	NA	NA	NA	NA	NA	NA	NA	NA	NA	NA	NA	NA	NA	NA	NA	NA	NA	NA	NA
CGGCGCGGATCGGGCCGATCACGCCCGAGGA	7	GCCGTCGGCGCGGATCGGGCCGATCACGCCCGAGGAG	37	0.0423747719663628	25.181739	1	-4.654306	F	NA	NA	NA	NA	NA	NA	NA	NA	NA	NA	NA	NA	NA	NA	NA	NA	NA	NA	F	NA	NA	NA	NA	NA	NA	NA	NA	NA	NA	NA	NA	NA	NA	NA	NA	NA	NA	NA
CGCGTCCAGCCGGTTGCCGTCGCGGAGCCGC	24	GTCGCGAACGCACCGGCGTGCGGCTCCGCGACGGCAACCGGCTGGACGCGCGCG	54	0.0254466199184065	12.680435	1	-3.664532	F	NA	NA	NA	NA	NA	NA	NA	NA	NA	NA	NA	NA	NA	NA	NA	NA	NA	NA	F	NA	NA	NA	NA	NA	NA	NA	NA	NA	NA	NA	NA	NA	NA	NA	NA	NA	NA	NA
CGTTTCCTTTTCAAGGACGCTTTCGCAGTTC	56	GCCGGCCTTCAAAGAGTCGATGGGCGAACTGCGAAAGCGTCCTTGAAAAGGAAACGACTAGCGTCCTTCGAGCTTTGTGGGTCGCTTGGTGACGTTCATCA	101	0.00436579799818016	22.991304	1.402333	-4.035187	F	NA	NA	NA	NA	NA	NA	NA	NA	NA	NA	NA	NA	NA	NA	NA	NA	NA	NA	F	NA	NA	NA	NA	NA	NA	NA	NA	NA	NA	NA	NA	NA	NA	NA	NA	NA	NA	NA
ACGTTGACGCGGCCGCCGCTGATGCTGCGCG	5	ACCACGTTGACGCGGCCGCCGCTGATGCTGCGCGCC	36	0.0413680739487577	24.84087	1	-4.634644	F	NA	NA	NA	NA	NA	NA	NA	NA	NA	NA	NA	NA	NA	NA	NA	NA	NA	NA	F	NA	NA	NA	NA	NA	NA	NA	NA	NA	NA	NA	NA	NA	NA	NA	NA	NA	NA	NA
CGCCATTCTTCGACGTCGAGGCCGACGACGC	5	CCGCCATTCTTCGACGTCGAGGCCGACGACGCCGT	35	0.0290772339076602	65.583478	1.055667	-5.957106	F	NA	NA	NA	NA	NA	NA	NA	NA	NA	NA	NA	NA	NA	NA	NA	NA	NA	NA	F	NA	NA	NA	NA	NA	NA	NA	NA	NA	NA	NA	NA	NA	NA	NA	NA	NA	NA	NA
CGGCTTCGCGCCAGCTCTGCGCCGGCTGCAC	40	GACGGCTTCGCGCCAGCTCTGCGCCGGCTGCACATTGATCTCGATCACGCCGGGGTCGGGCGTCACCTTG	70	0.0399578521219876	1	6.181	2.62784	F	NA	NA	NA	NA	NA	NA	NA	NA	NA	NA	NA	NA	NA	NA	NA	NA	NA	NA	F	NA	NA	NA	NA	NA	NA	NA	NA	NA	NA	NA	NA	NA	NA	NA	NA	NA	NA	NA
CGCTGCAAGCACGCCATGAGCATCTGCACCG	8	CTGCTCGCTGCAAGCACGCCATGAGCATCTGCACCGAG	38	0.0148446780110497	1	8.427333	3.075076	T	14265	chr16	46629003	46629022	NA	18S20M	0	0	0	1	0	18	F	T	0.526315789473684	0.95	2	1	F	NA	NA	NA	NA	NA	NA	NA	NA	NA	ENSG00000259856	-	RAB43P1	2012	ENSG00000260909	+	AC012186.1	20103	NA	NA
ACCTTGAGCGGCACCGGCGTCGTCGATCCCG	41	GCTTGCGGCATTGCCGGGCGCCAGCGTGCCGCCCGGGGCGATGGTGGTGGACGCGGGATCGACGACGCCGGTGCCGCTCAAGGTGCCGC	89	0.0187053683259202	8.92	1.028	-3.117203	F	NA	NA	NA	NA	NA	NA	NA	NA	NA	NA	NA	NA	NA	NA	NA	NA	NA	NA	F	NA	NA	NA	NA	NA	NA	NA	NA	NA	NA	NA	NA	NA	NA	NA	NA	NA	NA	NA
TGCTCATGGTGGTCTTCGCAGTCACGCACAA	29	GCTTGTGCGTGACTGCGAAGACCACCATGAGCATACCCAGCAGCCAAATAGGATCGCGG	59	0.0310636220624459	32.609565	3.076333	-3.406012	F	NA	NA	NA	NA	NA	NA	NA	NA	NA	NA	NA	NA	NA	NA	NA	NA	NA	NA	F	NA	NA	NA	NA	NA	NA	NA	NA	NA	NA	NA	NA	NA	NA	NA	NA	NA	NA	NA
CCGGCGCGGTGCCGGTCCGATGGATGCTTCG	21	GCCGCGTCCGAACAGCGAAGCATCCATCGGACCGGCACCGCGCCGGTTCAC	51	0.00919235951686797	28.998696	1	-4.857916	F	NA	NA	NA	NA	NA	NA	NA	NA	NA	NA	NA	NA	NA	NA	NA	NA	NA	NA	T	chr14:91299076:+|chr9:35153143:-	NA	NA	NA	NA	NA	NA	NA	NA	NA	NA	NA	NA	NA	NA	NA	NA	NA	NA
ATATCAAAGTTCGCAAACTATATATTATATA	4	AAATATCAAAGTTCGCAAACTATATATTATATAC	34	0.0347110164806721	91.19	1	-6.510804	T	6535	chr3	93470731	93470764	NA	34M	0	0	0	1	0	0	F	F	1	0.970588235294118	1	1	F	NA	NA	NA	NA	NA	NA	NA	NA	NA	ENSG00000283544	-	ABBA01000935.2	1956957	ENSG00000251727	+	RNU6-488P	372999	NA	NA
GTACGTGCCGGCAAAGCCGGTATCCCAGCAC	6	GAGCTGTACGTGCCGGCAAAGCCGGTATCCCAGCAC	36	0.0303136655124233	1	8.543667	3.094855	F	NA	NA	NA	NA	NA	NA	NA	NA	NA	NA	NA	NA	NA	NA	NA	NA	NA	NA	F	NA	NA	NA	NA	NA	NA	NA	NA	NA	NA	NA	NA	NA	NA	NA	NA	NA	NA	NA
CCATTCCATCCGCGCGCAGATCCCGCCGATC	9	CCATTCCATCCGCGCGCAGATCCCGCCGATCCATCCGGA	39	0.0443644197873324	12.076957	2.184	-2.467212	F	NA	NA	NA	NA	NA	NA	NA	NA	NA	NA	NA	NA	NA	NA	NA	NA	NA	NA	F	NA	NA	NA	NA	NA	NA	NA	NA	NA	NA	NA	NA	NA	NA	NA	NA	NA	NA	NA
GGTGAGGATGCCGACCTTCTTCTTTTTGGAC	4	GTCCAAAAAGAAGAAGGTCGGCATCCTCACCGCA	34	0.0444797740066076	23.346957	1.219333	-4.25907	T	19371	chr1	220992696	220992712	NA	17S17M	0	0	0	0	0	17	F	T	0.5	1	1	0	F	NA	NA	NA	NA	NA	NA	NA	NA	NA	ENSG00000136630	+	HLX	107638	ENSG00000226211	-	AL445466.1	141152	NA	NA
GGTCCGACCGGCGCCGGCGCGTTCTGCGCCA	28	GCTGGCGCAGAACGCGCCGGCGCCGGTCGGACCGCCGACGACGATCACCAGCCCGCCG	58	0.0438724659211977	39.853478	1	-5.316634	F	NA	NA	NA	NA	NA	NA	NA	NA	NA	NA	NA	NA	NA	NA	NA	NA	NA	NA	F	NA	NA	NA	NA	NA	NA	NA	NA	NA	NA	NA	NA	NA	NA	NA	NA	NA	NA	NA
ATCGAAACCGACAAGGCGACGATGGAGGTCG	8	CCGAGATCGAAACCGACAAGGCGACGATGGAGGTCGAG	38	0.044042548469728	12.156957	1	-3.60371	F	NA	NA	NA	NA	NA	NA	NA	NA	NA	NA	NA	NA	NA	NA	NA	NA	NA	NA	F	NA	NA	NA	NA	NA	NA	NA	NA	NA	NA	NA	NA	NA	NA	NA	NA	NA	NA	NA
CAGTCGGTCCAGCGCGCGGTGGTATCGGCCC	8	CAGCCAGTCGGTCCAGCGCGCGGTGGTATCGGCCCACA	38	0.0145412663215052	46.655652	2.730333	-4.094903	F	NA	NA	NA	NA	NA	NA	NA	NA	NA	NA	NA	NA	NA	NA	NA	NA	NA	NA	F	NA	NA	NA	NA	NA	NA	NA	NA	NA	NA	NA	NA	NA	NA	NA	NA	NA	NA	NA
CCTTTTGAATGCCAGGACCGATTACGAGCAA	3	GCCTTTTGAATGCCAGGACCGATTACGAGCAAA	33	0.0365120448883511	1.04087	7.582667	2.864915	T	12324	chrX	47310588	47310604	NA	16S17M	0	0	0	0	0	16	F	T	0.515151515151515	1	1	0	F	NA	NA	NA	NA	NA	NA	NA	NA	NA	ENSG00000203402	+	AL591503.1	11868	ENSG00000147117	+	ZNF157	59978	NA	NA
ATGGAATGGAATGGAATGGAATGGCTTCAAA	3	GAATGGAATGGAATGGAATGGAATGGCTTCAAA	33	0.0202679513083856	62.29913	1	-5.96114	T	7960	chrY	11528270	11528302	NA	33M	0	0	0	3	0	0	F	F	1	0.909090909090909	1	3	F	NA	NA	NA	NA	NA	NA	NA	NA	NA	ENSG00000271375	-	AC134879.2	54034	ENSG00000234385	-	RCC2P1	252749	NA	NA
CGGCTTGAGCCCCGTTACATTTTCCGCGCAG	2	ACGGCTTGAGCCCCGTTACATTTTCCGCGCAG	32	0.0297487147452266	34.368696	1.98	-4.117523	F	NA	NA	NA	NA	NA	NA	NA	NA	NA	NA	NA	NA	NA	NA	NA	NA	NA	NA	F	NA	NA	NA	NA	NA	NA	NA	NA	NA	NA	NA	NA	NA	NA	NA	NA	NA	NA	NA
CCGATCAGGAATTCATCGAGATCGCGCGCGG	63	AATGCCGACATGACCGCGCGCGATCTCGATGAATTCCTGATCGGTCCACGGCCGCTCGCGATCGTCCTTGGTCAGGCCGATCTGCGTCACGGTCAGCCAG	100	0.00813605426283561	9.634348	1.034333	-3.219486	F	NA	NA	NA	NA	NA	NA	NA	NA	NA	NA	NA	NA	NA	NA	NA	NA	NA	NA	F	NA	NA	NA	NA	NA	NA	NA	NA	NA	NA	NA	NA	NA	NA	NA	NA	NA	NA	NA
AGCGGACGTCGTCGGCGTCGTCGGGCTCCAT	5	CGCATGGAGCCCGACGACGCCGACGACGTCCGCTC	35	0.0336223184108771	65.96087	1	-6.043539	T	4969	chr12	132673164	132673181	NA	17S18M	0	0	0	2	0	17	F	T	0.514285714285714	0.888888888888889	1	2	F	NA	ENSG00000177084	POLE	-	protein_coding	NA	NA	NA	NA	NA	NA	NA	NA	NA	NA	NA	NA	T	F
CGAAGACCGCCGGCGCCAGTTCGCGCAGGCG	19	TCTTCCACCGCCTGCGCGAACTGGCGCCGGCGGTCTTCGTCGAGCCCGC	49	0.0352312934986655	1	8.460333	3.080714	F	NA	NA	NA	NA	NA	NA	NA	NA	NA	NA	NA	NA	NA	NA	NA	NA	NA	NA	F	NA	NA	NA	NA	NA	NA	NA	NA	NA	NA	NA	NA	NA	NA	NA	NA	NA	NA	NA
CCGTCAACGCCGCTTGGGACTGCCGTTCTGC	20	GCAGCCCGCGCGGCGCCGGCAGAACGGCAGTCCCAAGCGGCGTTGACGGC	50	0.0428143902450789	1	7.114	2.830661	F	NA	NA	NA	NA	NA	NA	NA	NA	NA	NA	NA	NA	NA	NA	NA	NA	NA	NA	F	NA	NA	NA	NA	NA	NA	NA	NA	NA	NA	NA	NA	NA	NA	NA	NA	NA	NA	NA
AAGGATGCGGACGCCCCGCTGTTGGCCGACG	12	GCGTCGGCCAACAGCGGGGCGTCCGCATCCTTGGCCGACAGC	42	0.0390773117750593	1.063913	4.927333	2.211427	F	NA	NA	NA	NA	NA	NA	NA	NA	NA	NA	NA	NA	NA	NA	NA	NA	NA	NA	F	NA	NA	NA	NA	NA	NA	NA	NA	NA	NA	NA	NA	NA	NA	NA	NA	NA	NA	NA
AATTATCCCAATATCGTCTCTGAAATGGCGT	35	CAAAGATTGGTGCGCGGAGACGACCAATTATCCCAATATCGTCTCTGAAATGGCGTTAGCGCACA	65	0.00268720918510221	27.410435	1.686333	-4.022764	F	NA	NA	NA	NA	NA	NA	NA	NA	NA	NA	NA	NA	NA	NA	NA	NA	NA	NA	F	NA	NA	NA	NA	NA	NA	NA	NA	NA	NA	NA	NA	NA	NA	NA	NA	NA	NA	NA
GCGGCGGCCGAAGCGGCGCGCTGATTACAAC	3	AAGTTGTAATCAGCGCGCCGCTTCGGCCGCCGC	33	0.0263850756644828	2.361304	9.965	2.077286	T	18259	chr14	61864594	61864610	NA	16S17M	0	0	0	0	0	16	F	T	0.515151515151515	1	1	0	F	NA	ENSG00000139973	SYT16	+	protein_coding	NA	NA	NA	NA	NA	NA	NA	NA	NA	NA	NA	NA	F	T
TACTGCCTCAGGACCGGGCGCAGCCGGGCGA	1	TACTGCCTCAGGACCGGGCGCAGCCGGGCGA	31	0.0440194723912252	10.818696	1	-3.435455	F	NA	NA	NA	NA	NA	NA	NA	NA	NA	NA	NA	NA	NA	NA	NA	NA	NA	NA	F	NA	NA	NA	NA	NA	NA	NA	NA	NA	NA	NA	NA	NA	NA	NA	NA	NA	NA	NA
AGTTGTAGGCGAGCGTCGGCGAGTTGCTGGC	8	GCGGCCAGCAACTCGCCGACGCTCGCCTACAACTCCTT	38	0.0320827663474214	13.876522	2.629667	-2.399694	F	NA	NA	NA	NA	NA	NA	NA	NA	NA	NA	NA	NA	NA	NA	NA	NA	NA	NA	F	NA	NA	NA	NA	NA	NA	NA	NA	NA	NA	NA	NA	NA	NA	NA	NA	NA	NA	NA
GGGAGAGGTTTTGCCGTGGCGGATGACTACC	37	CCGCCGGGACGAGGGAGAGGTTTTGCCGTGGCGGATGACTACCAGGCGCAACGGGCTGCAAACGGCG	67	0.031401992766282	52.853043	3.993333	-3.726321	F	NA	NA	NA	NA	NA	NA	NA	NA	NA	NA	NA	NA	NA	NA	NA	NA	NA	NA	F	NA	NA	NA	NA	NA	NA	NA	NA	NA	NA	NA	NA	NA	NA	NA	NA	NA	NA	NA
CTCTCTGGAACGGGGATGCTTGCATGTGTAA	2	ACTCTCTGGAACGGGGATGCTTGCATGTGTAA	32	0.00939060452599388	1.212174	8.983	2.889601	T	15732	chrM	689	720	NA	32M	0	0	0	1	0	0	F	F	1	0.96875	1	1	F	NA	ENSG00000211459	MT-RNR1	+	Mt_rRNA	NA	NA	NA	NA	NA	NA	NA	NA	NA	NA	NA	NA	T	F
GATTCCGTAAGTAGCGACGAGCGAACGCGGA	7	AGATTCCGTAAGTAGCGACGAGCGAACGCGGACTAGC	37	0.0477950067111918	1.04087	6.887667	2.726226	F	NA	NA	NA	NA	NA	NA	NA	NA	NA	NA	NA	NA	NA	NA	NA	NA	NA	NA	F	NA	NA	NA	NA	NA	NA	NA	NA	NA	NA	NA	NA	NA	NA	NA	NA	NA	NA	NA
ATCGTGGCCGCGGAGAACACCGCCGGCGTCA	22	GACCATGCGCGCGAAGCAACCATCGTGGCCGCGGAGAACACCGCCGGCGTCA	52	0.0460215384825817	40.299565	1.645667	-4.61402	F	NA	NA	NA	NA	NA	NA	NA	NA	NA	NA	NA	NA	NA	NA	NA	NA	NA	NA	F	NA	NA	NA	NA	NA	NA	NA	NA	NA	NA	NA	NA	NA	NA	NA	NA	NA	NA	NA
AGGACGGCGAGATAAAAGGGGCTCGCCGCTC	5	TCGAGCGGCGAGCCCCTTTTATCTCGCCGTCCTGC	35	0.0448284288378651	3.94913	8.241667	1.061401	F	NA	NA	NA	NA	NA	NA	NA	NA	NA	NA	NA	NA	NA	NA	NA	NA	NA	NA	F	NA	NA	NA	NA	NA	NA	NA	NA	NA	NA	NA	NA	NA	NA	NA	NA	NA	NA	NA
ATTCCCGGCAGGCCGCCGTCGATCGTCGAGG	40	TGATTCCCGGCAGGCCGCCGTCGATCGTCGAGGCGCTGTCATACCAGCCGCCGAAACGCCAGGTCCCGTT	70	0.0274359439533295	20.082174	1.870667	-3.424291	F	NA	NA	NA	NA	NA	NA	NA	NA	NA	NA	NA	NA	NA	NA	NA	NA	NA	NA	F	NA	NA	NA	NA	NA	NA	NA	NA	NA	NA	NA	NA	NA	NA	NA	NA	NA	NA	NA
CCTGGTTCTGTATCCACCGCATCTGCAAGCC	19	CGCCCGCGATATCAGTTGCCTGGTTCTGTATCCACCGCATCTGCAAGCC	49	0.0454853251660967	44.151739	1.091	-5.338747	F	NA	NA	NA	NA	NA	NA	NA	NA	NA	NA	NA	NA	NA	NA	NA	NA	NA	NA	F	NA	NA	NA	NA	NA	NA	NA	NA	NA	NA	NA	NA	NA	NA	NA	NA	NA	NA	NA
CCTTCCACGAGCAGGAACCCGTGCAATTCAC	4	GACCTTCCACGAGCAGGAACCCGTGCAATTCACG	34	0.0381200291504216	19.027391	1.689667	-3.493267	F	NA	NA	NA	NA	NA	NA	NA	NA	NA	NA	NA	NA	NA	NA	NA	NA	NA	NA	F	NA	NA	NA	NA	NA	NA	NA	NA	NA	NA	NA	NA	NA	NA	NA	NA	NA	NA	NA
GCGCTGCTGGGCGACGAAGCCGCCGCTGGAA	11	TTCCAGCGGCGGCTTCGTCGCCCAGCAGCGCAATATCGTCC	41	0	1.227826	14.013667	3.512656	F	NA	NA	NA	NA	NA	NA	NA	NA	NA	NA	NA	NA	NA	NA	NA	NA	NA	NA	F	NA	NA	NA	NA	NA	NA	NA	NA	NA	NA	NA	NA	NA	NA	NA	NA	NA	NA	NA
CGCGAAACAATCGGGATCCTCGATCCGGACC	36	ATCGGCGATCGCGAAACAATCGGGATCCTCGATCCGGACCTCGATGTGAATCCGTCCACCGACCAG	66	0.0160690765383585	19.295652	1.042	-4.210849	F	NA	NA	NA	NA	NA	NA	NA	NA	NA	NA	NA	NA	NA	NA	NA	NA	NA	NA	F	NA	NA	NA	NA	NA	NA	NA	NA	NA	NA	NA	NA	NA	NA	NA	NA	NA	NA	NA
GAGAACAACCGCATGTTGCTGATCGCGGGCA	20	CGAGAACAACCGCATGTTGCTGATCGCGGGCAAGCTCGACTTCTTCATGAGCGC	54	0.022081811716769	23.122609	1.027667	-4.491859	F	NA	NA	NA	NA	NA	NA	NA	NA	NA	NA	NA	NA	NA	NA	NA	NA	NA	NA	F	NA	NA	NA	NA	NA	NA	NA	NA	NA	NA	NA	NA	NA	NA	NA	NA	NA	NA	NA
TCCAGAGTGCCTTTGCCACAATTTCGCGCCA	19	TGCGGTGGCGCGAAATTGTGGCAAAGGCACTCTGGACGCAAGTGATAGA	49	0.0369101907555903	1	6.468333	2.693394	F	NA	NA	NA	NA	NA	NA	NA	NA	NA	NA	NA	NA	NA	NA	NA	NA	NA	NA	F	NA	NA	NA	NA	NA	NA	NA	NA	NA	NA	NA	NA	NA	NA	NA	NA	NA	NA	NA
AAAAAATCCACCCCTTACGAGTGCGGCTTCG	26	CTACCACAACTCAACGGCTACATAGAAAAAATCCACCCCTTACGAGTGCGGCTTCG	56	0.0256419728747536	1.485217	8.898	2.582807	T	15	chrM	10128	10182	NA	25M1I30M	1	0	0	0	0	0	F	F	1	0.964285714285714	1	1	F	NA	ENSG00000198840	MT-ND3	+	protein_coding	NA	NA	NA	NA	NA	NA	NA	NA	NA	NA	NA	NA	T	F
ACCACGCTCACCGGCTTCGTCGAAGCGCTCG	30	TCTGTCCCGCTTTTGGAGAATACCACGCTCACCGGCTTCGTCGAAGCGCTCGGAAGCGGC	60	0.00919235951686797	1	8.790667	3.135973	F	NA	NA	NA	NA	NA	NA	NA	NA	NA	NA	NA	NA	NA	NA	NA	NA	NA	NA	F	NA	NA	NA	NA	NA	NA	NA	NA	NA	NA	NA	NA	NA	NA	NA	NA	NA	NA	NA
CTCCAGCGGCGCCCGGATTGTTCGCGAGCCA	11	CCCCGTGACTCCAGCGGCGCCCGGATTGTTCGCGAGCCAGG	41	0.032211850658326	8.52	1	-3.090853	F	NA	NA	NA	NA	NA	NA	NA	NA	NA	NA	NA	NA	NA	NA	NA	NA	NA	NA	F	NA	NA	NA	NA	NA	NA	NA	NA	NA	NA	NA	NA	NA	NA	NA	NA	NA	NA	NA
GCTGCACCGCGGTGGTATCTCGCCAGGAGCC	7	AGCTGCACCGCGGTGGTATCTCGCCAGGAGCCGTCGA	37	0.0388906774154523	2.794783	11.349333	2.021799	F	NA	NA	NA	NA	NA	NA	NA	NA	NA	NA	NA	NA	NA	NA	NA	NA	NA	NA	F	NA	NA	NA	NA	NA	NA	NA	NA	NA	NA	NA	NA	NA	NA	NA	NA	NA	NA	NA
AGGTGATGTTGACCGGGATCGGCGTCGGGAA	2	AGGTGATGTTGACCGGGATCGGCGTCGGGAAT	32	0.0396459523263883	25.835217	1	-4.691267	T	5938	chr13	67032457	67032473	NA	15S17M	0	0	0	2	0	15	F	T	0.53125	0.882352941176471	1	2	F	NA	ENSG00000184226	PCDH9	-	protein_coding	NA	NA	NA	NA	NA	NA	NA	NA	NA	NA	NA	NA	F	T
CAAAGGTGCCGTTGATGTCGGCGATGCGCAC	38	CGCGCTCGCCGTGCGCATCGCCGACATCAACGGCACCTTTGCGACCAGCAGCGTACCGAGAGCCCGCG	68	0.0111507583001328	9.511739	1.061333	-3.163832	F	NA	NA	NA	NA	NA	NA	NA	NA	NA	NA	NA	NA	NA	NA	NA	NA	NA	NA	F	NA	NA	NA	NA	NA	NA	NA	NA	NA	NA	NA	NA	NA	NA	NA	NA	NA	NA	NA
AATAATCCTTCTAATAGCTATCCTCTTCAAC	13	TACTCATCATTAATAATCCTTCTAATAGCTATCCTCTTCAACAATATACTCCCC	54	0.0331523121681577	2.133043	8.582	2.008401	T	1286	chr1	629841	629882	NA	12S42M	0	0	0	1	0	12	F	T	0.777777777777778	0.976190476190476	2	1	F	NA	ENSG00000225630	MTND2P28	+	unprocessed_pseudogene	NA	NA	NA	NA	NA	NA	NA	NA	NA	NA	NA	NA	T	F
ACCGGCCCGGTGCAGATATGCACGCCGAGGC	20	CGGCGAAGGCCTCGGCGTGCATATCTGCACCGGGCCGGTGTTCGTGCGCG	50	0.0251790717201166	25.380435	1.766667	-3.844615	F	NA	NA	NA	NA	NA	NA	NA	NA	NA	NA	NA	NA	NA	NA	NA	NA	NA	NA	F	NA	NA	NA	NA	NA	NA	NA	NA	NA	NA	NA	NA	NA	NA	NA	NA	NA	NA	NA
ATCGCCAGCGCCTGATCGGTCGACAGCGCAG	10	CATCGCCAGCGCCTGATCGGTCGACAGCGCAGCTATCACG	40	0.0367635276817846	21.206087	1.014	-4.386349	F	NA	NA	NA	NA	NA	NA	NA	NA	NA	NA	NA	NA	NA	NA	NA	NA	NA	NA	F	NA	NA	NA	NA	NA	NA	NA	NA	NA	NA	NA	NA	NA	NA	NA	NA	NA	NA	NA
AGTTCGCCTTGCCACGCGAGATGACGCAAGC	39	TGGAGTTCGCCTTGCCACGCGAGATGACGCAAGCACAGGGCATCGAACTGGCCCGCGACTTCGTGCAGT	69	0.0203838112821823	39.872174	3.364667	-3.566847	F	NA	NA	NA	NA	NA	NA	NA	NA	NA	NA	NA	NA	NA	NA	NA	NA	NA	NA	F	NA	NA	NA	NA	NA	NA	NA	NA	NA	NA	NA	NA	NA	NA	NA	NA	NA	NA	NA
ATCCAGTGCGAGGCCGACCAGGCCCAGAAGC	1	ATCCAGTGCGAGGCCGACCAGGCCCAGAAGC	31	0.0421294205499794	1.283913	11.305333	3.138384	F	NA	NA	NA	NA	NA	NA	NA	NA	NA	NA	NA	NA	NA	NA	NA	NA	NA	NA	F	NA	NA	NA	NA	NA	NA	NA	NA	NA	NA	NA	NA	NA	NA	NA	NA	NA	NA	NA
CGACCGTCTCCTACGAAGTCGGCGTGGCGCC	8	GAACGGCGACCGTCTCCTACGAAGTCGGCGTGGCGCCC	38	0.0421294205499794	66.308261	1.2	-5.788082	F	NA	NA	NA	NA	NA	NA	NA	NA	NA	NA	NA	NA	NA	NA	NA	NA	NA	NA	F	NA	NA	NA	NA	NA	NA	NA	NA	NA	NA	NA	NA	NA	NA	NA	NA	NA	NA	NA
CCTCCCTTAGTGCGCGACGGCGGCAGCAGCC	34	CGTTCCATCTCGCAATAAGGGCAACGGATTAAAAGCATATCATACCTCCCTTAGTGCGCGACGGCGGCAGCAGCCG	76	0.0358301649129806	11.18087	1	-3.482961	F	NA	NA	NA	NA	NA	NA	NA	NA	NA	NA	NA	NA	NA	NA	NA	NA	NA	NA	F	NA	NA	NA	NA	NA	NA	NA	NA	NA	NA	NA	NA	NA	NA	NA	NA	NA	NA	NA
AGCCGACCAGCGCCACCACGCGGTAGGGCAC	6	GTAGCCGACCAGCGCCACCACGCGGTAGGGCACGCG	36	0.0411571843749679	1	7.267333	2.861426	T	4750	chr1	156077424	156077452	NA	7S29M	0	0	0	2	0	7	F	T	0.805555555555556	0.931034482758621	1	2	F	NA	ENSG00000254726	MEX3A	-	protein_coding	NA	NA	NA	NA	NA	NA	NA	NA	NA	NA	NA	NA	T	F
GCAAAATCACGGCTGCCATAGTCGGTGTCGC	20	GCGACACCGACTATGGCAGCCGTGATTTTGCCTGCCGTGATCCGGAAGGA	50	0.0279047458128578	1	9.407	3.233735	F	NA	NA	NA	NA	NA	NA	NA	NA	NA	NA	NA	NA	NA	NA	NA	NA	NA	NA	T	chr12:116278323:-|chr8:124247375:+	NA	NA	NA	NA	NA	NA	NA	NA	NA	NA	NA	NA	NA	NA	NA	NA	NA	NA
ACGTGAACAGGATCTTGCGGCGAAGATCCGG	20	CAGGATGAACAACGTGAACAGGATCTTGCGGCGAAGATCCGGTGTTCGGA	50	0.0360094868722837	81.156522	1.055667	-6.26448	F	NA	NA	NA	NA	NA	NA	NA	NA	NA	NA	NA	NA	NA	NA	NA	NA	NA	NA	F	NA	NA	NA	NA	NA	NA	NA	NA	NA	NA	NA	NA	NA	NA	NA	NA	NA	NA	NA
CTTTTTGTTCGACTCTTAACGGAGTGTCAAC	1	CTTTTTGTTCGACTCTTAACGGAGTGTCAAC	31	0.0399578521219876	9.736522	1.784667	-2.447752	F	NA	NA	NA	NA	NA	NA	NA	NA	NA	NA	NA	NA	NA	NA	NA	NA	NA	NA	F	NA	NA	NA	NA	NA	NA	NA	NA	NA	NA	NA	NA	NA	NA	NA	NA	NA	NA	NA
CATCGCCGATGGTGGTAGCGTAACCGAGCCG	11	CGGTGACGCCATCGCCGATGGTGGTAGCGTAACCGAGCCGG	41	0.0102635057903666	15.121739	4.861	-1.637299	F	NA	NA	NA	NA	NA	NA	NA	NA	NA	NA	NA	NA	NA	NA	NA	NA	NA	NA	F	NA	NA	NA	NA	NA	NA	NA	NA	NA	NA	NA	NA	NA	NA	NA	NA	NA	NA	NA
TCGCTTCAAAGCCTACCACCTATCCTACACA	5	GCCCTCGCTTCAAAGCCTACCACCTATCCTACACA	35	0.0370764721292937	5.204783	26.944667	2.37209	T	20387	chr11	7058783	7058802	NA	11S20M4S	0	0	0	0	4	11	T	T	0.571428571428571	1	1	0	F	NA	ENSG00000158077	NLRP14	+	protein_coding	NA	NA	NA	NA	NA	NA	NA	NA	NA	NA	NA	NA	F	T
AGCCGGATCTGCGCGCCCGCATCCAGCCGGG	22	AAGCTGATCACCCGGCACAAGCCGGATCTGCGCGCCCGCATCCAGCCGGGCG	52	0.0288526947548136	17.568696	1	-4.134935	F	NA	NA	NA	NA	NA	NA	NA	NA	NA	NA	NA	NA	NA	NA	NA	NA	NA	NA	F	NA	NA	NA	NA	NA	NA	NA	NA	NA	NA	NA	NA	NA	NA	NA	NA	NA	NA	NA
AGCAGGTCCGCTAGCCGGGTAAGACTGGCCG	35	TTCCTGCGATCCTCACGCGGGACGGCCAGTCTTACCCGGCTAGCGGACCTGCTGAGATTGGACGT	65	0.0295425843761919	45.567826	1	-5.509944	F	NA	NA	NA	NA	NA	NA	NA	NA	NA	NA	NA	NA	NA	NA	NA	NA	NA	NA	F	NA	NA	NA	NA	NA	NA	NA	NA	NA	NA	NA	NA	NA	NA	NA	NA	NA	NA	NA
ATCGGGCAGGTACGCCGTCTCGTGCGGACGC	9	AAGGCTGCGTCCGCACGAGACGGCGTACCTGCCCGATGA	39	0.0401347450572431	9.197391	2.832667	-1.699064	F	NA	NA	NA	NA	NA	NA	NA	NA	NA	NA	NA	NA	NA	NA	NA	NA	NA	NA	F	NA	NA	NA	NA	NA	NA	NA	NA	NA	NA	NA	NA	NA	NA	NA	NA	NA	NA	NA
CCGACATCGAGACCTCCGTGCTCGGCCACGA	16	GGCCCACAAGATCGTCGCCGACATCGAGACCTCCGTGCTCGGCCACGAAC	50	0.0310416303608351	23.100435	1	-4.529848	F	NA	NA	NA	NA	NA	NA	NA	NA	NA	NA	NA	NA	NA	NA	NA	NA	NA	NA	F	NA	NA	NA	NA	NA	NA	NA	NA	NA	NA	NA	NA	NA	NA	NA	NA	NA	NA	NA
AGGCTGTGCAGCTTACGCTTCTCGGCGACCG	6	CCGACGGTCGCCGAGAAGCGTAAGCTGCACAGCCTG	36	0.0425011744484476	1	7.132333	2.834374	F	NA	NA	NA	NA	NA	NA	NA	NA	NA	NA	NA	NA	NA	NA	NA	NA	NA	NA	F	NA	NA	NA	NA	NA	NA	NA	NA	NA	NA	NA	NA	NA	NA	NA	NA	NA	NA	NA
CGAACAAATACGGGTAGAGGATGGGAACGTC	1	CGAACAAATACGGGTAGAGGATGGGAACGTC	31	0.0300651659303328	12.664348	2.302	-2.459813	T	12474	chr7	41750502	41750518	NA	5S17M9S	0	0	0	0	9	5	T	T	0.548387096774194	1	1	0	F	NA	ENSG00000224116	INHBA-AS1	+	lncRNA	NA	NA	NA	NA	NA	NA	NA	NA	NA	NA	NA	NA	F	T
CGGTGATGACGTCCTGCGGATAGAGCGCGGC	16	GCGGCTCGCCGCGCTCTATCCGCAGGACGTCATCACCGCGTCGGTG	46	0.0272355436241611	51.463478	1.048667	-5.61692	F	NA	NA	NA	NA	NA	NA	NA	NA	NA	NA	NA	NA	NA	NA	NA	NA	NA	NA	F	NA	NA	NA	NA	NA	NA	NA	NA	NA	NA	NA	NA	NA	NA	NA	NA	NA	NA	NA
CATTGGGACGGATGGCATCGCCCGGCGCAAA	17	CGCTTCACCGACTTTGCGCCGGGCGATGCCATCCGTCCCAATGACATCCTGCTGTT	56	0.028448381425748	44.71913	2.088	-4.420699	F	NA	NA	NA	NA	NA	NA	NA	NA	NA	NA	NA	NA	NA	NA	NA	NA	NA	NA	F	NA	NA	NA	NA	NA	NA	NA	NA	NA	NA	NA	NA	NA	NA	NA	NA	NA	NA	NA
GATATATATTCTATAGTGTACTTAAAATATC	3	AGATATATATTCTATAGTGTACTTAAAATATCA	33	0.028072886377526	50.59	1	-5.66078	T	17018	chr6	84583431	84583455	NA	25M8S	0	0	0	2	8	0	T	F	0.757575757575758	0.92	1	2	F	NA	NA	NA	NA	NA	NA	NA	NA	NA	ENSG00000231776	-	LINC01611	27280	ENSG00000112837	-	TBX18	103895	NA	NA
GTAATACGGAGGAGGCAAGCGTTATCCGGAA	1	GTAATACGGAGGAGGCAAGCGTTATCCGGAA	31	0.0397159985398795	6.394783	1	-2.676895	T	19417	chr19	18590053	18590068	NA	15S16M	0	0	0	1	0	15	F	T	0.516129032258065	0.9375	1	1	F	NA	ENSG00000006015	REX1BD	+	protein_coding	NA	NA	NA	NA	NA	NA	NA	NA	NA	NA	NA	NA	T	F
ATTGGGTGCCGCGCGAGGGCATCAGCCGCGA	2	GTCGCGGCTGATGCCCTCGCGCGGCACCCAAT	32	0.0314587727499407	37.36087	1	-5.223456	F	NA	NA	NA	NA	NA	NA	NA	NA	NA	NA	NA	NA	NA	NA	NA	NA	NA	NA	F	NA	NA	NA	NA	NA	NA	NA	NA	NA	NA	NA	NA	NA	NA	NA	NA	NA	NA	NA
AATGGAATGGAAACAACACGAGTGCAATGTA	3	ATGGAATGGAATGGAATGGAAACAACACGAGTGCAATGTA	40	0.0380747049781461	407.598261	7.476667	-5.768609	T	1594	chr4	49644487	49644526	NA	40M	0	0	0	3	0	0	F	F	1	0.925	2	3	F	NA	NA	NA	NA	NA	NA	NA	NA	NA	ENSG00000249337	+	SNX18P25	54959	ENSG00000109184	+	DCUN1D4	2198473	NA	NA
CGACAGGTTCACCGCGACTTGCAGCGGAACC	8	GGCGACAGGTTCACCGCGACTTGCAGCGGAACCGTCCA	38	0.0398817638838437	31.042174	1	-4.956158	F	NA	NA	NA	NA	NA	NA	NA	NA	NA	NA	NA	NA	NA	NA	NA	NA	NA	NA	F	NA	NA	NA	NA	NA	NA	NA	NA	NA	NA	NA	NA	NA	NA	NA	NA	NA	NA	NA
CCGGCAGTCTGTTCTCTGTGGCACTTTCCCG	67	GGTGGGGTTTGCCATGCCGTCACCGTCACCGATGACGCGGTGGGCACTTACTCCACCGTTTCACCCTCACCGGCTCGAAACCGGCAGTCTGTTCTCTGTGGCACTTTCCCG	111	0.0156935021882342	76.157391	1.055667	-6.172757	F	NA	NA	NA	NA	NA	NA	NA	NA	NA	NA	NA	NA	NA	NA	NA	NA	NA	NA	F	NA	NA	NA	NA	NA	NA	NA	NA	NA	NA	NA	NA	NA	NA	NA	NA	NA	NA	NA
AGAGCATGAGATAGGCCGCGAATATCACGAA	9	ATGCAGAGCATGAGATAGGCCGCGAATATCACGAACAGC	39	0.0262985487957425	69.645217	2.696333	-4.690954	F	NA	NA	NA	NA	NA	NA	NA	NA	NA	NA	NA	NA	NA	NA	NA	NA	NA	NA	F	NA	NA	NA	NA	NA	NA	NA	NA	NA	NA	NA	NA	NA	NA	NA	NA	NA	NA	NA
ATCTCCCGAAGACGATCAGCGAGGTGCGCCC	3	TGATCTCCCGAAGACGATCAGCGAGGTGCGCCC	33	0.0491056928998009	1.36087	10.296333	2.919529	F	NA	NA	NA	NA	NA	NA	NA	NA	NA	NA	NA	NA	NA	NA	NA	NA	NA	NA	F	NA	NA	NA	NA	NA	NA	NA	NA	NA	NA	NA	NA	NA	NA	NA	NA	NA	NA	NA
CGATGCCGACGGCGTCGGTTTCGGTGGCCAG	40	CCGAGATTGCCCCACTGGCCACCGAAACCGACGCCGTCGGCATCGACCGCTATCGACTGGCCTCCCGCCA	70	0.0213839785343965	90.43913	1	-6.498875	F	NA	NA	NA	NA	NA	NA	NA	NA	NA	NA	NA	NA	NA	NA	NA	NA	NA	NA	F	NA	NA	NA	NA	NA	NA	NA	NA	NA	NA	NA	NA	NA	NA	NA	NA	NA	NA	NA
CACGCCAAAATGTTAAGTGAGGTTCTGAGGG	4	CCACGCCAAAATGTTAAGTGAGGTTCTGAGGGTG	34	0.0137694389498578	27.61	6.328	-2.125369	T	8924	chr17	64360150	64360183	NA	34M	0	0	0	1	0	0	F	F	1	0.970588235294118	1	1	F	NA	ENSG00000261371	PECAM1	-	protein_coding	NA	NA	NA	NA	NA	NA	NA	NA	NA	NA	NA	NA	T	F
GCGGCCTGATCCGCCTGACCTTGTCGCAGCC	29	GCGGCCTGATCCGCCTGACCTTGTCGCAGCCCGCGATGATCGAGCGGATGCGCAAGACC	59	0.0311249077877692	32.083478	1	-5.003759	F	NA	NA	NA	NA	NA	NA	NA	NA	NA	NA	NA	NA	NA	NA	NA	NA	NA	NA	F	NA	NA	NA	NA	NA	NA	NA	NA	NA	NA	NA	NA	NA	NA	NA	NA	NA	NA	NA
ATCGGCGCGCGTCGGCGAACCGGCCTTAAGC	22	GTCGACATCGGCGCGCGTCGGCGAACCGGCCTTAAGCCGAACGACCCAGTCA	52	0.0364384675087524	1	4.305667	2.106237	F	NA	NA	NA	NA	NA	NA	NA	NA	NA	NA	NA	NA	NA	NA	NA	NA	NA	NA	F	NA	NA	NA	NA	NA	NA	NA	NA	NA	NA	NA	NA	NA	NA	NA	NA	NA	NA	NA
CTTCATCCAATATGTCCTGACCCGGACCGGA	10	GCGGGTCCGGTCCGGGTCAGGACATATTGGATGAAGGCCG	40	0.0356611031647553	35.912609	3.058	-3.55383	F	NA	NA	NA	NA	NA	NA	NA	NA	NA	NA	NA	NA	NA	NA	NA	NA	NA	NA	F	NA	NA	NA	NA	NA	NA	NA	NA	NA	NA	NA	NA	NA	NA	NA	NA	NA	NA	NA
CGATCGCCTCGGCACAGGCCGCCTCGACAGC	4	GGCGATCGCCTCGGCACAGGCCGCCTCGACAGCG	34	0.023453969273743	1.995217	11.970333	2.584846	T	13351	chr14	54441023	54441039	NA	10S17M7S	0	0	0	0	7	10	T	T	0.5	1	1	0	F	NA	ENSG00000100528	CNIH1	-	protein_coding	NA	NA	NA	NA	NA	NA	NA	NA	NA	NA	NA	NA	F	T
AACGCCGCCGGGTGCACGCAATTTTGGATTG	11	CATGAAACCAATCCAAAATTGCGTGCACCCGGCGGCGTTGT	41	0.0491207165157409	18.270435	1	-4.191439	F	NA	NA	NA	NA	NA	NA	NA	NA	NA	NA	NA	NA	NA	NA	NA	NA	NA	NA	F	NA	NA	NA	NA	NA	NA	NA	NA	NA	NA	NA	NA	NA	NA	NA	NA	NA	NA	NA
ATGGAATGGTATGGAATTGAATCAACTGGAA	15	GAATGGAATCTTCCGGAATGGAATGGAATGAAATGGAATGGTATGGAATTGAATCAACTGGAAT	64	0.0346474704443217	83.642609	1	-6.386166	T	7970	chr17	21970614	21970663	NA	14S50M	0	0	0	3	0	14	F	T	0.78125	0.94	2	3	F	NA	NA	NA	NA	NA	NA	NA	NA	NA	ENSG00000283566	-	AC243725.1	187150	ENSG00000265233	-	ABBA01006766.1	85923	NA	NA
ACGGGGTCTCGATGAGGAGGTCGCCGAGGCG	17	GCACCCAGCCGGACGGGGTCTCGATGAGGAGGTCGCCGAGGCGCTGG	47	0.0431254229927894	24.215652	1.770667	-3.773575	F	NA	NA	NA	NA	NA	NA	NA	NA	NA	NA	NA	NA	NA	NA	NA	NA	NA	NA	F	NA	NA	NA	NA	NA	NA	NA	NA	NA	NA	NA	NA	NA	NA	NA	NA	NA	NA	NA
CGAAGATCACGCTGGAGGGATAGCGCCCGAG	2	ACGAAGATCACGCTGGAGGGATAGCGCCCGAG	32	0.0421871197858842	3.064348	9.487	1.630372	F	NA	NA	NA	NA	NA	NA	NA	NA	NA	NA	NA	NA	NA	NA	NA	NA	NA	NA	F	NA	NA	NA	NA	NA	NA	NA	NA	NA	NA	NA	NA	NA	NA	NA	NA	NA	NA	NA
ATCGCGTATGATCCAATCCGTGCTGATGCTG	16	CCAGCATCAGCACGGATTGGATCATACGCGATGTGGCGGGATAGTG	46	0.0347110164806721	6.117391	1	-2.612916	F	NA	NA	NA	NA	NA	NA	NA	NA	NA	NA	NA	NA	NA	NA	NA	NA	NA	NA	F	NA	NA	NA	NA	NA	NA	NA	NA	NA	NA	NA	NA	NA	NA	NA	NA	NA	NA	NA
CCAAAGGAGATCGTGGCGAAGCTCAACACCG	5	CACGCCAAAGGAGATCGTGGCGAAGCTCAACACCG	35	0.049040091370479	1	6.525	2.705978	F	NA	NA	NA	NA	NA	NA	NA	NA	NA	NA	NA	NA	NA	NA	NA	NA	NA	NA	F	NA	NA	NA	NA	NA	NA	NA	NA	NA	NA	NA	NA	NA	NA	NA	NA	NA	NA	NA
GATCCGGAGATTTCCGAATGGGGAAACCCAA	1	GATCCGGAGATTTCCGAATGGGGAAACCCAA	31	0.0295101092894186	50.355652	1.634667	-4.945085	T	17050	chr8	62743803	62743818	NA	15S16M	0	0	0	0	0	15	F	T	0.516129032258065	1	1	0	F	NA	ENSG00000185942	NKAIN3	+	protein_coding	NA	NA	NA	NA	NA	NA	NA	NA	NA	NA	NA	NA	F	T
ATCTGGTCGGCGACCGCCTTGTCGATGACGG	53	CGCGCCTCGACTACGGAAATCTGGTCGGCGACCGCCTTGTCGATGACGGGCTTGACCTGGGCCGGCACGCTGATGCGGACGCC	83	0.00436579799818016	1	12.585667	3.65371	F	NA	NA	NA	NA	NA	NA	NA	NA	NA	NA	NA	NA	NA	NA	NA	NA	NA	NA	F	NA	NA	NA	NA	NA	NA	NA	NA	NA	NA	NA	NA	NA	NA	NA	NA	NA	NA	NA
AGCTCATGGCATTCGGCATCGGTGAGCCCGC	9	CCACCAGCTCATGGCATTCGGCATCGGTGAGCCCGCCGG	39	0.0305566514518192	11.904348	1.260667	-3.239229	F	NA	NA	NA	NA	NA	NA	NA	NA	NA	NA	NA	NA	NA	NA	NA	NA	NA	NA	F	NA	NA	NA	NA	NA	NA	NA	NA	NA	NA	NA	NA	NA	NA	NA	NA	NA	NA	NA
CAGACCAGTATCCAAATCGAGGATCCGGCCG	1	CAGACCAGTATCCAAATCGAGGATCCGGCCG	31	0.0477429628679723	10.676957	3.13	-1.770266	T	9062	KN196481.1	32905	32922	NA	18M13S	0	0	0	0	13	0	T	F	0.580645161290323	1	1	0	F	NA	NA	NA	NA	NA	NA	NA	NA	NA	NA	NA	NA	NA	NA	NA	NA	NA	NA	NA
CCGTGAAACACCTGGTCGGTGTATTCCGGCA	1	CCGTGAAACACCTGGTCGGTGTATTCCGGCA	31	0.0234888364677242	3.315652	12.554333	1.920821	T	11622	chr11	59155125	59155140	NA	16M15S	0	0	0	0	15	0	T	F	0.516129032258065	1	2	0	F	NA	NA	NA	NA	NA	NA	NA	NA	NA	ENSG00000166801	+	FAM111A	87	ENSG00000110042	+	DTX4	16289	NA	NA
CAGTTGCACCGAATCCGTCGGCTCCTATCTC	3	CGAGATAGGAGCCGACGGATTCGGTGCAACTGA	33	0.0302558132615645	49.27913	1.488	-5.04953	F	NA	NA	NA	NA	NA	NA	NA	NA	NA	NA	NA	NA	NA	NA	NA	NA	NA	NA	F	NA	NA	NA	NA	NA	NA	NA	NA	NA	NA	NA	NA	NA	NA	NA	NA	NA	NA	NA
CGCCACGCAGGGAGCGTTGCGTCCTATGAAC	32	TGGTCGTTCATAGGACGCAACGCTCCCTGCGTGGCGGCCCGACCATCGCTTGACCTGTCGCC	62	0.031543780377862	25.241739	2.426	-3.37916	F	NA	NA	NA	NA	NA	NA	NA	NA	NA	NA	NA	NA	NA	NA	NA	NA	NA	NA	F	NA	NA	NA	NA	NA	NA	NA	NA	NA	NA	NA	NA	NA	NA	NA	NA	NA	NA	NA
ACCGGGCCGGTTCGACCGGATGGAACCCGGG	55	AGCAACAGCGCCCGGGTTCCATCCGGTCGAACCGGCCCGGTTCCTGCCGCACCGCCCTACCTTCGGGCCCGCCGGCGGGCCAGCT	85	0	16.019565	1.665333	-3.265952	F	NA	NA	NA	NA	NA	NA	NA	NA	NA	NA	NA	NA	NA	NA	NA	NA	NA	NA	F	NA	NA	NA	NA	NA	NA	NA	NA	NA	NA	NA	NA	NA	NA	NA	NA	NA	NA	NA
GAATGGAATGGAATGGAATGGAATGTTATCA	4	TTGATAACATTCCATTCCATTCCATTCCATTCCACT	36	0.0461731326209931	157.77	1	-7.301679	T	16583	chr4	49637458	49637493	NA	36M	0	0	0	4	0	0	F	F	1	0.888888888888889	1	4	F	NA	NA	NA	NA	NA	NA	NA	NA	NA	ENSG00000249337	+	SNX18P25	47930	ENSG00000109184	+	DCUN1D4	2205506	NA	NA
GTTCTCCCTCTACATATTTACCACAACACAA	24	AACGTGGTTACTAGCACAGAGAGTTCTCCCTCTACATATTTACCACAACACAAT	54	0.00268720918510221	14.805217	1.055667	-3.809879	T	19850	chrM	11886	11916	NA	23H31M	0	0	0	0	0	23	F	T	1	1	2	0	F	NA	ENSG00000198886	MT-ND4	+	protein_coding	NA	NA	NA	NA	NA	NA	NA	NA	NA	NA	NA	NA	T	F
CCTCGATCATGTCGCATCCGGACCAGGTCGC	14	CAGTACGACACCTCGATCATGTCGCATCCGGACCAGGTCGCAGC	44	0.0327969969603025	1	5.625	2.491853	F	NA	NA	NA	NA	NA	NA	NA	NA	NA	NA	NA	NA	NA	NA	NA	NA	NA	NA	F	NA	NA	NA	NA	NA	NA	NA	NA	NA	NA	NA	NA	NA	NA	NA	NA	NA	NA	NA
ATCAGGCTGGCCGAGCCTTGCAGCGCGGTGG	2	GATCAGGCTGGCCGAGCCTTGCAGCGCGGTGG	32	0.0183157116429306	25.476087	1	-4.671072	T	6746	chr8	20253912	20253928	NA	17M15S	0	0	0	1	15	0	T	F	0.53125	0.941176470588235	1	1	F	NA	ENSG00000061337	LZTS1	-	protein_coding	NA	NA	NA	NA	NA	NA	NA	NA	NA	NA	NA	NA	F	T
ACCATCGAGAGGCGAGGCCCGACCGGAAATC	3	ACCATCGAGAGGCGAGGCCCGACCGGAAATCGG	33	0.0493821950484192	1	4.539333	2.18248	T	2289	chr18	71393681	71393697	NA	17M16S	0	0	0	2	16	0	T	F	0.515151515151515	0.882352941176471	1	2	F	NA	NA	NA	NA	NA	NA	NA	NA	NA	ENSG00000265484	-	AC091691.2	156524	ENSG00000260676	-	LINC01541	126264	NA	NA
ATCTCGTTGCGTCGGTCGCGCCCTCCCGAGG	4	GCCTCGGGAGGGCGCGACCGACGCAACGAGATGG	34	0.0441780871979904	1.544783	12.193333	2.980616	T	7416	chr2	27409521	27409537	NA	10S17M7S	0	0	0	1	7	10	T	T	0.5	0.941176470588235	1	1	F	NA	ENSG00000115241	PPM1G	-	protein_coding	NA	NA	NA	NA	NA	NA	NA	NA	NA	NA	NA	NA	T	F
CGAAGGCGCTCCGAAGCCGGTCAAGGAAGGC	12	ACCTCGTCGAAGGCGCTCCGAAGCCGGTCAAGGAAGGCGTCA	42	0.0429894820515766	1.129565	7.437	2.718953	F	NA	NA	NA	NA	NA	NA	NA	NA	NA	NA	NA	NA	NA	NA	NA	NA	NA	NA	F	NA	NA	NA	NA	NA	NA	NA	NA	NA	NA	NA	NA	NA	NA	NA	NA	NA	NA	NA
ATCCGGTTGACGACGCGCGCAAGCAAGCCCG	21	GACGAAGCGGGCTTGCTTGCGCGCGTCGTCAACCGGATTGAATGGTACGAC	51	0.0158680231957595	1	7.853	2.973244	F	NA	NA	NA	NA	NA	NA	NA	NA	NA	NA	NA	NA	NA	NA	NA	NA	NA	NA	F	NA	NA	NA	NA	NA	NA	NA	NA	NA	NA	NA	NA	NA	NA	NA	NA	NA	NA	NA
ATGGCATTAGGATTATCGACAATTTCCTGTG	11	TTATGGCATTAGGATTATCGACAATTTCCTGTGTCGCAGCCATCGAA	47	0.0495873644410363	32.172174	1	-5.007742	F	NA	NA	NA	NA	NA	NA	NA	NA	NA	NA	NA	NA	NA	NA	NA	NA	NA	NA	F	NA	NA	NA	NA	NA	NA	NA	NA	NA	NA	NA	NA	NA	NA	NA	NA	NA	NA	NA
ACGCCGAACGGCTGGACGGTGCTGCCCGGCG	49	GGCCGGATCACGCCGCGGCCCTTCGTGCTCAGGGTGTTCGCTGCGGCGACGCCGAACGGCTGGACGGTGCTGCCCGGCG	79	0.0155844666140782	18.474783	1	-4.207486	F	NA	NA	NA	NA	NA	NA	NA	NA	NA	NA	NA	NA	NA	NA	NA	NA	NA	NA	F	NA	NA	NA	NA	NA	NA	NA	NA	NA	NA	NA	NA	NA	NA	NA	NA	NA	NA	NA
CTTCTGCTTCGCTCAGCGCTTCAGCCGGGAA	1	CTTCTGCTTCGCTCAGCGCTTCAGCCGGGAA	31	0.0449414551061306	6.944348	1	-2.795839	T	16104	chr11	55521160	55521175	NA	16M15S	0	0	0	0	15	0	T	F	0.516129032258065	1	1	0	F	NA	NA	NA	NA	NA	NA	NA	NA	NA	ENSG00000254576	+	OR4C1P	9992	ENSG00000233301	+	OR4C14P	15826	NA	NA
AAGCAGACCCTGCTGACGATCTCGGTCACCG	55	AAGCAGACCCTGCTGACGATCTCGGTCACCGAGGACGAGATCGACGGCATCGGCGGCGACAACATCGCCGGCGCCTATTCCTGCA	85	0.0435256092273198	8.440435	1	-3.077317	F	NA	NA	NA	NA	NA	NA	NA	NA	NA	NA	NA	NA	NA	NA	NA	NA	NA	NA	F	NA	NA	NA	NA	NA	NA	NA	NA	NA	NA	NA	NA	NA	NA	NA	NA	NA	NA	NA
AGTCATGAGACACGGCTCTGCTTCTGCCCTA	14	AAGCGAATAGGGCAGAAGCAGAGCCGTGTCTCATGACTGAACCC	44	0.028703341942535	1	11.222	3.488258	F	NA	NA	NA	NA	NA	NA	NA	NA	NA	NA	NA	NA	NA	NA	NA	NA	NA	NA	F	NA	NA	NA	NA	NA	NA	NA	NA	NA	NA	NA	NA	NA	NA	NA	NA	NA	NA	NA
AGCGAGCACGACCTCGATCTCAGAGGTGCGG	22	CTCGGACAGCAGATCGCCCGCACCTCTGAGATCGAGGTCGTGCTCGCTGATC	52	0.0127341652434803	42.538261	1.417667	-4.90717	F	NA	NA	NA	NA	NA	NA	NA	NA	NA	NA	NA	NA	NA	NA	NA	NA	NA	NA	F	NA	NA	NA	NA	NA	NA	NA	NA	NA	NA	NA	NA	NA	NA	NA	NA	NA	NA	NA
GACTGCTCGGCATCTTCCTGGCGCTGAAATA	20	GTCGATATATTTCAGCGCCAGGAAGATGCCGAGCAGTCCGATCGGGATGT	50	0.0165199466322359	1	6.649	2.733137	F	NA	NA	NA	NA	NA	NA	NA	NA	NA	NA	NA	NA	NA	NA	NA	NA	NA	NA	F	NA	NA	NA	NA	NA	NA	NA	NA	NA	NA	NA	NA	NA	NA	NA	NA	NA	NA	NA
ATGGAATGGAAGGGAATGGAATATAATCAAC	51	GTGTGGAATGGAATGGAATGGAAGGGAATGGAATATAATCAACCCGAATGGAATGGAATGTAATGGAGAGAAAGGGAGTTGAATAGAATCAATCCGAATGTAAAGGA	107	0.0151883158828749	81.495217	1	-6.348643	T	8035	chr4	49639050	49639109	NA	60M47S	0	0	0	7	47	0	T	F	0.560747663551402	0.883333333333333	1	7	F	NA	NA	NA	NA	NA	NA	NA	NA	NA	ENSG00000249337	+	SNX18P25	49522	ENSG00000109184	+	DCUN1D4	2203890	NA	NA
GGGTAAGGTTCGGATCGGCGCTTTCATCAAC	22	GCAGCCGGGTAAGGTTCGGATCGGCGCTTTCATCAACCGTGGTTACACCGGC	52	0.00268720918510221	56.842609	1.455333	-5.287552	F	NA	NA	NA	NA	NA	NA	NA	NA	NA	NA	NA	NA	NA	NA	NA	NA	NA	NA	F	NA	NA	NA	NA	NA	NA	NA	NA	NA	NA	NA	NA	NA	NA	NA	NA	NA	NA	NA
GTGCCTCTCTTCGTCGGCCGCGAGAAATCGA	4	TCGATTTCTCGCGGCCGACGAAGAGAGGCACGAT	34	0.0273789677910221	30.666522	1.672667	-4.196442	F	NA	NA	NA	NA	NA	NA	NA	NA	NA	NA	NA	NA	NA	NA	NA	NA	NA	NA	F	NA	NA	NA	NA	NA	NA	NA	NA	NA	NA	NA	NA	NA	NA	NA	NA	NA	NA	NA
AAATGCCGGTATGGCGCCGGCTGCGAGACAC	9	GCAAAATGCCGGTATGGCGCCGGCTGCGAGACACCGAGC	39	0.0409828126833299	14.537826	1	-3.86174	F	NA	NA	NA	NA	NA	NA	NA	NA	NA	NA	NA	NA	NA	NA	NA	NA	NA	NA	F	NA	NA	NA	NA	NA	NA	NA	NA	NA	NA	NA	NA	NA	NA	NA	NA	NA	NA	NA
CAGTGCAAGGCAATCATAATCTCTGGTGAGA	4	GGCAGTGCAAGGCAATCATAATCTCTGGTGAGAT	34	0.0424238637435241	18.058696	4.492333	-2.007157	T	9517	chr10	120653620	120653636	NA	17S17M	0	0	0	1	0	17	F	T	0.5	0.941176470588235	1	1	F	NA	ENSG00000274461	AC023282.1	+	lncRNA	NA	NA	NA	NA	NA	NA	NA	NA	NA	NA	NA	NA	F	T
ACGAGGTCATCGTGACGTCGGGCCATTCCGG	6	GCCAACGAGGTCATCGTGACGTCGGGCCATTCCGGC	36	0.028703341942535	12.096087	1.090333	-3.4717	F	NA	NA	NA	NA	NA	NA	NA	NA	NA	NA	NA	NA	NA	NA	NA	NA	NA	NA	F	NA	NA	NA	NA	NA	NA	NA	NA	NA	NA	NA	NA	NA	NA	NA	NA	NA	NA	NA
ACGTCAATGATGTCGGACTAAAATGTGGGAT	35	AGTTATCCACCGCCATACGTGGGACATAATCCCACATTTTAGTCCGACATCATTGACGTGTGAAATTTTCC	71	0.00436579799818016	57.104348	2.014667	-4.824987	F	NA	NA	NA	NA	NA	NA	NA	NA	NA	NA	NA	NA	NA	NA	NA	NA	NA	NA	F	NA	NA	NA	NA	NA	NA	NA	NA	NA	NA	NA	NA	NA	NA	NA	NA	NA	NA	NA
ACCGCGGTTCCGGCGGATCCGCCAGCAATTG	8	CAATTGCTGGCGGATCCGCCGGAACCGCGGTCCGACGA	38	0.00900958210993513	1	9.749	3.285254	F	NA	NA	NA	NA	NA	NA	NA	NA	NA	NA	NA	NA	NA	NA	NA	NA	NA	NA	F	NA	NA	NA	NA	NA	NA	NA	NA	NA	NA	NA	NA	NA	NA	NA	NA	NA	NA	NA
ATGGAATGGAATGGAATGGAATCAACCAGAC	1	ATGGAATGGAATGGAATGGAATCAACCAGAC	31	0.0447776995615309	66.307391	2.185667	-4.923024	T	7922	chr2	89835030	89835060	NA	31M	0	0	0	1	0	0	F	F	1	0.967741935483871	15	1	F	NA	NA	NA	NA	NA	NA	NA	NA	NA	ENSG00000283659	+	AC006453.5	151827	ENSG00000251039	+	IGKV2D-40	16730	NA	NA
CCGACGCGCAGGACATGCGCGGCATCCACGA	2	GCCGACGCGCAGGACATGCGCGGCATCCACGA	32	0.0300045267100057	18.657391	3.598667	-2.374213	T	10929	chr3	49412517	49412532	NA	6S16M10S	0	0	0	0	10	6	T	T	0.5	1	1	0	F	NA	ENSG00000067560	RHOA	-	protein_coding	NA	NA	NA	NA	NA	NA	NA	NA	NA	NA	NA	NA	T	F
AGCAATCGCCACGCCAGCGACTGTCTTGCGC	36	GCGATCCGTTCGTCGAACACAAAGCAATCGCCACGCCAGCGACTGTCTTGCGCCGGCGTGTTCTCG	66	0.0278750189323149	9.156087	1	-3.194731	F	NA	NA	NA	NA	NA	NA	NA	NA	NA	NA	NA	NA	NA	NA	NA	NA	NA	NA	F	NA	NA	NA	NA	NA	NA	NA	NA	NA	NA	NA	NA	NA	NA	NA	NA	NA	NA	NA
AGCTTGTCAGGAGCCGAGCCGCTCACACATA	13	CTCCGTCGACAGCTTGTCAGGAGCCGAGCCGCTCACACATAGC	43	0.0185187946253044	1	9.746	3.28481	F	NA	NA	NA	NA	NA	NA	NA	NA	NA	NA	NA	NA	NA	NA	NA	NA	NA	NA	F	NA	NA	NA	NA	NA	NA	NA	NA	NA	NA	NA	NA	NA	NA	NA	NA	NA	NA	NA
CGGCGAGCTTCCGGCCGAAGACGCGCTTGGA	61	CGTGCTGCCCTGGTTCGCTCGCGCCGGCGAGCTTCCGGCCGAAGACGCGCTTGGACTCGGCGAGGCGCGCAAGCCCGGCCAATGCAAGATCGCG	94	0.0278750189323149	1	8.629333	3.109249	F	NA	NA	NA	NA	NA	NA	NA	NA	NA	NA	NA	NA	NA	NA	NA	NA	NA	NA	F	NA	NA	NA	NA	NA	NA	NA	NA	NA	NA	NA	NA	NA	NA	NA	NA	NA	NA	NA
CCTGGATTTTCGTAGTTCAACGAACCGACGA	15	TCCTGGATTTTCGTAGTTCAACGAACCGACGATCCACTCGAGCAT	45	0.0381200291504216	1	8.816333	3.140179	F	NA	NA	NA	NA	NA	NA	NA	NA	NA	NA	NA	NA	NA	NA	NA	NA	NA	NA	F	NA	NA	NA	NA	NA	NA	NA	NA	NA	NA	NA	NA	NA	NA	NA	NA	NA	NA	NA
AGACCTGGCTTCGAGCTCGAAGCCAGCCAAC	17	CTCCAATCCGCAGACCTGGCTTCGAGCTCGAAGCCAGCCAACCTCGC	47	0.0395354427063366	18.963043	1	-4.245119	F	NA	NA	NA	NA	NA	NA	NA	NA	NA	NA	NA	NA	NA	NA	NA	NA	NA	NA	F	NA	NA	NA	NA	NA	NA	NA	NA	NA	NA	NA	NA	NA	NA	NA	NA	NA	NA	NA
CAAGCCAGCAAATCCTCGTATTCGTAACCGC	5	CCCGCAAGCCAGCAAATCCTCGTATTCGTAACCGC	35	0.0302855813662328	2.502609	12.315333	2.298951	F	NA	NA	NA	NA	NA	NA	NA	NA	NA	NA	NA	NA	NA	NA	NA	NA	NA	NA	F	NA	NA	NA	NA	NA	NA	NA	NA	NA	NA	NA	NA	NA	NA	NA	NA	NA	NA	NA
GGAGGTCGCAAGAAGCTCGCCCACGTCCCCA	21	CCTCGCCAGGCACCGGAGGAGGTCGCAAGAAGCTCGCCCACGTCCCCACCA	51	0.00714407529912257	36.952609	1	-5.207604	F	NA	NA	NA	NA	NA	NA	NA	NA	NA	NA	NA	NA	NA	NA	NA	NA	NA	NA	F	NA	NA	NA	NA	NA	NA	NA	NA	NA	NA	NA	NA	NA	NA	NA	NA	NA	NA	NA
GACTGATGAAACGGCCGGGTGACACGACAGC	21	GTCGCCCTGGCCCCGAAGGTCGCTGTCGTGTCACCCGGCCGTTTCATCAGTCT	53	0.0224766764190257	3.96087	16.275667	2.038827	F	NA	NA	NA	NA	NA	NA	NA	NA	NA	NA	NA	NA	NA	NA	NA	NA	NA	NA	F	NA	NA	NA	NA	NA	NA	NA	NA	NA	NA	NA	NA	NA	NA	NA	NA	NA	NA	NA
AAGGGGCCGCTAACGCTACCCAAACTGGACC	6	AAGGGGCCGCTAACGCTACCCAAACTGGACCCGGCC	36	0.0464213710915646	15.346087	1.485667	-3.368688	F	NA	NA	NA	NA	NA	NA	NA	NA	NA	NA	NA	NA	NA	NA	NA	NA	NA	NA	F	NA	NA	NA	NA	NA	NA	NA	NA	NA	NA	NA	NA	NA	NA	NA	NA	NA	NA	NA
CCATTTTACCTAACCCCTGTCTTTAGATTTA	1	CCATTTTACCTAACCCCTGTCTTTAGATTTA	31	0.0498735139711201	9.32	1.658667	-2.490306	T	10406	chrM	5839	5861	NA	8S23M	0	0	0	0	0	8	F	T	0.741935483870968	1	1	0	F	NA	ENSG00000210144	MT-TY	-	Mt_tRNA	NA	NA	NA	NA	NA	NA	NA	NA	NA	NA	NA	NA	T	F
GGGATCGTGCCCTACGACAAGCTCAGCGTAC	18	TCGGCTTCGTGCTGACCGGGATCGTGCCCTACGACAAGCTCAGCGTAC	48	0.0200583165458227	32.712174	1	-5.031756	F	NA	NA	NA	NA	NA	NA	NA	NA	NA	NA	NA	NA	NA	NA	NA	NA	NA	NA	F	NA	NA	NA	NA	NA	NA	NA	NA	NA	NA	NA	NA	NA	NA	NA	NA	NA	NA	NA
AAGAGTGTAGGATAGGGTGTAGATCCCGGGG	3	AAAGAGTGTAGGATAGGGTGTAGATCCCGGGGG	33	0.0366919109326738	48.656957	1	-5.604574	T	944	chr6	120054394	120054410	NA	17M16S	0	0	0	0	16	0	T	F	0.515151515151515	1	1	0	F	NA	NA	NA	NA	NA	NA	NA	NA	NA	ENSG00000265725	+	MIR3144	39138	ENSG00000286540	+	AL096854.1	408100	NA	NA
CGATGTCGGCGCCTTCGTCAAGCGCTGCACG	3	CGATGTCGGCGCCTTCGTCAAGCGCTGCACGGC	33	0.0378725422410341	34.566957	5.680333	-2.605346	F	NA	NA	NA	NA	NA	NA	NA	NA	NA	NA	NA	NA	NA	NA	NA	NA	NA	NA	F	NA	NA	NA	NA	NA	NA	NA	NA	NA	NA	NA	NA	NA	NA	NA	NA	NA	NA	NA
GTCGAAATATCAGGTTTTCCTGACAAATTTA	25	GTCGAAATATCAGGTTTTCCTGACAAATTTACCGCGGGGAACCAGGTCTTGCCAG	55	0.0339678776890739	1	4.513333	2.174193	F	NA	NA	NA	NA	NA	NA	NA	NA	NA	NA	NA	NA	NA	NA	NA	NA	NA	NA	F	NA	NA	NA	NA	NA	NA	NA	NA	NA	NA	NA	NA	NA	NA	NA	NA	NA	NA	NA
AGGCAAAGGCATGCGGCTAAAGGCATAGGGC	9	CAAGGCAAAGGCATGCGGCTAAAGGCATAGGGCTAAAGA	39	0.0478626953014704	18.939565	1.049667	-4.1734	F	NA	NA	NA	NA	NA	NA	NA	NA	NA	NA	NA	NA	NA	NA	NA	NA	NA	NA	F	NA	NA	NA	NA	NA	NA	NA	NA	NA	NA	NA	NA	NA	NA	NA	NA	NA	NA	NA
CGCCAGTTGATTAGGGTGCTTAGCTGTTAAC	1	CGCCAGTTGATTAGGGTGCTTAGCTGTTAAC	31	0.00690094108535708	1.113913	6.388	2.519728	T	13646	chr1	630861	630891	NA	31M	0	0	0	1	0	0	F	F	1	0.967741935483871	2	1	F	NA	ENSG00000230021	AL669831.3	-	transcribed_processed_pseudogene	NA	NA	NA	NA	NA	NA	NA	NA	NA	NA	NA	NA	F	T
AACGCTTCATGACGTCAACGTCGAGAACCTC	70	CCGTCGACAATCCGGAACGCTTCATGACGTCAACGTCGAGAACCTCTTTCACGCGCGCGGCGAAGTCATTAACGAATCCATCACCCAATGCTTCACGCATCTGTTTGGCGGTCTTC	116	0.0152788404942966	83.382609	1.253333	-6.055905	F	NA	NA	NA	NA	NA	NA	NA	NA	NA	NA	NA	NA	NA	NA	NA	NA	NA	NA	F	NA	NA	NA	NA	NA	NA	NA	NA	NA	NA	NA	NA	NA	NA	NA	NA	NA	NA	NA
GCCGGGCGATCTCCTTGTCCTTGTTGGCGAC	31	GGGCAACCCTCGTCGCCAACAAGGACAAGGAGATCGCCCGGCTCGAGGGCGCCTACACCAC	61	0.0213839785343965	1	9.853	3.300563	F	NA	NA	NA	NA	NA	NA	NA	NA	NA	NA	NA	NA	NA	NA	NA	NA	NA	NA	F	NA	NA	NA	NA	NA	NA	NA	NA	NA	NA	NA	NA	NA	NA	NA	NA	NA	NA	NA
AACGTGAAGGTCATCACCGCGCTGGCACCGG	3	CAACGTGAAGGTCATCACCGCGCTGGCACCGGG	33	0.0294316260371882	20.025217	1.211333	-4.04715	T	756	chr4	80266642	80266657	NA	16M17S	0	0	0	0	17	0	T	F	0.484848484848485	1	1	0	F	NA	ENSG00000138675	FGF5	+	protein_coding	NA	NA	NA	NA	NA	NA	NA	NA	NA	NA	NA	NA	T	F
TCGGGCTGGCGTTCTATTCGGCGGATGGAAA	27	CTTCAGCCCCGGCAGCTTTCCATCCGCCGAATAGAACGCCAGCCCGAACGAATCGGT	57	0.00658238756144964	1	10.194667	3.349743	F	NA	NA	NA	NA	NA	NA	NA	NA	NA	NA	NA	NA	NA	NA	NA	NA	NA	NA	F	NA	NA	NA	NA	NA	NA	NA	NA	NA	NA	NA	NA	NA	NA	NA	NA	NA	NA	NA
CGTCGTGAAGATTGAGCGCGGCATCCTGGAC	41	GATTGCTGCGATCCAGCGCGTCGTGAAGATTGAGCGCGGCATCCTGGACATCGTGAAGAACCAGTTCAACGCGGGCAGCG	80	0.0283961857684972	22.030435	1	-4.461426	F	NA	NA	NA	NA	NA	NA	NA	NA	NA	NA	NA	NA	NA	NA	NA	NA	NA	NA	F	NA	NA	NA	NA	NA	NA	NA	NA	NA	NA	NA	NA	NA	NA	NA	NA	NA	NA	NA
GCCGAATGACGGGTTCCTAACAGGAAGGTCC	14	CGCCGAATGACGGGTTCCTAACAGGAAGGTCCAACGTGAGCAAA	44	0.0262045650301071	44.863478	4.117333	-3.445759	F	NA	NA	NA	NA	NA	NA	NA	NA	NA	NA	NA	NA	NA	NA	NA	NA	NA	NA	F	NA	NA	NA	NA	NA	NA	NA	NA	NA	NA	NA	NA	NA	NA	NA	NA	NA	NA	NA
GAGGAGGATGCAGCTTGGCCGTCGACAGCAC	1	GAGGAGGATGCAGCTTGGCCGTCGACAGCAC	31	0.0388691149561925	7.86	1	-2.974529	F	NA	NA	NA	NA	NA	NA	NA	NA	NA	NA	NA	NA	NA	NA	NA	NA	NA	NA	F	NA	NA	NA	NA	NA	NA	NA	NA	NA	NA	NA	NA	NA	NA	NA	NA	NA	NA	NA
CAACGTCGTATGCGACGTCATTGACGGTCAC	29	GTGACCGTCAATGACGTCGCATACGACGTTGACGTTGACGTTGATAAGACCGCCAATGCGCC	62	0.0316685091967969	50.937391	1.81	-4.814663	F	NA	NA	NA	NA	NA	NA	NA	NA	NA	NA	NA	NA	NA	NA	NA	NA	NA	NA	F	NA	NA	NA	NA	NA	NA	NA	NA	NA	NA	NA	NA	NA	NA	NA	NA	NA	NA	NA
AGGCCAGCAGCACCTCGAGCTCGGTCCCGGC	24	GCGGTATCAGCCGAGGCCAGCAGCACCTCGAGCTCGGTCCCGGCCGGGCCACCG	54	0.0359893214177409	7.246957	1	-2.857375	F	NA	NA	NA	NA	NA	NA	NA	NA	NA	NA	NA	NA	NA	NA	NA	NA	NA	NA	F	NA	NA	NA	NA	NA	NA	NA	NA	NA	NA	NA	NA	NA	NA	NA	NA	NA	NA	NA
GTGCGCCATGAGGTAACGGCCTATCTGTGCA	25	AAGCGAGGATGTGGCTGCACAGATAGGCCGTTACCTCATGGCGCACCAGGATATC	55	0.00268720918510221	71.374783	1.355	-5.71905	F	NA	NA	NA	NA	NA	NA	NA	NA	NA	NA	NA	NA	NA	NA	NA	NA	NA	NA	F	NA	NA	NA	NA	NA	NA	NA	NA	NA	NA	NA	NA	NA	NA	NA	NA	NA	NA	NA
GGCGAACAGGCCCGCATGCTCTGGGCCGAAA	3	TGGCGAACAGGCCCGCATGCTCTGGGCCGAAAA	33	0.0375722686068233	10.843913	1.609	-2.752649	T	19009	chr12	133130209	133130224	NA	6S16M11S	0	0	0	0	11	6	T	T	0.484848484848485	1	1	0	F	NA	ENSG00000214029	ZNF891	-	protein_coding	NA	NA	NA	NA	NA	NA	NA	NA	NA	NA	NA	NA	F	T
CCGTGAGCCAGCGGTCGATGTCGTGAAAGCC	3	CCGTGAGCCAGCGGTCGATGTCGTGAAAGCCCG	33	0.0435750017789263	14.964783	1.437333	-3.380105	F	NA	NA	NA	NA	NA	NA	NA	NA	NA	NA	NA	NA	NA	NA	NA	NA	NA	NA	F	NA	NA	NA	NA	NA	NA	NA	NA	NA	NA	NA	NA	NA	NA	NA	NA	NA	NA	NA
CCCCTTACCCTCCCCTTTTCCCCTACCCGCC	2	CCCCCTTACCCTCCCCTTTTCCCCTACCCGCC	32	0.046748619789214	133.387826	1	-7.059483	T	10615	chr11	59351475	59351492	NA	4S18M10S	0	0	0	0	10	4	T	T	0.5625	1	1	0	F	NA	NA	NA	NA	NA	NA	NA	NA	NA	ENSG00000255386	-	OR5BR1P	17390	ENSG00000176495	+	OR5AN1	7402	NA	NA
CGGGAACAGCCCAGCTTGAGAATCGGGCGGC	1	CGGGAACAGCCCAGCTTGAGAATCGGGCGGC	31	0.0275970317588397	16.520435	1.494	-3.467	T	14776	chr11	116701676	116701694	NA	19M12S	0	0	0	2	12	0	T	F	0.612903225806452	0.894736842105263	1	2	F	NA	NA	NA	NA	NA	NA	NA	NA	NA	ENSG00000237937	+	AP000770.1	43382	ENSG00000137656	-	BUD13	46475	NA	NA
CCCGATAGTCCGCTGGGCGAAGTCGTCAAAC	31	GCATTCCGCAAATCGCCCGATAGTCCGCTGGGCGAAGTCGTCAAACGGCGCTTGGGCAGGC	61	0.0102635057903666	1	9.749333	3.285304	F	NA	NA	NA	NA	NA	NA	NA	NA	NA	NA	NA	NA	NA	NA	NA	NA	NA	NA	F	NA	NA	NA	NA	NA	NA	NA	NA	NA	NA	NA	NA	NA	NA	NA	NA	NA	NA	NA
GCGGCCGCGACATGAATGAGCTGGCCGCGAC	52	GGCATCGATGCCGCTCATCCGAGTCTGCGCCGTGAACGGCACGAAGGTCGCGGCCAGCTCATTCATGTCGCGGCCGCGGATG	82	0.0432501473106903	31.65913	1.014	-4.964492	F	NA	NA	NA	NA	NA	NA	NA	NA	NA	NA	NA	NA	NA	NA	NA	NA	NA	NA	F	NA	NA	NA	NA	NA	NA	NA	NA	NA	NA	NA	NA	NA	NA	NA	NA	NA	NA	NA
CGATGTTCTGGAAGCCGTTCCATAGCTTCCC	18	GTACCGATGTTCTGGAAGCCGTTCCATAGCTTCCCGTTGACGCTGCTCGCAA	52	0.0255533400045377	28.020435	2.596	-3.432117	F	NA	NA	NA	NA	NA	NA	NA	NA	NA	NA	NA	NA	NA	NA	NA	NA	NA	NA	F	NA	NA	NA	NA	NA	NA	NA	NA	NA	NA	NA	NA	NA	NA	NA	NA	NA	NA	NA
TACTATTTTTTAACCAAATCAACAACAACCA	1	TACTATTTTTTAACCAAATCAACAACAACCA	31	0.0442756376542536	1.268261	7.400333	2.544739	T	19967	chrX	126473000	126473030	NA	31M	0	0	0	1	0	0	F	F	1	0.967741935483871	1	1	F	NA	ENSG00000232177	MTND4P24	+	processed_pseudogene	NA	NA	NA	NA	NA	NA	NA	NA	NA	NA	NA	NA	T	F
CGGCAGTCGCGGAGCCTGCAAGCACGGCGGC	36	GGCGGCAGTCGCGGAGCCTGCAAGCACGGCGGCAATCATGATCGCACCGATCAGACGGTTGCGTCGGC	68	0.0289833711645763	16.963913	2.694	-2.654647	F	NA	NA	NA	NA	NA	NA	NA	NA	NA	NA	NA	NA	NA	NA	NA	NA	NA	NA	F	NA	NA	NA	NA	NA	NA	NA	NA	NA	NA	NA	NA	NA	NA	NA	NA	NA	NA	NA
CCTGACCACCTTCCTGACGATGGCCTACATC	3	GGCCTGACCACCTTCCTGACGATGGCCTACATC	33	0.031771330347361	21.104783	1	-4.399498	T	12024	chr9	34508636	34508652	NA	17M16S	0	0	0	0	16	0	T	F	0.515151515151515	1	2	0	F	NA	ENSG00000122735	DNAI1	+	protein_coding	NA	NA	NA	NA	NA	NA	NA	NA	NA	NA	NA	NA	F	T
ACGGAGTTGAAGGACGATCCGGTGCACAGCG	15	TGCAGCGCGACGCTGTGCACCGGATCGTCCTTCAACTCCGTCCAG	45	0.018588606747619	80.004348	1.672333	-5.580144	F	NA	NA	NA	NA	NA	NA	NA	NA	NA	NA	NA	NA	NA	NA	NA	NA	NA	NA	F	NA	NA	NA	NA	NA	NA	NA	NA	NA	NA	NA	NA	NA	NA	NA	NA	NA	NA	NA
GCGAGCGAATTCCGCCTCGCACTCCTCCGAC	27	GGAGTTCAGCCGGTCGGAGGAGTGCGAGGCGGAATTCGCTCGCCTGATCGAGCTCGG	57	0.0229085999246115	1	6.282	2.651224	F	NA	NA	NA	NA	NA	NA	NA	NA	NA	NA	NA	NA	NA	NA	NA	NA	NA	NA	F	NA	NA	NA	NA	NA	NA	NA	NA	NA	NA	NA	NA	NA	NA	NA	NA	NA	NA	NA
ACCGCGCCAGGACAACAGCCCACAAGCGGCT	6	GCGCAGCCGCTTGTGGGCTGTTGTCCTGGCGCGGTC	36	0.0369915786585943	35.866522	1.402333	-4.676737	T	2461	chr3	126541312	126541332	NA	15S21M	0	0	0	2	0	15	F	T	0.583333333333333	0.904761904761905	1	2	F	NA	ENSG00000180697	C3orf22	-	protein_coding	NA	NA	NA	NA	NA	NA	NA	NA	NA	NA	NA	NA	F	T
CCTATACGCTGGTCATTGCTGCCGCGCCCAC	8	CATATGACCTATACGCTGGTCATTGCTGCCGCGCCCAC	38	0.0310963802243457	22.096957	1	-4.465776	F	NA	NA	NA	NA	NA	NA	NA	NA	NA	NA	NA	NA	NA	NA	NA	NA	NA	NA	F	NA	NA	NA	NA	NA	NA	NA	NA	NA	NA	NA	NA	NA	NA	NA	NA	NA	NA	NA
AGCTGCAAAGACACCGGTAAGCACTGGCAGG	14	GTCCCGCCTTAACCATGGTGGCCCCCTGAGCTGCAAAGACACCGGTAAGCACTGGCAGGATC	62	0.0473634898477053	91.432174	1.257	-6.184645	F	NA	NA	NA	NA	NA	NA	NA	NA	NA	NA	NA	NA	NA	NA	NA	NA	NA	NA	F	NA	NA	NA	NA	NA	NA	NA	NA	NA	NA	NA	NA	NA	NA	NA	NA	NA	NA	NA
ATCTGCGCTGAGGTCACCAACATGAAAGCGA	60	GTCGACTTCAAGCTTTACAACGAAAAAGCCAATCTGCGCTGAGGTCACCAACATGAAAGCGATCATTGAAATCGAAAGCCTGGCGTCGAGCC	92	0.0110005332614046	1.177826	12.609667	3.420332	F	NA	NA	NA	NA	NA	NA	NA	NA	NA	NA	NA	NA	NA	NA	NA	NA	NA	NA	F	NA	NA	NA	NA	NA	NA	NA	NA	NA	NA	NA	NA	NA	NA	NA	NA	NA	NA	NA
ACCAGGTCCAGACACAATGAGGATTGACAGA	10	CACCAGGTCCAGACACAATGAGGATTGACAGATTGAGAGC	40	0.0206059820001895	19.276087	1.026	-4.23171	F	NA	NA	NA	NA	NA	NA	NA	NA	NA	NA	NA	NA	NA	NA	NA	NA	NA	NA	F	NA	NA	NA	NA	NA	NA	NA	NA	NA	NA	NA	NA	NA	NA	NA	NA	NA	NA	NA
CGGCCTGTTCGGCAAAGAGGTCGCATGACCG	22	GATCGGCCTGCAGCTCGGTCATGCGACCTCTTTGCCGAACAGGCCGGAGGGC	52	0.00900958210993513	58.908261	2.994	-4.298324	F	NA	NA	NA	NA	NA	NA	NA	NA	NA	NA	NA	NA	NA	NA	NA	NA	NA	NA	F	NA	NA	NA	NA	NA	NA	NA	NA	NA	NA	NA	NA	NA	NA	NA	NA	NA	NA	NA
ACCGTCAGAGCCGACGGTGTACGTCGGCAGG	11	GCACCGTCAGAGCCGACGGTGTACGTCGGCAGGGTCACCATTG	43	0.0344976574986544	33.971304	1.174	-4.854812	F	NA	NA	NA	NA	NA	NA	NA	NA	NA	NA	NA	NA	NA	NA	NA	NA	NA	NA	F	NA	NA	NA	NA	NA	NA	NA	NA	NA	NA	NA	NA	NA	NA	NA	NA	NA	NA	NA
CCTGCGCTGTGCTGCCGCCCATTGATGCCCA	22	CCTCGACGGGCAGATGGGCATCAATGGGCGGCAGCACAGCGCAGGGATTGGC	52	0.0370764721292937	47.022174	1	-5.555269	F	NA	NA	NA	NA	NA	NA	NA	NA	NA	NA	NA	NA	NA	NA	NA	NA	NA	NA	F	NA	NA	NA	NA	NA	NA	NA	NA	NA	NA	NA	NA	NA	NA	NA	NA	NA	NA	NA
GCCTCCCGCCTTGACGCCAATTACGAAAGGA	41	GCCTCGGTTGCCGCATCGTGGCGTTACCACAGGTCGCCTCCCGCCTTGACGCCAATTACGAAAGGACCAAACG	73	0.0343035844918238	96.568696	1.055667	-6.515329	F	NA	NA	NA	NA	NA	NA	NA	NA	NA	NA	NA	NA	NA	NA	NA	NA	NA	NA	F	NA	NA	NA	NA	NA	NA	NA	NA	NA	NA	NA	NA	NA	NA	NA	NA	NA	NA	NA
ACCTGGTCAAGGACAGGGACGCCTATCGCGC	2	AACCTGGTCAAGGACAGGGACGCCTATCGCGC	32	0.0442933025916679	1.04087	6.006333	2.528695	T	2641	chr4	189811742	189811760	NA	13S19M	0	0	0	2	0	13	F	T	0.59375	0.894736842105263	3	2	F	NA	ENSG00000245685	FRG1-DT	-	lncRNA	NA	NA	NA	NA	NA	NA	NA	NA	NA	NA	NA	NA	F	T
CCCTACAATGCCAATCAGCAGAACGAGAACG	31	CCCGCCCTACAATGCCAATCAGCAGAACGAGAACGACAACAACAAGAACCGGACCTATCCG	61	0.00971976407339593	1	10.469	3.388052	F	NA	NA	NA	NA	NA	NA	NA	NA	NA	NA	NA	NA	NA	NA	NA	NA	NA	NA	F	NA	NA	NA	NA	NA	NA	NA	NA	NA	NA	NA	NA	NA	NA	NA	NA	NA	NA	NA
AAGCAATCCGTAGCGGCCTCCGCCTTGGCGC	1	AAGCAATCCGTAGCGGCCTCCGCCTTGGCGC	31	0.0453433555478675	19.98087	1.465333	-3.769319	T	977	chr5	178589736	178589751	NA	15S16M	0	0	0	0	0	15	F	T	0.516129032258065	1	1	0	F	NA	ENSG00000050767	COL23A1	-	protein_coding	NA	NA	NA	NA	NA	NA	NA	NA	NA	NA	NA	NA	F	T
TCCTATGAAAAAACTTCCTACCACTCACCCA	1	TCCTATGAAAAAACTTCCTACCACTCACCCA	31	0.0432335417920793	10.292174	2.68	-1.941243	T	20263	chr1	629339	629369	NA	31M	0	0	0	1	0	0	F	F	1	0.967741935483871	2	1	F	NA	ENSG00000225972	MTND1P23	+	unprocessed_pseudogene	NA	NA	NA	NA	NA	NA	NA	NA	NA	NA	NA	NA	T	F
CCGGCACCAATGGGCGCGTAGCGTGCCGCTC	6	TCGACCGGCACCAATGGGCGCGTAGCGTGCCGCTCG	36	0.0352965627593229	10.66087	1.020667	-3.384741	F	NA	NA	NA	NA	NA	NA	NA	NA	NA	NA	NA	NA	NA	NA	NA	NA	NA	NA	F	NA	NA	NA	NA	NA	NA	NA	NA	NA	NA	NA	NA	NA	NA	NA	NA	NA	NA	NA
CGTTGGTTGGGGTGCTCACGTGCCCGGCCTC	13	GTCGCATGGAGGCCGGGCACGTGAGCACCCCAACCAACGCCAA	43	0.0290772339076602	29.981739	1	-4.906012	F	NA	NA	NA	NA	NA	NA	NA	NA	NA	NA	NA	NA	NA	NA	NA	NA	NA	NA	F	NA	NA	NA	NA	NA	NA	NA	NA	NA	NA	NA	NA	NA	NA	NA	NA	NA	NA	NA
AAACCGCCTTTGCCATGGCCGGCGTCACGCC	25	CGGCGTGACGCCGGCCATGGCAAAGGCGGTTTCCGCTGACGCCCTGACCCAGGAC	55	0.040643705616311	1	8.994333	3.169016	F	NA	NA	NA	NA	NA	NA	NA	NA	NA	NA	NA	NA	NA	NA	NA	NA	NA	NA	F	NA	NA	NA	NA	NA	NA	NA	NA	NA	NA	NA	NA	NA	NA	NA	NA	NA	NA	NA
GCTCGAGGCCGCGAACTATCCGGTCGCCGAC	2	AGCTCGAGGCCGCGAACTATCCGGTCGCCGAC	32	0.0343363954403255	37.975652	1	-5.247003	F	NA	NA	NA	NA	NA	NA	NA	NA	NA	NA	NA	NA	NA	NA	NA	NA	NA	NA	F	NA	NA	NA	NA	NA	NA	NA	NA	NA	NA	NA	NA	NA	NA	NA	NA	NA	NA	NA
ATTTCCGTATACCAAACGGCCCAAATGACGC	46	GCCAGGGGCTGAATTCGTAAGCCTGACCAGCTTGTCGGATTTCCGTATACCAAACGGCCCAAATGACGCGACCCGAAA	78	0.0122264594102657	1	8.614	3.106683	F	NA	NA	NA	NA	NA	NA	NA	NA	NA	NA	NA	NA	NA	NA	NA	NA	NA	NA	F	NA	NA	NA	NA	NA	NA	NA	NA	NA	NA	NA	NA	NA	NA	NA	NA	NA	NA	NA
AATGTGGTGTACGGGTTGCGGTCGATGAGGG	17	TGCGACGTCACCCTCATCGACCGCAACCCGTACACCACATTCCAGCC	47	0.0441926480111367	105.458696	1.567333	-6.072223	F	NA	NA	NA	NA	NA	NA	NA	NA	NA	NA	NA	NA	NA	NA	NA	NA	NA	NA	F	NA	NA	NA	NA	NA	NA	NA	NA	NA	NA	NA	NA	NA	NA	NA	NA	NA	NA	NA
GCCCGACGTACCGAACTGGTCGTGGCATGAA	10	GCCCGACGTACCGAACTGGTCGTGGCATGAATACGGCATG	40	0.0457672112535275	17.50087	3.486333	-2.327644	F	NA	NA	NA	NA	NA	NA	NA	NA	NA	NA	NA	NA	NA	NA	NA	NA	NA	NA	F	NA	NA	NA	NA	NA	NA	NA	NA	NA	NA	NA	NA	NA	NA	NA	NA	NA	NA	NA
GCGATCAAGGATTTCGCGATCTCCTACGTCA	13	CGAGGCGATCAAGGATTTCGCGATCTCCTACGTCACCCACGGC	43	0.0400374805274978	13.595217	1	-3.765027	F	NA	NA	NA	NA	NA	NA	NA	NA	NA	NA	NA	NA	NA	NA	NA	NA	NA	NA	F	NA	NA	NA	NA	NA	NA	NA	NA	NA	NA	NA	NA	NA	NA	NA	NA	NA	NA	NA
GCTGGGACTGATCCCTAGCATCGGCCGAACC	40	CCAGGCGCTGGGACTGATCCCTAGCATCGGCCGAACCACCGCGGCGGTCGCCAAAAAGTCGCGCCAGTTCG	71	0.00573658027233477	14.953043	2.421333	-2.626566	F	NA	NA	NA	NA	NA	NA	NA	NA	NA	NA	NA	NA	NA	NA	NA	NA	NA	NA	F	NA	NA	NA	NA	NA	NA	NA	NA	NA	NA	NA	NA	NA	NA	NA	NA	NA	NA	NA
GAGGACGCCCTTACCCGGCGCACTCCCACCC	6	CAAGGGTGGGAGTGCGCCGGGTAAGGGCGTCCTCCA	36	0.0441090354116542	28.14913	1	-4.815018	F	NA	NA	NA	NA	NA	NA	NA	NA	NA	NA	NA	NA	NA	NA	NA	NA	NA	NA	F	NA	NA	NA	NA	NA	NA	NA	NA	NA	NA	NA	NA	NA	NA	NA	NA	NA	NA	NA
CGCCTGGTTGGTGTCAGCCACGTTCGGGGCC	41	GACGCGCTAAACGATAGTTTGGGGGGCCCCGAACGTGGCTGACACCAACCAGGCGCGGCTGCGCGACCAGCTGGTCGAGAACTATG	86	0.0197040324530066	15.596957	4.684	-1.735452	F	NA	NA	NA	NA	NA	NA	NA	NA	NA	NA	NA	NA	NA	NA	NA	NA	NA	NA	F	NA	NA	NA	NA	NA	NA	NA	NA	NA	NA	NA	NA	NA	NA	NA	NA	NA	NA	NA
GTAATGGGGTCGTCACGAGTGGCGATTTCCA	3	TGGAAATCGCCACTCGTGACGACCCCATTACAG	33	0.0358301649129806	35.96913	1	-5.168687	T	19421	chr18	22023272	22023288	NA	6S17M10S	0	0	0	0	10	6	T	T	0.515151515151515	1	1	0	F	NA	ENSG00000265758	LINC01900	+	lncRNA	NA	NA	NA	NA	NA	NA	NA	NA	NA	NA	NA	NA	F	T
ACGAACGCCCCCTCCGACAGCTTCGGATGGA	15	GATCTGGTCCATCCGAAGCTGTCGGAGGGGGCGTTCGTCGCCGCA	45	0.00573658027233477	24.537826	2.713333	-3.176869	F	NA	NA	NA	NA	NA	NA	NA	NA	NA	NA	NA	NA	NA	NA	NA	NA	NA	NA	F	NA	NA	NA	NA	NA	NA	NA	NA	NA	NA	NA	NA	NA	NA	NA	NA	NA	NA	NA
ACTGCTGCTGCTCGACGAGCCGACCGAGGGC	18	ATGCGGCCAAAACTGCTGCTGCTCGACGAGCCGACCGAGGGCATCCAGCCCTCGATCATCAAGGATA	67	0.0327038856845934	1	8.579333	3.100865	F	NA	NA	NA	NA	NA	NA	NA	NA	NA	NA	NA	NA	NA	NA	NA	NA	NA	NA	F	NA	NA	NA	NA	NA	NA	NA	NA	NA	NA	NA	NA	NA	NA	NA	NA	NA	NA	NA
GGCAGCGCCAATTGGGAAATGTCGTACATCA	23	GTCGATCCATTTGCTCGTGCAAAACCTGATGTACGACATTTCCCAATTGGCGCTGCCTTGGGATCA	66	0.0195418635070771	1	13.06	3.707083	F	NA	NA	NA	NA	NA	NA	NA	NA	NA	NA	NA	NA	NA	NA	NA	NA	NA	NA	F	NA	NA	NA	NA	NA	NA	NA	NA	NA	NA	NA	NA	NA	NA	NA	NA	NA	NA	NA
ACTGAGGAACGGCATGTTCCAGATCACGGTG	48	GACCACTGCCACGTAGCGCGTAGCCGAGACTGAGGAACGGCATGTTCCAGATCACGGTGCCGATCGCCGTCGCCATCA	78	0.00573658027233477	37.236087	1.118	-5.057709	F	NA	NA	NA	NA	NA	NA	NA	NA	NA	NA	NA	NA	NA	NA	NA	NA	NA	NA	F	NA	NA	NA	NA	NA	NA	NA	NA	NA	NA	NA	NA	NA	NA	NA	NA	NA	NA	NA
CATCGCGTACTGACCCCACTGATACGCACAC	26	GCATCGCGTACTGACCCCACTGATACGCACACAGCACAGTAGCCCGCGAGACTCCT	56	0.0209880928847317	121.36	1.304333	-6.539837	F	NA	NA	NA	NA	NA	NA	NA	NA	NA	NA	NA	NA	NA	NA	NA	NA	NA	NA	F	NA	NA	NA	NA	NA	NA	NA	NA	NA	NA	NA	NA	NA	NA	NA	NA	NA	NA	NA
CTCACAAGACCATTGTAGGCAGAGCCTAGGC	8	GAGATATCTCACAAGACCATTGTAGGCAGAGCCTAGGC	38	0.02165336118832	119.173913	1	-6.896925	T	15521	chr11	14374840	14374858	NA	4S19M15S	0	0	0	0	15	4	T	T	0.5	1	1	0	F	NA	NA	NA	NA	NA	NA	NA	NA	NA	ENSG00000133818	-	RRAS2	10335	ENSG00000255074	+	AC018523.1	65928	NA	NA
TGACGCGGTCGAGCTGGTCGCTGTCCACCAA	11	GCTGTTGCCCGAGCATTGGTGGACAGCGACCAGCTCGACCGCGTCAAA	48	0.0175257797765166	34.81087	5.240333	-2.731807	F	NA	NA	NA	NA	NA	NA	NA	NA	NA	NA	NA	NA	NA	NA	NA	NA	NA	NA	F	NA	NA	NA	NA	NA	NA	NA	NA	NA	NA	NA	NA	NA	NA	NA	NA	NA	NA	NA
AGGATCCCCGCAATCGCGTACTCCTCATCGA	5	GGAGGATCCCCGCAATCGCGTACTCCTCATCGAAA	35	0.0287295115260268	97.872609	1.761	-5.796438	F	NA	NA	NA	NA	NA	NA	NA	NA	NA	NA	NA	NA	NA	NA	NA	NA	NA	NA	F	NA	NA	NA	NA	NA	NA	NA	NA	NA	NA	NA	NA	NA	NA	NA	NA	NA	NA	NA
CAGCAGGGTAGTTTTCCCCGCACCATTAAGG	33	CGAGGGCTGAAGTTCGCCCGCACATAGCCGCAGCAGGGTAGTTTTCCCCGCACCATTAAGGCC	63	0.018588606747619	73.12913	1	-6.192374	F	NA	NA	NA	NA	NA	NA	NA	NA	NA	NA	NA	NA	NA	NA	NA	NA	NA	NA	F	NA	NA	NA	NA	NA	NA	NA	NA	NA	NA	NA	NA	NA	NA	NA	NA	NA	NA	NA
CCTTCATCCCGAGCGGGCCGAGCAGCCTTTC	7	CGCGAAAGGCTGCTCGGCCCGCTCGGGATGAAGGATA	37	0.0448284288378651	1	5.903	2.561448	F	NA	NA	NA	NA	NA	NA	NA	NA	NA	NA	NA	NA	NA	NA	NA	NA	NA	NA	F	NA	NA	NA	NA	NA	NA	NA	NA	NA	NA	NA	NA	NA	NA	NA	NA	NA	NA	NA
CGCCGGCGTCGCCGGTTTGCAGATAGATCAC	3	CGCGCCGGCGTCGCCGGTTTGCAGATAGATCAC	33	0.0411749403435743	1	6.895333	2.78562	F	NA	NA	NA	NA	NA	NA	NA	NA	NA	NA	NA	NA	NA	NA	NA	NA	NA	NA	F	NA	NA	NA	NA	NA	NA	NA	NA	NA	NA	NA	NA	NA	NA	NA	NA	NA	NA	NA
CCCGACGGATCTCGTTGAGGCGAGTGACGAG	40	TCGTAGTGTCACGCAGTTGCTGCAACGCCGGGTGAGCCCGACGGATCTCGTTGAGGCGAGTGACGAGCAG	70	0.00971976407339593	82.646087	1.028	-6.329034	F	NA	NA	NA	NA	NA	NA	NA	NA	NA	NA	NA	NA	NA	NA	NA	NA	NA	NA	F	NA	NA	NA	NA	NA	NA	NA	NA	NA	NA	NA	NA	NA	NA	NA	NA	NA	NA	NA
AAGCTGGAGCCCGAGCCGAGTAGGCCGCGGT	1	AAGCTGGAGCCCGAGCCGAGTAGGCCGCGGT	31	0.0455294187044728	88.791739	1	-6.472354	T	1095	chr17	51790211	51790227	NA	17M14S	0	0	0	2	14	0	T	F	0.548387096774194	0.882352941176471	1	2	F	NA	ENSG00000154975	CA10	-	protein_coding	NA	NA	NA	NA	NA	NA	NA	NA	NA	NA	NA	NA	F	T
ACGCAACGTAAGATCGTGTGCGACGCCATAT	16	AAAAAATATGGCGTCGCACACGATCTTACGTTGCGTTGCACAAAAT	46	0.0468784563611309	7.068261	1.877667	-1.912414	F	NA	NA	NA	NA	NA	NA	NA	NA	NA	NA	NA	NA	NA	NA	NA	NA	NA	NA	F	NA	NA	NA	NA	NA	NA	NA	NA	NA	NA	NA	NA	NA	NA	NA	NA	NA	NA	NA
TCAAGGCCGGCCACAAGGTGACCGCGTTCGA	1	TCAAGGCCGGCCACAAGGTGACCGCGTTCGA	31	0.047999652493561	13.197391	1	-3.722181	F	NA	NA	NA	NA	NA	NA	NA	NA	NA	NA	NA	NA	NA	NA	NA	NA	NA	NA	F	NA	NA	NA	NA	NA	NA	NA	NA	NA	NA	NA	NA	NA	NA	NA	NA	NA	NA	NA
CAGCAGGCACGCTCCCATCAGGCAAACGACG	23	CAGCAGGCACGCTCCCATCAGGCAAACGACGGTGGTGTCGAGCCCGGTCAGGC	53	0.0296996973017715	1	8.964333	3.164196	F	NA	NA	NA	NA	NA	NA	NA	NA	NA	NA	NA	NA	NA	NA	NA	NA	NA	NA	F	NA	NA	NA	NA	NA	NA	NA	NA	NA	NA	NA	NA	NA	NA	NA	NA	NA	NA	NA
CGTCCCATTCGTCGCTGACCTTGGCTTTCTC	4	CGTCCCATTCGTCGCTGACCTTGGCTTTCTCCAG	34	0.0474953613981167	8.54	2.081	-2.036959	F	NA	NA	NA	NA	NA	NA	NA	NA	NA	NA	NA	NA	NA	NA	NA	NA	NA	NA	F	NA	NA	NA	NA	NA	NA	NA	NA	NA	NA	NA	NA	NA	NA	NA	NA	NA	NA	NA
GCGTGAAGGCCTGTCGCGGAATCTTCAATCC	12	ATCGGCGTGAAGGCCTGTCGCGGAATCTTCAATCCATCGAGC	42	0.0257824466866904	31.626957	1	-4.983083	F	NA	NA	NA	NA	NA	NA	NA	NA	NA	NA	NA	NA	NA	NA	NA	NA	NA	NA	F	NA	NA	NA	NA	NA	NA	NA	NA	NA	NA	NA	NA	NA	NA	NA	NA	NA	NA	NA
TAGAACGCCCCGGGATTGTGTTAATTAGCTA	2	TAGCTAATTAACACAATCCCGGGGCGTTCTAT	32	0.043940153236948	6.660435	1	-2.735616	T	19975	chr2	132904759	132904774	NA	16S16M	0	0	0	0	0	16	F	T	0.5	1	3	0	F	NA	ENSG00000176771	NCKAP5	-	protein_coding	NA	NA	NA	NA	NA	NA	NA	NA	NA	NA	NA	NA	F	T
CACCGCCTCCTCGCTCTACGGCACGATCACG	36	GCAGGGCAAGATCGCCGGCACCGCCTCCTCGCTCTACGGCACGATCACGACCTTGCTCGGGATCGG	66	0.027340257967484	1	7.326	2.873026	F	NA	NA	NA	NA	NA	NA	NA	NA	NA	NA	NA	NA	NA	NA	NA	NA	NA	NA	F	NA	NA	NA	NA	NA	NA	NA	NA	NA	NA	NA	NA	NA	NA	NA	NA	NA	NA	NA
CGCCACCGCCAACCGGGTTGCGCTCGAAGCC	20	CGCCACCGCCAACCGGGTTGCGCTCGAAGCCATGATTCTCGCCCGCAACG	50	0.0462478573298041	15.228696	1.809667	-3.072996	F	NA	NA	NA	NA	NA	NA	NA	NA	NA	NA	NA	NA	NA	NA	NA	NA	NA	NA	F	NA	NA	NA	NA	NA	NA	NA	NA	NA	NA	NA	NA	NA	NA	NA	NA	NA	NA	NA
CGACCTCATTGTAGGTCGGAATGATGACAAG	6	AGGTCCTTGTCATCATTCCGACCTACAATGAGGTCG	36	0.0323027297552382	52.313043	1	-5.709099	F	NA	NA	NA	NA	NA	NA	NA	NA	NA	NA	NA	NA	NA	NA	NA	NA	NA	NA	F	NA	NA	NA	NA	NA	NA	NA	NA	NA	NA	NA	NA	NA	NA	NA	NA	NA	NA	NA
GCCGCCTCGCACGCCATTCATGCGATCGCGA	15	AATGCGGTGATCGCGATCGCATGAATGGCGTGCGAGGCGGCGAAG	45	0.0338505080369015	1	4.770667	2.254191	F	NA	NA	NA	NA	NA	NA	NA	NA	NA	NA	NA	NA	NA	NA	NA	NA	NA	NA	F	NA	NA	NA	NA	NA	NA	NA	NA	NA	NA	NA	NA	NA	NA	NA	NA	NA	NA	NA
ACGTTGACTCCGGTACGCGCCCATGGCTCCC	3	GACGTTGACTCCGGTACGCGCCCATGGCTCCCC	33	0.0446715023679679	119.452609	1.298333	-6.523634	T	3499	chr11	1261549	1261564	NA	17S16M	0	0	0	0	0	17	F	T	0.484848484848485	1	1	0	F	NA	ENSG00000117983	MUC5B	+	protein_coding	NA	NA	NA	NA	NA	NA	NA	NA	NA	NA	NA	NA	T	F
AGGCGGGTACCGCCAGATTCAGGATCTGGCG	12	GGCCGGGTACCGCCAGATCCTGAATCTGGCGGTACCCGCCTT	42	0.0324739808000498	63.90913	1	-5.99795	F	NA	NA	NA	NA	NA	NA	NA	NA	NA	NA	NA	NA	NA	NA	NA	NA	NA	NA	F	NA	NA	NA	NA	NA	NA	NA	NA	NA	NA	NA	NA	NA	NA	NA	NA	NA	NA	NA
CGGCAGCGGATCCATCAGCCTGCTGGGCCAA	2	CGGCAGCGGATCCATCAGCCTGCTGGGCCAAC	32	0.022586932382311	54.475217	1	-5.767528	T	14521	chr2	68431747	68431763	NA	17M15S	0	0	0	0	15	0	T	F	0.53125	1	2	0	F	NA	NA	NA	NA	NA	NA	NA	NA	NA	ENSG00000115956	+	PLEK	34295	ENSG00000229462	-	AC127383.1	13946	NA	NA
ACCGTAAACTATGCCGACTAGGGATCGGGCG	5	CTTAACCGTAAACTATGCCGACTAGGGATCGGGCG	35	0.0200583165458227	37.594783	2.772	-3.761533	F	NA	NA	NA	NA	NA	NA	NA	NA	NA	NA	NA	NA	NA	NA	NA	NA	NA	NA	F	NA	NA	NA	NA	NA	NA	NA	NA	NA	NA	NA	NA	NA	NA	NA	NA	NA	NA	NA
GAGGGGCGGGGTGGGGAAAAGGGGAGGGGAA	1	GAGGGGCGGGGTGGGGAAAAGGGGAGGGGAA	31	0.0439725511398246	309.400435	1.069667	-8.17617	T	16949	chr13	98172127	98172146	NA	20M11S	0	0	0	2	11	0	T	F	0.645161290322581	0.9	1	2	F	NA	ENSG00000152767	FARP1	+	protein_coding	NA	NA	NA	NA	NA	NA	NA	NA	NA	NA	NA	NA	F	T
CGGTGACGCCGTTGCCGACGGGGTCGGCGGC	32	GGTCGATCTGCTCCAGCACGGCTTGCGTCTGCACGGTGACGCCGTTGCCGACGGGGTCGGCGGC	64	0.0325157791372987	7.181304	1	-2.844246	F	NA	NA	NA	NA	NA	NA	NA	NA	NA	NA	NA	NA	NA	NA	NA	NA	NA	NA	F	NA	NA	NA	NA	NA	NA	NA	NA	NA	NA	NA	NA	NA	NA	NA	NA	NA	NA	NA
CGTCGCGTTCGTCATATTCACCCTCCTGCGC	15	CGTCGCGTTCGTCATATTCACCCTCCTGCGCATCGCGCCGGGAGA	45	0.0116438008749242	17.172609	1.916333	-3.163689	F	NA	NA	NA	NA	NA	NA	NA	NA	NA	NA	NA	NA	NA	NA	NA	NA	NA	NA	F	NA	NA	NA	NA	NA	NA	NA	NA	NA	NA	NA	NA	NA	NA	NA	NA	NA	NA	NA
AGCCAATCCCTAGCGCCTCCACAGCCGGAGC	22	AGAGAAGGGATGCAATGAGCCAATCCCTAGCGCCTCCACAGCCGGAGCAGCG	52	0.00919235951686797	10.976957	1.261667	-3.121075	F	NA	NA	NA	NA	NA	NA	NA	NA	NA	NA	NA	NA	NA	NA	NA	NA	NA	NA	F	NA	NA	NA	NA	NA	NA	NA	NA	NA	NA	NA	NA	NA	NA	NA	NA	NA	NA	NA
ACAGAGATTAGCTTGCTAATCTGCTGACGAG	47	CCCTCTACTGGGCAACTTCCTATGCATTACTCACCCGTCCGCCGCTCGTCAGCAGATTAGCAAGCTAATCTCTGTTA	77	0.0259859232736573	82.972609	1.201333	-6.109927	F	NA	NA	NA	NA	NA	NA	NA	NA	NA	NA	NA	NA	NA	NA	NA	NA	NA	NA	F	NA	NA	NA	NA	NA	NA	NA	NA	NA	NA	NA	NA	NA	NA	NA	NA	NA	NA	NA
AAGTCCAGCACCTTATGGGTGTTGCTGATAT	19	GGACCGCCATATCAGCAACACCCATAAGGTGCTGGACTTCCTCACCGCC	49	0.0418742235960742	1	4.906667	2.294743	F	NA	NA	NA	NA	NA	NA	NA	NA	NA	NA	NA	NA	NA	NA	NA	NA	NA	NA	F	NA	NA	NA	NA	NA	NA	NA	NA	NA	NA	NA	NA	NA	NA	NA	NA	NA	NA	NA
GCCTCTATCGCGTGGATTTCGAGACTCAGGC	6	TCGGCCTCTATCGCGTGGATTTCGAGACTCAGGCCC	36	0.0338042206473538	1	8.049	3.00881	F	NA	NA	NA	NA	NA	NA	NA	NA	NA	NA	NA	NA	NA	NA	NA	NA	NA	NA	F	NA	NA	NA	NA	NA	NA	NA	NA	NA	NA	NA	NA	NA	NA	NA	NA	NA	NA	NA
CGCGCTTGCCGACCTCAGACTGTCGCCCTCC	75	TCGGGCTTCCGGCCGCGCTTGCCGACCTCAGACTGTCGCCCTCCGATCGCATTCCCGGTGGCGACGACGAGAAGCCCGCCAAGCCGAAACCCAAGAACAGCGAAAAGAACGC	112	0.0152788404942966	1.038261	7.747	2.899469	F	NA	NA	NA	NA	NA	NA	NA	NA	NA	NA	NA	NA	NA	NA	NA	NA	NA	NA	F	NA	NA	NA	NA	NA	NA	NA	NA	NA	NA	NA	NA	NA	NA	NA	NA	NA	NA	NA
CGCGCTTGGGATCCGCGATGTAGGCCTGCAA	1	CGCGCTTGGGATCCGCGATGTAGGCCTGCAA	31	0.0494152044138999	7.869565	1	-2.976284	F	NA	NA	NA	NA	NA	NA	NA	NA	NA	NA	NA	NA	NA	NA	NA	NA	NA	NA	F	NA	NA	NA	NA	NA	NA	NA	NA	NA	NA	NA	NA	NA	NA	NA	NA	NA	NA	NA
CGCATCCTAACCTGCGCCGAGCGTGGCGTAA	6	CTTTTACGCCACGCTCGGCGCAGGTTAGGATGCGAC	36	0.0227966102419207	22.865652	1.907667	-3.583301	F	NA	NA	NA	NA	NA	NA	NA	NA	NA	NA	NA	NA	NA	NA	NA	NA	NA	NA	F	NA	NA	NA	NA	NA	NA	NA	NA	NA	NA	NA	NA	NA	NA	NA	NA	NA	NA	NA
GTTATGTTGTGGACGACTCAGAGGTCGCCAA	30	CGCCCTCAAAGACAAGCTTGGCGACCTCTGAGTCGTCCACAACATAACGCAGTCTGTCCCAGGGACCCGCTC	72	0.0228646485486425	43.053913	1.117	-5.268443	F	NA	NA	NA	NA	NA	NA	NA	NA	NA	NA	NA	NA	NA	NA	NA	NA	NA	NA	F	NA	NA	NA	NA	NA	NA	NA	NA	NA	NA	NA	NA	NA	NA	NA	NA	NA	NA	NA
AACGACACGGCGCCGGCCGCGAAGGCCGCCA	3	GGAACGACACGGCGCCGGCCGCGAAGGCCGCCA	33	0.0440306136980754	25.580435	1	-4.676969	T	654	chr19	51713814	51713830	NA	16S17M	0	0	0	1	0	16	F	T	0.515151515151515	0.941176470588235	1	1	F	NA	ENSG00000105509	HAS1	-	protein_coding	NA	NA	NA	NA	NA	NA	NA	NA	NA	NA	NA	NA	T	F
GTTAAGGCCCCTAAGGGTGTGCTAAGTGGAA	11	CAGATCGCCGGTTAAGGCCCCTAAGGGTGTGCTAAGTGGAA	41	0.0303711035359431	100.973913	9.158	-3.462806	T	19770	chrX	104679315	104679334	NA	11S20M10S	0	0	0	0	10	11	T	T	0.48780487804878	1	1	0	F	NA	ENSG00000189108	IL1RAPL2	+	protein_coding	NA	NA	NA	NA	NA	NA	NA	NA	NA	NA	NA	NA	F	T
CACCCTTCACGACCTCCCGCAAGAAGCTAGC	28	GCTAGCTTCTTGCGGGAGGTCGTGAAGGGTGAGCCCATCGCGGGCCACCAAAGCGTCA	58	0.0161506294623084	35.921739	1.081333	-5.053974	F	NA	NA	NA	NA	NA	NA	NA	NA	NA	NA	NA	NA	NA	NA	NA	NA	NA	NA	F	NA	NA	NA	NA	NA	NA	NA	NA	NA	NA	NA	NA	NA	NA	NA	NA	NA	NA	NA
AGGCTGCCAAACGCGCGGTTTCGGATGCGAT	18	AAGGCTGCCAAACGCGCGGTTTCGGATGCGATCCGCCATTCCAGCCTC	48	0.019371108668363	11.151739	1.027667	-3.439824	F	NA	NA	NA	NA	NA	NA	NA	NA	NA	NA	NA	NA	NA	NA	NA	NA	NA	NA	F	NA	NA	NA	NA	NA	NA	NA	NA	NA	NA	NA	NA	NA	NA	NA	NA	NA	NA	NA
AGGCCGTCGACCGTCGTCATGCGCGACGCGA	4	TCGCGTCGCGCATGACGACGGTCGACGGCCTCAC	34	0.0448284288378651	13.008261	3.436	-1.920626	F	NA	NA	NA	NA	NA	NA	NA	NA	NA	NA	NA	NA	NA	NA	NA	NA	NA	NA	F	NA	NA	NA	NA	NA	NA	NA	NA	NA	NA	NA	NA	NA	NA	NA	NA	NA	NA	NA
CCGCTGCAAACCGCTGACGGAACCACGGTGC	13	GGGTGCTGACCCCGCTGCAAACCGCTGACGGAACCACGGTGCT	43	0.0426272072787428	7.186087	1.122333	-2.678706	F	NA	NA	NA	NA	NA	NA	NA	NA	NA	NA	NA	NA	NA	NA	NA	NA	NA	NA	F	NA	NA	NA	NA	NA	NA	NA	NA	NA	NA	NA	NA	NA	NA	NA	NA	NA	NA	NA
AAACGGCGGCCATCCTCGGGTCTCATCACCC	4	AAACGGCGGCCATCCTCGGGTCTCATCACCCTGC	34	0.0330561980785616	71.754348	1.403333	-5.676137	T	144	chr14	78190029	78190045	NA	17S17M	0	0	0	1	0	17	F	T	0.5	0.941176470588235	1	1	F	NA	ENSG00000021645	NRXN3	+	protein_coding	NA	NA	NA	NA	NA	NA	NA	NA	NA	NA	NA	NA	F	T
CGAGGCCGAGCTGCTTCTTCATGCGCTCGAC	19	ATCGGATCGTCGAGGCCGAGCTGCTTCTTCATGCGCTCGACCACCTGCG	49	0	17.712609	1	-4.146705	F	NA	NA	NA	NA	NA	NA	NA	NA	NA	NA	NA	NA	NA	NA	NA	NA	NA	NA	F	NA	NA	NA	NA	NA	NA	NA	NA	NA	NA	NA	NA	NA	NA	NA	NA	NA	NA	NA
CGATCGATTCCATCAGCGACACCAACTGACG	9	CGATCGATTCCATCAGCGACACCAACTGACGCTGCACGG	39	0.0292061009648741	8.848261	1	-3.145394	F	NA	NA	NA	NA	NA	NA	NA	NA	NA	NA	NA	NA	NA	NA	NA	NA	NA	NA	F	NA	NA	NA	NA	NA	NA	NA	NA	NA	NA	NA	NA	NA	NA	NA	NA	NA	NA	NA
CCTTCTTCGCCGTTACATAGACCGAGATGCC	16	TGCGGATTTTCCTTCTTCGCCGTTACATAGACCGAGATGCCGTTCA	46	0.0301661349912434	1	11.409	3.5121	F	NA	NA	NA	NA	NA	NA	NA	NA	NA	NA	NA	NA	NA	NA	NA	NA	NA	NA	F	NA	NA	NA	NA	NA	NA	NA	NA	NA	NA	NA	NA	NA	NA	NA	NA	NA	NA	NA
AGTGCCGGGGGTCGGCGAGGTCACGGTCAGC	58	GGTTGAGCGCGATGCGCACCGCCGGCTGGTCGGCGCCGCTGACCGTGACCTCGCCGACCCCCGGCACTTGCGAGATGCGTTGCGCCAG	88	0.00628985007746395	40.580435	1	-5.342712	F	NA	NA	NA	NA	NA	NA	NA	NA	NA	NA	NA	NA	NA	NA	NA	NA	NA	NA	F	NA	NA	NA	NA	NA	NA	NA	NA	NA	NA	NA	NA	NA	NA	NA	NA	NA	NA	NA
CGAAGATCGCGACCAGGTCGACCGCCTCCAG	4	GCTGGAGGCGGTCGACCTGGTCGCGATCTTCGAGGAGGAAACCCCGA	47	0.0391238350171107	30.234783	2.125	-3.830674	F	NA	NA	NA	NA	NA	NA	NA	NA	NA	NA	NA	NA	NA	NA	NA	NA	NA	NA	F	NA	NA	NA	NA	NA	NA	NA	NA	NA	NA	NA	NA	NA	NA	NA	NA	NA	NA	NA
GCCCAGCCCGATGGTGCGGGTCGCCGGAGCC	54	GAATTATGTCGGCCGTGACGCCTATCTGCCCAGCCCGATGGTGCGGGTCGCCGGAGCCACGGATGTTGCGGCGCCGACCTACGGCG	86	0.0227464519005559	1	6.868333	2.77996	F	NA	NA	NA	NA	NA	NA	NA	NA	NA	NA	NA	NA	NA	NA	NA	NA	NA	NA	F	NA	NA	NA	NA	NA	NA	NA	NA	NA	NA	NA	NA	NA	NA	NA	NA	NA	NA	NA
CGCACCACGATCACCGAATCGCTAGCAGCTC	45	CGCTTCGCACCACGATCACCGAATCGCTAGCAGCTCACGAGTCGGTGGGCGCTAGTGCCACCTGGGTACTTGGTA	75	0.0168189712473396	45.603913	1	-5.511086	F	NA	NA	NA	NA	NA	NA	NA	NA	NA	NA	NA	NA	NA	NA	NA	NA	NA	NA	F	NA	NA	NA	NA	NA	NA	NA	NA	NA	NA	NA	NA	NA	NA	NA	NA	NA	NA	NA
TGTGGTGATTTAGAGGGTGAACTCACTGGAA	1	TGTGGTGATTTAGAGGGTGAACTCACTGGAA	31	0.0497441966017087	1.128261	3.514667	1.639287	T	20756	chr2	148881728	148881758	NA	31M	0	0	0	1	0	0	F	F	1	0.967741935483871	2	1	F	NA	ENSG00000231079	AC105402.3	-	lncRNA	NA	NA	NA	NA	NA	NA	NA	NA	NA	NA	NA	NA	F	T
CACCACGATCAAGGATCCCTTCGTCGATTAC	7	GCACCACGATCAAGGATCCCTTCGTCGATTACGCGAC	37	0.0373473296494903	1	4.567	2.191247	T	8818	chr2	238831719	238831736	NA	19S18M	0	0	0	2	0	19	F	T	0.486486486486487	0.888888888888889	1	2	F	NA	NA	NA	NA	NA	NA	NA	NA	NA	ENSG00000226992	-	AC145625.1	42004	ENSG00000233608	+	TWIST2	16295	NA	NA
GCAAAGAACAGGATCAACGCCAGGATATAGA	12	CGGCAAAGAACAGGATCAACGCCAGGATATAGACGAACCAAG	42	0.0377451288264647	20.91087	1.026	-4.34915	F	NA	NA	NA	NA	NA	NA	NA	NA	NA	NA	NA	NA	NA	NA	NA	NA	NA	NA	F	NA	NA	NA	NA	NA	NA	NA	NA	NA	NA	NA	NA	NA	NA	NA	NA	NA	NA	NA
ATGTTTCCCCGCCAGGACAGAGGGCAACACA	31	ACCCACCTGTGTGTTGCCCTCTGTCCTGGCGGGGAAACATACACCCCTTGTCTCACCACCA	61	0.0047321561601052	14.63913	1	-3.871758	T	8157	chr19	10692086	10692146	NA	61M	0	0	0	1	0	0	F	F	1	0.983606557377049	1	1	F	NA	ENSG00000129351	ILF3	+	protein_coding	NA	NA	NA	NA	NA	NA	NA	NA	NA	NA	NA	NA	T	F
AGCCGGCATTGTTGACCAAGAGCCAGATCGG	7	GTCCCAGCCGGCATTGTTGACCAAGAGCCAGATCGGA	37	0.0481496637801371	1	5.267	2.396981	T	4799	chr4	113517491	113517513	NA	23M14S	0	0	0	3	14	0	T	F	0.621621621621622	0.869565217391304	1	3	F	NA	ENSG00000145349	CAMK2D	-	protein_coding	NA	NA	NA	NA	NA	NA	NA	NA	NA	NA	NA	NA	F	T
ACCGCGCGCCGCTGGAGATTGTGCGCAGCAG	17	GCTGCTGCGCACAATCTCCAGCGGCGCGCGGTCGACCCACGGTGTTT	47	0.0334668456341655	50.755652	2.495	-4.346457	F	NA	NA	NA	NA	NA	NA	NA	NA	NA	NA	NA	NA	NA	NA	NA	NA	NA	NA	F	NA	NA	NA	NA	NA	NA	NA	NA	NA	NA	NA	NA	NA	NA	NA	NA	NA	NA	NA
CAGCGCCATACCCTCGCCCTGCCAATGGCCG	22	GACGGCCTCGACCAGCGCCATACCCTCGCCCTGCCAATGGCCGACCCCCAAT	52	0.0182484439931318	28.824783	1	-4.849238	F	NA	NA	NA	NA	NA	NA	NA	NA	NA	NA	NA	NA	NA	NA	NA	NA	NA	NA	F	NA	NA	NA	NA	NA	NA	NA	NA	NA	NA	NA	NA	NA	NA	NA	NA	NA	NA	NA
CGGGGCACGCTGACTGCCCGGTTTGAGAAGC	6	ACCGGGGCACGCTGACTGCCCGGTTTGAGAAGCTGC	36	0.0339212456671403	62.398261	1	-5.963434	F	NA	NA	NA	NA	NA	NA	NA	NA	NA	NA	NA	NA	NA	NA	NA	NA	NA	NA	F	NA	NA	NA	NA	NA	NA	NA	NA	NA	NA	NA	NA	NA	NA	NA	NA	NA	NA	NA
GCTGCGGCCGGAGGTTAGATAGACCGACCGA	10	GGCTGCGGCCGGAGGTTAGATAGACCGACCGAACCGGCAC	40	0.0305566514518192	17.275217	1	-4.110632	F	NA	NA	NA	NA	NA	NA	NA	NA	NA	NA	NA	NA	NA	NA	NA	NA	NA	NA	F	NA	NA	NA	NA	NA	NA	NA	NA	NA	NA	NA	NA	NA	NA	NA	NA	NA	NA	NA
CTGGCCTCTGGCTAGCTATCCATAGAGCAAC	15	TTCCGTTGCTCTATGGATAGCTAGCCAGAGGCCAGTAATACACAG	45	0.0402825507203468	1	13.481	3.752856	F	NA	NA	NA	NA	NA	NA	NA	NA	NA	NA	NA	NA	NA	NA	NA	NA	NA	NA	F	NA	NA	NA	NA	NA	NA	NA	NA	NA	NA	NA	NA	NA	NA	NA	NA	NA	NA	NA
ATCTTGAGGCCCAGCGCGTGCACGTCGTTGA	4	GTCAACGACGTGCACGCGCTGGGCCTCAAGATCG	34	0.0494322623422866	4.816522	1	-2.267992	F	NA	NA	NA	NA	NA	NA	NA	NA	NA	NA	NA	NA	NA	NA	NA	NA	NA	NA	F	NA	NA	NA	NA	NA	NA	NA	NA	NA	NA	NA	NA	NA	NA	NA	NA	NA	NA	NA
CGCCTGGGAAATCCTGGAGTGGATTCCGAAG	59	CGGGGCAGGTAGAAGCCGAGGAATGACTGCCGCGCCGGCCATTCCTTCCACTTGTCGCTCTTCGGAATCCACTCCAGGATTTCCCAGGCGCCGGTCAGCG	100	0.0105219561403509	59.617826	1.048667	-5.829115	F	NA	NA	NA	NA	NA	NA	NA	NA	NA	NA	NA	NA	NA	NA	NA	NA	NA	NA	F	NA	NA	NA	NA	NA	NA	NA	NA	NA	NA	NA	NA	NA	NA	NA	NA	NA	NA	NA
GCTCTCAGGCCCAGCCCCAGTCCGGCGAAGC	2	GCTCTCAGGCCCAGCCCCAGTCCGGCGAAGCT	32	0.0301661349912434	38.682174	3.968	-3.285185	T	18541	chr1	155251675	155251692	NA	5S18M9S	0	0	0	0	9	5	T	T	0.5625	1	2	0	F	NA	ENSG00000160767	FAM189B	-	protein_coding	NA	NA	NA	NA	NA	NA	NA	NA	NA	NA	NA	NA	T	F
CGACAACAGGAAAGTTTCATGACACGCGTGC	14	AACGACAACAGGAAAGTTTCATGACACGCGTGCGCTGTATCACTG	45	0.0455193600974824	9.503478	2.219	-2.098546	F	NA	NA	NA	NA	NA	NA	NA	NA	NA	NA	NA	NA	NA	NA	NA	NA	NA	NA	F	NA	NA	NA	NA	NA	NA	NA	NA	NA	NA	NA	NA	NA	NA	NA	NA	NA	NA	NA
GGCTTAAGTTCTCCGCTTCGCCGAAGCTAAC	13	GTTAGCTTCGGCGAAGCGGAGAACTTAAGCCCCAGTAAACGGC	43	0.0116438008749242	71.697391	6.406333	-3.48435	F	NA	NA	NA	NA	NA	NA	NA	NA	NA	NA	NA	NA	NA	NA	NA	NA	NA	NA	F	NA	NA	NA	NA	NA	NA	NA	NA	NA	NA	NA	NA	NA	NA	NA	NA	NA	NA	NA
GCTCGCCGGCATCGCGGGGGCCCGAGCCCCC	18	GGTCGTCCGCGCTCGCCGGCATCGCGGGGGCCCGAGCCCCCGATCCGC	48	0.0438424600170693	21.407826	1	-4.420066	F	NA	NA	NA	NA	NA	NA	NA	NA	NA	NA	NA	NA	NA	NA	NA	NA	NA	NA	F	NA	NA	NA	NA	NA	NA	NA	NA	NA	NA	NA	NA	NA	NA	NA	NA	NA	NA	NA
ACGGGGCCTCGGGCGATAACCAGGTCGGCCC	22	CCCCCGTTGGCACGCCCGGGCCGACCTGGTTATCGCCCGAGGCCCCGTCGCT	52	0.00764471141206931	1	9.725	3.281698	F	NA	NA	NA	NA	NA	NA	NA	NA	NA	NA	NA	NA	NA	NA	NA	NA	NA	NA	F	NA	NA	NA	NA	NA	NA	NA	NA	NA	NA	NA	NA	NA	NA	NA	NA	NA	NA	NA
CGACGATGGTCACGCCGGACTTGGCGGAGGC	9	CAGCCTCCGCCAAGTCCGGCGTGACCATCGTCGACGCGC	39	0.0246915517805618	1	6.793667	2.764191	F	NA	NA	NA	NA	NA	NA	NA	NA	NA	NA	NA	NA	NA	NA	NA	NA	NA	NA	F	NA	NA	NA	NA	NA	NA	NA	NA	NA	NA	NA	NA	NA	NA	NA	NA	NA	NA	NA
CTTCGTCCTCGCTGCGCTCCCCGCTCAGAAG	79	CGGGGTGCGGTCCATTGGATCGACGGCCCGGACGAGAACGCCAAGGCGATCGATCTCAAGCCGCTTCTGAGCGGGGAGCGCAGCGAGGACGAAGGTCTGTTCGTACGCC	109	0	20.161304	1	-4.333517	F	NA	NA	NA	NA	NA	NA	NA	NA	NA	NA	NA	NA	NA	NA	NA	NA	NA	NA	F	NA	NA	NA	NA	NA	NA	NA	NA	NA	NA	NA	NA	NA	NA	NA	NA	NA	NA	NA
ACGGCACCTTGGCCGCGATCCCGTTCGAGCT	2	GACGGCACCTTGGCCGCGATCCCGTTCGAGCT	32	0.0460804277647942	30.101739	1	-4.911775	T	3216	chr1	76699878	76699895	NA	14S18M	0	0	0	1	0	14	F	T	0.5625	0.944444444444444	1	1	F	NA	ENSG00000226415	TPI1P1	+	processed_pseudogene	NA	NA	NA	NA	NA	NA	NA	NA	NA	NA	NA	NA	T	F
GGCTATGAGGGCGGCTACTGGCGCGGCGGCA	2	CGGCTATGAGGGCGGCTACTGGCGCGGCGGCA	32	0.0443769385995108	14.103043	1.052	-3.7448	F	NA	NA	NA	NA	NA	NA	NA	NA	NA	NA	NA	NA	NA	NA	NA	NA	NA	NA	F	NA	NA	NA	NA	NA	NA	NA	NA	NA	NA	NA	NA	NA	NA	NA	NA	NA	NA	NA
CAGATTGCCCAGGATGAGGGCGCCCGGGTTA	12	CGAAACAATAACCCGGGCGCCCTCATCCTGGGCAATCTGGGC	42	0.0407009500823277	90.433043	3.642	-4.634047	F	NA	NA	NA	NA	NA	NA	NA	NA	NA	NA	NA	NA	NA	NA	NA	NA	NA	NA	F	NA	NA	NA	NA	NA	NA	NA	NA	NA	NA	NA	NA	NA	NA	NA	NA	NA	NA	NA
GCTCGTAGGGGTTATGTACGTCATTGGCTAC	5	ACCAGCTCGTAGGGGTTATGTACGTCATTGGCTAC	35	0.0458285303139723	52.231304	6.812333	-2.938694	F	NA	NA	NA	NA	NA	NA	NA	NA	NA	NA	NA	NA	NA	NA	NA	NA	NA	NA	F	NA	NA	NA	NA	NA	NA	NA	NA	NA	NA	NA	NA	NA	NA	NA	NA	NA	NA	NA
CCAGGCCTCTGAGCACTGACGACGCCCGCGC	10	GCCCTGACGCCAGGCCTCTGAGCACTGACGACGCCCGCGC	40	0.0211122272104866	44.406087	8.185667	-2.439586	F	NA	NA	NA	NA	NA	NA	NA	NA	NA	NA	NA	NA	NA	NA	NA	NA	NA	NA	F	NA	NA	NA	NA	NA	NA	NA	NA	NA	NA	NA	NA	NA	NA	NA	NA	NA	NA	NA
ACATCCCAAGATCGACCCGGTCACCGGCGAC	58	GCCGAAGAACACCATGTCGCCGGTGACCGGGTCGATCTTGGGATGTGCGGAGAACGGGCCCGAAATCGCGCCCTTGTAGTCGCAATAG	88	0.00436579799818016	30.318696	1.125	-4.752211	F	NA	NA	NA	NA	NA	NA	NA	NA	NA	NA	NA	NA	NA	NA	NA	NA	NA	NA	F	NA	NA	NA	NA	NA	NA	NA	NA	NA	NA	NA	NA	NA	NA	NA	NA	NA	NA	NA
AGCGGCTGACCTCGATCGGCCTGCGCCCGAT	39	CCGTCGCCGGAATGGCTGCAGAAGCGGCTGACCTCGATCGGCCTGCGCCCGATCAACGCGCTGGTCGAC	69	0.0211861989788878	52.198261	3.554667	-3.876215	F	NA	NA	NA	NA	NA	NA	NA	NA	NA	NA	NA	NA	NA	NA	NA	NA	NA	NA	F	NA	NA	NA	NA	NA	NA	NA	NA	NA	NA	NA	NA	NA	NA	NA	NA	NA	NA	NA
AGGGATAAACGCTGAAGGCATCTAAGCGTGA	21	GTAGCCAAGCCCGGAAGGGATAAACGCTGAAGGCATCTAAGCGTGAAGCCCCCCTCAAGATGAGATATCC	70	0.00169152547153182	102.431304	1.317	-6.281258	F	NA	NA	NA	NA	NA	NA	NA	NA	NA	NA	NA	NA	NA	NA	NA	NA	NA	NA	F	NA	NA	NA	NA	NA	NA	NA	NA	NA	NA	NA	NA	NA	NA	NA	NA	NA	NA	NA
GGCGCGCCGGAATCGACCGTGATGGATGAGA	5	CGGCGCGCCGGAATCGACCGTGATGGATGAGAGCT	35	0.0374602982868894	39.133043	1.714333	-4.512668	F	NA	NA	NA	NA	NA	NA	NA	NA	NA	NA	NA	NA	NA	NA	NA	NA	NA	NA	F	NA	NA	NA	NA	NA	NA	NA	NA	NA	NA	NA	NA	NA	NA	NA	NA	NA	NA	NA
CCGACCGCCGCGTGTCCTTCGTGCAGGACCG	1	CCGACCGCCGCGTGTCCTTCGTGCAGGACCG	31	0.0226388866876057	24.128261	1.850667	-3.704607	T	10908	chr7	94384479	94384495	NA	17M14S	0	0	0	1	14	0	T	F	0.548387096774194	0.941176470588235	1	1	F	NA	ENSG00000285090	AC002074.1	-	lncRNA	NA	NA	NA	NA	NA	NA	NA	NA	NA	NA	NA	NA	F	T
GCAGGGGCCATCAATTTCATCACAACAATTA	13	ATTGGGTTATGGCAGGGGCCATCAATTTCATCACAACAATTAT	43	0.0362876086731115	5.108261	1	-2.352832	T	17450	chrM	6382	6409	NA	15S28M	0	0	0	0	0	15	F	T	0.651162790697674	1	1	0	F	NA	ENSG00000198804	MT-CO1	+	protein_coding	NA	NA	NA	NA	NA	NA	NA	NA	NA	NA	NA	NA	T	F
GATTACGGCCGCTATGCGCTGCCCTACGATA	4	CGTATCGTAGGGCAGCGCATAGCGGCCGTAATCG	34	0.0408082770695841	12.98913	2.475667	-2.391416	F	NA	NA	NA	NA	NA	NA	NA	NA	NA	NA	NA	NA	NA	NA	NA	NA	NA	NA	F	NA	NA	NA	NA	NA	NA	NA	NA	NA	NA	NA	NA	NA	NA	NA	NA	NA	NA	NA
AACCCATGATGCGCTCGTCGGCCTCACCGAT	6	GATCGGTGAGGCCGACGAGCGCATCATGGGTTGAAA	36	0.036739625772286	7.521739	1.664	-2.176411	F	NA	NA	NA	NA	NA	NA	NA	NA	NA	NA	NA	NA	NA	NA	NA	NA	NA	NA	F	NA	NA	NA	NA	NA	NA	NA	NA	NA	NA	NA	NA	NA	NA	NA	NA	NA	NA	NA
CCTCCTGGCCGGTGTAGATCACGTTCTTGGA	4	AGTCCAAGAACGTGATCTACACCGGCCAGGAGGC	34	0.031971157213509	1.156957	7.376	2.672503	F	NA	NA	NA	NA	NA	NA	NA	NA	NA	NA	NA	NA	NA	NA	NA	NA	NA	NA	F	NA	NA	NA	NA	NA	NA	NA	NA	NA	NA	NA	NA	NA	NA	NA	NA	NA	NA	NA
ACCGCGCCTGCGGACAACAAGACATTGGCGG	6	CCGCCAATGTCTTGTTGTCCGCAGGCGCGGTTCCCG	36	0.0374602982868894	72.693478	1	-6.183754	F	NA	NA	NA	NA	NA	NA	NA	NA	NA	NA	NA	NA	NA	NA	NA	NA	NA	NA	F	NA	NA	NA	NA	NA	NA	NA	NA	NA	NA	NA	NA	NA	NA	NA	NA	NA	NA	NA
AGATGCAGGATTTCTTCACTCCTCCCCTTTG	17	CCAGAGGCTCTTGAAGTCACAAAGGGGAGGAGTGAAGAAATCCTGCATCTCAGTCCCTCAC	61	0.0171611785315097	1.063913	17.367333	4.028924	T	4392	chr6	31354219	31354279	NA	61M	0	0	0	1	0	0	F	F	1	0.983606557377049	5	1	F	NA	ENSG00000234745	HLA-B	-	protein_coding	NA	NA	NA	NA	NA	NA	NA	NA	NA	NA	NA	NA	T	F
CCGTTTTGTCGCGATCAATTTCCACAAGCCG	17	ATCGCCAACCGTTTTGTCGCGATCAATTTCCACAAGCCGAGTGTCGA	47	0.0412126915036293	27.225652	1	-4.766895	F	NA	NA	NA	NA	NA	NA	NA	NA	NA	NA	NA	NA	NA	NA	NA	NA	NA	NA	F	NA	NA	NA	NA	NA	NA	NA	NA	NA	NA	NA	NA	NA	NA	NA	NA	NA	NA	NA
AGGGAAGACGCCCCCGCAGTGGCCTGTTCGG	4	CCGCCGAACAGGCCACTGCGGGGGCGTCTTCCCT	34	0.0368617676660927	40.039565	1	-5.323354	T	5731	chr10	6185452	6185471	NA	6S20M8S	0	0	0	0	8	6	T	T	0.588235294117647	1	1	0	F	NA	ENSG00000170525	PFKFB3	+	protein_coding	NA	NA	NA	NA	NA	NA	NA	NA	NA	NA	NA	NA	F	T
AGCTAGGCCTTCCTCGGAGGCCCGACCCCCT	3	GCAGCTAGGCCTTCCTCGGAGGCCCGACCCCCT	33	0.0290772339076602	8.224783	1	-3.039978	T	5116	KI270847.1	1507147	1507179	NA	33M	0	0	0	1	0	0	F	F	1	0.96969696969697	1	1	F	NA	NA	NA	NA	NA	NA	NA	NA	NA	NA	NA	NA	NA	NA	NA	NA	NA	NA	NA
CGGGTGAAGCTGGCCATCGAATTCGTTGAGC	24	CCGTCCGACGATCGCTCAACGAATTCGATGGCCAGCTTCACCCGGCAGCCGGAT	54	0.00573658027233477	24.028696	1.897	-3.662967	F	NA	NA	NA	NA	NA	NA	NA	NA	NA	NA	NA	NA	NA	NA	NA	NA	NA	NA	F	NA	NA	NA	NA	NA	NA	NA	NA	NA	NA	NA	NA	NA	NA	NA	NA	NA	NA	NA
AGCTTCAGCAGCTCGTCCGGCTTCAGCGACG	10	CGGACCGTCGCTGAAGCCGGACGAGCTGCTGAAGCTGATCGATATCCTCAA	51	0.0368839221538772	21.865652	1.499667	-3.865952	F	NA	NA	NA	NA	NA	NA	NA	NA	NA	NA	NA	NA	NA	NA	NA	NA	NA	NA	F	NA	NA	NA	NA	NA	NA	NA	NA	NA	NA	NA	NA	NA	NA	NA	NA	NA	NA	NA
CCAGATCAGCTTGTTGAAGTCGTGCCGGTTC	13	AGAACCGGCACGACTTCAACAAGCTGATCTGGCAACTCGCCTC	43	0.0423017907012293	53.54913	2.471667	-4.437307	F	NA	NA	NA	NA	NA	NA	NA	NA	NA	NA	NA	NA	NA	NA	NA	NA	NA	NA	F	NA	NA	NA	NA	NA	NA	NA	NA	NA	NA	NA	NA	NA	NA	NA	NA	NA	NA	NA
AGGGCCTCACCCTCGACGTCCTCGGCAATGA	5	GCCAGGGCCTCACCCTCGACGTCCTCGGCAATGAC	35	0.0239770155096968	53.075652	1.874333	-4.823601	F	NA	NA	NA	NA	NA	NA	NA	NA	NA	NA	NA	NA	NA	NA	NA	NA	NA	NA	F	NA	NA	NA	NA	NA	NA	NA	NA	NA	NA	NA	NA	NA	NA	NA	NA	NA	NA	NA
AGCTGAAGAACAGGATTGCGGTGTTGATGGG	44	CAGCGCCGGTCGAGACGTCGCCATCGAAAATCAGACGCTCGGCTGCACGCCCGCCCATCAACACCGCAATCCTGTTCTTCAGCTCGCTGATGGTGAGGAGAAACCTGTCTT	111	0.0163482848156561	30.594783	1.125667	-4.764434	F	NA	NA	NA	NA	NA	NA	NA	NA	NA	NA	NA	NA	NA	NA	NA	NA	NA	NA	F	NA	NA	NA	NA	NA	NA	NA	NA	NA	NA	NA	NA	NA	NA	NA	NA	NA	NA	NA
AGTCCAGATTCTTCAGCCGCCGCTCGGCGCG	8	GATCGCGCCGAGCGGCGGCTGAAGAATCTGGACTACTT	38	0.0250793719743045	1	9.388	3.230818	F	NA	NA	NA	NA	NA	NA	NA	NA	NA	NA	NA	NA	NA	NA	NA	NA	NA	NA	F	NA	NA	NA	NA	NA	NA	NA	NA	NA	NA	NA	NA	NA	NA	NA	NA	NA	NA	NA
CAGGCATCACGATGGCTAGTCCTACAAAAAA	58	GTGGCGTGCCCAAGCACAGGCATCACGATGGCTAGTCCTACAAAAAACGGTAGGGAGCCGATGACAAGCGCGGCGGCAACAATGGAGC	88	0.00436579799818016	22.200435	1	-4.472516	F	NA	NA	NA	NA	NA	NA	NA	NA	NA	NA	NA	NA	NA	NA	NA	NA	NA	NA	F	NA	NA	NA	NA	NA	NA	NA	NA	NA	NA	NA	NA	NA	NA	NA	NA	NA	NA	NA
CAGATCTACACCCTAGCCTACACTCTTTCCC	1	CAGATCTACACCCTAGCCTACACTCTTTCCC	31	0.0300651659303328	84.444348	1.224	-6.108325	T	9093	chrX	71372682	71372698	NA	17M14S	0	0	0	1	14	0	T	F	0.548387096774194	0.941176470588235	1	1	F	NA	ENSG00000147133	TAF1	+	protein_coding	NA	NA	NA	NA	NA	NA	NA	NA	NA	NA	NA	NA	F	T
GACAGCGTTTCGGGGGTGGGGCTGAGCCAGA	12	GCCGCCGCCATCTGGCTCAGCCCCACCCCCGAAACGCTGTCC	42	0.0437148972932646	12.921739	1.083333	-3.576252	F	NA	NA	NA	NA	NA	NA	NA	NA	NA	NA	NA	NA	NA	NA	NA	NA	NA	NA	F	NA	NA	NA	NA	NA	NA	NA	NA	NA	NA	NA	NA	NA	NA	NA	NA	NA	NA	NA
CAATGACAGGGCAATGTAGAGCAGGACCGGA	3	ACAATGACAGGGCAATGTAGAGCAGGACCGGAT	33	0.0375068584385384	9.384783	1.532	-2.614907	T	8679	chr11	76259454	76259471	NA	18M15S	0	0	0	0	15	0	T	F	0.545454545454545	1	1	0	F	NA	NA	NA	NA	NA	NA	NA	NA	NA	ENSG00000255362	-	AP000785.2	43430	ENSG00000137492	-	THAP12	90484	NA	NA
CAGCTTGGCGAACTTCATGCGATCGACTTCA	9	CCAGCTTGGCGAACTTCATGCGATCGACTTCAGGCGTTC	39	0.0475514130675255	37.776522	2.078333	-4.183991	F	NA	NA	NA	NA	NA	NA	NA	NA	NA	NA	NA	NA	NA	NA	NA	NA	NA	NA	F	NA	NA	NA	NA	NA	NA	NA	NA	NA	NA	NA	NA	NA	NA	NA	NA	NA	NA	NA
CTCACCAGCGCGGCAGACTATCCCGCATCGC	5	CTCACCAGCGCGGCAGACTATCCCGCATCGCCGGT	35	0.0345308819997614	16.513913	2.674	-2.626611	F	NA	NA	NA	NA	NA	NA	NA	NA	NA	NA	NA	NA	NA	NA	NA	NA	NA	NA	F	NA	NA	NA	NA	NA	NA	NA	NA	NA	NA	NA	NA	NA	NA	NA	NA	NA	NA	NA
AAATGCAAATTTTATTTACGAGAGAAAATGC	13	AAATGCAAATTTTATTTACGAGAGAAAATGCGCTCTCGGCATG	43	0.0329918754898336	28.055652	1.857	-3.917246	F	NA	NA	NA	NA	NA	NA	NA	NA	NA	NA	NA	NA	NA	NA	NA	NA	NA	NA	F	NA	NA	NA	NA	NA	NA	NA	NA	NA	NA	NA	NA	NA	NA	NA	NA	NA	NA	NA
GACGATCGGCTTCACGCCGGGCTGGAACACA	23	ATTGTTGAGATAGGTGACGATCGGCTTCACGCCGGGCTGGAACACATCCGAGCAATTGCTCCAGTT	66	0.0230965533366342	28.793043	1.739333	-4.049114	F	NA	NA	NA	NA	NA	NA	NA	NA	NA	NA	NA	NA	NA	NA	NA	NA	NA	NA	F	NA	NA	NA	NA	NA	NA	NA	NA	NA	NA	NA	NA	NA	NA	NA	NA	NA	NA	NA
CGCCAAAGCCTCGATTTGACGACGTTTGCGC	2	CGCCAAAGCCTCGATTTGACGACGTTTGCGCG	32	0.0170905051894614	19.142609	1	-4.258716	T	13607	chr3	78505302	78505318	NA	17M15S	0	0	0	1	15	0	T	F	0.53125	0.941176470588235	1	1	F	NA	NA	NA	NA	NA	NA	NA	NA	NA	ENSG00000240241	+	AC108752.1	210572	ENSG00000239226	+	MRPS17P3	19782	NA	NA
AGGTCGAGGATCTCGTCGGCAAGTCGGTGGC	31	CTCCGGTATCAACAAGGTCGAGGATCTCGTCGGCAAGTCGGTGGCCGTGAACCGCTCCGGT	61	0.00714407529912257	13.54	1	-3.759156	F	NA	NA	NA	NA	NA	NA	NA	NA	NA	NA	NA	NA	NA	NA	NA	NA	NA	NA	F	NA	NA	NA	NA	NA	NA	NA	NA	NA	NA	NA	NA	NA	NA	NA	NA	NA	NA	NA
CCGAGCCCAGAATGCCGTCCTGGCTGCCCGC	21	CCCTTGATCACGGCCGAGCCCAGAATGCCGTCCTGGCTGCCCGCGACCTCGATGTTGAG	59	0.0469592917417063	1	5.205667	2.380083	F	NA	NA	NA	NA	NA	NA	NA	NA	NA	NA	NA	NA	NA	NA	NA	NA	NA	NA	F	NA	NA	NA	NA	NA	NA	NA	NA	NA	NA	NA	NA	NA	NA	NA	NA	NA	NA	NA
AACCGACCACTCGATCCCGACGTCGCCGACG	2	CAACCGACCACTCGATCCCGACGTCGCCGACG	32	0.0448124055931568	27.635217	2.138	-3.692174	T	611	chr10	125896329	125896344	NA	16M16S	0	0	0	1	16	0	T	F	0.5	0.9375	1	1	F	NA	ENSG00000089876	DHX32	-	protein_coding	NA	NA	NA	NA	NA	NA	NA	NA	NA	NA	NA	NA	T	F
CGAAGACGTAAGGATTGACCGACGACGCCCC	5	GAGCCGGGATCGAAGACGTAAGGATTGACCGACGACGCCCC	41	0.0364947000247112	46.568696	3.025333	-3.944195	F	NA	NA	NA	NA	NA	NA	NA	NA	NA	NA	NA	NA	NA	NA	NA	NA	NA	NA	F	NA	NA	NA	NA	NA	NA	NA	NA	NA	NA	NA	NA	NA	NA	NA	NA	NA	NA	NA
ATCGCATCGGCATAGCTCTCGACCTCGATGA	12	GTGATCGCGATCATCGAGGTCGAGAGCTATGCCGATGCGATC	42	0.0152788404942966	49.572609	3.168	-3.967899	F	NA	NA	NA	NA	NA	NA	NA	NA	NA	NA	NA	NA	NA	NA	NA	NA	NA	NA	F	NA	NA	NA	NA	NA	NA	NA	NA	NA	NA	NA	NA	NA	NA	NA	NA	NA	NA	NA
CAACGGGCCGATCGCCGACGTCGTGCTGGTC	1	CAACGGGCCGATCGCCGACGTCGTGCTGGTC	31	0.0481496637801371	1	5.780333	2.531153	F	NA	NA	NA	NA	NA	NA	NA	NA	NA	NA	NA	NA	NA	NA	NA	NA	NA	NA	F	NA	NA	NA	NA	NA	NA	NA	NA	NA	NA	NA	NA	NA	NA	NA	NA	NA	NA	NA
CCCGTTCTGCGCAGTGATCTCGGTGCCGTCG	13	CGCCCGTTCTGCGCAGTGATCTCGGTGCCGTCGGCGGCCGTTCCGACCAC	50	0.0349715204673072	94.875217	1	-6.567959	F	NA	NA	NA	NA	NA	NA	NA	NA	NA	NA	NA	NA	NA	NA	NA	NA	NA	NA	F	NA	NA	NA	NA	NA	NA	NA	NA	NA	NA	NA	NA	NA	NA	NA	NA	NA	NA	NA
ATCTGACATCGGCCGCTCCAATAGCGCGAGG	5	CCTAATCTGACATCGGCCGCTCCAATAGCGCGAGG	35	0.0279047458128578	19.809565	1	-4.308125	F	NA	NA	NA	NA	NA	NA	NA	NA	NA	NA	NA	NA	NA	NA	NA	NA	NA	NA	F	NA	NA	NA	NA	NA	NA	NA	NA	NA	NA	NA	NA	NA	NA	NA	NA	NA	NA	NA
CGAAGTTCCTCTTTTTGTAGTTCCTGCGGCG	31	GTATTAGAATTGGAAATCCGCTACGACGAAGTTCCTCTTTTTGTAGTTCCTGCGGCGAGTA	61	0.0128724813197477	35.771304	1	-5.160731	F	NA	NA	NA	NA	NA	NA	NA	NA	NA	NA	NA	NA	NA	NA	NA	NA	NA	NA	F	NA	NA	NA	NA	NA	NA	NA	NA	NA	NA	NA	NA	NA	NA	NA	NA	NA	NA	NA
CATCCATTTCAATTTCATGATAATTGCATTC	15	AATTGAAACGAATGCAATTATCATGAAATTGAAATGGATGGACTC	45	0.0332138325180106	77.911304	1	-6.283761	T	9646	chr1	125167567	125167611	NA	45M	0	0	0	1	0	0	F	F	1	0.977777777777778	18	1	F	NA	NA	NA	NA	NA	NA	NA	NA	NA	ENSG00000224857	-	LINC01691	3587044	ENSG00000276118	+	AC242852.1	18175568	NA	NA
CCTTGATTGCATCATAGTTCGAGCTCACTTC	5	GCGAAGTGAGCTCGAACTATGATGCAATCAAGGCG	35	0.0307489060882425	1	6.464667	2.692576	F	NA	NA	NA	NA	NA	NA	NA	NA	NA	NA	NA	NA	NA	NA	NA	NA	NA	NA	F	NA	NA	NA	NA	NA	NA	NA	NA	NA	NA	NA	NA	NA	NA	NA	NA	NA	NA	NA
GGGGGAGGGGCGTCCTCGCGCGAGAGCTGGA	5	GCGGGGGAGGGGCGTCCTCGCGCGAGAGCTGGACG	35	0.0478626953014704	90.393043	1.876333	-5.590224	T	19253	chr5	179806345	179806363	NA	4S19M12S	0	0	0	0	12	4	T	T	0.542857142857143	1	2	0	F	NA	ENSG00000161013	MGAT4B	-	protein_coding	NA	NA	NA	NA	NA	NA	NA	NA	NA	NA	NA	NA	F	T
GCATCATGGTCACCTGGCATTTCGGCCTCGA	4	ATCGAGGCCGAAATGCCAGGTGACCATGATGCCG	34	0.0496533836536057	20.528696	2.254333	-3.186869	T	17468	chr1	111213985	111214002	NA	5S18M11S	0	0	0	0	11	5	T	T	0.529411764705882	1	2	0	F	NA	ENSG00000064886	CHI3L2	+	protein_coding	NA	NA	NA	NA	NA	NA	NA	NA	NA	NA	NA	NA	F	T
GGAATTCCACGGCATTCCGGCACTCCGCAAC	36	AAGGAGCGCGTGGACCTCGCCGGGCCGGAGGTCGAACGAGATGTTGCGGAGTGCCGGAATGCCGTGGAATTCC	73	0.0401085069812153	57.179565	1.581667	-5.175982	F	NA	NA	NA	NA	NA	NA	NA	NA	NA	NA	NA	NA	NA	NA	NA	NA	NA	NA	F	NA	NA	NA	NA	NA	NA	NA	NA	NA	NA	NA	NA	NA	NA	NA	NA	NA	NA	NA
GCAGGTGAGATGGTTCAAGCGCTTACTGCGC	2	GCAGGTGAGATGGTTCAAGCGCTTACTGCGCG	32	0.0451702990122836	7.05	1	-2.817623	T	17446	chr2	33638773	33638789	NA	15S17M	0	0	0	1	0	15	F	T	0.53125	0.941176470588235	4	1	F	NA	ENSG00000286415	AC017050.1	+	lncRNA	NA	NA	NA	NA	NA	NA	NA	NA	NA	NA	NA	NA	F	T
CGCCGAAGCTAACGGGTCCTCTTAACCTTCC	2	TCGCCGAAGCTAACGGGTCCTCTTAACCTTCC	32	0.0392318380341113	11.226522	1	-3.488839	T	13726	chrY	17006806	17006822	NA	17M15S	0	0	0	0	15	0	T	F	0.53125	1	1	0	F	NA	NA	NA	NA	NA	NA	NA	NA	NA	ENSG00000286201	-	AC011751.1	362268	ENSG00000228518	+	SURF6P1	186003	NA	NA
AAGCTCATCACCCGCGAGGTCGAGAACATCG	44	ATCCTCGCATCCGGTCTCGCGGCGGGCGCGATCTACGCGCTGGTCGGCGTCACCTACAACACGATGTTCTCGACCTCGCGGGTGATGAGCTTCACCGCC	99	0.0279047458128578	3.86913	16.577	2.099102	F	NA	NA	NA	NA	NA	NA	NA	NA	NA	NA	NA	NA	NA	NA	NA	NA	NA	NA	F	NA	NA	NA	NA	NA	NA	NA	NA	NA	NA	NA	NA	NA	NA	NA	NA	NA	NA	NA
CGATCGTGAAGCGCCTCGGCGAGCGCAATGC	9	GCATTGCGCTCGCCGAGGCGCTTCACGATCGGACCGATC	39	0.0352707353535096	1	12.351333	3.626595	F	NA	NA	NA	NA	NA	NA	NA	NA	NA	NA	NA	NA	NA	NA	NA	NA	NA	NA	F	NA	NA	NA	NA	NA	NA	NA	NA	NA	NA	NA	NA	NA	NA	NA	NA	NA	NA	NA
AAGGACCGGCTAATTCCGTGCCAGCAGCCGC	1	AAGGACCGGCTAATTCCGTGCCAGCAGCCGC	31	0.0428846819798174	79.154348	7.014333	-3.496291	T	1110	KI270781.1	41644	41661	NA	9S18M4S	0	0	0	0	4	9	T	T	0.580645161290323	1	1	0	F	NA	NA	NA	NA	NA	NA	NA	NA	NA	NA	NA	NA	NA	NA	NA	NA	NA	NA	NA
ACGAATGCGTCGCGCAGCTGCGTGAGCACAT	25	TTCTGCACGCCCATCGCGATGTGCTCACGCAGCTGCGCGACGCATTCGTCGACCG	55	0.00813605426283561	35.47	2.349333	-3.916276	F	NA	NA	NA	NA	NA	NA	NA	NA	NA	NA	NA	NA	NA	NA	NA	NA	NA	NA	F	NA	NA	NA	NA	NA	NA	NA	NA	NA	NA	NA	NA	NA	NA	NA	NA	NA	NA	NA
AGAACTTCCTTCGCTGGCCGTAGTAGCCACT	31	GAAAAGAGTGGCTACTACGGCCAGCGAAGGAAGTTCTGGTCGTGGGGATATGAAGGTGAAG	61	0.0128724813197477	46.920435	2.638667	-4.152335	F	NA	NA	NA	NA	NA	NA	NA	NA	NA	NA	NA	NA	NA	NA	NA	NA	NA	NA	F	NA	NA	NA	NA	NA	NA	NA	NA	NA	NA	NA	NA	NA	NA	NA	NA	NA	NA	NA
GATCGGGCGCTATGAGGATAAGCCGGCGACC	31	TGTATTGATCAGATCGTTCGCTGCGATCGGGCGCTATGAGGATAAGCCGGCGACCCACGGG	61	0.0161506294623084	1	22.565667	4.496058	F	NA	NA	NA	NA	NA	NA	NA	NA	NA	NA	NA	NA	NA	NA	NA	NA	NA	NA	F	NA	NA	NA	NA	NA	NA	NA	NA	NA	NA	NA	NA	NA	NA	NA	NA	NA	NA	NA
CGCGAAGATCGAGGAGTACCGCAACGCCTTC	1	CGCGAAGATCGAGGAGTACCGCAACGCCTTC	31	0.0453433555478675	121.043913	1.593	-6.24764	F	NA	NA	NA	NA	NA	NA	NA	NA	NA	NA	NA	NA	NA	NA	NA	NA	NA	NA	F	NA	NA	NA	NA	NA	NA	NA	NA	NA	NA	NA	NA	NA	NA	NA	NA	NA	NA	NA
GGCAAGCCGGCATCGACATAAGCATTGACCA	19	GGGCAAGCCGGCATCGACATAAGCATTGACCAGAGCTGCACAACTTGCC	49	0.032118926450876	13.536522	1.519333	-3.155347	F	NA	NA	NA	NA	NA	NA	NA	NA	NA	NA	NA	NA	NA	NA	NA	NA	NA	NA	F	NA	NA	NA	NA	NA	NA	NA	NA	NA	NA	NA	NA	NA	NA	NA	NA	NA	NA	NA
CCCACCCAGATCTACACCCTATCCTACACTC	1	CCCACCCAGATCTACACCCTATCCTACACTC	31	0.0303136655124233	39.07913	1.224	-4.996723	F	NA	NA	NA	NA	NA	NA	NA	NA	NA	NA	NA	NA	NA	NA	NA	NA	NA	NA	F	NA	NA	NA	NA	NA	NA	NA	NA	NA	NA	NA	NA	NA	NA	NA	NA	NA	NA	NA
ATGGCGGATGAGCGCCTTGGTCCGGGCGCGG	17	TTTGCGCCGCGCCCGGACCAAGGCGCTCATCCGCCATGCCCGCGCCG	47	0.0329088655335081	23.015652	4.587333	-2.326888	F	NA	NA	NA	NA	NA	NA	NA	NA	NA	NA	NA	NA	NA	NA	NA	NA	NA	NA	F	NA	NA	NA	NA	NA	NA	NA	NA	NA	NA	NA	NA	NA	NA	NA	NA	NA	NA	NA
GATGCGAACTAGGCGCTCTGTCCTGGCGGCA	24	ATCGGCCGTTGTGTTTCTTGGATGCGAACTAGGCGCTCTGTCCTGGCGGCAGCA	54	0.0264257805065234	37.923043	1	-5.245003	F	NA	NA	NA	NA	NA	NA	NA	NA	NA	NA	NA	NA	NA	NA	NA	NA	NA	NA	F	NA	NA	NA	NA	NA	NA	NA	NA	NA	NA	NA	NA	NA	NA	NA	NA	NA	NA	NA
AAATCATGGGAAATCTCATCTTGAGGTGGGC	6	TCTTACTGATATAAAATCATGGGAAATCTCATCTTGAGGTGGGCTTCA	48	0.0202119753726507	55.081304	1.144667	-5.588563	F	NA	NA	NA	NA	NA	NA	NA	NA	NA	NA	NA	NA	NA	NA	NA	NA	NA	NA	F	NA	NA	NA	NA	NA	NA	NA	NA	NA	NA	NA	NA	NA	NA	NA	NA	NA	NA	NA
ATCGTCACCATCGAGGACGGCATGTCGGAAG	14	CCGATCGTCACCATCGAGGACGGCATGTCGGAAGACGACATGGACGGCT	49	0.00939060452599388	13.714348	1	-3.777614	F	NA	NA	NA	NA	NA	NA	NA	NA	NA	NA	NA	NA	NA	NA	NA	NA	NA	NA	F	NA	NA	NA	NA	NA	NA	NA	NA	NA	NA	NA	NA	NA	NA	NA	NA	NA	NA	NA
CGGCCCCCGGGGACGAGAACGACGCCACCAG	2	GCGGCCCCCGGGGACGAGAACGACGCCACCAG	32	0.0335421485096986	56.751739	1	-5.826593	T	14566	chr5	3596532	3596547	NA	16M16S	0	0	0	0	16	0	T	F	0.5	1	3	0	F	NA	ENSG00000259603	AC016595.1	-	lncRNA	NA	NA	NA	NA	NA	NA	NA	NA	NA	NA	NA	NA	F	T
ACCGTATGCCTCAAGCGTCCTCAGACAGCCA	8	TATTAGACCGTATGCCTCAAGCGTCCTCAGACAGCCAC	38	0.0463800682976984	57.671304	1	-5.849782	F	NA	NA	NA	NA	NA	NA	NA	NA	NA	NA	NA	NA	NA	NA	NA	NA	NA	NA	F	NA	NA	NA	NA	NA	NA	NA	NA	NA	NA	NA	NA	NA	NA	NA	NA	NA	NA	NA
ATCGATCATTCTGAAAGTAGTTTCTCGGCCG	9	CCGAAATCCGGCCGAGAAACTACTTTCAGAATGATCGAT	39	0.0364003358440032	1	6.580333	2.718161	F	NA	NA	NA	NA	NA	NA	NA	NA	NA	NA	NA	NA	NA	NA	NA	NA	NA	NA	F	NA	NA	NA	NA	NA	NA	NA	NA	NA	NA	NA	NA	NA	NA	NA	NA	NA	NA	NA
ACGACCTTGCCGGTCTGACCGACCTGCCAGT	9	GCCACGACCTTGCCGGTCTGACCGACCTGCCAGTCGTTC	39	0.0231990636763461	36.896522	1	-5.205413	F	NA	NA	NA	NA	NA	NA	NA	NA	NA	NA	NA	NA	NA	NA	NA	NA	NA	NA	F	NA	NA	NA	NA	NA	NA	NA	NA	NA	NA	NA	NA	NA	NA	NA	NA	NA	NA	NA
AGCTCGGCTTCGTCAACGAGGTGGTGCCGCA	10	GAGCTCGGCTTCGTCAACGAGGTGGTGCCGCAGGGCGAGG	40	0.0235347144380465	6.533043	1.362	-2.262028	F	NA	NA	NA	NA	NA	NA	NA	NA	NA	NA	NA	NA	NA	NA	NA	NA	NA	NA	F	NA	NA	NA	NA	NA	NA	NA	NA	NA	NA	NA	NA	NA	NA	NA	NA	NA	NA	NA
CGAATATCACACGGTCTGCGACGATCTCATC	24	GGCGCATGTCCGCGATCCCCGCGGAATCATTTCCGAATATCACACGGTCTGCGACGATCTCATCCGC	67	0.0367635276817846	11.965217	1.320333	-3.179873	F	NA	NA	NA	NA	NA	NA	NA	NA	NA	NA	NA	NA	NA	NA	NA	NA	NA	NA	F	NA	NA	NA	NA	NA	NA	NA	NA	NA	NA	NA	NA	NA	NA	NA	NA	NA	NA	NA
TTAAGGACCTGTCGCTGCGGCACGGCGCGAA	2	TTAAGGACCTGTCGCTGCGGCACGGCGCGAAT	32	0.0384812101403542	1	4.568333	2.191668	F	NA	NA	NA	NA	NA	NA	NA	NA	NA	NA	NA	NA	NA	NA	NA	NA	NA	NA	F	NA	NA	NA	NA	NA	NA	NA	NA	NA	NA	NA	NA	NA	NA	NA	NA	NA	NA	NA
AGGCGTCGCCACGCGCGCCGAGATGTTTCGC	11	GCGAAACATCTCGGCGCGCGTGGCGACGCCTTCGAAGATCT	41	0.0443549012097597	1	4.810667	2.266237	F	NA	NA	NA	NA	NA	NA	NA	NA	NA	NA	NA	NA	NA	NA	NA	NA	NA	NA	F	NA	NA	NA	NA	NA	NA	NA	NA	NA	NA	NA	NA	NA	NA	NA	NA	NA	NA	NA
ACACGCGCATGATCGATGCGATCAGCGCACC	18	GATGGTGCAGGACCTCTTGAACGTGGTGCGCTGATCGCATCGATCATGCGCGTGTGA	57	0.0386459288309207	13.880435	1.479	-3.230359	F	NA	NA	NA	NA	NA	NA	NA	NA	NA	NA	NA	NA	NA	NA	NA	NA	NA	NA	F	NA	NA	NA	NA	NA	NA	NA	NA	NA	NA	NA	NA	NA	NA	NA	NA	NA	NA	NA
CAGCCCTTGTTTCATGTTTCCTAAAAGCAGA	8	AATATTCTGCTTTTAGGAAACATGAAACAAGGGCTGAC	38	0.0438296645685958	23.859565	1.397	-4.094164	T	9180	chr12	108522870	108522907	NA	38M	0	0	0	1	0	0	F	F	1	0.973684210526316	1	1	F	NA	ENSG00000075856	SART3	-	protein_coding	NA	NA	NA	NA	NA	NA	NA	NA	NA	NA	NA	NA	T	F
GTCAGGGGCAGGTTACTCACGTGTTACTCAC	1	GTCAGGGGCAGGTTACTCACGTGTTACTCAC	31	0.0465682073123754	3.143913	12.908	2.037632	T	19500	chr8	5857663	5857680	NA	13S18M	0	0	0	0	0	13	F	T	0.580645161290323	1	1	0	F	NA	NA	NA	NA	NA	NA	NA	NA	NA	ENSG00000286969	-	AC087369.2	2687	ENSG00000222589	-	RN7SKP159	53264	NA	NA
CCGGCGAGGTGCGCGAGACGCATCGCCGTCC	28	ATGGTGGAGGACGAAGAAACCGGCGAGGTGCGCGAGACGCATCGCCGTCCCAACATTTT	59	0.0267272234796777	31.901304	2.869667	-3.47466	F	NA	NA	NA	NA	NA	NA	NA	NA	NA	NA	NA	NA	NA	NA	NA	NA	NA	NA	F	NA	NA	NA	NA	NA	NA	NA	NA	NA	NA	NA	NA	NA	NA	NA	NA	NA	NA	NA
CCGAGTTAATGATGATCACGTGAACCAATGC	6	TCGCATTGGTTCACGTGATCATCATTAACTCGGAGATGAATATGA	45	0.0320577316438781	1.48087	11.333667	2.936098	F	NA	NA	NA	NA	NA	NA	NA	NA	NA	NA	NA	NA	NA	NA	NA	NA	NA	NA	F	NA	NA	NA	NA	NA	NA	NA	NA	NA	NA	NA	NA	NA	NA	NA	NA	NA	NA	NA
ACATGGCGCGTGAGCGCCGCGAACTTGCCAC	1	ACATGGCGCGTGAGCGCCGCGAACTTGCCAC	31	0.0454375042658951	1	5.648333	2.497825	F	NA	NA	NA	NA	NA	NA	NA	NA	NA	NA	NA	NA	NA	NA	NA	NA	NA	NA	F	NA	NA	NA	NA	NA	NA	NA	NA	NA	NA	NA	NA	NA	NA	NA	NA	NA	NA	NA
CCTGGCGCTTGGTCCACCGGTACAGGAACGC	20	GCGTGATCACCTTCGCCGCTGCAATCGCGTTCCTGTACCGGTGGACCAAGCGCCAGGCGAA	61	0.0338042206473538	24.376087	1.260667	-4.273207	F	NA	NA	NA	NA	NA	NA	NA	NA	NA	NA	NA	NA	NA	NA	NA	NA	NA	NA	F	NA	NA	NA	NA	NA	NA	NA	NA	NA	NA	NA	NA	NA	NA	NA	NA	NA	NA	NA
CTGTTGGGTTCTGCTCCGAGGTCGCCCCAAC	5	CTGTTGGGTTCTGCTCCGAGGTCGCCCCAACCGAATTTT	39	0.0173001774804191	1.126522	6.272667	2.477203	T	16004	chrM	2803	2841	NA	39M	0	0	0	3	0	0	F	F	1	0.923076923076923	1	3	F	NA	ENSG00000210082	MT-RNR2	+	Mt_rRNA	NA	NA	NA	NA	NA	NA	NA	NA	NA	NA	NA	NA	T	F
CGAGCAGCGTGAGCCTGTGTTCTCCCGGGCG	7	CCCAGACGCCCGGGAGAACACAGGCTCACGCTGCTCG	37	0.0105219561403509	200.208696	1.081667	-7.532104	T	13019	KI270798.1	104232	104268	NA	37M	0	0	0	0	0	0	F	F	1	1	139	0	F	NA	NA	NA	NA	NA	NA	NA	NA	NA	NA	NA	NA	NA	NA	NA	NA	NA	NA	NA
CGACCAGTATCTTCATCCCCGGGACTATGGC	4	CGACGACCAGTATCTTCATCCCCGGGACTATGGC	34	0.0397639514109272	9.943478	1	-3.313751	F	NA	NA	NA	NA	NA	NA	NA	NA	NA	NA	NA	NA	NA	NA	NA	NA	NA	NA	F	NA	NA	NA	NA	NA	NA	NA	NA	NA	NA	NA	NA	NA	NA	NA	NA	NA	NA	NA
TCCCACAGGATCAGCCTGTGCCGCTTCGACA	8	TGTCCCACAGGATCAGCCTGTGCCGCTTCGACAGCGCC	38	0.0428143902450789	30.173913	1	-4.91523	F	NA	NA	NA	NA	NA	NA	NA	NA	NA	NA	NA	NA	NA	NA	NA	NA	NA	NA	F	NA	NA	NA	NA	NA	NA	NA	NA	NA	NA	NA	NA	NA	NA	NA	NA	NA	NA	NA
CGGGTTGGCGCCCACGCACATGAACTCCTGC	43	TCCATAACGATGCCGGTGTCTCGGTGATCGAGATCGGATCGCAGGAGTTCATGTGCGTGGGCGCCAACCCGCC	73	0.0161506294623084	1	12.726	3.669707	F	NA	NA	NA	NA	NA	NA	NA	NA	NA	NA	NA	NA	NA	NA	NA	NA	NA	NA	F	NA	NA	NA	NA	NA	NA	NA	NA	NA	NA	NA	NA	NA	NA	NA	NA	NA	NA	NA
GCAATCCCCTGGATCGCGCCTAGACCAGGAA	5	GCAATCCCCTGGATCGCGCCTAGACCAGGAAGCTT	35	0.0394168379548595	60.56	1.091	-5.794642	F	NA	NA	NA	NA	NA	NA	NA	NA	NA	NA	NA	NA	NA	NA	NA	NA	NA	NA	F	NA	NA	NA	NA	NA	NA	NA	NA	NA	NA	NA	NA	NA	NA	NA	NA	NA	NA	NA
AGATCGGCCACATGCCCTTCACGGTCGGAGG	38	GTTGACGGCGATGGCGCGCCCGGTCCGCCCTCCGACCGTGAAGGGCATGTGGCCGATCTCGAGAGCAA	68	0.0131364244286752	1.87087	9.990333	2.416823	F	NA	NA	NA	NA	NA	NA	NA	NA	NA	NA	NA	NA	NA	NA	NA	NA	NA	NA	F	NA	NA	NA	NA	NA	NA	NA	NA	NA	NA	NA	NA	NA	NA	NA	NA	NA	NA	NA
ACACAAGAGAGCAAGAAAATGTGTCACATCT	14	GGTATAGATGTGACACATTTTCTTGCTCTCTTGTGTTCTGCTAA	44	0.0106908320161543	1	14.082333	3.815814	T	1918	chr17	18651592	18651635	NA	44M	0	0	0	1	0	0	F	F	1	0.977272727272727	1	1	F	NA	ENSG00000287058	AC026271.4	-	lncRNA	NA	NA	NA	NA	NA	NA	NA	NA	NA	NA	NA	NA	F	T
GAAGTCACATTCGCGCTCGATGTGGCCGCGC	42	GACGAACTGCCGGTCGAAGTCACATTCGCGCTCGATGTGGCCGCGCCGCCGACCAAACCATTCCCAGTGCCAA	73	0.00169152547153182	24.295652	6.978333	-1.799744	F	NA	NA	NA	NA	NA	NA	NA	NA	NA	NA	NA	NA	NA	NA	NA	NA	NA	NA	F	NA	NA	NA	NA	NA	NA	NA	NA	NA	NA	NA	NA	NA	NA	NA	NA	NA	NA	NA
CGCACGATTATGGTCTCGATGCGCGGAGCGA	3	CGCACGATTATGGTCTCGATGCGCGGAGCGACT	33	0.0351464381270045	32.901304	2.508333	-3.713344	F	NA	NA	NA	NA	NA	NA	NA	NA	NA	NA	NA	NA	NA	NA	NA	NA	NA	NA	F	NA	NA	NA	NA	NA	NA	NA	NA	NA	NA	NA	NA	NA	NA	NA	NA	NA	NA	NA
AGGCGCGGCGCTCATCGAGTACACGGTGCTG	1	AGGCGCGGCGCTCATCGAGTACACGGTGCTG	31	0.0449414551061306	1	4.814667	2.267436	F	NA	NA	NA	NA	NA	NA	NA	NA	NA	NA	NA	NA	NA	NA	NA	NA	NA	NA	F	NA	NA	NA	NA	NA	NA	NA	NA	NA	NA	NA	NA	NA	NA	NA	NA	NA	NA	NA
GTCGCCAGCCATGATCGGGAGCTTCTGGAAA	12	TTTCCAGAAGCTCCCGATCATGGCTGGCGACAAGGACGCCCC	42	0.0211861989788878	64.306087	1	-6.006883	F	NA	NA	NA	NA	NA	NA	NA	NA	NA	NA	NA	NA	NA	NA	NA	NA	NA	NA	F	NA	NA	NA	NA	NA	NA	NA	NA	NA	NA	NA	NA	NA	NA	NA	NA	NA	NA	NA
CCGGTGACCATCACCATCGTCGGCAGCAACG	12	CGAGCCGGTGACCATCACCATCGTCGGCAGCAACGATACGCC	42	0.0329767601780464	13.205217	1	-3.723036	F	NA	NA	NA	NA	NA	NA	NA	NA	NA	NA	NA	NA	NA	NA	NA	NA	NA	NA	F	NA	NA	NA	NA	NA	NA	NA	NA	NA	NA	NA	NA	NA	NA	NA	NA	NA	NA	NA
CGACTTCACTTCGTTGTCGATGAATTGCTCG	1	CGACTTCACTTCGTTGTCGATGAATTGCTCG	31	0.0385038381168697	1	14.862333	3.893589	F	NA	NA	NA	NA	NA	NA	NA	NA	NA	NA	NA	NA	NA	NA	NA	NA	NA	NA	F	NA	NA	NA	NA	NA	NA	NA	NA	NA	NA	NA	NA	NA	NA	NA	NA	NA	NA	NA
AGGAATATTTTCTCTGTGGGGACTGGACAGG	4	ACCCTGTCCAGTCCCCACAGAGAAAATATTCCTC	34	0.0437979101852626	62.272609	6.88	-3.178117	T	5378	chr9	92740799	92740815	NA	3S17M14S	0	0	0	0	14	3	T	T	0.5	1	1	0	F	NA	ENSG00000185963	BICD2	-	protein_coding	NA	NA	NA	NA	NA	NA	NA	NA	NA	NA	NA	NA	F	T
CGGAACTGCTCCTGCGCGGCGGCGATGATCC	6	CGGAACTGCTCCTGCGCGGCGGCGATGATCCGGTAG	36	0.0377055072803944	45.461304	2.194	-4.373004	F	NA	NA	NA	NA	NA	NA	NA	NA	NA	NA	NA	NA	NA	NA	NA	NA	NA	NA	F	NA	NA	NA	NA	NA	NA	NA	NA	NA	NA	NA	NA	NA	NA	NA	NA	NA	NA	NA
CAGGAACCAGCCCTCGGGCTTGCCGTCTTCG	13	GCGTTCGATCACCAGGAACCAGCCCTCGGGCTTGCCGTCTTCGGTCTTCT	50	0.0382596304412801	10.933913	1	-3.450738	F	NA	NA	NA	NA	NA	NA	NA	NA	NA	NA	NA	NA	NA	NA	NA	NA	NA	NA	T	chr17:31489165:-|chr6:154501914:-	NA	NA	NA	NA	NA	NA	NA	NA	NA	NA	NA	NA	NA	NA	NA	NA	NA	NA
CGAACCGACATGTAAGCCGCGTGCGGTCCGC	25	ACGAACCGACATGTAAGCCGCGTGCGGTCCGCCATCACCCATCGGGACGCCGAAG	55	0.0370962846450763	42.675217	1.083	-5.300293	F	NA	NA	NA	NA	NA	NA	NA	NA	NA	NA	NA	NA	NA	NA	NA	NA	NA	NA	F	NA	NA	NA	NA	NA	NA	NA	NA	NA	NA	NA	NA	NA	NA	NA	NA	NA	NA	NA
GCTCGGCCTCAACGTCGCGCAGGGCCTGAAC	5	AAGTTCAGGCCCTGCGCGACGTTGAGGCCGAGCGA	35	0.0395354427063366	44.162174	1	-5.464739	F	NA	NA	NA	NA	NA	NA	NA	NA	NA	NA	NA	NA	NA	NA	NA	NA	NA	NA	F	NA	NA	NA	NA	NA	NA	NA	NA	NA	NA	NA	NA	NA	NA	NA	NA	NA	NA	NA
CGTCGTCGGTTTCCAGCGCGAGCTTCTTGCC	1	CGTCGTCGGTTTCCAGCGCGAGCTTCTTGCC	31	0.0334498371025336	11.002609	1	-3.459774	T	15127	chrX	43654873	43654888	NA	7S16M8S	0	0	0	0	8	7	T	T	0.516129032258065	1	1	0	F	NA	NA	NA	NA	NA	NA	NA	NA	NA	ENSG00000285899	+	AL023574.1	216217	ENSG00000189221	+	MAOA	18	NA	NA
ACGCTGAGCCGCGACGTCTATGGCGGCACCT	38	GCGGCGCTGAGCTTTGAGAAGCGGAAGGTGCCGCCATAGACGTCGCGGCTCAGCGTCTGATAGGCCGC	68	0.0274143211469534	67.471739	4.234	-3.99419	F	NA	NA	NA	NA	NA	NA	NA	NA	NA	NA	NA	NA	NA	NA	NA	NA	NA	NA	F	NA	NA	NA	NA	NA	NA	NA	NA	NA	NA	NA	NA	NA	NA	NA	NA	NA	NA	NA
GCTGATGTTTCCGTTCAATTACATTCGATGA	14	AATCATCATCGAATGTAATTGAACGGAAACATCAGCGAATGGAATC	46	0.0343701736627167	137.745217	2.110667	-6.028159	T	18585	chr16	34589108	34589153	NA	46M	0	0	0	1	0	0	F	F	1	0.978260869565217	3	1	F	NA	NA	NA	NA	NA	NA	NA	NA	NA	ENSG00000286968	+	FP325313.2	140243	ENSG00000279165	+	AC135776.4	352823	NA	NA
GCACCCCGGATACTGCTGCGGCGCCGCGGGC	1	GCACCCCGGATACTGCTGCGGCGCCGCGGGC	31	0.0443253489696645	1	6.425333	2.683771	T	17322	chr4	15004215	15004233	NA	19M12S	0	0	0	0	12	0	T	F	0.612903225806452	1	1	0	F	NA	ENSG00000137449	CPEB2	+	protein_coding	NA	NA	NA	NA	NA	NA	NA	NA	NA	NA	NA	NA	T	F
CCGGAGAAGCCGGCGGGAGCCCCGGGGAGCC	1	CCGGAGAAGCCGGCGGGAGCCCCGGGGAGCC	31	0.0469924451705497	1	11.586333	3.534352	T	11300	chr21	8399504	8399534	NA	31M	0	0	0	2	0	0	F	F	1	0.935483870967742	3	2	F	NA	ENSG00000280441	FP236383.1	+	lncRNA	NA	NA	NA	NA	NA	NA	NA	NA	NA	NA	NA	NA	F	T
GGAATGGAATGCAGTGAAATGGAATCAAACC	17	TGGAATGGAATGCAGTGAAATGGAATCAAACCTAGTGCAATGGAATG	47	0.033522519625589	147.637826	1	-7.205919	T	18770	chr17	26857464	26857488	NA	25M22S	0	0	0	0	22	0	T	F	0.531914893617021	1	3	0	F	NA	NA	NA	NA	NA	NA	NA	NA	NA	ENSG00000264970	+	AC131274.3	4150762	ENSG00000263433	+	AC069061.1	124205	NA	NA
CCAACGCAACCGCTTCGGCCTGGATAAATCG	16	CATCAGCGTTGAGGACCAACGCAACCGCTTCGGCCTGGATAAATCG	46	0.0111507583001328	48.293043	1	-5.593743	T	9987	chr7	88757614	88757636	NA	23S23M	0	0	0	3	0	23	F	T	0.5	0.869565217391304	1	3	F	NA	NA	NA	NA	NA	NA	NA	NA	NA	ENSG00000233420	+	AC002069.1	890	ENSG00000182348	+	ZNF804B	1731	NA	NA
GCAGTGAGGTGTGATATGAGTCAAATGCTTA	15	AGATATAAGCATTTGACTCATATCACACCTCACTGCTTAGACAGACTCTTCCA	53	0.0110005332614046	92.47087	4.727333	-4.289901	F	NA	NA	NA	NA	NA	NA	NA	NA	NA	NA	NA	NA	NA	NA	NA	NA	NA	NA	F	NA	NA	NA	NA	NA	NA	NA	NA	NA	NA	NA	NA	NA	NA	NA	NA	NA	NA	NA
CGGCCGCGACTATGTCGCGGGCTTCAAGCGC	28	CAGAACGACGATTTCGGCCGCGACTATGTCGCGGGCTTCAAGCGCGCGCTGGGCGCGA	58	0.0308559034509533	9.259565	1	-3.210944	F	NA	NA	NA	NA	NA	NA	NA	NA	NA	NA	NA	NA	NA	NA	NA	NA	NA	NA	F	NA	NA	NA	NA	NA	NA	NA	NA	NA	NA	NA	NA	NA	NA	NA	NA	NA	NA	NA
ATACATGCTTTGGGTACTTTGATATTTTCTG	6	AATACATGCTTTGGGTACTTTGATATTTTCTGTACA	36	0.0423017907012293	156.504348	2.473667	-5.983408	T	6373	KI270337.1	517	552	NA	36M	0	0	0	1	0	0	F	F	1	0.972222222222222	1	1	F	NA	NA	NA	NA	NA	NA	NA	NA	NA	NA	NA	NA	NA	NA	NA	NA	NA	NA	NA
GAAGGACGCACGCTATGGCATCGTCACGACA	9	CGACGTGAAGGACGCACGCTATGGCATCGTCACGACAGG	39	0.0339678776890739	14.88087	1	-3.895387	F	NA	NA	NA	NA	NA	NA	NA	NA	NA	NA	NA	NA	NA	NA	NA	NA	NA	NA	F	NA	NA	NA	NA	NA	NA	NA	NA	NA	NA	NA	NA	NA	NA	NA	NA	NA	NA	NA
GGGGGTGCTCTATGGGGCTGACATTAAGAGA	11	GCCGATCGATCTCTTAATGTCAGCCCCATAGAGCACCCCCC	41	0.0263429658098328	26.318696	3.705333	-2.828413	T	19249	chr11	113119834	113119853	NA	13S20M8S	0	0	0	1	8	13	T	T	0.48780487804878	0.95	1	1	F	NA	ENSG00000149294	NCAM1	+	protein_coding	NA	NA	NA	NA	NA	NA	NA	NA	NA	NA	NA	NA	F	T
ATGATCTCACTCTTTGGCCGCTTCGACACGC	11	AGCCATGATCTCACTCTTTGGCCGCTTCGACACGCCGATCTGCGATCAGCTC	52	0.0303136655124233	5.582174	1	-2.480827	F	NA	NA	NA	NA	NA	NA	NA	NA	NA	NA	NA	NA	NA	NA	NA	NA	NA	NA	F	NA	NA	NA	NA	NA	NA	NA	NA	NA	NA	NA	NA	NA	NA	NA	NA	NA	NA	NA
AAACTGGACAACGGATCTACTAAGCTGTTCA	5	CTGAAACTGGACAACGGATCTACTAAGCTGTTCAC	35	0.0444797740066076	9.076087	3.532	-1.361585	F	NA	NA	NA	NA	NA	NA	NA	NA	NA	NA	NA	NA	NA	NA	NA	NA	NA	NA	F	NA	NA	NA	NA	NA	NA	NA	NA	NA	NA	NA	NA	NA	NA	NA	NA	NA	NA	NA
AGGACTTTAAAAAGGGGGCTTTGCAGCCGAG	2	GAGGACTTTAAAAAGGGGGCTTTGCAGCCGAG	32	0.0460215384825817	1	8.87	3.148934	T	5421	chr11	114589108	114589123	NA	16M16S	0	0	0	0	16	0	T	F	0.5	1	1	0	F	NA	ENSG00000137634	NXPE4	-	protein_coding	NA	NA	NA	NA	NA	NA	NA	NA	NA	NA	NA	NA	F	T
TCACGCACGGGATTAGACGATCCTACGAAAA	22	CAGGATGAGTGAGAGAAATATCACGCACGGGATTAGACGATCCTACGAAAAG	52	0.0339507585724571	58.218261	1	-5.8634	F	NA	NA	NA	NA	NA	NA	NA	NA	NA	NA	NA	NA	NA	NA	NA	NA	NA	NA	F	NA	NA	NA	NA	NA	NA	NA	NA	NA	NA	NA	NA	NA	NA	NA	NA	NA	NA	NA
ATATATATTTGATACTCTACATGAAATATCA	5	AAATATATATTTGATACTCTACATGAAATATCAAA	35	0.0469426905144561	339.450435	7.152	-5.56871	T	6527	chr3	93470382	93470416	NA	35M	0	0	0	1	0	0	F	F	1	0.971428571428571	1	1	F	NA	NA	NA	NA	NA	NA	NA	NA	NA	ENSG00000283544	-	ABBA01000935.2	1956608	ENSG00000251727	+	RNU6-488P	373347	NA	NA
CGGTCGTACTCAACTCCGAGGCCACCGGCTA	36	GCCGATGCGGTCGTACTCAACTCCGAGGCCACCGGCTACACCATGCCGTTTCCGGTCCCCGGCCAC	66	0.0257824466866904	1	6.817667	2.769278	F	NA	NA	NA	NA	NA	NA	NA	NA	NA	NA	NA	NA	NA	NA	NA	NA	NA	NA	F	NA	NA	NA	NA	NA	NA	NA	NA	NA	NA	NA	NA	NA	NA	NA	NA	NA	NA	NA
ATCCCTGAACTGATGACAGAGGTGATGTAAC	5	CACATATCCCTGAACTGATGACAGAGGTGATGTAAC	36	0.0300651659303328	189.255217	1.902333	-6.636419	T	6877	GL000216.2	163066	163101	NA	36M	0	0	0	1	0	0	F	F	1	0.972222222222222	6	1	F	NA	NA	NA	NA	NA	NA	NA	NA	NA	NA	NA	NA	NA	NA	NA	NA	NA	NA	NA
CGTTCGACCATCTTCTGCGAGGCCAGCACGC	4	AGGGCGTGCTGGCCTCGCAGAAGATGGTCGAACG	34	0.0455294187044728	1	5.707667	2.512901	T	15345	chr22	39171505	39171521	NA	17S17M	0	0	0	1	0	17	F	T	0.5	0.941176470588235	1	1	F	NA	NA	NA	NA	NA	NA	NA	NA	NA	ENSG00000227009	+	FUNDC2P4	15561	ENSG00000100311	-	PDGFB	51837	NA	NA
AGGCAGCATGACGAAGGCAGCCGGCGCGCTG	6	CAGGCAGCATGACGAAGGCAGCCGGCGCGCTGAATG	36	0.0267589238420411	5.810435	1	-2.538646	F	NA	NA	NA	NA	NA	NA	NA	NA	NA	NA	NA	NA	NA	NA	NA	NA	NA	NA	F	NA	NA	NA	NA	NA	NA	NA	NA	NA	NA	NA	NA	NA	NA	NA	NA	NA	NA	NA
TTTGCAACCATACTTCCCCCGGAACCCAAAA	15	CGGGAAACCAAAGTTTTTGGGTTCCGGGGGAAGTATGGTTGCAAA	45	0.0287295115260268	80.628696	1	-6.333221	F	NA	NA	NA	NA	NA	NA	NA	NA	NA	NA	NA	NA	NA	NA	NA	NA	NA	NA	F	NA	NA	NA	NA	NA	NA	NA	NA	NA	NA	NA	NA	NA	NA	NA	NA	NA	NA	NA
GGCCTGTGGAGGTTGGTCAGGTGGTCACCCA	1	GGCCTGTGGAGGTTGGTCAGGTGGTCACCCA	31	0.0199143378736721	1.448696	14.189	3.291946	T	18997	chr19	3872003	3872033	NA	31M	0	0	0	1	0	0	F	F	1	0.967741935483871	2	1	F	NA	ENSG00000266989	FTLP5	+	processed_pseudogene	NA	NA	NA	NA	NA	NA	NA	NA	NA	NA	NA	NA	T	F
GCGATGTGCTTGAGGCCGACGCTGTCGGCCC	4	CGGCGATGTGCTTGAGGCCGACGCTGTCGGCCCA	34	0.0303711035359431	48.687391	1.051333	-5.533257	F	NA	NA	NA	NA	NA	NA	NA	NA	NA	NA	NA	NA	NA	NA	NA	NA	NA	NA	F	NA	NA	NA	NA	NA	NA	NA	NA	NA	NA	NA	NA	NA	NA	NA	NA	NA	NA	NA
GCGCAGCTATCCGGTCGGCCATCTCTCGACC	24	CGATCCAGTACATGGTCGAGAGATGGCCGACCGGATAGCTGCGCTGGCTGTGCC	54	0.0439904434626205	7.012609	1	-2.809951	F	NA	NA	NA	NA	NA	NA	NA	NA	NA	NA	NA	NA	NA	NA	NA	NA	NA	NA	F	NA	NA	NA	NA	NA	NA	NA	NA	NA	NA	NA	NA	NA	NA	NA	NA	NA	NA	NA
AAAGAATCACTTGTGATTCCTTGCTGAGCAC	27	CCCCCCGCGAATCAAGGTGCTCAGCAAGGAATCACAAGTGATTCTTTCGACTCAACT	57	0.00388660348319158	38.305652	2.312	-4.050344	F	NA	NA	NA	NA	NA	NA	NA	NA	NA	NA	NA	NA	NA	NA	NA	NA	NA	NA	F	NA	NA	NA	NA	NA	NA	NA	NA	NA	NA	NA	NA	NA	NA	NA	NA	NA	NA	NA
CCACCACTCGGTCGGGATGCGCGGCCTCGCC	9	ATGCAACCACCACTCGGTCGGGATGCGCGGCCTCGCCAA	39	0.0490690863549357	9.175217	1.680667	-2.448708	F	NA	NA	NA	NA	NA	NA	NA	NA	NA	NA	NA	NA	NA	NA	NA	NA	NA	NA	F	NA	NA	NA	NA	NA	NA	NA	NA	NA	NA	NA	NA	NA	NA	NA	NA	NA	NA	NA
CCCTATTAAGACTCGCTTTCGCTACGGCTTC	1	CCCTATTAAGACTCGCTTTCGCTACGGCTTC	31	0.0454853251660967	59.439565	2.159333	-4.782766	F	NA	NA	NA	NA	NA	NA	NA	NA	NA	NA	NA	NA	NA	NA	NA	NA	NA	NA	F	NA	NA	NA	NA	NA	NA	NA	NA	NA	NA	NA	NA	NA	NA	NA	NA	NA	NA	NA
CCCGACGTAGCCAACCAGCCATGCACTTGGC	14	CCCGACGTAGCCAACCAGCCATGCACTTGGCAGTACAACTGGCAC	45	0.0305188189687035	1.271304	16.633667	3.709725	F	NA	NA	NA	NA	NA	NA	NA	NA	NA	NA	NA	NA	NA	NA	NA	NA	NA	NA	F	NA	NA	NA	NA	NA	NA	NA	NA	NA	NA	NA	NA	NA	NA	NA	NA	NA	NA	NA
CGAAGCTCCGTCAAAACCCTTGGAGGACGAG	18	GACCGAGACACCACACGAAGCTCCGTCAAAACCCTTGGAGGACGAGTC	48	0.0406056093103538	59.649565	1.136333	-5.714054	F	NA	NA	NA	NA	NA	NA	NA	NA	NA	NA	NA	NA	NA	NA	NA	NA	NA	NA	F	NA	NA	NA	NA	NA	NA	NA	NA	NA	NA	NA	NA	NA	NA	NA	NA	NA	NA	NA
AGCTGACATCCTCTGGCTCACAGCACCAACT	10	GCAGCTGACATCCTCTGGCTCACAGCACCAACTTCTCCAA	40	0.0351887375494375	3.922174	25.195667	2.68345	T	5153	chr1	173487869	173487908	NA	40M	0	0	0	1	0	0	F	F	1	0.975	1	1	F	NA	ENSG00000117592	PRDX6	+	protein_coding	NA	NA	NA	NA	NA	NA	NA	NA	NA	NA	NA	NA	T	F
CGGACCGGAGCCGTCGGCAATCGCATCGCTC	10	CCGGACCGGAGCCGTCGGCAATCGCATCGCTCCAGGGCTT	40	0.0397367941211178	1.046957	6.503667	2.635051	F	NA	NA	NA	NA	NA	NA	NA	NA	NA	NA	NA	NA	NA	NA	NA	NA	NA	NA	F	NA	NA	NA	NA	NA	NA	NA	NA	NA	NA	NA	NA	NA	NA	NA	NA	NA	NA	NA
ATGGCCTGACTAAGAGCCAACAATGGGCGCA	29	CGATCGATGGCCTGACTAAGAGCCAACAATGGGCGCATCACGATCTCCGCGGTCGCGCG	59	0.00877112095756257	14.624783	1.757	-3.057229	F	NA	NA	NA	NA	NA	NA	NA	NA	NA	NA	NA	NA	NA	NA	NA	NA	NA	NA	F	NA	NA	NA	NA	NA	NA	NA	NA	NA	NA	NA	NA	NA	NA	NA	NA	NA	NA	NA
CCCCAGCTCTCTGGGAGTCTCCTGGGTCTCC	7	GGAGACCCAGGAGACTCCCAGAGAGCTGGGGGTGAGC	37	0.0330967648450143	92.406087	1	-6.529916	T	10499	KI270744.1	111534	111570	NA	37M	0	0	0	1	0	0	F	F	1	0.972972972972973	1	1	F	NA	NA	NA	NA	NA	NA	NA	NA	NA	NA	NA	NA	NA	NA	NA	NA	NA	NA	NA
CCGACTCACCCTGCGCGGATTAGCCTTGCGC	10	CCTGCGCAAGGCTAATCCGCGCAGGGTGAGTCGGCCCCTA	40	0.0256419728747536	1.886957	22.443667	3.572175	F	NA	NA	NA	NA	NA	NA	NA	NA	NA	NA	NA	NA	NA	NA	NA	NA	NA	NA	F	NA	NA	NA	NA	NA	NA	NA	NA	NA	NA	NA	NA	NA	NA	NA	NA	NA	NA	NA
GTACCTTGATCTGCCAGGCGGTGCGCCAAGA	7	GTACCTTGATCTGCCAGGCGGTGCGCCAAGAGCTGGC	37	0.0404550728989255	25.199565	1.208	-4.382706	F	NA	NA	NA	NA	NA	NA	NA	NA	NA	NA	NA	NA	NA	NA	NA	NA	NA	NA	F	NA	NA	NA	NA	NA	NA	NA	NA	NA	NA	NA	NA	NA	NA	NA	NA	NA	NA	NA
GAGAATCTTCGAATGGCCACGAATGGAATCA	9	AATCGAAGAGAATCTTCGAATGGCCACGAATGGAATCAT	39	0.0387819960967519	74.949565	1.136333	-6.043463	T	16779	chr10	41848680	41848718	NA	39M	0	0	0	1	0	0	F	F	1	0.974358974358974	4	1	F	NA	NA	NA	NA	NA	NA	NA	NA	NA	ENSG00000233832	+	AL590623.1	3065573	ENSG00000229485	-	KSR1P1	300591	NA	NA
CCTGTCTCGGCCTCTCTAAGCACCGAAGCAC	6	CGCCTGTCTCGGCCTCTCTAAGCACCGAAGCACGCG	36	0.0328450094314729	83.414783	2.752667	-4.921401	T	12190	chr21	8235382	8235411	NA	30M6S	0	0	0	0	6	0	T	F	0.833333333333333	1	3	0	F	NA	ENSG00000286155	FP671120.8	+	TEC	NA	NA	NA	NA	NA	NA	NA	NA	NA	NA	NA	NA	T	F
AGGTGATCTCGTCGGCCACGCCGCGTTCGAT	61	ACCAATGTGCAGGCGTCGGCACCTGAATCGCGTGACGCGATCGAACGCGGCGTGGCCGACGAGATCACCTTCCCCTGGGGCTCGATCTTCC	91	0.00658238756144964	52.244348	1	-5.707203	F	NA	NA	NA	NA	NA	NA	NA	NA	NA	NA	NA	NA	NA	NA	NA	NA	NA	NA	F	NA	NA	NA	NA	NA	NA	NA	NA	NA	NA	NA	NA	NA	NA	NA	NA	NA	NA	NA
AACGGCCGCGGCGCATGCGCCGAGATCGAGC	3	AGAACGGCCGCGGCGCATGCGCCGAGATCGAGC	33	0.0497583073262098	9.93913	1.075667	-3.207888	T	728	chr11	65900982	65900997	NA	16M17S	0	0	0	0	17	0	T	F	0.484848484848485	1	1	0	F	NA	NA	NA	NA	NA	NA	NA	NA	NA	ENSG00000175592	-	FOSL1	410	ENSG00000175573	-	C11orf68	15812	NA	NA
CCCGGGACGCGCATCAAAAATCGCGCGGCGA	130	GGGAGCGCACCGCAATTTCAATTGAGGAGGCGACGATGTTCAGGTCTGCGCGCTTCCCGGGTTCGCCGCGCGATTTTTGATGCGCGTCCCGGGATCGGATCCCGGGTGAAGTTCTGACACCCACACACAAATCAAGTCTGTCTCGAGCTCCGCGCCTGCGGA	162	0.00507802902933172	1	9.947667	3.314358	F	NA	NA	NA	NA	NA	NA	NA	NA	NA	NA	NA	NA	NA	NA	NA	NA	NA	NA	F	NA	NA	NA	NA	NA	NA	NA	NA	NA	NA	NA	NA	NA	NA	NA	NA	NA	NA	NA
CGGCTGAGTGAAGCATTGGACTGTAAATCTA	1	CGGCTGAGTGAAGCATTGGACTGTAAATCTA	31	0.00388660348319158	1.097391	10.858667	3.306697	T	14750	chr1	631024	631054	NA	31M	0	0	0	1	0	0	F	F	1	0.967741935483871	3	1	F	NA	ENSG00000230021	AL669831.3	-	transcribed_processed_pseudogene	NA	NA	NA	NA	NA	NA	NA	NA	NA	NA	NA	NA	F	T
GCAAATTGCGTTCAAAAACTCGATGATTCAC	6	CGGGCGCAAATTGCGTTCAAAAACTCGATGATTCAC	36	0.0465682073123754	27.774783	4.691667	-2.565603	F	NA	NA	NA	NA	NA	NA	NA	NA	NA	NA	NA	NA	NA	NA	NA	NA	NA	NA	F	NA	NA	NA	NA	NA	NA	NA	NA	NA	NA	NA	NA	NA	NA	NA	NA	NA	NA	NA
GCGGCAAGGCGCCGATGTGCATCGGCGAGAC	35	CGAGTTCGCCGGCGAAGGCGAACTCGCCGCCCTCACGGGACTGATAGGCGGCAAGGCGCCGATGTGCATCGGCGAGAC	78	0.0242493937947494	15.29	1.999667	-2.934757	F	NA	NA	NA	NA	NA	NA	NA	NA	NA	NA	NA	NA	NA	NA	NA	NA	NA	NA	F	NA	NA	NA	NA	NA	NA	NA	NA	NA	NA	NA	NA	NA	NA	NA	NA	NA	NA	NA
ACGGCTGCTAGCAAATGGAGACACAACTCCA	1	ACGGCTGCTAGCAAATGGAGACACAACTCCA	31	0.0479462323156089	11.326957	1	-3.501688	T	3293	chr3	50403261	50403276	NA	15S16M	0	0	0	0	0	15	F	T	0.516129032258065	1	2	0	F	NA	ENSG00000007402	CACNA2D2	-	protein_coding	NA	NA	NA	NA	NA	NA	NA	NA	NA	NA	NA	NA	F	T
CCTGAAATACCGCCTGTCCAGGTCGTCGAAC	6	GCCTGAAATACCGCCTGTCCAGGTCGTCGAACAGCC	36	0.0215274108825921	25.570435	1.805667	-3.823873	F	NA	NA	NA	NA	NA	NA	NA	NA	NA	NA	NA	NA	NA	NA	NA	NA	NA	NA	F	NA	NA	NA	NA	NA	NA	NA	NA	NA	NA	NA	NA	NA	NA	NA	NA	NA	NA	NA
CGCGATAGTGATTATCCTGCATGCTATACCG	2	TCGCGATAGTGATTATCCTGCATGCTATACCG	32	0.0390028857178854	1	10.715667	3.42165	T	13957	chr7	53354199	53354215	NA	17M15S	0	0	0	0	15	0	T	F	0.53125	1	1	0	F	NA	NA	NA	NA	NA	NA	NA	NA	NA	ENSG00000271194	+	RNF138P2	37460	ENSG00000199629	+	RNU1-14P	11842	NA	NA
GTCATCCCGCGAAACCGTGATGCGATGATGA	9	CCGTCATCCCGCGAAACCGTGATGCGATGATGACATCAT	39	0.0448284288378651	1.158696	7.991	2.785874	F	NA	NA	NA	NA	NA	NA	NA	NA	NA	NA	NA	NA	NA	NA	NA	NA	NA	NA	F	NA	NA	NA	NA	NA	NA	NA	NA	NA	NA	NA	NA	NA	NA	NA	NA	NA	NA	NA
AACGTTGCCCTTAAAGGCGAATACTCTCATG	12	CACGTCATGAGAGTATTCGCCTTTAAGGGCAACGTTGATCGC	42	0.0414347475931097	56.654348	1.443333	-5.294711	T	763	chr14	46830217	46830237	NA	21S21M	0	0	0	3	0	21	F	T	0.5	0.857142857142857	1	3	F	NA	NA	NA	NA	NA	NA	NA	NA	NA	ENSG00000165496	-	RPL10L	178397	ENSG00000139915	-	MDGA2	9854	NA	NA
AGTGGCAGGAGAAACGGCCTGGCTCGTTGAC	31	AGTGGCAGGAGAAACGGCCTGGCTCGTTGACGCAGCGGTACTGACAGAGGTAGCTGGAGTA	61	0.0144238616121472	1	10.638	3.411155	T	6181	chr11	65868552	65868612	NA	61M	0	0	0	1	0	0	F	F	1	0.983606557377049	1	1	F	NA	ENSG00000172638	EFEMP2	-	protein_coding	NA	NA	NA	NA	NA	NA	NA	NA	NA	NA	NA	NA	T	F
CGTAGGAATCTGCGATAAGCCTCGGGGAGTC	16	AGGACGTAGGAATCTGCGATAAGCCTCGGGGAGTCGATAACCAGAC	46	0.00436579799818016	1	8.511667	3.089442	F	NA	NA	NA	NA	NA	NA	NA	NA	NA	NA	NA	NA	NA	NA	NA	NA	NA	NA	F	NA	NA	NA	NA	NA	NA	NA	NA	NA	NA	NA	NA	NA	NA	NA	NA	NA	NA	NA
CATCGGTAACGAGCGCGAGAATTCGCGCATC	10	GCGACGTGGCCCGATGCGCGAATTCTCGCGCTCGTTACCGATGTC	45	0.0390985619469993	64.771304	2.087333	-4.955622	F	NA	NA	NA	NA	NA	NA	NA	NA	NA	NA	NA	NA	NA	NA	NA	NA	NA	NA	F	NA	NA	NA	NA	NA	NA	NA	NA	NA	NA	NA	NA	NA	NA	NA	NA	NA	NA	NA
ATGAAGTAGGCGCCCGAGATCAGCTCAAGCA	30	AATGCCGAGTCTGAAGGAGCGCGCCAAGACGCTGCTTGAGCTGATCTCGGGCGCCTACTTCATTTT	66	0.0215893268538517	12.42913	1	-3.635653	F	NA	NA	NA	NA	NA	NA	NA	NA	NA	NA	NA	NA	NA	NA	NA	NA	NA	NA	F	NA	NA	NA	NA	NA	NA	NA	NA	NA	NA	NA	NA	NA	NA	NA	NA	NA	NA	NA
GCCAGCGTCGGCGTACCTTCCGGATAGCAAC	4	CCCTTGCTGGCGTTATAGGCCAGCGTCGGCGTACCTTCCGGATAGCAAC	49	0.0343035844918238	1	8.434667	3.076331	F	NA	NA	NA	NA	NA	NA	NA	NA	NA	NA	NA	NA	NA	NA	NA	NA	NA	NA	F	NA	NA	NA	NA	NA	NA	NA	NA	NA	NA	NA	NA	NA	NA	NA	NA	NA	NA	NA
ATCATCAGGATGTTCATGCTGAGCCATTTGC	11	GCAAATGGCTCAGCATGAACATCCTGATGATCGACGAAAAG	41	0.0400374805274978	1	6.409	2.680099	F	NA	NA	NA	NA	NA	NA	NA	NA	NA	NA	NA	NA	NA	NA	NA	NA	NA	NA	F	NA	NA	NA	NA	NA	NA	NA	NA	NA	NA	NA	NA	NA	NA	NA	NA	NA	NA	NA
CGTTTACTGGGGCTTAAATTCTCAGCTTCGA	1	CGTTTACTGGGGCTTAAATTCTCAGCTTCGA	31	0.0208335520429839	40.741304	7.365667	-2.467604	T	15372	chrX	139393799	139393818	NA	20M11S	0	0	0	1	11	0	T	F	0.645161290322581	0.95	1	1	F	NA	NA	NA	NA	NA	NA	NA	NA	NA	ENSG00000173954	+	SNURFL	31418	ENSG00000232549	+	SRD5A1P1	53072	NA	NA
AATAAATCGCGATTGGAAGACCTTCGACCAG	9	TCGGAATAAATCGCGATTGGAAGACCTTCGACCAGCTCG	39	0.0476163514040927	41.636957	1.726667	-4.591803	F	NA	NA	NA	NA	NA	NA	NA	NA	NA	NA	NA	NA	NA	NA	NA	NA	NA	NA	F	NA	NA	NA	NA	NA	NA	NA	NA	NA	NA	NA	NA	NA	NA	NA	NA	NA	NA	NA
AGTCTTAGCTTTGGCTCTCCTTGCAAAGTTA	3	TAACTTTGCAAGGAGAGCCAAAGCTAAGACTCC	33	0.048177752600452	1.181304	4.831333	2.032041	T	6134	chrM	1872	1904	NA	33M	0	0	0	1	0	0	F	F	1	0.96969696969697	1	1	F	NA	ENSG00000210082	MT-RNR2	+	Mt_rRNA	NA	NA	NA	NA	NA	NA	NA	NA	NA	NA	NA	NA	T	F
AGGGTGATGTTCAGGCTCTGCACGAAGGCCA	21	CGCAGGGTGATGTTCAGGCTCTGCACGAAGGCCATGGTGGTGGAGTAGCTG	51	0.0251256824132598	12.477391	1	-3.641244	F	NA	NA	NA	NA	NA	NA	NA	NA	NA	NA	NA	NA	NA	NA	NA	NA	NA	NA	F	NA	NA	NA	NA	NA	NA	NA	NA	NA	NA	NA	NA	NA	NA	NA	NA	NA	NA	NA
AGCATTCTGGCAGCACGGTTACGAGGGGACG	6	AAGCATTCTGGCAGCACGGTTACGAGGGGACGAACC	36	0.0326013172272468	1	7.101333	2.82809	F	NA	NA	NA	NA	NA	NA	NA	NA	NA	NA	NA	NA	NA	NA	NA	NA	NA	NA	F	NA	NA	NA	NA	NA	NA	NA	NA	NA	NA	NA	NA	NA	NA	NA	NA	NA	NA	NA
CTACTTCGCGGGCCTGGCTGACAAGATCGGC	27	CGCCGATCTTGTCAGCCAGGCCCGCGAAGTAGCGCAACCACGCCGGGACAAGGCCGATC	59	0.0308083346407	1	8.679	3.117529	F	NA	NA	NA	NA	NA	NA	NA	NA	NA	NA	NA	NA	NA	NA	NA	NA	NA	NA	F	NA	NA	NA	NA	NA	NA	NA	NA	NA	NA	NA	NA	NA	NA	NA	NA	NA	NA	NA
ATGTTCTCCATGAGCTTGCGGATGCGCTGAA	4	AGCATGTTCTCCATGAGCTTGCGGATGCGCTGAA	34	0.0433247527046597	76.428696	1.178333	-6.019295	T	8151	chr6	100546981	100546998	NA	18M16S	0	0	0	0	16	0	T	F	0.529411764705882	1	1	0	F	NA	ENSG00000112249	ASCC3	-	protein_coding	NA	NA	NA	NA	NA	NA	NA	NA	NA	NA	NA	NA	F	T
AGCCTGATCCTGCTCGCAACGCTGTCGTCCA	2	AGCCTGATCCTGCTCGCAACGCTGTCGTCCAC	32	0.0398094276094276	19.681304	1	-4.298754	T	4823	chr1	217037083	217037098	NA	16M16S	0	0	0	1	16	0	T	F	0.5	0.9375	1	1	F	NA	ENSG00000196482	ESRRG	-	protein_coding	NA	NA	NA	NA	NA	NA	NA	NA	NA	NA	NA	NA	F	T
GTTAGGAAAAGGGCATACAGGACTAGGATGA	13	TGTTAGGAAAAGGGCATACAGGACTAGGATGATGGCGGGCAGGATAGTT	49	0.0233147147704753	12.357826	3.105	-1.99276	T	19811	chrM	7780	7809	NA	30M19S	0	0	0	0	19	0	T	F	0.612244897959184	1	1	0	F	NA	ENSG00000198712	MT-CO2	+	protein_coding	NA	NA	NA	NA	NA	NA	NA	NA	NA	NA	NA	NA	T	F
CCCATCTGTCCGTCCTCGTCCTGGCTCGAAA	4	CCCATCTGTCCGTCCTCGTCCTGGCTCGAAAGCC	34	0.0424411503746878	42.35913	2.436667	-4.119692	T	10487	chr7	101156705	101156721	NA	17S17M	0	0	0	0	0	17	F	T	0.5	1	2	0	F	NA	ENSG00000106367	AP1S1	+	protein_coding	NA	NA	NA	NA	NA	NA	NA	NA	NA	NA	NA	NA	T	F
CGACGTTGGACCGGATCGCCCGAACGACGAA	16	GTTCAGCTCCCAGTTCGTCGTTCGGGCGATCCGGTCCAACGTCGAC	46	0.0254466199184065	1.079565	8.797	3.026562	F	NA	NA	NA	NA	NA	NA	NA	NA	NA	NA	NA	NA	NA	NA	NA	NA	NA	NA	F	NA	NA	NA	NA	NA	NA	NA	NA	NA	NA	NA	NA	NA	NA	NA	NA	NA	NA	NA
AGGCTCACCCGAGACTCGCCGTCGTGCAGCG	44	GGTGAGCTCGCTGCACGACGGCGAGTCTCGGGTGAGCCTCATGAGTGAGGGTAACCCACCACACCGATCCTTGCC	75	0.029166975915784	48.857826	1	-5.610518	F	NA	NA	NA	NA	NA	NA	NA	NA	NA	NA	NA	NA	NA	NA	NA	NA	NA	NA	F	NA	NA	NA	NA	NA	NA	NA	NA	NA	NA	NA	NA	NA	NA	NA	NA	NA	NA	NA
CATTGACCGCAGTCCAGGAATGGTTCCCGCG	6	CCGTCGCGGGAACCATTCCTGGACTGCGGTCAATGA	36	0.0174555956975641	71.907826	1	-6.168077	F	NA	NA	NA	NA	NA	NA	NA	NA	NA	NA	NA	NA	NA	NA	NA	NA	NA	NA	F	NA	NA	NA	NA	NA	NA	NA	NA	NA	NA	NA	NA	NA	NA	NA	NA	NA	NA	NA
ATATTCCATTCCATTGCATTCCATTCCATTC	6	CGGAATATTCCATTCCATTGCATTCCATTCCATTCGGGTA	40	0.027340257967484	205.063913	4.832333	-5.40721	T	6610	chr4	49123921	49123954	NA	6S34M	0	0	0	1	0	6	F	T	0.85	0.970588235294118	1	1	F	NA	NA	NA	NA	NA	NA	NA	NA	NA	ENSG00000109182	+	CWH43	61841	ENSG00000249828	-	AC118282.3	79216	NA	NA
CAGGTGGAATGGCGGTGGGCGTTGGAATCTC	6	GTCGGAGATTCCAACGCCCACCGCCATTCCACCTGA	36	0.0289833711645763	70.376522	3.986667	-4.141839	F	NA	NA	NA	NA	NA	NA	NA	NA	NA	NA	NA	NA	NA	NA	NA	NA	NA	NA	F	NA	NA	NA	NA	NA	NA	NA	NA	NA	NA	NA	NA	NA	NA	NA	NA	NA	NA	NA
ACGCCAAGTCCGGCAAGGGCCTGAAGGCGCC	50	GCACGGTCGCGTCATCGCGCGTGACGTCGACGACGCCAAGTCCGGCAAGGGCCTGAAGGCGCCGGCGGCCGCGCCCGCGG	80	0.0443253489696645	18.126087	1	-4.179996	F	NA	NA	NA	NA	NA	NA	NA	NA	NA	NA	NA	NA	NA	NA	NA	NA	NA	NA	F	NA	NA	NA	NA	NA	NA	NA	NA	NA	NA	NA	NA	NA	NA	NA	NA	NA	NA	NA
CGGGGGGAGTTCCCACCGCCGGATCGCTACG	4	TCGGGGGGAGTTCCCACCGCCGGATCGCTACGAC	34	0.0288526947548136	65.47913	1	-6.032963	F	NA	NA	NA	NA	NA	NA	NA	NA	NA	NA	NA	NA	NA	NA	NA	NA	NA	NA	F	NA	NA	NA	NA	NA	NA	NA	NA	NA	NA	NA	NA	NA	NA	NA	NA	NA	NA	NA
ACGCCTTCGCGTTCATTTGATACGTATACGT	5	CGACGCCTTCGCGTTCATTTGATACGTATACGTAC	35	0.0304430837773065	6.758261	1	-2.756652	F	NA	NA	NA	NA	NA	NA	NA	NA	NA	NA	NA	NA	NA	NA	NA	NA	NA	NA	F	NA	NA	NA	NA	NA	NA	NA	NA	NA	NA	NA	NA	NA	NA	NA	NA	NA	NA	NA
CCGACAAGAGCACCACCCAGTACACGGTCAG	9	ATCCGACAAGAGCACCACCCAGTACACGGTCAGGGGGAG	39	0.0487178913302459	26.896957	1	-4.749371	F	NA	NA	NA	NA	NA	NA	NA	NA	NA	NA	NA	NA	NA	NA	NA	NA	NA	NA	F	NA	NA	NA	NA	NA	NA	NA	NA	NA	NA	NA	NA	NA	NA	NA	NA	NA	NA	NA
CCCTGGTAGTCCACGCCGTAAACGATGAGAA	5	CTAGTTCTCATCGTTTACGGCGTGGACTACCAGGG	35	0.0188401410791291	75.592174	1.395667	-5.75921	T	10835	chr5	7426238	7426255	NA	18M17S	0	0	0	2	17	0	T	F	0.514285714285714	0.888888888888889	1	2	F	NA	ENSG00000078295	ADCY2	+	protein_coding	NA	NA	NA	NA	NA	NA	NA	NA	NA	NA	NA	NA	F	T
AGGAATCGCCGGGCCACCTCGTGCGCGGTCG	10	CAGGAATCGCCGGGCCACCTCGTGCGCGGTCGGAGCATCG	40	0.00601971269054639	10.721304	1	-3.422408	F	NA	NA	NA	NA	NA	NA	NA	NA	NA	NA	NA	NA	NA	NA	NA	NA	NA	NA	F	NA	NA	NA	NA	NA	NA	NA	NA	NA	NA	NA	NA	NA	NA	NA	NA	NA	NA	NA
CGCCATTCGGACGCGACATGGAAACCAAGCG	70	GCGAGTTCGGCATGGGCGAGAGCGCCTCGATCACCGAGCTGACGCCATTCGGACGCGACATGGAAACCAAGCGTGAGGTGTTCGAGGAAGCGGTCGAGGCGA	102	0.00813605426283561	78.341739	1.052333	-6.218118	F	NA	NA	NA	NA	NA	NA	NA	NA	NA	NA	NA	NA	NA	NA	NA	NA	NA	NA	F	NA	NA	NA	NA	NA	NA	NA	NA	NA	NA	NA	NA	NA	NA	NA	NA	NA	NA	NA
AGTGGAAGTTCGACGATGCCACCTACGACCG	30	TCGCCTCGCCGCAGTGGAAGTTCGACGATGCCACCTACGACCGCAGCGCTGTTGCCTTCG	60	0	54.308261	1	-5.7631	F	NA	NA	NA	NA	NA	NA	NA	NA	NA	NA	NA	NA	NA	NA	NA	NA	NA	NA	F	NA	NA	NA	NA	NA	NA	NA	NA	NA	NA	NA	NA	NA	NA	NA	NA	NA	NA	NA
TCGAGCCCATGATCGGCCGAGTTGCGCACCA	16	CACATGGTGCGCAACTCGGCCGATCATGGGCTCGAGACCACCGCCG	46	0.0244087119120234	18.706522	1	-4.225469	F	NA	NA	NA	NA	NA	NA	NA	NA	NA	NA	NA	NA	NA	NA	NA	NA	NA	NA	F	NA	NA	NA	NA	NA	NA	NA	NA	NA	NA	NA	NA	NA	NA	NA	NA	NA	NA	NA
ACGCCGCGAGAAGAATGAAGAGCCGAAAAGC	16	CCGGTCGTCCGCGCACGCCGCGAGAAGAATGAAGAGCCGAAAAGCG	46	0.0212528406903925	1	9.237667	3.207529	F	NA	NA	NA	NA	NA	NA	NA	NA	NA	NA	NA	NA	NA	NA	NA	NA	NA	NA	F	NA	NA	NA	NA	NA	NA	NA	NA	NA	NA	NA	NA	NA	NA	NA	NA	NA	NA	NA
CGTGCGACCTACTACACTAAAGTACTATAGC	12	CGTGCGACCTACTACACTAAAGTACTATAGCCCCTATAATAA	42	0.00919235951686797	52.208261	1	-5.706206	F	NA	NA	NA	NA	NA	NA	NA	NA	NA	NA	NA	NA	NA	NA	NA	NA	NA	NA	F	NA	NA	NA	NA	NA	NA	NA	NA	NA	NA	NA	NA	NA	NA	NA	NA	NA	NA	NA
CGACGACAGTTGTAAACATCGTCGGGTTGTC	2	GACAACCCGACGATGTTTACAACTGTCGTCGC	32	0.0327197071459083	1	6.486	2.697329	F	NA	NA	NA	NA	NA	NA	NA	NA	NA	NA	NA	NA	NA	NA	NA	NA	NA	NA	F	NA	NA	NA	NA	NA	NA	NA	NA	NA	NA	NA	NA	NA	NA	NA	NA	NA	NA	NA
ATCAAGCCGCTGCTGAAATCGATGCCGAAAG	14	GGAGACCATCAAGCCGCTGCTGAAATCGATGCCGAAAGCCGACG	44	0.0259859232736573	1	6.362333	2.669556	F	NA	NA	NA	NA	NA	NA	NA	NA	NA	NA	NA	NA	NA	NA	NA	NA	NA	NA	F	NA	NA	NA	NA	NA	NA	NA	NA	NA	NA	NA	NA	NA	NA	NA	NA	NA	NA	NA
ACGATCTGCGCGGTCGGATTGAGGGCCCGGA	30	CCGACAACGAGAAGCTGGTGCGCCACGTCCGGGCCCTCAATCCGACCGCGCAGATCGTCG	60	0.0102635057903666	55.309565	1	-5.789457	F	NA	NA	NA	NA	NA	NA	NA	NA	NA	NA	NA	NA	NA	NA	NA	NA	NA	NA	F	NA	NA	NA	NA	NA	NA	NA	NA	NA	NA	NA	NA	NA	NA	NA	NA	NA	NA	NA
CCGGCAACATATCCGGGATATGGTGCTTCCG	4	GACCGGCAACATATCCGGGATATGGTGCTTCCGT	34	0.0301029908788949	15.958261	2.249	-2.826948	T	11339	chr13	32214863	32214879	NA	17M17S	0	0	0	1	17	0	T	F	0.5	0.941176470588235	1	1	F	NA	ENSG00000073910	FRY	+	protein_coding	NA	NA	NA	NA	NA	NA	NA	NA	NA	NA	NA	NA	F	T
CGAACATCGTGCCGAGGAACAGCGCAAAGCC	9	GCGCGAACATCGTGCCGAGGAACAGCGCAAAGCCGTCGGGATA	43	0.0341891057269618	65.935217	2.582	-4.674488	F	NA	NA	NA	NA	NA	NA	NA	NA	NA	NA	NA	NA	NA	NA	NA	NA	NA	NA	F	NA	NA	NA	NA	NA	NA	NA	NA	NA	NA	NA	NA	NA	NA	NA	NA	NA	NA	NA
CCTCGCGCCCGGTACCCGAACTCTCGTTCAA	19	GCAGGCCATTCGGCCTCGCGCCCGGTACCCGAACTCTCGTTCAAGCTCAACCAATATA	58	0.0110005332614046	1.356522	11.361667	3.06619	F	NA	NA	NA	NA	NA	NA	NA	NA	NA	NA	NA	NA	NA	NA	NA	NA	NA	NA	F	NA	NA	NA	NA	NA	NA	NA	NA	NA	NA	NA	NA	NA	NA	NA	NA	NA	NA	NA
GACGATATCCGGGTCGCAGGGCTAGCCAACC	1	GACGATATCCGGGTCGCAGGGCTAGCCAACC	31	0.0478465225668588	83.746087	1.310333	-5.998016	T	16670	chr19	53038896	53038913	NA	13S18M	0	0	0	2	0	13	F	T	0.580645161290323	0.888888888888889	1	2	F	NA	NA	NA	NA	NA	NA	NA	NA	NA	ENSG00000242779	-	ZNF702P	999	ENSG00000268964	+	ERVV-2	5824	NA	NA
AATCGGTGAACGTCCACGAAGACATCAAGCT	7	CCAAGCTTGATGTCTTCGTGGACGTTCACCGATTCAAT	38	0.049574074476739	42.334783	1.385333	-4.933539	F	NA	NA	NA	NA	NA	NA	NA	NA	NA	NA	NA	NA	NA	NA	NA	NA	NA	NA	F	NA	NA	NA	NA	NA	NA	NA	NA	NA	NA	NA	NA	NA	NA	NA	NA	NA	NA	NA
AGCAATGTATGGATTGCGCGCGGATATGCGC	2	AGCAATGTATGGATTGCGCGCGGATATGCGCA	32	0.0468497452943865	7.296957	1	-2.867295	F	NA	NA	NA	NA	NA	NA	NA	NA	NA	NA	NA	NA	NA	NA	NA	NA	NA	NA	F	NA	NA	NA	NA	NA	NA	NA	NA	NA	NA	NA	NA	NA	NA	NA	NA	NA	NA	NA
CGACCTGCGGCTTGATGTTGGTCCACTTCAG	2	TCGACCTGCGGCTTGATGTTGGTCCACTTCAG	32	0.0440947639985692	16.602609	2.588667	-2.681129	T	12811	chrX	71671956	71671974	NA	4S19M9S	0	0	0	0	9	4	T	T	0.59375	1	1	0	F	NA	NA	NA	NA	NA	NA	NA	NA	NA	ENSG00000283599	+	BX276092.9	433	ENSG00000230934	+	BX276092.4	19957	NA	NA
GGGGAGGGCTGGGGTGGGGGTATCTCCACAA	2	GGGGGAGGGCTGGGGTGGGGGTATCTCCACAA	32	0.0293668809133307	7.166087	1.091	-2.715534	T	19244	chr6	130505623	130505643	NA	21M11S	0	0	0	1	11	0	T	F	0.65625	0.952380952380952	1	1	F	NA	NA	NA	NA	NA	NA	NA	NA	NA	ENSG00000164484	+	TMEM200A	62561	ENSG00000202438	-	RF00019	68352	NA	NA
CGATACGCCGATCGAGTTTCAAGCCAGCCCC	1	CGATACGCCGATCGAGTTTCAAGCCAGCCCC	31	0.0427698107355557	21.782174	2.051667	-3.408279	T	13261	chr6	133239491	133239508	NA	18M13S	0	0	0	2	13	0	T	F	0.580645161290323	0.888888888888889	1	2	F	NA	NA	NA	NA	NA	NA	NA	NA	NA	ENSG00000220113	+	MTCYBP4	88676	ENSG00000112319	+	EYA4	1089	NA	NA
GCATGTCGACCTGACGCTGACGTTCCGGCAC	4	GAGCATGTCGACCTGACGCTGACGTTCCGGCACG	34	0.0292061009648741	6.79913	1.051	-2.693587	F	NA	NA	NA	NA	NA	NA	NA	NA	NA	NA	NA	NA	NA	NA	NA	NA	NA	NA	F	NA	NA	NA	NA	NA	NA	NA	NA	NA	NA	NA	NA	NA	NA	NA	NA	NA	NA	NA
ATGGAATGGAATGGAATGGAATGTAACGGAA	1	ATGGAATGGAATGGAATGGAATGTAACGGAA	31	0.0281750030356414	90.56087	1	-6.500816	T	7937	chr10	41892440	41892470	NA	31M	0	0	0	1	0	0	F	F	1	0.967741935483871	1	1	F	NA	NA	NA	NA	NA	NA	NA	NA	NA	ENSG00000233832	+	AL590623.1	3109333	ENSG00000229485	-	KSR1P1	256839	NA	NA
CCATTCCAGTCCATTCAATGATTCCATCTGA	7	AATGATTCCATTCCAGTCCATTCAATGATTCCATCTGATT	40	0.0450664987175632	1220.535217	14.276333	-6.417745	T	10312	chr1	125182249	125182288	NA	40M	0	0	0	1	0	0	F	F	1	0.975	18	1	F	NA	NA	NA	NA	NA	NA	NA	NA	NA	ENSG00000224857	-	LINC01691	3601726	ENSG00000276118	+	AC242852.1	18160891	NA	NA
AGCATCGAATGGAATCGAATGGAATCATCAA	1	AGCATCGAATGGAATCGAATGGAATCATCAA	31	0.0321516855737471	147.36913	1	-7.203291	T	4661	chr1	125079956	125079986	NA	31M	0	0	0	1	0	0	F	F	1	0.967741935483871	63	1	F	NA	NA	NA	NA	NA	NA	NA	NA	NA	ENSG00000224857	-	LINC01691	3499433	ENSG00000276118	+	AC242852.1	18263193	NA	NA
CCTGACACTTGCCTTAGCAGTGCCTGCTACC	24	CTGTAGCCCTGCTGGCCCTGACACTTGCCTTAGCAGTGCCTGCTACCGCATCCG	54	0.0185187946253044	44.46	1.124333	-5.305367	F	NA	NA	NA	NA	NA	NA	NA	NA	NA	NA	NA	NA	NA	NA	NA	NA	NA	NA	F	NA	NA	NA	NA	NA	NA	NA	NA	NA	NA	NA	NA	NA	NA	NA	NA	NA	NA	NA
GATAGTAGATTCTTCATCTACTGGGTTTCCC	14	AAGTGATAGTAGATTCTTCATCTACTGGGTTTCCCCATTCGGACATCCCCGGATCAC	57	0.00628985007746395	44.871739	1.182	-5.246505	F	NA	NA	NA	NA	NA	NA	NA	NA	NA	NA	NA	NA	NA	NA	NA	NA	NA	NA	F	NA	NA	NA	NA	NA	NA	NA	NA	NA	NA	NA	NA	NA	NA	NA	NA	NA	NA	NA
CAAGCCGGCGATGACGGTGTGGAATGACGAC	1	CAAGCCGGCGATGACGGTGTGGAATGACGAC	31	0.0454056649175773	12.016522	1	-3.586947	F	NA	NA	NA	NA	NA	NA	NA	NA	NA	NA	NA	NA	NA	NA	NA	NA	NA	NA	F	NA	NA	NA	NA	NA	NA	NA	NA	NA	NA	NA	NA	NA	NA	NA	NA	NA	NA	NA
GCCCCCCTTTTCCCCTCCCCGCCCCTCTCCC	4	GGGAGAGGGGCGGGGAGGGGAAAAGGGGGGCCCC	34	0.0443253489696645	1	158.845333	7.311479	T	17632	chr19	41449132	41449156	NA	5S25M4S	0	0	0	1	4	5	T	T	0.735294117647059	0.96	1	1	F	NA	NA	NA	NA	NA	NA	NA	NA	NA	ENSG00000204978	+	ERICH4	4368	ENSG00000267107	-	PCAT19	363	NA	NA
CCGTCTGTTAGAGTGCAATGGCATAAGCCAG	7	ACCGTCTGTTAGAGTGCAATGGCATAAGCCAGCCTGA	37	0.028965030231571	58.658261	1.684667	-5.121799	F	NA	NA	NA	NA	NA	NA	NA	NA	NA	NA	NA	NA	NA	NA	NA	NA	NA	NA	F	NA	NA	NA	NA	NA	NA	NA	NA	NA	NA	NA	NA	NA	NA	NA	NA	NA	NA	NA
ACCGACATGCGGTGACCACCCGGCGTGATCA	12	GGTCATCGCCACCGACATGCGGTGACCACCCGGCGTGATCAG	42	0.0335694674499797	10.327391	2.385667	-2.114011	F	NA	NA	NA	NA	NA	NA	NA	NA	NA	NA	NA	NA	NA	NA	NA	NA	NA	NA	F	NA	NA	NA	NA	NA	NA	NA	NA	NA	NA	NA	NA	NA	NA	NA	NA	NA	NA	NA
CCGCCCGGTGTGGGCAAGACCTCGGTCGCGC	52	GTCGCCTGATCAGCGTCGTCGGGCCGCCCGGTGTGGGCAAGACCTCGGTCGCGCTTCGGCTTGCGGAATCGCTGCTGCCGCA	82	0.0110005332614046	20.658696	1	-4.368677	F	NA	NA	NA	NA	NA	NA	NA	NA	NA	NA	NA	NA	NA	NA	NA	NA	NA	NA	F	NA	NA	NA	NA	NA	NA	NA	NA	NA	NA	NA	NA	NA	NA	NA	NA	NA	NA	NA
AGATCGCCGGAAATGATAGGAAGCACAATGG	25	CTGAAGTTGAAAGCCGGCGATCCGGCCATTGTGCTTCCTATCATTTCCGGCGATCTCAGCTA	62	0.00169152547153182	40.414783	1.074333	-5.23337	F	NA	NA	NA	NA	NA	NA	NA	NA	NA	NA	NA	NA	NA	NA	NA	NA	NA	NA	F	NA	NA	NA	NA	NA	NA	NA	NA	NA	NA	NA	NA	NA	NA	NA	NA	NA	NA	NA
ATGGTGCTGGACTCGACGGTGAACATCACGA	2	ATGGTGCTGGACTCGACGGTGAACATCACGAA	32	0.0309997343978843	45.287826	1	-5.501051	F	NA	NA	NA	NA	NA	NA	NA	NA	NA	NA	NA	NA	NA	NA	NA	NA	NA	NA	F	NA	NA	NA	NA	NA	NA	NA	NA	NA	NA	NA	NA	NA	NA	NA	NA	NA	NA	NA
ATCGGCCGCTCCCTTCCGAACGAAGTCTATC	23	CCACCAAAATCGTATCGGCCGCTCCCTTCCGAACGAAGTCTATCGCCAATCCGTTTC	57	0.0331057006446709	1	8.253333	3.044977	F	NA	NA	NA	NA	NA	NA	NA	NA	NA	NA	NA	NA	NA	NA	NA	NA	NA	NA	F	NA	NA	NA	NA	NA	NA	NA	NA	NA	NA	NA	NA	NA	NA	NA	NA	NA	NA	NA
GATGCCGGCCGCGCAGAACGCGGTGCTGGGC	6	CCGCGCCCAGCACCGCGTTCTGCGCGGCCGGCATCG	36	0.0458285303139723	9.306087	2.164333	-2.104252	F	NA	NA	NA	NA	NA	NA	NA	NA	NA	NA	NA	NA	NA	NA	NA	NA	NA	NA	F	NA	NA	NA	NA	NA	NA	NA	NA	NA	NA	NA	NA	NA	NA	NA	NA	NA	NA	NA
CTCGCCAAGGCGAGCGACCTCTATCGCAACC	7	GCTCGCCAAGGCGAGCGACCTCTATCGCAACCCGCAG	37	0.0112964541381904	12.415652	1	-3.634088	T	15638	chr11	121618807	121618827	NA	16S21M	0	0	0	1	0	16	F	T	0.567567567567568	0.952380952380952	1	1	F	NA	ENSG00000137642	SORL1	+	protein_coding	NA	NA	NA	NA	NA	NA	NA	NA	NA	NA	NA	NA	T	F
CCGGCCCGCAGGCGGCGCTCGTCGCCTTCGC	22	AGCGCACGGCGAAGGCGACGAGCGCCGCCTGCGGGCCGGTCTGCGGGGCGGC	52	0.0396960238102913	1	8.311	3.055022	F	NA	NA	NA	NA	NA	NA	NA	NA	NA	NA	NA	NA	NA	NA	NA	NA	NA	NA	F	NA	NA	NA	NA	NA	NA	NA	NA	NA	NA	NA	NA	NA	NA	NA	NA	NA	NA	NA
CCTGTTATTGCCTCAAACTTCCAATGGCTAA	30	CACAGACCTGTTATTGCCTCAAACTTCCAATGGCTAAACGCCAATAGTCCCTCTAAGAAG	60	0.0146397925170068	26.863478	1	-4.747574	F	NA	NA	NA	NA	NA	NA	NA	NA	NA	NA	NA	NA	NA	NA	NA	NA	NA	NA	F	NA	NA	NA	NA	NA	NA	NA	NA	NA	NA	NA	NA	NA	NA	NA	NA	NA	NA	NA
AAGATACGGTGATCGACCTAGCGGACGACTG	10	GATCATTGTAAGATACGGTGATCGACCTAGCGGACGACTG	40	0.0388030844970833	1.286522	15.193667	3.561922	F	NA	NA	NA	NA	NA	NA	NA	NA	NA	NA	NA	NA	NA	NA	NA	NA	NA	NA	F	NA	NA	NA	NA	NA	NA	NA	NA	NA	NA	NA	NA	NA	NA	NA	NA	NA	NA	NA
AGTCGAAGCGCGGCGATAAGACCTTGTTTTG	4	CAAAACAAGGTCTTATCGCCGCGCTTCGACTTTT	34	0.0384643507681299	11.95087	1.097667	-3.444603	F	NA	NA	NA	NA	NA	NA	NA	NA	NA	NA	NA	NA	NA	NA	NA	NA	NA	NA	F	NA	NA	NA	NA	NA	NA	NA	NA	NA	NA	NA	NA	NA	NA	NA	NA	NA	NA	NA
GAACTTTTCTTCCTATAGAGCAGTTATGAAA	5	GAACTTTTCTTCCTATAGAGCAGTTATGAAACAGT	35	0.0484684241314819	62.226087	1	-5.959448	T	16414	chr3	91599059	91599093	NA	35M	0	0	0	1	0	0	F	F	1	0.971428571428571	84	1	F	NA	NA	NA	NA	NA	NA	NA	NA	NA	ENSG00000283544	-	ABBA01000935.2	85285	ENSG00000251727	+	RNU6-488P	2244670	NA	NA
CCGCCGAACCCGAACGAGTTCGACATCACGG	8	TTCTGCCCGCCGAACCCGAACGAGTTCGACATCACGGC	38	0.0163482848156561	40.914783	1.436667	-4.831825	F	NA	NA	NA	NA	NA	NA	NA	NA	NA	NA	NA	NA	NA	NA	NA	NA	NA	NA	F	NA	NA	NA	NA	NA	NA	NA	NA	NA	NA	NA	NA	NA	NA	NA	NA	NA	NA	NA
CCGCCTTCACCATGCCGAGCTTGATGTCGTC	11	CCGCCTTCACCATGCCGAGCTTGATGTCGTCGAGCAGCCCG	41	0.0238601409081441	1	6.879667	2.782339	F	NA	NA	NA	NA	NA	NA	NA	NA	NA	NA	NA	NA	NA	NA	NA	NA	NA	NA	F	NA	NA	NA	NA	NA	NA	NA	NA	NA	NA	NA	NA	NA	NA	NA	NA	NA	NA	NA
ACGCGTCACGCCAGAGGTACGAGGTAAGATG	3	TGACGCGTCACGCCAGAGGTACGAGGTAAGATG	33	0.0477125167097935	98.849565	3.127667	-4.982076	T	3116	chr5	135058020	135058035	NA	16M17S	0	0	0	1	17	0	T	F	0.484848484848485	0.9375	1	1	F	NA	ENSG00000224186	C5orf66	+	lncRNA	NA	NA	NA	NA	NA	NA	NA	NA	NA	NA	NA	NA	F	T
CCTCGCCGAGATGGAGGAAGTGCTTCCGGAG	2	CCCTCGCCGAGATGGAGGAAGTGCTTCCGGAG	32	0.049706766391915	71.034783	1.285	-5.788685	F	NA	NA	NA	NA	NA	NA	NA	NA	NA	NA	NA	NA	NA	NA	NA	NA	NA	NA	F	NA	NA	NA	NA	NA	NA	NA	NA	NA	NA	NA	NA	NA	NA	NA	NA	NA	NA	NA
AGCTTTGGGGCTCTCATTCGGCTCGGCGGGG	24	CCCCCGCCGAGCCGAATGAGAGCCCCAAAGCTACAGGTCCCTACGAGCGCCATC	54	0.0431026974570735	1	5.496	2.458382	F	NA	NA	NA	NA	NA	NA	NA	NA	NA	NA	NA	NA	NA	NA	NA	NA	NA	NA	F	NA	NA	NA	NA	NA	NA	NA	NA	NA	NA	NA	NA	NA	NA	NA	NA	NA	NA	NA
CCAAGGAGTCGCTCAAGGGCGTGCTGCAGCA	28	CCTTCGACGACAAGGGTGAACTGACCAAGGAGTCGCTCAAGGGCGTGCTGCAGCAATATCTCG	63	0.00853017823014356	9.605217	1.124333	-3.094749	F	NA	NA	NA	NA	NA	NA	NA	NA	NA	NA	NA	NA	NA	NA	NA	NA	NA	NA	F	NA	NA	NA	NA	NA	NA	NA	NA	NA	NA	NA	NA	NA	NA	NA	NA	NA	NA	NA
ACGCCAGCGGTGCCCTTGCCCTTGCTGGTGC	2	ACGCCAGCGGTGCCCTTGCCCTTGCTGGTGCC	32	0.0295741351148014	61.016957	1.065333	-5.839834	T	2896	chr2	14434970	14434990	NA	21M11S	0	0	0	2	11	0	T	F	0.65625	0.904761904761905	2	2	F	NA	NA	NA	NA	NA	NA	NA	NA	NA	ENSG00000230448	-	LINC00276	34008	ENSG00000237261	+	RF00017	95950	NA	NA
GCCGAGGAGTCCTGGCGCTGAACTCGCAGTA	6	CGCCGAGGAGTCCTGGCGCTGAACTCGCAGTATCGG	36	0.00900958210993513	20.214348	2.884667	-2.808903	T	17676	chr15	65378522	65378541	NA	20M16S	0	0	0	2	16	0	T	F	0.555555555555556	0.9	1	2	F	NA	NA	NA	NA	NA	NA	NA	NA	NA	ENSG00000174498	-	IGDCC3	521	ENSG00000103742	-	IGDCC4	2942	NA	NA
GCGTCGGCGTCGAGTGGACCAACCAGTACAA	7	CACCTTGTACTGGTTGGTCCACTCGACGCCGACGCGC	37	0.047893639986098	1	7.299333	2.867765	T	18377	chr12	105104238	105104255	NA	19S18M	0	0	0	2	0	19	F	T	0.486486486486487	0.888888888888889	1	2	F	NA	ENSG00000136010	ALDH1L2	-	protein_coding	NA	NA	NA	NA	NA	NA	NA	NA	NA	NA	NA	NA	F	T
GAGCTGCGTGAGCAGGAAACCTGCTCGCAGA	19	CCGGCTGCTCTGCGAGCAGGTTTCCTGCTCACGCAGCTCTTCGGTTTTC	49	0.0202119753726507	1	10.318667	3.367185	F	NA	NA	NA	NA	NA	NA	NA	NA	NA	NA	NA	NA	NA	NA	NA	NA	NA	NA	F	NA	NA	NA	NA	NA	NA	NA	NA	NA	NA	NA	NA	NA	NA	NA	NA	NA	NA	NA
ATTCCCCTGCTGTCGGGTTGTTTCCATTCCA	21	GAGAGGAATGGAATGGAATGGAATGGAAACAACCCGACAGCAGGGGAATGGAATGGAATGGAATGGAAACAAC	73	0.0281056701653372	87.78913	1	-6.45597	T	8361	GL000216.2	12127	16351	NA	29M4156N40M4S	0	0	1	6	4	0	T	F	0.945205479452055	0.91304347826087	1	6	F	NA	NA	NA	NA	NA	NA	NA	NA	NA	NA	NA	NA	NA	NA	NA	NA	NA	NA	NA
GGGCCAACCGCCTGAAATCTGTCTGCGCGAA	2	GGGCCAACCGCCTGAAATCTGTCTGCGCGAAA	32	0.0311961272582887	30.905217	3.11	-3.312864	T	19197	chr22	16549437	16549452	NA	9S16M7S	0	0	0	0	7	9	T	T	0.5	1	1	0	F	NA	NA	NA	NA	NA	NA	NA	NA	NA	ENSG00000273362	+	AP000547.2	22201	ENSG00000233995	+	AP000547.1	22574	NA	NA
TATTGGGGCGGCATGGGTTTTACCAACGAGA	6	TATTGGGGCGGCATGGGTTTTACCAACGAGACCCCGGTCAGC	42	0.0460074628185772	1	5.026333	2.329506	F	NA	NA	NA	NA	NA	NA	NA	NA	NA	NA	NA	NA	NA	NA	NA	NA	NA	NA	F	NA	NA	NA	NA	NA	NA	NA	NA	NA	NA	NA	NA	NA	NA	NA	NA	NA	NA	NA
TCGCCGCTGGCCGGCCGCAAGCCCGGCGACA	10	CCGTCGCCGCTGGCCGGCCGCAAGCCCGGCGACATCGACT	40	0.0134695580629488	14.078696	1	-3.815442	F	NA	NA	NA	NA	NA	NA	NA	NA	NA	NA	NA	NA	NA	NA	NA	NA	NA	NA	F	NA	NA	NA	NA	NA	NA	NA	NA	NA	NA	NA	NA	NA	NA	NA	NA	NA	NA	NA
AACCTCCAGCCCGGTCGGGTCGTTGGCCGGG	20	CAACCTCCAGCCCGGTCGGGTCGTTGGCCGGGTAGAGCGCTCCGCGCGAGATTGAC	56	0.0157894265734266	1	8.097	3.017387	F	NA	NA	NA	NA	NA	NA	NA	NA	NA	NA	NA	NA	NA	NA	NA	NA	NA	NA	F	NA	NA	NA	NA	NA	NA	NA	NA	NA	NA	NA	NA	NA	NA	NA	NA	NA	NA	NA
GTGGCGGGGCGCACGTCAGTCGCGGTGACGA	69	CTGGGCGCCGTCGTCACCGCGACTGACGTGCGCCCCGCCACCAAGGAGCAGGTGGAATCGCTCGGTGCAAAGTTCCTCGCCGTCGAGGACGAGGAGTTCAA	101	0.0203838112821823	16.988261	1.062333	-3.99923	F	NA	NA	NA	NA	NA	NA	NA	NA	NA	NA	NA	NA	NA	NA	NA	NA	NA	NA	F	NA	NA	NA	NA	NA	NA	NA	NA	NA	NA	NA	NA	NA	NA	NA	NA	NA	NA	NA
ACTGCCGCACATTCTAGAGCATGATCCGACC	30	CTCAAAACTACTGCCGCACATTCTAGAGCATGATCCGACCCGATTGAATCGGATCATGGC	60	0.00436579799818016	23.73913	2.031	-3.547005	F	NA	NA	NA	NA	NA	NA	NA	NA	NA	NA	NA	NA	NA	NA	NA	NA	NA	NA	F	NA	NA	NA	NA	NA	NA	NA	NA	NA	NA	NA	NA	NA	NA	NA	NA	NA	NA	NA
CAAGGAATATCGCGAGAAGATGGTGGAAGCC	10	GGCCAAGGAATATCGCGAGAAGATGGTGGAAGCCGCCGTC	40	0.0414110061474576	14.873043	1.382667	-3.427174	F	NA	NA	NA	NA	NA	NA	NA	NA	NA	NA	NA	NA	NA	NA	NA	NA	NA	NA	F	NA	NA	NA	NA	NA	NA	NA	NA	NA	NA	NA	NA	NA	NA	NA	NA	NA	NA	NA
GTCACCAGCAAGCAGAACGACAGTGCGTTCA	13	AACGTCACCAGCAAGCAGAACGACAGTGCGTTCAGCGGCCGCG	43	0.0476971739679985	6.285652	1.069333	-2.555351	F	NA	NA	NA	NA	NA	NA	NA	NA	NA	NA	NA	NA	NA	NA	NA	NA	NA	NA	F	NA	NA	NA	NA	NA	NA	NA	NA	NA	NA	NA	NA	NA	NA	NA	NA	NA	NA	NA
AGCGATAGGGCGAGGTGCTTCCCACCGTGGC	4	GCGGCCGCGCACAGCGATAGGGCGAGGTGCTTCCCACCGTGGC	43	0.0453751419173097	21.491739	1.076	-4.320032	F	NA	NA	NA	NA	NA	NA	NA	NA	NA	NA	NA	NA	NA	NA	NA	NA	NA	NA	F	NA	NA	NA	NA	NA	NA	NA	NA	NA	NA	NA	NA	NA	NA	NA	NA	NA	NA	NA
AGGCCGGTCAAGAGCGAAATGATCGCGAAGG	9	GTCGCGACCTTCGCGATCATTTCGCTCTTGACCGGCCTG	39	0.0267272234796777	11.066087	1	-3.468073	F	NA	NA	NA	NA	NA	NA	NA	NA	NA	NA	NA	NA	NA	NA	NA	NA	NA	NA	F	NA	NA	NA	NA	NA	NA	NA	NA	NA	NA	NA	NA	NA	NA	NA	NA	NA	NA	NA
TCATCGGGTCGATCGTCCAGCAGCTTCGAAA	1	TCATCGGGTCGATCGTCCAGCAGCTTCGAAA	31	0.0488569821958923	9.020435	1.509333	-2.579286	T	20213	chr6	137439814	137439829	NA	15S16M	0	0	0	1	0	15	F	T	0.516129032258065	0.9375	1	1	F	NA	NA	NA	NA	NA	NA	NA	NA	NA	ENSG00000027697	-	IFNGR1	220366	ENSG00000177468	-	OLIG3	52372	NA	NA
CACAATGTCTCCTTAGTAGTTTCGAACGTGG	25	GGGACACAATGTCTCCTTAGTAGTTTCGAACGTGGCGTCAGGACGAGCGAGAAAC	55	0.0195418635070771	51.01	1	-5.672708	F	NA	NA	NA	NA	NA	NA	NA	NA	NA	NA	NA	NA	NA	NA	NA	NA	NA	NA	F	NA	NA	NA	NA	NA	NA	NA	NA	NA	NA	NA	NA	NA	NA	NA	NA	NA	NA	NA
GGCACCAGGAGCTGACCGCGCCGAGCCCGGA	3	GGCACCAGGAGCTGACCGCGCCGAGCCCGGATG	33	0.036552987358808	43.462609	3.368333	-3.689668	T	18921	chr3	126714574	126714589	NA	16M17S	0	0	0	0	17	0	T	F	0.484848484848485	1	1	0	F	NA	ENSG00000159685	CHCHD6	+	protein_coding	NA	NA	NA	NA	NA	NA	NA	NA	NA	NA	NA	NA	F	T
ATCGACGATGATCCCGCGATGCGCGATTCGC	5	TGTTATCGACGATGATCCCGCGATGCGCGATTCGC	35	0.0434174441150549	40.92087	1.465	-4.803864	F	NA	NA	NA	NA	NA	NA	NA	NA	NA	NA	NA	NA	NA	NA	NA	NA	NA	NA	F	NA	NA	NA	NA	NA	NA	NA	NA	NA	NA	NA	NA	NA	NA	NA	NA	NA	NA	NA
ACGTTACTTGTTCAGAAAATTCAGCGGCAAT	8	CCCGGATTGCCGCTGAATTTTCTGAACAAGTAACGTAA	38	0.0293340554096976	49.602609	1	-5.632344	F	NA	NA	NA	NA	NA	NA	NA	NA	NA	NA	NA	NA	NA	NA	NA	NA	NA	NA	F	NA	NA	NA	NA	NA	NA	NA	NA	NA	NA	NA	NA	NA	NA	NA	NA	NA	NA	NA
GCCAAGACATTCCGCAGCACCGCGGCGGCGC	13	CCGCCAAGACATTCCGCAGCACCGCGGCGGCGCGGCGGGCCGG	43	0.0430280007839725	1	5.838333	2.545556	T	17536	chr12	116508530	116508551	NA	22M21S	0	0	0	1	21	0	T	F	0.511627906976744	0.954545454545455	1	1	F	NA	ENSG00000258018	LINC02457	+	lncRNA	NA	NA	NA	NA	NA	NA	NA	NA	NA	NA	NA	NA	F	T
ACCGGCCTGCTCGGTGGCAGTAGTGGCACCG	6	GCGACACCGGCCTGCTCGGTGGCAGTAGTGGCACCG	36	0.0446344732614679	1.061304	10.220333	3.267532	T	2519	chr12	107999714	107999731	NA	18S18M	0	0	0	0	0	18	F	T	0.5	1	1	0	F	NA	NA	NA	NA	NA	NA	NA	NA	NA	ENSG00000257129	-	AC126177.1	87095	ENSG00000075035	+	WSCD2	129556	NA	NA
AGCGACCCGCGCCCCGAGTTTCTCAACCGCT	52	TCGACGCGATAGCCGGCCGCATAGGAAGCGACCCGCGCCCCGAGTTTCTCAACCGCTGTCGTCAAGACTGTCATGTCAGCAC	82	0.0047321561601052	8.247391	1	-3.043938	F	NA	NA	NA	NA	NA	NA	NA	NA	NA	NA	NA	NA	NA	NA	NA	NA	NA	NA	F	NA	NA	NA	NA	NA	NA	NA	NA	NA	NA	NA	NA	NA	NA	NA	NA	NA	NA	NA
AGCGGGGGACCACCAGGTTGCCTAAGGAGGA	2	AGCGGGGGACCACCAGGTTGCCTAAGGAGGAG	32	0.0235347144380465	1.326087	15.36	3.533931	T	5013	chr14	49586728	49586759	NA	32M	0	0	0	1	0	0	F	F	1	0.96875	3	1	F	NA	ENSG00000276168	RN7SL1	+	misc_RNA	NA	NA	NA	NA	NA	NA	NA	NA	NA	NA	NA	NA	T	F
CGCGCTGGCGACGCGCAATGCCGGCTTCATC	6	ACGCGCTGGCGACGCGCAATGCCGGCTTCATCAATC	36	0.0475694177839068	1	5.157	2.366532	F	NA	NA	NA	NA	NA	NA	NA	NA	NA	NA	NA	NA	NA	NA	NA	NA	NA	NA	F	NA	NA	NA	NA	NA	NA	NA	NA	NA	NA	NA	NA	NA	NA	NA	NA	NA	NA	NA
GGCGATCGTCACCGACGCGCTCTATAGCGAC	113	CGGAGTGCGCAACCGCGGAGCTTGCGGCGACCTTGGCGCGCATCAATCCGAACGAGGCGATCGTCACCGACGCGCTCTATAGCGACAACGAGCTGGCGCCGACCTTGCGTGAGCTGCCATCGGTGACGCCGCTGACCCGCGAC	143	0.0285000810173915	13.959565	1	-3.803182	F	NA	NA	NA	NA	NA	NA	NA	NA	NA	NA	NA	NA	NA	NA	NA	NA	NA	NA	F	NA	NA	NA	NA	NA	NA	NA	NA	NA	NA	NA	NA	NA	NA	NA	NA	NA	NA	NA
ATGTCGCTAACGGGATGGGAAGCACTCGGGC	25	CACTGCCCGAGTGCTTCCCATCCCGTTAGCGACATCAAGAACATCCCTCGTCGAG	55	0.0152788404942966	44.089565	1.592333	-4.791223	F	NA	NA	NA	NA	NA	NA	NA	NA	NA	NA	NA	NA	NA	NA	NA	NA	NA	NA	F	NA	NA	NA	NA	NA	NA	NA	NA	NA	NA	NA	NA	NA	NA	NA	NA	NA	NA	NA
GCGGTCAAACTCAGGGGATGCAGACCCAGGA	3	GCGGTCAAACTCAGGGGATGCAGACCCAGGACG	33	0.0446858803418803	27.574783	1	-4.785278	T	18309	chr3	101706409	101706428	NA	20M13S	0	0	0	3	13	0	T	F	0.606060606060606	0.85	1	3	F	NA	NA	NA	NA	NA	NA	NA	NA	NA	ENSG00000286699	+	AC084198.2	5484	ENSG00000244119	+	PDCL3P4	6043	NA	NA
CCTTTCCATTACATTCGGATTGATTCTATTC	1	CCTTTCCATTACATTCGGATTGATTCTATTC	31	0.0375722686068233	288.632174	2.257	-6.998682	T	12312	chr12	105220706	105220724	NA	12S19M	0	0	0	1	0	12	F	T	0.612903225806452	0.947368421052632	1	1	F	NA	ENSG00000136044	APPL2	-	protein_coding	NA	NA	NA	NA	NA	NA	NA	NA	NA	NA	NA	NA	F	T
CTAAACACGTTTTTGTGGCAAGCAAGAATCC	60	TGGATTCTTGCTTGCCACAAAAACGTGTTTAGTTCTAGTTGAGAAGCAACGTAAATCAGCCAACAGACAAATCACTACAGAAGCTGTGTT	90	0.0269838036175711	21.63087	1	-4.43502	F	NA	NA	NA	NA	NA	NA	NA	NA	NA	NA	NA	NA	NA	NA	NA	NA	NA	NA	F	NA	NA	NA	NA	NA	NA	NA	NA	NA	NA	NA	NA	NA	NA	NA	NA	NA	NA	NA
ATCGTATTGCGGCAACCCGGCGCCGCCCGCA	25	AGTCCCGAGATCGTATTGCGGCAACCCGGCGCCGCCCGCATCCAGGAGGCGCGCG	55	0.0374602982868894	15.654783	1	-3.968532	F	NA	NA	NA	NA	NA	NA	NA	NA	NA	NA	NA	NA	NA	NA	NA	NA	NA	NA	F	NA	NA	NA	NA	NA	NA	NA	NA	NA	NA	NA	NA	NA	NA	NA	NA	NA	NA	NA
ATCCCGGGGCGGCTTTTTCGATGGGCTCGAC	11	CTGATCCGCAATCCCGGGGCGGCTTTTTCGATGGGCTCGAC	41	0.00788765148438256	38.211739	1	-5.255944	F	NA	NA	NA	NA	NA	NA	NA	NA	NA	NA	NA	NA	NA	NA	NA	NA	NA	NA	F	NA	NA	NA	NA	NA	NA	NA	NA	NA	NA	NA	NA	NA	NA	NA	NA	NA	NA	NA
GCCATAGACCAGATTGTCCCAGCCGACCGCC	7	ACCAAGGCGGTCGGCTGGGACAATCTGGTCTATGGCG	37	0.0268895836886006	83.434783	2.567667	-5.022119	F	NA	NA	NA	NA	NA	NA	NA	NA	NA	NA	NA	NA	NA	NA	NA	NA	NA	NA	F	NA	NA	NA	NA	NA	NA	NA	NA	NA	NA	NA	NA	NA	NA	NA	NA	NA	NA	NA
ATCAGTGAATGAAGCCTCCTATGATGGCAAT	11	ATCAGTGAATGAAGCCTCCTATGATGGCAATACAGCTCCTA	41	0.0283001321378382	1.186957	9.492	2.999444	T	6750	chrM	7063	7092	NA	11S30M	0	0	0	0	0	11	F	T	0.731707317073171	1	1	0	F	NA	ENSG00000198804	MT-CO1	+	protein_coding	NA	NA	NA	NA	NA	NA	NA	NA	NA	NA	NA	NA	T	F
AGTACGGCAACGACCTTAAGGAACTCGGCCC	5	TACCAGTACGGCAACGACCTTAAGGAACTCGGCCC	35	0.0448658164492363	12.923043	1.091	-3.566223	F	NA	NA	NA	NA	NA	NA	NA	NA	NA	NA	NA	NA	NA	NA	NA	NA	NA	NA	F	NA	NA	NA	NA	NA	NA	NA	NA	NA	NA	NA	NA	NA	NA	NA	NA	NA	NA	NA
CGCGATCTCTCCCCGCGTCGTGCTGGCGAAA	16	GAATTCTTGCGCGATCTCTCCCCGCGTCGTGCTGGCGAAAGCCAGG	46	0.0410213374998711	61.116087	1	-5.93348	F	NA	NA	NA	NA	NA	NA	NA	NA	NA	NA	NA	NA	NA	NA	NA	NA	NA	NA	F	NA	NA	NA	NA	NA	NA	NA	NA	NA	NA	NA	NA	NA	NA	NA	NA	NA	NA	NA
GGGCGTGACGGCCTCGTTTTTCTTGCGGAAA	8	CTCGCTTTCCGCAAGAAAAACGAGGCCGTCACGCCCGG	38	0.0426645381924198	1	8.680333	3.11775	F	NA	NA	NA	NA	NA	NA	NA	NA	NA	NA	NA	NA	NA	NA	NA	NA	NA	NA	F	NA	NA	NA	NA	NA	NA	NA	NA	NA	NA	NA	NA	NA	NA	NA	NA	NA	NA	NA
ATCAACTCGAGTGGAATGGAATGGAAAGGAC	5	TTCCAGTCCTTTCCATTCCATTCCACTCGAGTTGAT	36	0.0365717498214468	85.364348	1.227333	-6.120035	T	6676	chr4	49125604	49125639	NA	36M	0	0	0	2	0	0	F	F	1	0.944444444444444	10	2	F	NA	NA	NA	NA	NA	NA	NA	NA	NA	ENSG00000109182	+	CWH43	63524	ENSG00000249828	-	AC118282.3	77531	NA	NA
AGGAAGCGCTGGCGGTTCTCCAGGCTCTTGC	4	GCAAGAGCCTGGAGAACCGCCAGCGCTTCCTGCG	34	0.0380038391951793	1	4.986	2.317883	T	5370	chr14	33124974	33124990	NA	17M17S	0	0	0	1	17	0	T	F	0.5	0.941176470588235	1	1	F	NA	ENSG00000151322	NPAS3	+	protein_coding	NA	NA	NA	NA	NA	NA	NA	NA	NA	NA	NA	NA	F	T
AGAATCAATCCGAATGTAATGGAATGTAATG	5	AGAATCAATCCGAATGTAATGGAATGTAATGGAACG	36	0.0457672112535275	69.575652	2.469333	-4.816389	T	3911	chr21	10654018	10654043	NA	26M10S	0	0	0	1	10	0	T	F	0.722222222222222	0.961538461538462	3	1	F	NA	NA	NA	NA	NA	NA	NA	NA	NA	ENSG00000277282	-	IGHV1OR21-1	4184	ENSG00000229306	-	AP001464.1	2345632	NA	NA
ATATTGATGTTCATCCCTGGGTTTACGTCTC	9	CTATCCGAGACGTAAACCCAGGGATGAACATCAATATCG	39	0.0334668456341655	145.374348	1	-7.183629	F	NA	NA	NA	NA	NA	NA	NA	NA	NA	NA	NA	NA	NA	NA	NA	NA	NA	NA	F	NA	NA	NA	NA	NA	NA	NA	NA	NA	NA	NA	NA	NA	NA	NA	NA	NA	NA	NA
GCACGCCCCATGGTTCGTCGACCGGTCCGTA	5	GCCGCACGCCCCATGGTTCGTCGACCGGTCCGTAT	35	0.034095856241449	20.035652	1	-4.324498	F	NA	NA	NA	NA	NA	NA	NA	NA	NA	NA	NA	NA	NA	NA	NA	NA	NA	NA	F	NA	NA	NA	NA	NA	NA	NA	NA	NA	NA	NA	NA	NA	NA	NA	NA	NA	NA	NA
CCGGGCAGCAGGTCGTGATAGAGCTCCTTCG	18	ACCGAAGGAGCTCTATCACGACCTGCTGCCCGGCGAGGCCTTCGTGCC	48	0.0215274108825921	11.186957	1.069333	-3.387035	F	NA	NA	NA	NA	NA	NA	NA	NA	NA	NA	NA	NA	NA	NA	NA	NA	NA	NA	F	NA	NA	NA	NA	NA	NA	NA	NA	NA	NA	NA	NA	NA	NA	NA	NA	NA	NA	NA
TCGTCAATGGTCGGCAGCCGCTTCTCGGCAA	28	TCACCGAGCACCAGTTTGCCGAGAAGCGGCTGCCGACCATTGACGAGCTCAACGCGGC	58	0.00690094108535708	17.336522	2.051	-3.079415	F	NA	NA	NA	NA	NA	NA	NA	NA	NA	NA	NA	NA	NA	NA	NA	NA	NA	NA	F	NA	NA	NA	NA	NA	NA	NA	NA	NA	NA	NA	NA	NA	NA	NA	NA	NA	NA	NA
CTCCTTCATCGTTTCGCTGGTATCAGTCGAA	63	GTCCTTGAGCGCGCCGGCCACCTCCCGAACCTTTTCGACTGATACCAGCGAAACGATGAAGGAGTCGCCTCGATGGAGTTGTCGCGGCCCGAG	93	0.00764471141206931	47.601739	3.159	-3.913474	F	NA	NA	NA	NA	NA	NA	NA	NA	NA	NA	NA	NA	NA	NA	NA	NA	NA	NA	F	NA	NA	NA	NA	NA	NA	NA	NA	NA	NA	NA	NA	NA	NA	NA	NA	NA	NA	NA
GATCGTCGAGAACGGATTCATGTACGTCACC	17	GATTGGAAGGAACGCCGATCGTCGAGAACGGATTCATGTACGTCACC	47	0.0382352708945916	25.438261	2.667333	-3.25353	F	NA	NA	NA	NA	NA	NA	NA	NA	NA	NA	NA	NA	NA	NA	NA	NA	NA	NA	F	NA	NA	NA	NA	NA	NA	NA	NA	NA	NA	NA	NA	NA	NA	NA	NA	NA	NA	NA
CCGCAGCGAATGTTCGACTCGTCGCGGCGCG	3	CCGCAGCGAATGTTCGACTCGTCGCGGCGCGCG	33	0.0331823308588993	57.692609	1	-5.850315	F	NA	NA	NA	NA	NA	NA	NA	NA	NA	NA	NA	NA	NA	NA	NA	NA	NA	NA	F	NA	NA	NA	NA	NA	NA	NA	NA	NA	NA	NA	NA	NA	NA	NA	NA	NA	NA	NA
AACGCCGTCGGCGGGGCGTTCGGCACCTTCC	3	AACGCCGTCGGCGGGGCGTTCGGCACCTTCCGC	33	0.0244087119120234	8.34087	1.211	-2.783999	F	NA	NA	NA	NA	NA	NA	NA	NA	NA	NA	NA	NA	NA	NA	NA	NA	NA	NA	F	NA	NA	NA	NA	NA	NA	NA	NA	NA	NA	NA	NA	NA	NA	NA	NA	NA	NA	NA
ACGCTCGCGGCGTCGCCACTGTGATCCTCAA	9	ACGTGGACGCTCGCGGCGTCGCCACTGTGATCCTCAACC	39	0.0332293872957472	24.954783	2.539	-3.296984	F	NA	NA	NA	NA	NA	NA	NA	NA	NA	NA	NA	NA	NA	NA	NA	NA	NA	NA	F	NA	NA	NA	NA	NA	NA	NA	NA	NA	NA	NA	NA	NA	NA	NA	NA	NA	NA	NA
CGTCACGCGCTTCATCGAGGCCGATGCCGAG	32	CGCAAGGAATCCTACGAGGTCGGCAACGAATTCGTCACGCGCTTCATCGAGGCCGATGCCGAGAACGGCATGTTCT	76	0.00573658027233477	1	11.708	3.549423	F	NA	NA	NA	NA	NA	NA	NA	NA	NA	NA	NA	NA	NA	NA	NA	NA	NA	NA	F	NA	NA	NA	NA	NA	NA	NA	NA	NA	NA	NA	NA	NA	NA	NA	NA	NA	NA	NA
ATAGTCATCAGCCCCTGCATTGAGACCTTCC	6	AAGGTGGAAGGTCTCAATGCAGGGGCTGATGACTAT	36	0.00788765148438256	1	14.029667	3.810409	T	6494	chr18	48581173	48581193	NA	15S21M	0	0	0	2	0	15	F	T	0.583333333333333	0.904761904761905	2	2	F	NA	ENSG00000134030	CTIF	+	protein_coding	NA	NA	NA	NA	NA	NA	NA	NA	NA	NA	NA	NA	F	T
GACGCAAGCGGCGACGGACGCGGCACAAGTC	12	GACGCAAGCGGCGACGGACGCGGCACAAGTCGCGGCCCAGCA	42	0.044579678771716	1	6.445	2.68818	F	NA	NA	NA	NA	NA	NA	NA	NA	NA	NA	NA	NA	NA	NA	NA	NA	NA	NA	F	NA	NA	NA	NA	NA	NA	NA	NA	NA	NA	NA	NA	NA	NA	NA	NA	NA	NA	NA
CCAGCAGATGCTTGCCGATACGCTTGATGCC	2	CCAGCAGATGCTTGCCGATACGCTTGATGCCC	32	0.0463800682976984	1.057391	8.65	3.032191	T	10168	chr9	127946826	127946843	NA	14S18M	0	0	0	0	0	14	F	T	0.5625	1	1	0	F	NA	ENSG00000167106	FAM102A	-	protein_coding	NA	NA	NA	NA	NA	NA	NA	NA	NA	NA	NA	NA	F	T
CGGTCGCCCTCTCAGGCCGGCTACCCGTCGA	2	CGGTCGCCCTCTCAGGCCGGCTACCCGTCGAA	32	0.0225355548300255	7.03	20.752	1.561654	F	NA	NA	NA	NA	NA	NA	NA	NA	NA	NA	NA	NA	NA	NA	NA	NA	NA	NA	F	NA	NA	NA	NA	NA	NA	NA	NA	NA	NA	NA	NA	NA	NA	NA	NA	NA	NA	NA
AGTATGCTTTATCGGACTCGTCATCACCCCG	8	AACAGTATGCTTTATCGGACTCGTCATCACCCCGAGTCCA	40	0.0310963802243457	102.932174	1.431	-6.168527	F	NA	NA	NA	NA	NA	NA	NA	NA	NA	NA	NA	NA	NA	NA	NA	NA	NA	NA	F	NA	NA	NA	NA	NA	NA	NA	NA	NA	NA	NA	NA	NA	NA	NA	NA	NA	NA	NA
ATCATCGTCGCCAAGCACCGCAACGGGCCGA	36	GTCGGCCCGTTGCGGTGCTTGGCGACGATGATATCGGCCTCGCCGGCGCGCGGGGACTCTTTGTCG	66	0.0319987398147631	98.296957	1	-6.619075	F	NA	NA	NA	NA	NA	NA	NA	NA	NA	NA	NA	NA	NA	NA	NA	NA	NA	NA	F	NA	NA	NA	NA	NA	NA	NA	NA	NA	NA	NA	NA	NA	NA	NA	NA	NA	NA	NA
CCGGATACGCCGACGTGACTTGCGGTTGTCG	3	TACGACAACCGCAAGTCACGTCGGCGTATCCGG	33	0.045678757010558	1	8.428667	3.075304	F	NA	NA	NA	NA	NA	NA	NA	NA	NA	NA	NA	NA	NA	NA	NA	NA	NA	NA	F	NA	NA	NA	NA	NA	NA	NA	NA	NA	NA	NA	NA	NA	NA	NA	NA	NA	NA	NA
ATGCCACGAAGGATGCCGGTGGGAAGAACCC	12	GCGGGTTCTTCCCACCGGCATCCTTCGTGGCATCTTTCGCAGT	43	0.0277324680563242	8.376522	1.310667	-2.67605	F	NA	NA	NA	NA	NA	NA	NA	NA	NA	NA	NA	NA	NA	NA	NA	NA	NA	NA	F	NA	NA	NA	NA	NA	NA	NA	NA	NA	NA	NA	NA	NA	NA	NA	NA	NA	NA	NA
AAATCTCTCCCTCACTAAACGTAAGCCTTCC	1	AAATCTCTCCCTCACTAAACGTAAGCCTTCC	31	0.0160690765383585	2.16	18.153	3.071105	T	402	chrM	4900	4930	NA	31M	0	0	0	1	0	0	F	F	1	0.967741935483871	1	1	F	NA	ENSG00000198763	MT-ND2	+	protein_coding	NA	NA	NA	NA	NA	NA	NA	NA	NA	NA	NA	NA	T	F
CAGCACCACGCCCATGCAGCCCTGAAATTGG	12	GCAGCACCACGCCCATGCAGCCCTGAAATTGGATGTGGCTCT	42	0.0333385436023285	71.65087	1	-6.162912	F	NA	NA	NA	NA	NA	NA	NA	NA	NA	NA	NA	NA	NA	NA	NA	NA	NA	NA	F	NA	NA	NA	NA	NA	NA	NA	NA	NA	NA	NA	NA	NA	NA	NA	NA	NA	NA	NA
CGCCTCTCAGCTCTCGCTCCAGTGACTCGAG	5	TCGCCTCTCAGCTCTCGCTCCAGTGACTCGAGATC	35	0.0325379605183706	80.48087	3.286	-4.614242	F	NA	NA	NA	NA	NA	NA	NA	NA	NA	NA	NA	NA	NA	NA	NA	NA	NA	NA	F	NA	NA	NA	NA	NA	NA	NA	NA	NA	NA	NA	NA	NA	NA	NA	NA	NA	NA	NA
GCATGGTCTGTACATCTCCTGCTCCAGCGCC	4	TGAGGCGCTGGAGCAGGAGATGTACAGACCATGC	34	0.0395354427063366	28.519565	1.276667	-4.481498	F	NA	NA	NA	NA	NA	NA	NA	NA	NA	NA	NA	NA	NA	NA	NA	NA	NA	NA	F	NA	NA	NA	NA	NA	NA	NA	NA	NA	NA	NA	NA	NA	NA	NA	NA	NA	NA	NA
AAGGGGCGGGGAGGGGAAAAGGGGAGGGTAG	1	AAGGGGCGGGGAGGGGAAAAGGGGAGGGTAG	31	0.0492484542439571	94.306957	1	-6.559292	T	1188	chr6	80327876	80327899	NA	24M7S	0	0	0	2	7	0	T	F	0.774193548387097	0.916666666666667	1	2	F	NA	ENSG00000083123	BCKDHB	+	protein_coding	NA	NA	NA	NA	NA	NA	NA	NA	NA	NA	NA	NA	F	T
AGAAACCGCATGTCTGCAACACGACATCTGG	34	AACGGCAAGTGCCGCCAGATGTCGTGTTGCAGACATGCGGTTTCTCTCCCTGATAGCAGATGAT	64	0.0178849841577756	1	8.303	3.053633	F	NA	NA	NA	NA	NA	NA	NA	NA	NA	NA	NA	NA	NA	NA	NA	NA	NA	NA	F	NA	NA	NA	NA	NA	NA	NA	NA	NA	NA	NA	NA	NA	NA	NA	NA	NA	NA	NA
AACCCACTGCAGCAATGCAGTATCCCTAGCT	1	AACCCACTGCAGCAATGCAGTATCCCTAGCT	31	0.0277684877041218	1.158696	12.142	3.389432	F	NA	NA	NA	NA	NA	NA	NA	NA	NA	NA	NA	NA	NA	NA	NA	NA	NA	NA	F	NA	NA	NA	NA	NA	NA	NA	NA	NA	NA	NA	NA	NA	NA	NA	NA	NA	NA	NA
CTACGGAGATCCTTTAGGGGTTCCAAGCTGC	1	CTACGGAGATCCTTTAGGGGTTCCAAGCTGC	31	0.0388338062908339	96.746522	1.083	-6.481105	T	15424	KI270519.1	84258	84273	NA	16M15S	0	0	0	0	15	0	T	F	0.516129032258065	1	1	0	F	NA	NA	NA	NA	NA	NA	NA	NA	NA	NA	NA	NA	NA	NA	NA	NA	NA	NA	NA
TCTGACTGGCTCGGCACCTTACGAGAAATCA	4	TTGATTTCTCGTAAGGTGCCGAGCCAGTCAGAAA	34	0.0327638568111807	57.887391	1	-5.855177	T	20578	chr3	4218186	4218202	NA	17S17M	0	0	0	0	0	17	F	T	0.5	1	1	0	F	NA	ENSG00000144455	SUMF1	-	protein_coding	NA	NA	NA	NA	NA	NA	NA	NA	NA	NA	NA	NA	F	T
ACGATCATGGACCGTCCACCGGTCTCCAGCG	27	AAGTGGTTGACCCCTGCTCCCATAACGATCATGGACCGTCCACCGGTCTCCAGCGAG	57	0.0370764721292937	73.26	1.081333	-6.082143	F	NA	NA	NA	NA	NA	NA	NA	NA	NA	NA	NA	NA	NA	NA	NA	NA	NA	NA	F	NA	NA	NA	NA	NA	NA	NA	NA	NA	NA	NA	NA	NA	NA	NA	NA	NA	NA	NA
ATGCTCGGCGATCCGGCCCTGCCGTCCGGTC	12	CCCGGACCGGACGGCAGGGCCGGATCGCCGAGCATTTGACCCG	43	0.0329377252414245	1.038261	7.505333	2.853747	F	NA	NA	NA	NA	NA	NA	NA	NA	NA	NA	NA	NA	NA	NA	NA	NA	NA	NA	F	NA	NA	NA	NA	NA	NA	NA	NA	NA	NA	NA	NA	NA	NA	NA	NA	NA	NA	NA
AAGCGTATCACGGCACCAGCTTGTAGCCACC	14	ACGGAAGCCGGTGGCTACAAGCTGGTGCCGTGATACGCTTCGCG	44	0.00939060452599388	9.635652	1.243	-2.954556	F	NA	NA	NA	NA	NA	NA	NA	NA	NA	NA	NA	NA	NA	NA	NA	NA	NA	NA	F	NA	NA	NA	NA	NA	NA	NA	NA	NA	NA	NA	NA	NA	NA	NA	NA	NA	NA	NA
CGCCGGCCCGCGTCGCCCAGCATCTGCGGTA	45	CCCGCCGGCCCGCGTCGCCCAGCATCTGCGGTATCTCGGACCCAAGATCCTGTCGCTCTATCCGTCGAGCCTCGA	75	0.0213839785343965	8.988261	1	-3.168042	F	NA	NA	NA	NA	NA	NA	NA	NA	NA	NA	NA	NA	NA	NA	NA	NA	NA	NA	F	NA	NA	NA	NA	NA	NA	NA	NA	NA	NA	NA	NA	NA	NA	NA	NA	NA	NA	NA
CTGCGCAACGGTTCGGAGGAACAAATCAATA	31	CTGAACAATATTCTGCGCAACGGTTCGGAGGAACAAATCAATAAGTATGTGCCCGGCCTGTGCAAGG	67	0.00628985007746395	1	9.439	3.238634	F	NA	NA	NA	NA	NA	NA	NA	NA	NA	NA	NA	NA	NA	NA	NA	NA	NA	NA	F	NA	NA	NA	NA	NA	NA	NA	NA	NA	NA	NA	NA	NA	NA	NA	NA	NA	NA	NA
ATCCGAACTGAGACCGGCTTTAAGGGATTCG	18	CAGACTCCAATCCGAACTGAGACCGGCTTTAAGGGATTCGCTCCACCTCGCGG	53	0.0146397925170068	93.36	4.589667	-4.346343	F	NA	NA	NA	NA	NA	NA	NA	NA	NA	NA	NA	NA	NA	NA	NA	NA	NA	NA	F	NA	NA	NA	NA	NA	NA	NA	NA	NA	NA	NA	NA	NA	NA	NA	NA	NA	NA	NA
AACGACCCGGTTCTCGACCGCGTTCGGCCGC	10	GAAACGACCCGGTTCTCGACCGCGTTCGGCCGCGGCCTCG	40	0.047999652493561	11.855652	2.228667	-2.411322	F	NA	NA	NA	NA	NA	NA	NA	NA	NA	NA	NA	NA	NA	NA	NA	NA	NA	NA	F	NA	NA	NA	NA	NA	NA	NA	NA	NA	NA	NA	NA	NA	NA	NA	NA	NA	NA	NA
ATTCAATATGAAAATCACCTCGGAGCTGGTG	3	CACCAGCTCCGAGGTGATTTTCATATTGAATTACAAATTCGAA	43	0.0219455813267233	1.136522	7.824	2.783281	T	8181	chrM	5788	5830	NA	43M	0	0	0	2	0	0	F	F	1	0.953488372093023	1	2	F	NA	ENSG00000210140	MT-TC	-	Mt_tRNA	NA	NA	NA	NA	NA	NA	NA	NA	NA	NA	NA	NA	T	T
ATGCCTCACCAGGCTCGTGAGCCACGAGGAA	88	CGGTTTCCTCGTGGCTCACGAGCCTGGTGAGGCATTCTTTGCCGATCTTGGCAAGGTGGAAAGGGTGACCGTCGGGAAGGACCTCGAAGGAGCACGGCTATTCGGGGAAGCGCAGACG	118	0.0226946314134791	133.493913	1	-7.06063	F	NA	NA	NA	NA	NA	NA	NA	NA	NA	NA	NA	NA	NA	NA	NA	NA	NA	NA	F	NA	NA	NA	NA	NA	NA	NA	NA	NA	NA	NA	NA	NA	NA	NA	NA	NA	NA	NA
CCGAAGCCGCTCCCAAGGCTGCTCGATCCGC	7	CGAACTCCGAAGCCGCTCCCAAGGCTGCTCGATCCGC	37	0.0305188189687035	1	8.230333	3.040951	F	NA	NA	NA	NA	NA	NA	NA	NA	NA	NA	NA	NA	NA	NA	NA	NA	NA	NA	F	NA	NA	NA	NA	NA	NA	NA	NA	NA	NA	NA	NA	NA	NA	NA	NA	NA	NA	NA
ATAGACCTCGTTGAAGTCCGACGCCCCGCTC	4	AAATAGACCTCGTTGAAGTCCGACGCCCCGCTCG	34	0.0491706862745098	49.306957	4.150333	-3.570492	F	NA	NA	NA	NA	NA	NA	NA	NA	NA	NA	NA	NA	NA	NA	NA	NA	NA	NA	F	NA	NA	NA	NA	NA	NA	NA	NA	NA	NA	NA	NA	NA	NA	NA	NA	NA	NA	NA
GTATTTTGTACGGATTCATGTAGCTTTCCAA	16	GCTATTGGAAAGCTACATGAATCCGTACAAAATACAAATGTGACAA	46	0.0362218233919417	1	9.541333	3.254191	F	NA	NA	NA	NA	NA	NA	NA	NA	NA	NA	NA	NA	NA	NA	NA	NA	NA	NA	F	NA	NA	NA	NA	NA	NA	NA	NA	NA	NA	NA	NA	NA	NA	NA	NA	NA	NA	NA
CGTCAGTGACGGTTCACGATCGACGAGCGCC	15	CGGCGCTCGTCGATCGTGAACCGTCACTGACGAGGACGCGGCCGG	45	0.0362876086731115	21.138696	2.629667	-3.006934	F	NA	NA	NA	NA	NA	NA	NA	NA	NA	NA	NA	NA	NA	NA	NA	NA	NA	NA	F	NA	NA	NA	NA	NA	NA	NA	NA	NA	NA	NA	NA	NA	NA	NA	NA	NA	NA	NA
CCTATGGATATGATATTTCCAATACCGCGGC	36	TTCATTGCGGTGACGGCGGCAGCTCTGGGAATCACCTATGGATATGATATTTCCAATACCGCGGCT	66	0.0431613494462187	35.005217	1	-5.129498	F	NA	NA	NA	NA	NA	NA	NA	NA	NA	NA	NA	NA	NA	NA	NA	NA	NA	NA	F	NA	NA	NA	NA	NA	NA	NA	NA	NA	NA	NA	NA	NA	NA	NA	NA	NA	NA	NA
CATACCGAAACGATGCTGGTGACCCTGCACG	36	GTGGAACTGTTGGGACCGAAGGGCTACCATACCGAAACGATGCTGGTGACCCTGCACGGATTGGCC	66	0	39.056087	1	-5.287476	F	NA	NA	NA	NA	NA	NA	NA	NA	NA	NA	NA	NA	NA	NA	NA	NA	NA	NA	F	NA	NA	NA	NA	NA	NA	NA	NA	NA	NA	NA	NA	NA	NA	NA	NA	NA	NA	NA
CAATGCCGCGCTTGTTGCGGTTCAGGCTCAG	10	CAATGCCGCGCTTGTTGCGGTTCAGGCTCAGATAGGCCGC	40	0.0428292752502735	24.010435	2.627667	-3.191807	F	NA	NA	NA	NA	NA	NA	NA	NA	NA	NA	NA	NA	NA	NA	NA	NA	NA	NA	F	NA	NA	NA	NA	NA	NA	NA	NA	NA	NA	NA	NA	NA	NA	NA	NA	NA	NA	NA
CGACAGTCTCCGTGTCGTCACCGGCAACGCG	41	TGATGGCGTCTGGCTCAACGAGCCGGAGCGCTGGACTGTGGATGGCGACAGTCTCCGTGTCGTCACCGGCAACGCGACCGATTT	84	0.010111341286268	20.743043	1	-4.374556	F	NA	NA	NA	NA	NA	NA	NA	NA	NA	NA	NA	NA	NA	NA	NA	NA	NA	NA	F	NA	NA	NA	NA	NA	NA	NA	NA	NA	NA	NA	NA	NA	NA	NA	NA	NA	NA	NA
AGATCGAGATCCTCGTCGGTGACGATCAGCG	135	GGCGACCTCAAGATCACGACGCCGCCGGCGCTCGGCATCAACTGGCTGATCCCGCGGCTCGACGAGTTCACGGCGCTCTATCCCGACATCCGGATCTCGCTGATCGTCACCGACGAGGATCTCGATCTGTCGATGCGCGAGGCCGATGTCGCGATCCGCACCCGCAAGCCGACCCAACCGGACCTGATCCAGCGC	195	0.00507802902933172	12.040435	1.048667	-3.521259	F	NA	NA	NA	NA	NA	NA	NA	NA	NA	NA	NA	NA	NA	NA	NA	NA	NA	NA	F	NA	NA	NA	NA	NA	NA	NA	NA	NA	NA	NA	NA	NA	NA	NA	NA	NA	NA	NA
AAGGAGTACTGATGACAAAAACACTTCCATA	19	GAAGAGGCAGTCTCATAAAACCGAGAAAGGAGTACTGATGACAAAAACACTTCCATA	57	0.0205358533994896	69.821739	1	-6.125604	F	NA	NA	NA	NA	NA	NA	NA	NA	NA	NA	NA	NA	NA	NA	NA	NA	NA	NA	F	NA	NA	NA	NA	NA	NA	NA	NA	NA	NA	NA	NA	NA	NA	NA	NA	NA	NA	NA
AGATTTCCCGGCAAGAACTCGAACGCCTGCG	45	GAGCGTCGTCCCCGAAACCGTGCTGATGACGAGATTTCCCGGCAAGAACTCGAACGCCTGCGACGGCGAATTGCCGAGCATGAGCGCCGAAG	92	0.0195418635070771	66.14	5.081667	-3.702149	F	NA	NA	NA	NA	NA	NA	NA	NA	NA	NA	NA	NA	NA	NA	NA	NA	NA	NA	F	NA	NA	NA	NA	NA	NA	NA	NA	NA	NA	NA	NA	NA	NA	NA	NA	NA	NA	NA
CAGATCACCGGCACCGCATAGGCGAACAGGC	41	CCGCGTGGAGAGCCAGATCACCGGCACCGCATAGGCGAACAGGCGCAGGAACGAACTCAGCAGCACCGGCC	71	0.0289310038560411	28.688696	1	-4.84241	F	NA	NA	NA	NA	NA	NA	NA	NA	NA	NA	NA	NA	NA	NA	NA	NA	NA	NA	F	NA	NA	NA	NA	NA	NA	NA	NA	NA	NA	NA	NA	NA	NA	NA	NA	NA	NA	NA
GTTCTCAATTCCGCGGTAGTCGGGCGATCAA	4	GATTGATCGCCCGACTACCGCGGAATTGAGAACCGCCG	38	0.0269838036175711	26.934783	6.414	-2.070174	F	NA	NA	NA	NA	NA	NA	NA	NA	NA	NA	NA	NA	NA	NA	NA	NA	NA	NA	F	NA	NA	NA	NA	NA	NA	NA	NA	NA	NA	NA	NA	NA	NA	NA	NA	NA	NA	NA
AACGGCCAGCAGCAGACCGTTAAGACCTGGG	45	TGCTTATGGTAGCGTTGGCTTCGGTACGGCACCTGACACGGTGTTCGGTCTGAACGGCCAGCAGCAGACCGTTAAGACCTGGGG	84	0.0218610881226054	1	9.903333	3.307914	F	NA	NA	NA	NA	NA	NA	NA	NA	NA	NA	NA	NA	NA	NA	NA	NA	NA	NA	F	NA	NA	NA	NA	NA	NA	NA	NA	NA	NA	NA	NA	NA	NA	NA	NA	NA	NA	NA
GCGGGCCGGATGCTCCGAAGCCCGGCAGCAA	10	GCCGCGGGCCGGATGCTCCGAAGCCCGGCAGCAATCTCGA	40	0.0368149240734462	1	5.767667	2.527988	F	NA	NA	NA	NA	NA	NA	NA	NA	NA	NA	NA	NA	NA	NA	NA	NA	NA	NA	F	NA	NA	NA	NA	NA	NA	NA	NA	NA	NA	NA	NA	NA	NA	NA	NA	NA	NA	NA
GGCATCGCGCAGACGATCGAGGCCATCGCCA	21	AACGGCATCGCGCAGACGATCGAGGCCATCGCCAGCGAGAGCTGGTCGAGG	51	0.0105219561403509	47.079565	2.165667	-4.442218	F	NA	NA	NA	NA	NA	NA	NA	NA	NA	NA	NA	NA	NA	NA	NA	NA	NA	NA	F	NA	NA	NA	NA	NA	NA	NA	NA	NA	NA	NA	NA	NA	NA	NA	NA	NA	NA	NA
CGGAGCATTATCGGTGTTTTCGGTCATGGCA	38	TCTGCGCAGCCGCTAAGTCCTCACACTGCTGCCATGACCGAAAACACCGATAATGCTCCGTTCGACCCCGCGC	73	0.00628985007746395	16.827826	1	-4.072777	F	NA	NA	NA	NA	NA	NA	NA	NA	NA	NA	NA	NA	NA	NA	NA	NA	NA	NA	F	NA	NA	NA	NA	NA	NA	NA	NA	NA	NA	NA	NA	NA	NA	NA	NA	NA	NA	NA
ACAGGCTTCCACGGACTTCACGTCATTATCG	31	CACAGGCTTCCACGGACTTCACGTCATTATCGGCTCAACTTTCCTCACTATCTGCTTCATC	61	0.00340365003546938	1.116087	5.291667	2.245273	T	2096	chrM	9806	9866	NA	61M	0	0	0	1	0	0	F	F	1	0.983606557377049	1	1	F	NA	ENSG00000198938	MT-CO3	+	protein_coding	NA	NA	NA	NA	NA	NA	NA	NA	NA	NA	NA	NA	T	F
ACCTGGCCGTCGTAATGGGTGTGGACGTCGA	5	GTCACCTGGCCGTCGTAATGGGTGTGGACGTCGAC	35	0.0307140731055382	20.405652	1.469	-3.796063	F	NA	NA	NA	NA	NA	NA	NA	NA	NA	NA	NA	NA	NA	NA	NA	NA	NA	NA	F	NA	NA	NA	NA	NA	NA	NA	NA	NA	NA	NA	NA	NA	NA	NA	NA	NA	NA	NA
CGGGCCGCAGCCCAAGGTCTGCTGTTCGGCC	18	CAAAGCCGGGCCGCAGCCCAAGGTCTGCTGTTCGGCCACCACGAGCCG	48	0.0489385788697943	1	4.331	2.1147	F	NA	NA	NA	NA	NA	NA	NA	NA	NA	NA	NA	NA	NA	NA	NA	NA	NA	NA	F	NA	NA	NA	NA	NA	NA	NA	NA	NA	NA	NA	NA	NA	NA	NA	NA	NA	NA	NA
CCAGGATGAAGCCCTGGAACGAACGTTCCGG	10	GGAGAGCCAGGATGAAGCCCTGGAACGAACGTTCCGGGCGCATGTGGTCAGGCAG	55	0.0191478099563078	14.728696	1.825333	-3.012398	F	NA	NA	NA	NA	NA	NA	NA	NA	NA	NA	NA	NA	NA	NA	NA	NA	NA	NA	F	NA	NA	NA	NA	NA	NA	NA	NA	NA	NA	NA	NA	NA	NA	NA	NA	NA	NA	NA
CGGGCGCCGCGCTTCCTGCCCGCAGCACCAG	7	CGGGATCGGGCGCCGCGCTTCCTGCCCGCAGCACCAG	37	0.0460215384825817	8.968261	1	-3.164828	F	NA	NA	NA	NA	NA	NA	NA	NA	NA	NA	NA	NA	NA	NA	NA	NA	NA	NA	F	NA	NA	NA	NA	NA	NA	NA	NA	NA	NA	NA	NA	NA	NA	NA	NA	NA	NA	NA
CAGCACGCCTTCCGCATCATGAAGGACCAGA	1	CAGCACGCCTTCCGCATCATGAAGGACCAGA	31	0.0274680942405083	58.221304	1.028	-5.823635	T	9130	chr10	17142416	17142432	NA	17M14S	0	0	0	2	14	0	T	F	0.548387096774194	0.882352941176471	1	2	F	NA	ENSG00000107614	TRDMT1	-	protein_coding	NA	NA	NA	NA	NA	NA	NA	NA	NA	NA	NA	NA	T	F
AATGAACAAGCCGTGCAGTGAGACCCCCAAG	10	GCAGTGCCAATGAACAAGCCGTGCAGTGAGACCCCCAAGAGGC	43	0.0329377252414245	4.862609	20.883333	2.102549	T	1423	chr16	2771989	2772018	NA	13S30M	0	0	0	0	0	13	F	T	0.697674418604651	1	1	0	F	NA	ENSG00000103363	ELOB	-	protein_coding	NA	NA	NA	NA	NA	NA	NA	NA	NA	NA	NA	NA	T	F
TAGCGGGGTGACGACGACGAAGATCCCGTCA	4	CTGACGGGATCTTCGTCGTCGTCACCCCGCTACC	34	0.0492954094587249	76.364783	7.652	-3.318999	F	NA	NA	NA	NA	NA	NA	NA	NA	NA	NA	NA	NA	NA	NA	NA	NA	NA	NA	F	NA	NA	NA	NA	NA	NA	NA	NA	NA	NA	NA	NA	NA	NA	NA	NA	NA	NA	NA
ATCTGCATCAATCTTGACTATTTCATGCAGG	108	GCCTACATGCGCCTGCATGAAATAGTCAAGATTGATGCAGATGCATTCAGTGCGGTACACTGGGTTCCGGGACCTTATGGGCTAGACGATGAAACGCAAGCTATCGAGCGAGGCGACGGCCGCCTGGATCCGCCTGATGCGGGTGCCGA	149	0.00169152547153182	32.781304	2.719333	-3.591549	F	NA	NA	NA	NA	NA	NA	NA	NA	NA	NA	NA	NA	NA	NA	NA	NA	NA	NA	F	NA	NA	NA	NA	NA	NA	NA	NA	NA	NA	NA	NA	NA	NA	NA	NA	NA	NA	NA
CCGGAATCGAACTGACGAGTCCGGGAGGCCA	9	CCGGAATCGAACTGACGAGTCCGGGAGGCCAGCCTATGA	39	0.040643705616311	33.185652	1.526667	-4.442102	F	NA	NA	NA	NA	NA	NA	NA	NA	NA	NA	NA	NA	NA	NA	NA	NA	NA	NA	F	NA	NA	NA	NA	NA	NA	NA	NA	NA	NA	NA	NA	NA	NA	NA	NA	NA	NA	NA
ACCGGCACGAACTGGCCGGGATCGCTGTTGG	6	CGAGACCAACAGCGATCCCGGCCAGTTCGTGCCGGT	36	0.0424411503746878	21.36087	3.553667	-2.58759	F	NA	NA	NA	NA	NA	NA	NA	NA	NA	NA	NA	NA	NA	NA	NA	NA	NA	NA	F	NA	NA	NA	NA	NA	NA	NA	NA	NA	NA	NA	NA	NA	NA	NA	NA	NA	NA	NA
CGCGTTCGCGATGGCCGCGCCCGAGCGGATC	8	TCGATCCGCTCGGGCGCGGCCATCGCGAACGCGCCGGC	38	0.0394461805124539	22.56087	2.053333	-3.457783	F	NA	NA	NA	NA	NA	NA	NA	NA	NA	NA	NA	NA	NA	NA	NA	NA	NA	NA	F	NA	NA	NA	NA	NA	NA	NA	NA	NA	NA	NA	NA	NA	NA	NA	NA	NA	NA	NA
ACGCAACGAGGACGGCTCCTACTCGCGGTTC	9	GCAGAACCGCGAGTAGGAGCCGTCCTCGTTGCGTCCGAT	39	0.0333385436023285	40.576957	1	-5.342589	F	NA	NA	NA	NA	NA	NA	NA	NA	NA	NA	NA	NA	NA	NA	NA	NA	NA	NA	F	NA	NA	NA	NA	NA	NA	NA	NA	NA	NA	NA	NA	NA	NA	NA	NA	NA	NA	NA
CAACCCCTTGTGCCGCGCCAGTTACAACAAA	15	GCAACACGCCGTCCAACCCCTTGTGCCGCGCCAGTTACAACAAAAC	46	0.0336223184108771	16.117826	3.497333	-2.20433	F	NA	NA	NA	NA	NA	NA	NA	NA	NA	NA	NA	NA	NA	NA	NA	NA	NA	NA	F	NA	NA	NA	NA	NA	NA	NA	NA	NA	NA	NA	NA	NA	NA	NA	NA	NA	NA	NA
GCGGTGACGCTGTTTCTGCCCTGGACCAGCA	4	TGGCGGTGACGCTGTTTCTGCCCTGGACCAGCAC	34	0.0319075544231586	10.642609	1.577667	-2.753987	T	18337	KI270821.1	6665	6681	NA	17M17S	0	0	0	2	17	0	T	F	0.5	0.882352941176471	1	2	F	NA	NA	NA	NA	NA	NA	NA	NA	NA	NA	NA	NA	NA	NA	NA	NA	NA	NA	NA
GCGGTGTTCGCGTTCACCTGGTTGTCGTTCA	3	TGAACGACAACCAGGTGAACGCGAACACCGCGC	33	0.0362644699532953	1	4.538667	2.182269	F	NA	NA	NA	NA	NA	NA	NA	NA	NA	NA	NA	NA	NA	NA	NA	NA	NA	NA	F	NA	NA	NA	NA	NA	NA	NA	NA	NA	NA	NA	NA	NA	NA	NA	NA	NA	NA	NA
CTTGTCGTTCGGGTTGAACATCGAATAGAGC	10	GACTGGCTCTATTCGATGTTCAACCCGAACGACAAGACCA	40	0.0260337059142702	28.855217	1.107667	-4.703236	F	NA	NA	NA	NA	NA	NA	NA	NA	NA	NA	NA	NA	NA	NA	NA	NA	NA	NA	F	NA	NA	NA	NA	NA	NA	NA	NA	NA	NA	NA	NA	NA	NA	NA	NA	NA	NA	NA
AGCTTCATGCCGTCGCGCACCTCTTCGAGCG	1	AGCTTCATGCCGTCGCGCACCTCTTCGAGCG	31	0.0392565092752772	1	10.363	3.37337	F	NA	NA	NA	NA	NA	NA	NA	NA	NA	NA	NA	NA	NA	NA	NA	NA	NA	NA	F	NA	NA	NA	NA	NA	NA	NA	NA	NA	NA	NA	NA	NA	NA	NA	NA	NA	NA	NA
CCCTCACGGGGCCGTCGCGGCGGCGCCAGGC	11	TGTCGCGGCCCCTCACGGGGCCGTCGCGGCGGCGCCAGGCG	41	0.023923709088076	22.715652	1	-4.505615	F	NA	NA	NA	NA	NA	NA	NA	NA	NA	NA	NA	NA	NA	NA	NA	NA	NA	NA	F	NA	NA	NA	NA	NA	NA	NA	NA	NA	NA	NA	NA	NA	NA	NA	NA	NA	NA	NA
CTTCTCGAGCAGGATGATATCGGCCGACTCC	5	AAGGAGTCGGCCGATATCATCCTGCTCGAGAAGAG	35	0.032558309394998	8.51913	1	-3.090706	F	NA	NA	NA	NA	NA	NA	NA	NA	NA	NA	NA	NA	NA	NA	NA	NA	NA	NA	F	NA	NA	NA	NA	NA	NA	NA	NA	NA	NA	NA	NA	NA	NA	NA	NA	NA	NA	NA
GCCATGACTGCCAGTCCGCTTCAGGTTCAGC	10	CGCTGAACCTGAAGCGGACTGGCAGTCATGGCAGTGACAG	40	0.0287856046624575	1	10.342667	3.370536	F	NA	NA	NA	NA	NA	NA	NA	NA	NA	NA	NA	NA	NA	NA	NA	NA	NA	NA	F	NA	NA	NA	NA	NA	NA	NA	NA	NA	NA	NA	NA	NA	NA	NA	NA	NA	NA	NA
CAACGGCTCGTCGACGCTGGAAGGCTATGTG	4	GCACATAGCCTTCCAGCGTCGACGAGCCGTTGGT	34	0.032277521528839	22.827826	1	-4.512722	T	8569	KI270728.1	515338	515356	NA	15S19M	0	0	0	1	0	15	F	T	0.558823529411765	0.947368421052632	1	1	F	NA	NA	NA	NA	NA	NA	NA	NA	NA	NA	NA	NA	NA	NA	NA	NA	NA	NA	NA
CAGTATATATTACATACTTTCGGTACTTTGA	14	CATAAAATATCAAAGTACCGAAAGTATGTAATATATACTGTACA	44	0.0319987398147631	343.167826	1	-8.42277	T	9519	KI270466.1	540	583	NA	44M	0	0	0	2	0	0	F	F	1	0.954545454545455	2	2	F	NA	NA	NA	NA	NA	NA	NA	NA	NA	NA	NA	NA	NA	NA	NA	NA	NA	NA	NA
AAGCCGTCCGCTGCATTCAAGCGTTACCAGA	32	CCGAGCAGCGTCTGGTAACGCTTGAATGCAGCGGACGGCTTTGCTGTGAGGATCTGCCGTCT	62	0.019458302438365	23.690435	1	-4.566233	F	NA	NA	NA	NA	NA	NA	NA	NA	NA	NA	NA	NA	NA	NA	NA	NA	NA	NA	F	NA	NA	NA	NA	NA	NA	NA	NA	NA	NA	NA	NA	NA	NA	NA	NA	NA	NA	NA
CCCGATTCCGCTACGACCAACTCATACACCA	1	CCCGATTCCGCTACGACCAACTCATACACCA	31	0.0294697233152595	23.071304	5.142	-2.165698	T	10683	chr1	629309	629339	NA	31M	0	0	0	1	0	0	F	F	1	0.967741935483871	2	1	F	NA	ENSG00000225972	MTND1P23	+	unprocessed_pseudogene	NA	NA	NA	NA	NA	NA	NA	NA	NA	NA	NA	NA	T	F
ACCAGGGTGGTATTTCAACGTTGGCTCCATG	2	CACCAGGGTGGTATTTCAACGTTGGCTCCATG	32	0.0183805049436317	7.093913	1	-2.826582	T	2274	chr14	40485962	40485980	NA	19M13S	0	0	0	1	13	0	T	F	0.59375	0.947368421052632	1	1	F	NA	NA	NA	NA	NA	NA	NA	NA	NA	ENSG00000258526	+	AL049828.1	95416	ENSG00000286099	+	AL390800.1	144025	NA	NA
CTGGTGCGCACGGCCAACGGCATGCAGGCCA	66	GTGGCCTGCATGCCGTTGGCCGTGCGCACCAGAAGCTCGTCCTTGAAGATGTGTCGCAGCCTTGAAAGCGCATTGCTCATGGCGGGCTGACTGAGGCCGAC	101	0.00169152547153182	26.607391	1	-4.733755	F	NA	NA	NA	NA	NA	NA	NA	NA	NA	NA	NA	NA	NA	NA	NA	NA	NA	NA	F	NA	NA	NA	NA	NA	NA	NA	NA	NA	NA	NA	NA	NA	NA	NA	NA	NA	NA	NA
AGGCTTCAACAAGGGATGGCGGCTTCAAGGG	71	GCCGAGTCCTGGATGGAGGCTTCAACAAGGGATGGCGGCTTCAAGGGCGAGAATCTCGAAACGCTGATGGCCGTGATGTTCGGCGAGACCTCGCGGAATAC	101	0	29.248261	1.328333	-4.460662	F	NA	NA	NA	NA	NA	NA	NA	NA	NA	NA	NA	NA	NA	NA	NA	NA	NA	NA	F	NA	NA	NA	NA	NA	NA	NA	NA	NA	NA	NA	NA	NA	NA	NA	NA	NA	NA	NA
CCGCTGTCGGACTTCACCGGCGGCGAGAACG	18	ACCCCCGGCAGCCCGTTCTCGCCGCCGGTGAAGTCCGACAGCGGATTG	48	0.0197701659162278	1	4.895	2.291309	F	NA	NA	NA	NA	NA	NA	NA	NA	NA	NA	NA	NA	NA	NA	NA	NA	NA	NA	F	NA	NA	NA	NA	NA	NA	NA	NA	NA	NA	NA	NA	NA	NA	NA	NA	NA	NA	NA
GACCTCGGCTTCGAGTTGCAGGATATCGGGA	42	GCGCGCTAGAGTGACCGCATGTCCCGCGCCTTTACTCACGACCATCCCGATATCCTGCAACTCGAAGCCGAGGTCCTCGACACACGGCCCGGCGCAA	97	0.0155844666140782	18.544348	1.474	-3.653171	F	NA	NA	NA	NA	NA	NA	NA	NA	NA	NA	NA	NA	NA	NA	NA	NA	NA	NA	F	NA	NA	NA	NA	NA	NA	NA	NA	NA	NA	NA	NA	NA	NA	NA	NA	NA	NA	NA
AAGTTCCTGATTCCACACTGCCAAGAAAAGC	1	AAGTTCCTGATTCCACACTGCCAAGAAAAGC	31	0.0294025412272598	16.996522	1	-4.087168	T	1266	chr2	9080098	9080120	NA	8S23M	0	0	0	2	0	8	F	T	0.741935483870968	0.91304347826087	1	2	F	NA	NA	NA	NA	NA	NA	NA	NA	NA	ENSG00000230886	-	HMGB1P25	61200	ENSG00000223640	-	RPL30P3	1274	NA	NA
GGTTTCCATGGGGAACCACACTTCGTGCTCA	8	AGCGCAAGGTTTCCATGGGGAACCACACTTCGTGCTCA	38	0.0398341408595363	50.438261	1.136333	-5.472061	F	NA	NA	NA	NA	NA	NA	NA	NA	NA	NA	NA	NA	NA	NA	NA	NA	NA	NA	F	NA	NA	NA	NA	NA	NA	NA	NA	NA	NA	NA	NA	NA	NA	NA	NA	NA	NA	NA
ACATCATGCAAGCGGGTAATAAGAGGCGCCG	65	CCGCCAACACATTGTCGGAATGAATAAGAACATCATGCAAGCGGGTAATAAGAGGCGCCGACCACACCCTCCCCAACACCGTAGACGTATTCGTCTTCTT	100	0.0349531042531993	70.933043	1	-6.148386	F	NA	NA	NA	NA	NA	NA	NA	NA	NA	NA	NA	NA	NA	NA	NA	NA	NA	NA	F	NA	NA	NA	NA	NA	NA	NA	NA	NA	NA	NA	NA	NA	NA	NA	NA	NA	NA	NA
CCTTTCACGAAAATCTCGCCCGCTTGAAAGC	47	CCCGTCTTTCGATTTGCCTTCACGCGCCAAGCGCTCTGCTTTCAAGCGGGCGAGATTTTCGTGAAAGGATCGTTGCGACTTCGCGTAATCGGTCATTGGT	100	0.0122264594102657	30.33	1	-4.922674	F	NA	NA	NA	NA	NA	NA	NA	NA	NA	NA	NA	NA	NA	NA	NA	NA	NA	NA	F	NA	NA	NA	NA	NA	NA	NA	NA	NA	NA	NA	NA	NA	NA	NA	NA	NA	NA	NA
CAGGGCGGTGGCGGCGGCATCCGACTTCAAG	12	CACACAGGGCGGTGGCGGCGGCATCCGACTTCAAGGCAACCG	42	0.0073770172201722	20.641304	1.469333	-3.812301	T	9450	chr1	27522492	27522513	NA	22M20S	0	0	0	1	20	0	T	F	0.523809523809524	0.954545454545455	1	1	F	NA	NA	NA	NA	NA	NA	NA	NA	NA	ENSG00000158195	-	WASF2	32326	ENSG00000237429	+	BX293535.1	3291	NA	NA
CGATCGGATGCTGGCGCTGAACTACGGCGAG	25	CGGGACGCCGCTGGCAATCATCTCGCCGTAGTTCAGCGCCAGCATCCGATCGCAG	55	0.00268720918510221	1	8.57	3.099295	F	NA	NA	NA	NA	NA	NA	NA	NA	NA	NA	NA	NA	NA	NA	NA	NA	NA	NA	F	NA	NA	NA	NA	NA	NA	NA	NA	NA	NA	NA	NA	NA	NA	NA	NA	NA	NA	NA
AACCGGCTCTCGCCGGATCGAACGAGAAATT	22	TGCCGGAACAACCGGCTCTCGCCGGATCGAACGAGAAATTGCTGCGTCAGAC	52	0.00714407529912257	1	12.832	3.681674	F	NA	NA	NA	NA	NA	NA	NA	NA	NA	NA	NA	NA	NA	NA	NA	NA	NA	NA	F	NA	NA	NA	NA	NA	NA	NA	NA	NA	NA	NA	NA	NA	NA	NA	NA	NA	NA	NA
CCGTCTTTGCCGCCGCCGAGATAGACGGCGA	2	CCGTCTTTGCCGCCGCCGAGATAGACGGCGAG	32	0.0428552673163454	18.647391	3.187667	-2.548401	T	11620	chr6	112508995	112509011	NA	15S17M	0	0	0	1	0	15	F	T	0.53125	0.941176470588235	1	1	F	NA	NA	NA	NA	NA	NA	NA	NA	NA	ENSG00000232299	-	AL357514.1	27360	ENSG00000225580	-	AL358942.1	107691	NA	NA
AAGACGCCAATCGATGACGGCGCTCACCGTA	25	GCCAATCGGGTCGATACGGTGAGCGCCGTCATCGATTGGCGTCTTATGGTCATCGCG	57	0.0212528406903925	81.287826	2.182333	-5.219096	F	NA	NA	NA	NA	NA	NA	NA	NA	NA	NA	NA	NA	NA	NA	NA	NA	NA	NA	F	NA	NA	NA	NA	NA	NA	NA	NA	NA	NA	NA	NA	NA	NA	NA	NA	NA	NA	NA
CCGGGAGAGAAGCGCCGCGCGTTGCTGCATA	9	CCGGGAGAGAAGCGCCGCGCGTTGCTGCATACGATCGCGGAC	42	0.0221523280978332	1	9.556333	3.256457	F	NA	NA	NA	NA	NA	NA	NA	NA	NA	NA	NA	NA	NA	NA	NA	NA	NA	NA	F	NA	NA	NA	NA	NA	NA	NA	NA	NA	NA	NA	NA	NA	NA	NA	NA	NA	NA	NA
ATCCCGATCGGGCCGGACGCGGGCCGGCTCC	8	ATCCCGATCGGGCCGGACGCGGGCCGGCTCCTGAATGT	38	0.028367383699733	17.412174	2.208	-2.979284	F	NA	NA	NA	NA	NA	NA	NA	NA	NA	NA	NA	NA	NA	NA	NA	NA	NA	NA	F	NA	NA	NA	NA	NA	NA	NA	NA	NA	NA	NA	NA	NA	NA	NA	NA	NA	NA	NA
GCCTTGTGATGGCTCTCCCGCGACACTGATA	6	GCCTTGTGATGGCTCTCCCGCGACACTGATATATAA	36	0.0394677986611323	41.607391	3.215	-3.693949	F	NA	NA	NA	NA	NA	NA	NA	NA	NA	NA	NA	NA	NA	NA	NA	NA	NA	NA	F	NA	NA	NA	NA	NA	NA	NA	NA	NA	NA	NA	NA	NA	NA	NA	NA	NA	NA	NA
CCACCGATCCCTATCTGCGCGACCGGCTGCA	5	CCACCGATCCCTATCTGCGCGACCGGCTGCACGAC	35	0.0483323761539965	16.687391	1	-4.060687	F	NA	NA	NA	NA	NA	NA	NA	NA	NA	NA	NA	NA	NA	NA	NA	NA	NA	NA	F	NA	NA	NA	NA	NA	NA	NA	NA	NA	NA	NA	NA	NA	NA	NA	NA	NA	NA	NA
CCTCATGCAGCTTTGCGAGGTAGGCATCATC	20	GCCTCATGCAGCTTTGCGAGGTAGGCATCATCGGCTTCGGCAAACACCAG	50	0.0209096242801556	6.906087	1	-2.787869	F	NA	NA	NA	NA	NA	NA	NA	NA	NA	NA	NA	NA	NA	NA	NA	NA	NA	NA	T	chr6:162371387:+|chr8:24522000:-	NA	NA	NA	NA	NA	NA	NA	NA	NA	NA	NA	NA	NA	NA	NA	NA	NA	NA
GGAATGGAATCATCATCGAATGGACTCAAAC	1	GGAATGGAATCATCATCGAATGGACTCAAAC	31	0.0486161913244321	96.077391	1	-6.586125	T	18716	chr7	57486511	57486541	NA	31M	0	0	0	1	0	0	F	F	1	0.967741935483871	3	1	F	NA	NA	NA	NA	NA	NA	NA	NA	NA	ENSG00000270957	+	AC092175.1	617	ENSG00000233601	+	NCOR1P3	113252	NA	NA
AAGGCAAGACGTGATCGGGGAACTGCCCTGC	17	GCTGCGTCAGGAAGGCAAGACGTGATCGGGGAACTGCCCTGCAAATG	47	0.00971976407339593	34.014783	1.356333	-4.648379	F	NA	NA	NA	NA	NA	NA	NA	NA	NA	NA	NA	NA	NA	NA	NA	NA	NA	NA	F	NA	NA	NA	NA	NA	NA	NA	NA	NA	NA	NA	NA	NA	NA	NA	NA	NA	NA	NA
CGCAAATGTAGGCTGATCACTCTCGATATCC	49	ATAGATCCGCAAATGTAGGCTGATCACTCTCGATATCCCGTTCCAGCACGAACGCGATTTCGGCCTCCACCTTCGGCTGC	80	0.01083146777945	1.04087	13.019667	3.644831	F	NA	NA	NA	NA	NA	NA	NA	NA	NA	NA	NA	NA	NA	NA	NA	NA	NA	NA	F	NA	NA	NA	NA	NA	NA	NA	NA	NA	NA	NA	NA	NA	NA	NA	NA	NA	NA	NA
GATTTCTCCCCCCTACCCTCCCCTTTTCCCC	2	GATTTCTCCCCCCTACCCTCCCCTTTTCCCCT	32	0.0460074628185772	98.326957	1	-6.619515	T	17240	chr6	103983705	103983731	NA	5S27M	0	0	0	4	0	5	F	T	0.84375	0.851851851851852	1	4	F	NA	NA	NA	NA	NA	NA	NA	NA	NA	ENSG00000288084	-	AL590608.1	109019	ENSG00000216817	-	R3HDM2P2	33901	NA	NA
CCTTGGAGGGAATGGATGGAGGCATCGTTGC	15	CGAGAAGCGGACCTTGGAGGGAATGGATGGAGGCATCGTTGCGCC	45	0.0279433672928758	10.547826	1	-3.398874	F	NA	NA	NA	NA	NA	NA	NA	NA	NA	NA	NA	NA	NA	NA	NA	NA	NA	NA	F	NA	NA	NA	NA	NA	NA	NA	NA	NA	NA	NA	NA	NA	NA	NA	NA	NA	NA	NA
GGGCAAGCTTTATGGCAACATTCGAGATTAC	15	GAGCCGCTTGGGCTGGGCAAGCTTTATGGCAACATTCGAGATTAC	45	0.0271428454368183	1.357826	8.530333	2.651303	F	NA	NA	NA	NA	NA	NA	NA	NA	NA	NA	NA	NA	NA	NA	NA	NA	NA	NA	F	NA	NA	NA	NA	NA	NA	NA	NA	NA	NA	NA	NA	NA	NA	NA	NA	NA	NA	NA
CTGCAATCATGGCTACCTCCGGCCTCAGCAC	20	GGAATCATGGTGCTGAGGCCGGAGGTAGCCATGATTGCAGCCACCGCAAA	50	0.0265208110817706	52.682174	1	-5.719243	F	NA	NA	NA	NA	NA	NA	NA	NA	NA	NA	NA	NA	NA	NA	NA	NA	NA	NA	F	NA	NA	NA	NA	NA	NA	NA	NA	NA	NA	NA	NA	NA	NA	NA	NA	NA	NA	NA
TCTTTTATGTTCACATTGCATCCACATCCCA	10	AGTAAGTTTTGGGATGTGGATGCAATGTGAACATAAAAGA	40	0.0370367292384684	1	12.032333	3.588844	T	20601	chr7	77277547	77277575	NA	29M11S	0	0	0	0	11	0	T	F	0.725	1	1	0	F	NA	ENSG00000135205	CCDC146	+	protein_coding	NA	NA	NA	NA	NA	NA	NA	NA	NA	NA	NA	NA	F	T
CCATTCAGATCCATTCCATTTCATTCCATTC	36	CCATTCCATTCCATTCCAGTTGACTCCATTGGATTCCATTCAGATCCATTCCATTTCATTCCATTC	66	0.0333603547146155	37.50087	1	-5.228852	T	10603	GL000216.2	13231	13306	NA	22M10D44M	0	1	0	16	0	0	F	F	1	0.742424242424242	1	17	F	NA	NA	NA	NA	NA	NA	NA	NA	NA	NA	NA	NA	NA	NA	NA	NA	NA	NA	NA
CAGAAGCCGTTGATCATCCAGCAGCGCACGA	6	TCGTGCGCTGCTGGATGATCAACGGCTTCTGTACGA	36	0.0389390432304508	9.531739	2.934667	-1.699543	F	NA	NA	NA	NA	NA	NA	NA	NA	NA	NA	NA	NA	NA	NA	NA	NA	NA	NA	F	NA	NA	NA	NA	NA	NA	NA	NA	NA	NA	NA	NA	NA	NA	NA	NA	NA	NA	NA
ACGGAGATTCTGGAGACGATCTTCGGACTAC	22	GGACGCACGGAGATTCTGGAGACGATCTTCGGACTACGGCCGGTCGAGCGCG	52	0.0140311063996449	36.178261	2.260333	-4.000516	F	NA	NA	NA	NA	NA	NA	NA	NA	NA	NA	NA	NA	NA	NA	NA	NA	NA	NA	F	NA	NA	NA	NA	NA	NA	NA	NA	NA	NA	NA	NA	NA	NA	NA	NA	NA	NA	NA
CCGTTCTCGCCGACCAGCGCATGGATCTGGC	3	GCCAGATCCATGCGCTGGTCGGCGAGAACGGCG	33	0.0343363954403255	1	7.069	2.821506	F	NA	NA	NA	NA	NA	NA	NA	NA	NA	NA	NA	NA	NA	NA	NA	NA	NA	NA	F	NA	NA	NA	NA	NA	NA	NA	NA	NA	NA	NA	NA	NA	NA	NA	NA	NA	NA	NA
ATGAGCCGGACGGTCAGGCGTAGTCAGGGAG	3	GCTCCCTGACTACGCCTGACCGTCCGGCTCATC	33	0.0455294187044728	60.416522	1.332333	-5.502917	T	7560	chr17	39737848	39737863	NA	17S16M	0	0	0	1	0	17	F	T	0.484848484848485	0.9375	1	1	F	NA	NA	NA	NA	NA	NA	NA	NA	NA	ENSG00000141741	-	MIEN1	7317	ENSG00000141738	+	GRB7	63	NA	NA
CTGATTATGATGGGTATTACTATGAAGAAGA	2	ATCTTCTTCATAGTAATACCCATCATAATCAG	32	0.0292669536340852	1.10913	7.715	2.798238	T	15817	chr1	631269	631300	NA	32M	0	0	0	1	0	0	F	F	1	0.96875	2	1	F	NA	ENSG00000237973	MTCO1P12	+	unprocessed_pseudogene	NA	NA	NA	NA	NA	NA	NA	NA	NA	NA	NA	NA	T	F
GACCAGATCTTGCTCGAACAAGAGATGCGAC	13	GACCAGATCTTGCTCGAACAAGAGATGCGACCACGGGCGCTTT	43	0.0410213374998711	1	5.022	2.328262	F	NA	NA	NA	NA	NA	NA	NA	NA	NA	NA	NA	NA	NA	NA	NA	NA	NA	NA	F	NA	NA	NA	NA	NA	NA	NA	NA	NA	NA	NA	NA	NA	NA	NA	NA	NA	NA	NA
GCCGCATGCCGGTGATGCTGAAAGGCCCCAC	1	GCCGCATGCCGGTGATGCTGAAAGGCCCCAC	31	0.0407883127318832	1	6.047333	2.596299	T	17703	chr1	111706701	111706717	NA	17M14S	0	0	0	1	14	0	T	F	0.548387096774194	0.941176470588235	1	1	F	NA	ENSG00000116473	RAP1A	+	protein_coding	NA	NA	NA	NA	NA	NA	NA	NA	NA	NA	NA	NA	T	F
ACCTTAGCTCTCACCATCGCTCTTCTACTAC	1	ACCTTAGCTCTCACCATCGCTCTTCTACTAC	31	0.0397639514109272	1.624348	8.812	2.439609	T	2648	chrM	3532	3562	NA	31M	0	0	0	1	0	0	F	F	1	0.967741935483871	1	1	F	NA	ENSG00000198888	MT-ND1	+	protein_coding	NA	NA	NA	NA	NA	NA	NA	NA	NA	NA	NA	NA	T	F
CGAGGCCGTAATAGTGCACGGCTACCTTGAC	19	GGCTGTTGAGCTCCAGGATTTCGAGGCCGTAATAGTGCACGGCTACCTTGAC	52	0.0167392444883462	1.516522	9.786333	2.690002	F	NA	NA	NA	NA	NA	NA	NA	NA	NA	NA	NA	NA	NA	NA	NA	NA	NA	NA	F	NA	NA	NA	NA	NA	NA	NA	NA	NA	NA	NA	NA	NA	NA	NA	NA	NA	NA	NA
CGCCTCGGTCGGTCGGCCCTCGGCCTCCGCC	31	GGCGGAGGCCGAGGGCCGACCGACCGAGGCGCTGCACGCACTCCTCGCGACGCGCGATCCC	61	0.0428715316725979	31.750435	1	-4.988704	F	NA	NA	NA	NA	NA	NA	NA	NA	NA	NA	NA	NA	NA	NA	NA	NA	NA	NA	F	NA	NA	NA	NA	NA	NA	NA	NA	NA	NA	NA	NA	NA	NA	NA	NA	NA	NA	NA
AGTGTAGGATAGGGTGTAGATCTAGGTGGTA	2	AGTGTAGGATAGGGTGTAGATCTAGGTGGTAG	32	0.0490549790985977	27.97087	1.074667	-4.701964	T	6197	chr7	84870312	84870327	NA	16S16M	0	0	0	0	0	16	F	T	0.5	1	1	0	F	NA	NA	NA	NA	NA	NA	NA	NA	NA	ENSG00000235243	-	AC093716.1	22060	ENSG00000232605	+	HMGN2P11	6226	NA	NA
CGCGCATAGTGGCGCGCGGCGCGGCATTCGC	16	CGCAACATCGCGCATAGTGGCGCGCGGCGCGGCATTCGCGCCAACC	46	0.0177403001078416	15.144348	1	-3.920708	F	NA	NA	NA	NA	NA	NA	NA	NA	NA	NA	NA	NA	NA	NA	NA	NA	NA	NA	F	NA	NA	NA	NA	NA	NA	NA	NA	NA	NA	NA	NA	NA	NA	NA	NA	NA	NA	NA
CAATGTTGGTCGAGGCGGCTTGGCAGGCGGC	28	CGCGCAGTGGACCGGGCCCCCGCGCCGCCTGCCAAGCCGCCTCGACCAACATTGTGCG	58	0.0147422625071239	18.312609	1.630333	-3.489599	F	NA	NA	NA	NA	NA	NA	NA	NA	NA	NA	NA	NA	NA	NA	NA	NA	NA	NA	F	NA	NA	NA	NA	NA	NA	NA	NA	NA	NA	NA	NA	NA	NA	NA	NA	NA	NA	NA
CGGCGTGTCCCGCACGTCCAAGACGCTCTCC	48	CCAGCGGCCCGTTGGCGGTACGGATACCGCGATTGGCCCGATAAATGGAGAGCGTCTTGGACGTGCGGGACACGCCGG	78	0.0073770172201722	41.870435	2.93	-3.836959	F	NA	NA	NA	NA	NA	NA	NA	NA	NA	NA	NA	NA	NA	NA	NA	NA	NA	NA	F	NA	NA	NA	NA	NA	NA	NA	NA	NA	NA	NA	NA	NA	NA	NA	NA	NA	NA	NA
CCTGAAATCGATCAAGGACAACGACGTCAAA	35	GTATTCATGAAGACCGCCAAAGACGTCCTGAAATCGATCAAGGACAACGACGTCAAATACGTCGAC	66	0.0463800682976984	32.433913	1.748	-4.213726	F	NA	NA	NA	NA	NA	NA	NA	NA	NA	NA	NA	NA	NA	NA	NA	NA	NA	NA	F	NA	NA	NA	NA	NA	NA	NA	NA	NA	NA	NA	NA	NA	NA	NA	NA	NA	NA	NA
CGCATGCGTTGGAGGAGGCGCTGACGATCTC	34	CGATCGGAGATCGTCAGCGCCTCCTCCAACGCATGCGAAATGAAGATGACGGACACCCCTTCGC	64	0.0375722686068233	9.452609	1	-3.240713	F	NA	NA	NA	NA	NA	NA	NA	NA	NA	NA	NA	NA	NA	NA	NA	NA	NA	NA	F	NA	NA	NA	NA	NA	NA	NA	NA	NA	NA	NA	NA	NA	NA	NA	NA	NA	NA	NA
ACGTCGTCGACGGTGATCCCTGTCTCGGCAG	26	CCATTGACTGCCGAGACAGGGATCACCGTCGACGACGTCGCCAAGCGCCTCATCGA	56	0.02165336118832	52.662609	1	-5.718707	F	NA	NA	NA	NA	NA	NA	NA	NA	NA	NA	NA	NA	NA	NA	NA	NA	NA	NA	F	NA	NA	NA	NA	NA	NA	NA	NA	NA	NA	NA	NA	NA	NA	NA	NA	NA	NA	NA
ATATAGGCGATCAGCAGCAGCGGTATCAGCC	5	GATCATATAGGCGATCAGCAGCAGCGGTATCAGCC	35	0.00833102380626	18.969565	1	-4.245615	F	NA	NA	NA	NA	NA	NA	NA	NA	NA	NA	NA	NA	NA	NA	NA	NA	NA	NA	F	NA	NA	NA	NA	NA	NA	NA	NA	NA	NA	NA	NA	NA	NA	NA	NA	NA	NA	NA
ATGCCGGCCTTCTGGCAGGCCTGCTTGACGA	18	AGGCGATCGTCAAGCAGGCCTGCCAGAAGGCCGGCATCGATGTCGAGC	48	0.0179398805778491	1.62913	13.961667	3.099298	F	NA	NA	NA	NA	NA	NA	NA	NA	NA	NA	NA	NA	NA	NA	NA	NA	NA	NA	F	NA	NA	NA	NA	NA	NA	NA	NA	NA	NA	NA	NA	NA	NA	NA	NA	NA	NA	NA
CATCTCCGCCCGCGCCTTCAGCCGGTTAGAC	50	CCCGGATGAGGCTGTCGAGTTGATGCGGGAGTCTAACCGGCTGAAGGCGCGGGCGGAGATGCTGCGTAAGCGGGCGTTAG	80	0.0333200038866582	63.981739	1	-5.999588	F	NA	NA	NA	NA	NA	NA	NA	NA	NA	NA	NA	NA	NA	NA	NA	NA	NA	NA	F	NA	NA	NA	NA	NA	NA	NA	NA	NA	NA	NA	NA	NA	NA	NA	NA	NA	NA	NA
CCGCTGGTCTGGCTGTTCATCTTCGCGGCCG	10	CGGAAGCCGGCCGCGAAGATGAACAGCCAGACCAGCGGCC	40	0.0201387241491508	1.393913	8.962667	2.684788	F	NA	NA	NA	NA	NA	NA	NA	NA	NA	NA	NA	NA	NA	NA	NA	NA	NA	NA	F	NA	NA	NA	NA	NA	NA	NA	NA	NA	NA	NA	NA	NA	NA	NA	NA	NA	NA	NA
ATCACGACCAGGCGCTGATCCCGATCAAGAC	36	CGATCTGCATGTATCACGACCAGGCGCTGATCCCGATCAAGACGGTCGCGTTCGAGGACGCCGTCA	66	0.0189122141760848	8.346087	1.16	-2.846975	F	NA	NA	NA	NA	NA	NA	NA	NA	NA	NA	NA	NA	NA	NA	NA	NA	NA	NA	F	NA	NA	NA	NA	NA	NA	NA	NA	NA	NA	NA	NA	NA	NA	NA	NA	NA	NA	NA
AATAATAGGTGAGTGCGGGCAGGTTGATGCC	29	GGCATCAACCTGCCCGCACTCACCTATTATTTCGGCAACAAGGAAGGCCTGTATCTCGC	59	0.0338272771197373	7.842174	1	-2.971254	F	NA	NA	NA	NA	NA	NA	NA	NA	NA	NA	NA	NA	NA	NA	NA	NA	NA	NA	F	NA	NA	NA	NA	NA	NA	NA	NA	NA	NA	NA	NA	NA	NA	NA	NA	NA	NA	NA
ACGCCGGTCCGTCTACTGCTGTTCGTGCTGA	29	CGACAGCAACAGCCCGCCCAGCATCAGCACGAACAGCAGTAGACGGACCGGCGTCAGCTCG	61	0.0297786630894571	62.696522	1	-5.970314	F	NA	NA	NA	NA	NA	NA	NA	NA	NA	NA	NA	NA	NA	NA	NA	NA	NA	NA	F	NA	NA	NA	NA	NA	NA	NA	NA	NA	NA	NA	NA	NA	NA	NA	NA	NA	NA	NA
ATACAGCACCAGCGCCATCGCACAGGCGGCG	63	CGGCAGGCCAAACGGGGTACGCGAGCGATGCCAGGTCAGATACAGCACCAGCGCCATCGCACAGGCGGCGCTGAGTTCGGAGATCGTGATCAT	93	0.0131364244286752	1	13.190667	3.721446	F	NA	NA	NA	NA	NA	NA	NA	NA	NA	NA	NA	NA	NA	NA	NA	NA	NA	NA	F	NA	NA	NA	NA	NA	NA	NA	NA	NA	NA	NA	NA	NA	NA	NA	NA	NA	NA	NA
CCCGGCGACGACTGGCGGTTGGGTGGTCGCC	39	AGGCCGATCGCGGCGACCACCCAACCGCCAGTCGTCGCCGGGATGCCGCGATCGGCAAGATAGGCCGGC	69	0.0202119753726507	1	6.699	2.743946	F	NA	NA	NA	NA	NA	NA	NA	NA	NA	NA	NA	NA	NA	NA	NA	NA	NA	NA	F	NA	NA	NA	NA	NA	NA	NA	NA	NA	NA	NA	NA	NA	NA	NA	NA	NA	NA	NA
CCTGTGTCACCGACCTCGATGGACGGATCAC	22	CCTGTGTCACCGACCTCGATGGACGGATCACCGGCGTGCACCGCACCTGGCT	52	0.032929042230196	12.935217	1.034667	-3.644066	F	NA	NA	NA	NA	NA	NA	NA	NA	NA	NA	NA	NA	NA	NA	NA	NA	NA	NA	T	chr16:31537313:+|chr1:229428898:-	NA	NA	NA	NA	NA	NA	NA	NA	NA	NA	NA	NA	NA	NA	NA	NA	NA	NA
ACGATGCTGGCTCGATTCCGCGATCCCGATC	70	CCACCGATGCGCACCGTACCGAGATCGGGATCGCGGAATCGAGCCAGCATCGTCGCGAGGGTCGACTTGCCCGACCCGGACGGCCCCACCAGGGCCGTGA	100	0.023923709088076	57.905217	1	-5.855621	F	NA	NA	NA	NA	NA	NA	NA	NA	NA	NA	NA	NA	NA	NA	NA	NA	NA	NA	F	NA	NA	NA	NA	NA	NA	NA	NA	NA	NA	NA	NA	NA	NA	NA	NA	NA	NA	NA
GTCTCGCGGATGTCGGCCTCCGGCGCGCTGA	52	GAATTCGTCTCGCGGATGTCGGCCTCCGGCGCGCTGATGGGCAATTTCGACGCCACCGAACGGCTGTTGCAGCAGTACCTGC	82	0.00388660348319158	41.495217	2.232	-4.216536	F	NA	NA	NA	NA	NA	NA	NA	NA	NA	NA	NA	NA	NA	NA	NA	NA	NA	NA	F	NA	NA	NA	NA	NA	NA	NA	NA	NA	NA	NA	NA	NA	NA	NA	NA	NA	NA	NA
CCCTCCGGGTGTCCGACCTGTGCCTGATCCC	5	CCCTCCGGGTGTCCGACCTGTGCCTGATCCCAGTGCGCGCTTCGGTACT	49	0.0178064492481922	21.725652	4.144	-2.390304	F	NA	NA	NA	NA	NA	NA	NA	NA	NA	NA	NA	NA	NA	NA	NA	NA	NA	NA	F	NA	NA	NA	NA	NA	NA	NA	NA	NA	NA	NA	NA	NA	NA	NA	NA	NA	NA	NA
CCGCTCGGCCTCAAGGACTGGACCGGCACGA	8	GCCGATCGTGCCGGTCCAGTCCTTGAGGCCGAGCGGGT	38	0.0487951347113553	8.822174	1	-3.141134	F	NA	NA	NA	NA	NA	NA	NA	NA	NA	NA	NA	NA	NA	NA	NA	NA	NA	NA	F	NA	NA	NA	NA	NA	NA	NA	NA	NA	NA	NA	NA	NA	NA	NA	NA	NA	NA	NA
AATTCTGCGCTTCCGGGGGCAGGGCGGAGGC	5	GAAATTCTGCGCTTCCGGGGGCAGGGCGGAGGCGC	35	0.04729376917485	1	8.511667	3.089442	T	1679	chr9	134188664	134188682	NA	16S19M	0	0	0	1	0	16	F	T	0.542857142857143	0.947368421052632	1	1	F	NA	NA	NA	NA	NA	NA	NA	NA	NA	ENSG00000273473	+	BX649601.1	19325	ENSG00000223729	-	LINC02247	105248	NA	NA
CATCGCTGGCACCTGGGGCACGTAGGCCAGC	4	TCATCGCTGGCACCTGGGGCACGTAGGCCAGCTG	34	0.0488257026871869	55.167826	1	-5.785755	F	NA	NA	NA	NA	NA	NA	NA	NA	NA	NA	NA	NA	NA	NA	NA	NA	NA	NA	F	NA	NA	NA	NA	NA	NA	NA	NA	NA	NA	NA	NA	NA	NA	NA	NA	NA	NA	NA
GCACGCCGAAGAAGGCTGCCGACCGTTCGGC	18	TGCAACGCAACGCCGAACGGTCGGCAGCCTTCTTCGGCGTGCCGGCCG	48	0.0474769040541369	1	3.81	1.929791	F	NA	NA	NA	NA	NA	NA	NA	NA	NA	NA	NA	NA	NA	NA	NA	NA	NA	NA	F	NA	NA	NA	NA	NA	NA	NA	NA	NA	NA	NA	NA	NA	NA	NA	NA	NA	NA	NA
ACATGCTGTGAATCGACGTCACTTCCGCACA	34	AAGAAACAACATGCTGTGAATCGACGTCACTTCCGCACACAGCACAACGTTGCGAGCCGAGTGA	64	0.0419760162988115	44.217826	1	-5.466556	F	NA	NA	NA	NA	NA	NA	NA	NA	NA	NA	NA	NA	NA	NA	NA	NA	NA	NA	F	NA	NA	NA	NA	NA	NA	NA	NA	NA	NA	NA	NA	NA	NA	NA	NA	NA	NA	NA
ACCGGCACCCACAGGCGCTTGGTGGTGTGCT	2	GACCGGCACCCACAGGCGCTTGGTGGTGTGCT	32	0.0243615740035542	51.306957	1.091	-5.555431	T	2502	chr21	46663582	46663597	NA	16S16M	0	0	0	0	0	16	F	T	0.5	1	1	0	F	NA	ENSG00000160310	PRMT2	+	protein_coding	NA	NA	NA	NA	NA	NA	NA	NA	NA	NA	NA	NA	F	T
CGAGGTCGACGCCGTCGAGCAGGATCTGGCC	14	CATTGACGCCCGATGGCGGCCAGATCCTGCTCGACGGCGTCGACCTCGC	49	0.028367383699733	7.841304	1.097333	-2.837092	F	NA	NA	NA	NA	NA	NA	NA	NA	NA	NA	NA	NA	NA	NA	NA	NA	NA	NA	F	NA	NA	NA	NA	NA	NA	NA	NA	NA	NA	NA	NA	NA	NA	NA	NA	NA	NA	NA
AGGTCTCATCGCGCCTCACTGGCCACGCCCC	26	GGGAGCCCTCACCGACGAGGTCTCATCGCGCCTCACTGGCCACGCCCCAGCAACCG	56	0.0423115536922175	33.73087	1	-5.075998	F	NA	NA	NA	NA	NA	NA	NA	NA	NA	NA	NA	NA	NA	NA	NA	NA	NA	NA	F	NA	NA	NA	NA	NA	NA	NA	NA	NA	NA	NA	NA	NA	NA	NA	NA	NA	NA	NA
GTATACGAAGCTTGCCGGTGAGAATCGTCAA	21	CCAATTTCATCCGCGGTATACGAAGCTTGCCGGTGAGAATCGTCAATTGAG	51	0.019458302438365	21.498261	1	-4.426148	F	NA	NA	NA	NA	NA	NA	NA	NA	NA	NA	NA	NA	NA	NA	NA	NA	NA	NA	F	NA	NA	NA	NA	NA	NA	NA	NA	NA	NA	NA	NA	NA	NA	NA	NA	NA	NA	NA
CGCCGTGGGAAAGGAGTGGCTGATGGTCTGC	24	GGGAGCAGACCATCAGCCACTCCTTTCCCACGGCGAGCCGCGCGACCCATCGCG	54	0.0123556423523775	42.137391	3.306333	-3.671797	F	NA	NA	NA	NA	NA	NA	NA	NA	NA	NA	NA	NA	NA	NA	NA	NA	NA	NA	F	NA	NA	NA	NA	NA	NA	NA	NA	NA	NA	NA	NA	NA	NA	NA	NA	NA	NA	NA
GGCAGGCTGGCGCCGGAGCGGCCGAGACCGA	3	GGCAGGCTGGCGCCGGAGCGGCCGAGACCGACC	33	0.0443253489696645	1	6.104	2.609755	T	18941	chr7	954772	954789	NA	7S18M8S	0	0	0	0	8	7	T	T	0.545454545454545	1	1	0	F	NA	ENSG00000240230	COX19	-	protein_coding	NA	NA	NA	NA	NA	NA	NA	NA	NA	NA	NA	NA	F	T
AATCTAGCTTCCAGACTTTGTACCTAACACC	13	AGAAGAGCCGGGTGTTAGGTACAAAGTCTGGAAGCTAGATTAT	43	0.0265208110817706	10.317826	1.485667	-2.795956	F	NA	NA	NA	NA	NA	NA	NA	NA	NA	NA	NA	NA	NA	NA	NA	NA	NA	NA	F	NA	NA	NA	NA	NA	NA	NA	NA	NA	NA	NA	NA	NA	NA	NA	NA	NA	NA	NA
GCGCCGGATAGGCTGCCTTCGAGCACAGGAA	15	TTCCTGTGCTCGAAGGCAGCCTATCCGGCGCTGAAGGCGTCGGGT	45	0.0429477804952848	1	6.487	2.697551	F	NA	NA	NA	NA	NA	NA	NA	NA	NA	NA	NA	NA	NA	NA	NA	NA	NA	NA	F	NA	NA	NA	NA	NA	NA	NA	NA	NA	NA	NA	NA	NA	NA	NA	NA	NA	NA	NA
ACCGTTAAACCCTAGCTCCGGACAAACCGAT	10	GCTCTACCAACCGTTAAACCCTAGCTCCGGACAAACCGAT	40	0.0349398476708779	1	7.545	2.915521	F	NA	NA	NA	NA	NA	NA	NA	NA	NA	NA	NA	NA	NA	NA	NA	NA	NA	NA	F	NA	NA	NA	NA	NA	NA	NA	NA	NA	NA	NA	NA	NA	NA	NA	NA	NA	NA	NA
CCTGACCACGCCGCATGGCGTGGTGCGGACG	64	CATTTCGAGCTGCTGGCGACCGATGGCGCGGCCCGCACCGGGCGCCTGACCACGCCGCATGGCGTGGTGCGGACGCCGGCCTTCATGCCGGTCG	94	0.00573658027233477	29.721739	2.91	-3.352427	F	NA	NA	NA	NA	NA	NA	NA	NA	NA	NA	NA	NA	NA	NA	NA	NA	NA	NA	F	NA	NA	NA	NA	NA	NA	NA	NA	NA	NA	NA	NA	NA	NA	NA	NA	NA	NA	NA
CCCGACCAAACTGCATTCCAAATCTTCGACC	14	CCCGACCAAACTGCATTCCAAATCTTCGACCAAAACGCCGTCGGCTT	47	0.0333385436023285	10.42087	1.361	-2.936737	F	NA	NA	NA	NA	NA	NA	NA	NA	NA	NA	NA	NA	NA	NA	NA	NA	NA	NA	F	NA	NA	NA	NA	NA	NA	NA	NA	NA	NA	NA	NA	NA	NA	NA	NA	NA	NA	NA
AATCTATATTTGATGTACTTTCATATTTTCT	7	AGGTACAGAAAATATGAAAGTACATCAAATATAGATT	37	0.0225355548300255	156.65087	1	-7.291409	T	1411	chr3	93470448	93470484	NA	37M	0	0	0	1	0	0	F	F	1	0.972972972972973	1	1	F	NA	NA	NA	NA	NA	NA	NA	NA	NA	ENSG00000283544	-	ABBA01000935.2	1956674	ENSG00000251727	+	RNU6-488P	373279	NA	NA
CGACCAACTTCCTGTCTTCGCTAACGGCAAG	29	GTGACGACGACCAACTTCCTGTCTTCGCTAACGGCAAGTCTGCTCGGTAACCTCACGCTCAAC	63	0.0319987398147631	30.031739	1	-4.908416	F	NA	NA	NA	NA	NA	NA	NA	NA	NA	NA	NA	NA	NA	NA	NA	NA	NA	NA	F	NA	NA	NA	NA	NA	NA	NA	NA	NA	NA	NA	NA	NA	NA	NA	NA	NA	NA	NA
CGGCAGCGGACTTACCGCGCGCGGCTATGAG	27	GGAAGAAGAACAGGTTGGCGACCTCATAGCCGCGCGCGGTAAGTCCGCTGCCGAGCAG	58	0.0239770155096968	18.477391	2.569	-2.846482	F	NA	NA	NA	NA	NA	NA	NA	NA	NA	NA	NA	NA	NA	NA	NA	NA	NA	NA	F	NA	NA	NA	NA	NA	NA	NA	NA	NA	NA	NA	NA	NA	NA	NA	NA	NA	NA	NA
TCGGATCACCGTCCGTTCACCAACTCCCCGA	18	GATAAGCCTCGGGGAGTTGGTGAACGGACGGTGATCCGAGGGTGTCCG	48	0.0441090354116542	128.445652	1	-7.005014	F	NA	NA	NA	NA	NA	NA	NA	NA	NA	NA	NA	NA	NA	NA	NA	NA	NA	NA	F	NA	NA	NA	NA	NA	NA	NA	NA	NA	NA	NA	NA	NA	NA	NA	NA	NA	NA	NA
CAGGGAAGATGAACGTCCAGACCCAGATCCG	1	CAGGGAAGATGAACGTCCAGACCCAGATCCG	31	0.0330967648450143	6.507826	1	-2.702176	F	NA	NA	NA	NA	NA	NA	NA	NA	NA	NA	NA	NA	NA	NA	NA	NA	NA	NA	F	NA	NA	NA	NA	NA	NA	NA	NA	NA	NA	NA	NA	NA	NA	NA	NA	NA	NA	NA
CAGGCCGCCGCGCATTCGGTCGGCCGATCGG	2	CAGGCCGCCGCGCATTCGGTCGGCCGATCGGC	32	0.0175257797765166	9.395652	1	-3.231993	T	9308	chr2	66433494	66433509	NA	16S16M	0	0	0	0	0	16	F	T	0.5	1	1	0	F	NA	ENSG00000143995	MEIS1	+	protein_coding	NA	NA	NA	NA	NA	NA	NA	NA	NA	NA	NA	NA	T	F
AGTTCAATTCAACAATGTCGGTCTCTTCATG	34	CATGAAGAGACCGACATTGTTGAATTGAACTCCGAGATCGCTCGTATTGTAGAGCGTCAATCAC	64	0.033275990350789	54.26087	1	-5.76184	F	NA	NA	NA	NA	NA	NA	NA	NA	NA	NA	NA	NA	NA	NA	NA	NA	NA	NA	F	NA	NA	NA	NA	NA	NA	NA	NA	NA	NA	NA	NA	NA	NA	NA	NA	NA	NA	NA
CGACTACGAGCCGGAGGAGCCCGTCACGCCC	3	TACGACTACGAGCCGGAGGAGCCCGTCACGCCC	33	0.0414110061474576	22.155652	1.317667	-4.071617	T	12907	chr11	122882725	122882740	NA	8S16M9S	0	0	0	0	9	8	T	T	0.484848484848485	1	1	0	F	NA	ENSG00000109944	JHY	+	protein_coding	NA	NA	NA	NA	NA	NA	NA	NA	NA	NA	NA	NA	T	F
CCGGAATCAGGCATGCGAACTCGAATTCGCC	8	CCCGGAATCAGGCATGCGAACTCGAATTCGCCGGCCTT	38	0.0319075544231586	20.781739	2.577	-3.011552	F	NA	NA	NA	NA	NA	NA	NA	NA	NA	NA	NA	NA	NA	NA	NA	NA	NA	NA	F	NA	NA	NA	NA	NA	NA	NA	NA	NA	NA	NA	NA	NA	NA	NA	NA	NA	NA	NA
CATGACGCTCGCAACGATCCAGGCGAGGGCC	6	TCGCGGGCCCTCGCCTGGATCGTTGCGAGCGTCATG	36	0.0418287855376482	12.592174	1	-3.654455	F	NA	NA	NA	NA	NA	NA	NA	NA	NA	NA	NA	NA	NA	NA	NA	NA	NA	NA	F	NA	NA	NA	NA	NA	NA	NA	NA	NA	NA	NA	NA	NA	NA	NA	NA	NA	NA	NA
GCCGGTCACGCCTGGAGTATGCGAATCTCAA	28	AGCACCACGCCGGTGAGATCGGCATCCTTGAGATTCGCATACTCCAGGCGTGACCGGC	58	0.0178064492481922	7.741739	1	-2.952658	F	NA	NA	NA	NA	NA	NA	NA	NA	NA	NA	NA	NA	NA	NA	NA	NA	NA	NA	F	NA	NA	NA	NA	NA	NA	NA	NA	NA	NA	NA	NA	NA	NA	NA	NA	NA	NA	NA
AATGTAAGGCCCGATCGGCGCTTGGCGCCGA	98	GATGCCCGCCGTCCAGCTCAATGATCAACCGTTTAGCCGGGCAAAAGAAGTCAACAATGTAAGGCCCGATCGGCGCTTGGCGCCGAAAATGGGAGCCATCGGTCGGCAGCTCCCTCAACGCTCGCCAGAGGATT	134	0	44.438261	1	-5.47373	F	NA	NA	NA	NA	NA	NA	NA	NA	NA	NA	NA	NA	NA	NA	NA	NA	NA	NA	F	NA	NA	NA	NA	NA	NA	NA	NA	NA	NA	NA	NA	NA	NA	NA	NA	NA	NA	NA
ATATTGAGAACGACATCGGCGGAATGGACGC	50	GCGGGTTCACGTTGACGGGCCAGGATATTGAGAACGACATCGGCGGAATGGACGCTGTGACTGAGCGCCTCGGCACAGGC	80	0.0106908320161543	1	8.875333	3.149801	F	NA	NA	NA	NA	NA	NA	NA	NA	NA	NA	NA	NA	NA	NA	NA	NA	NA	NA	F	NA	NA	NA	NA	NA	NA	NA	NA	NA	NA	NA	NA	NA	NA	NA	NA	NA	NA	NA
ATCCGCGCCGTCGTCGAGCTATTGCAGCAGC	30	TGGCGTTGGCAAGCTGCTGCAATAGCTCGACGACGGCGCGGATCGGCTTGGCGACGCCGT	60	0.00268720918510221	49.448696	1.083333	-5.512384	F	NA	NA	NA	NA	NA	NA	NA	NA	NA	NA	NA	NA	NA	NA	NA	NA	NA	NA	F	NA	NA	NA	NA	NA	NA	NA	NA	NA	NA	NA	NA	NA	NA	NA	NA	NA	NA	NA
CTTTCCATTCCATTACTAATGATTCCATTCC	6	TGGAATGGAATCATTAGTAATGGAATGGAAAGGAAT	36	0.0428715316725979	102.995217	1.889333	-5.768557	T	16315	chrY	11689351	11689386	NA	36M	0	0	0	3	0	0	F	F	1	0.916666666666667	1	3	F	NA	NA	NA	NA	NA	NA	NA	NA	NA	ENSG00000271375	-	AC134879.2	215115	ENSG00000234385	-	RCC2P1	91665	NA	NA
CAGGGAGTTATCGGGGTAGAGGGTCGGCTGG	5	GGCCAGCCGACCCTCTACCCCGATAACTCCCTGAG	35	0.0468164926818921	100.296957	1	-6.648134	F	NA	NA	NA	NA	NA	NA	NA	NA	NA	NA	NA	NA	NA	NA	NA	NA	NA	NA	F	NA	NA	NA	NA	NA	NA	NA	NA	NA	NA	NA	NA	NA	NA	NA	NA	NA	NA	NA
AATCGAATGGAATCATCATCAAATGGATTCA	2	AATCGAATGGAATCATCATCAAATGGATTCAA	32	0.0359441767193798	210.346957	1.674333	-6.973041	T	1381	chr16	34079884	34079915	NA	32M	0	0	0	1	0	0	F	F	1	0.96875	1	1	F	NA	NA	NA	NA	NA	NA	NA	NA	NA	ENSG00000261197	+	AC133561.3	28522	ENSG00000262561	+	AC136932.1	40554	NA	NA
CCGGCGATGGCTGCCGTCGTCGAGCTGGCCC	12	CCGGGCCAGCTCGACGACGGCAGCCATCGCCGGGGCGGCCAG	42	0.0281419556708229	42.813478	1.178333	-5.183246	F	NA	NA	NA	NA	NA	NA	NA	NA	NA	NA	NA	NA	NA	NA	NA	NA	NA	NA	F	NA	NA	NA	NA	NA	NA	NA	NA	NA	NA	NA	NA	NA	NA	NA	NA	NA	NA	NA
ATGATGATCTCGACCTTCCAGATCGGCGCCG	8	GCGGCGCCGATCTGGAAGGTCGAGATCATCATGCCCGAT	39	0.034542282969178	1	8.237667	3.042236	F	NA	NA	NA	NA	NA	NA	NA	NA	NA	NA	NA	NA	NA	NA	NA	NA	NA	NA	F	NA	NA	NA	NA	NA	NA	NA	NA	NA	NA	NA	NA	NA	NA	NA	NA	NA	NA	NA
CGGCGCGCCGTCGACAACAGGCTCGAGCAAG	25	GAGCGCGTCGTCCCACGTGGCCGGCGCGCCGTCGACAACAGGCTCGAGCAAGCGG	55	0.0427698107355557	71.48913	2.473333	-4.853195	F	NA	NA	NA	NA	NA	NA	NA	NA	NA	NA	NA	NA	NA	NA	NA	NA	NA	NA	F	NA	NA	NA	NA	NA	NA	NA	NA	NA	NA	NA	NA	NA	NA	NA	NA	NA	NA	NA
CATTACAAGGCGCGTATCGGATATCGAACAA	8	CATTACAAGGCGCGTATCGGATATCGAACAACGACTGG	38	0.0327197071459083	66.35913	1	-6.052223	F	NA	NA	NA	NA	NA	NA	NA	NA	NA	NA	NA	NA	NA	NA	NA	NA	NA	NA	F	NA	NA	NA	NA	NA	NA	NA	NA	NA	NA	NA	NA	NA	NA	NA	NA	NA	NA	NA
ACGGCCGTCGCGCTCCAGCGACGACACAACC	17	GGAACACCGGACGGCCGTCGCGCTCCAGCGACGACACAACCTCGACG	47	0.048226628723251	17.623043	1	-4.139391	F	NA	NA	NA	NA	NA	NA	NA	NA	NA	NA	NA	NA	NA	NA	NA	NA	NA	NA	F	NA	NA	NA	NA	NA	NA	NA	NA	NA	NA	NA	NA	NA	NA	NA	NA	NA	NA	NA
ATGGTGCTGGTCGGCGGCGCGACGCGGCTGA	11	GGTCAGCCGCGTCGCGCCGCCGACCAGCACCATCAGCGCGATCAGGCCGGCGACCG	56	0.0112964541381904	43.654348	1.097333	-5.314052	F	NA	NA	NA	NA	NA	NA	NA	NA	NA	NA	NA	NA	NA	NA	NA	NA	NA	NA	F	NA	NA	NA	NA	NA	NA	NA	NA	NA	NA	NA	NA	NA	NA	NA	NA	NA	NA	NA
CCCGATGGCGCCCGACTGGGTCGGGTCCTCC	5	CCCGATGGCGCCCGACTGGGTCGGGTCCTCCGGGT	35	0.0404801937012424	37.001739	2.549667	-3.859212	F	NA	NA	NA	NA	NA	NA	NA	NA	NA	NA	NA	NA	NA	NA	NA	NA	NA	NA	F	NA	NA	NA	NA	NA	NA	NA	NA	NA	NA	NA	NA	NA	NA	NA	NA	NA	NA	NA
GATGATAGTTTTAATTACAGATTGCGACTGC	5	GCAGTCGCAATCTGTAATTAAAACTATCATCAGCT	35	0.0276925886702543	1	8.123667	3.022131	T	17151	chr1	106561617	106561635	NA	10S19M6S	0	0	0	0	6	10	T	T	0.542857142857143	1	2	0	F	NA	NA	NA	NA	NA	NA	NA	NA	NA	ENSG00000270342	-	AL499605.1	16874	ENSG00000270976	+	AL596327.1	218587	NA	NA
CCCTGGGCCTGATCGGGCACGGTGATGGCGA	1	CCCTGGGCCTGATCGGGCACGGTGATGGCGA	31	0.0492793886003519	1	5.343333	2.41774	T	10831	chr2	3245357	3245373	NA	17M14S	0	0	0	2	14	0	T	F	0.548387096774194	0.882352941176471	1	2	F	NA	ENSG00000032389	EIPR1	-	protein_coding	NA	NA	NA	NA	NA	NA	NA	NA	NA	NA	NA	NA	F	T
ACTCCCTGAATTGTGATCATGTTGAAGATGA	24	CACCCTCGACGTCTCCAAGATCATCTTCAACATGATCACAATTCAGGGAGTGAC	54	0.0390487647592898	30.165217	1	-4.914814	F	NA	NA	NA	NA	NA	NA	NA	NA	NA	NA	NA	NA	NA	NA	NA	NA	NA	NA	F	NA	NA	NA	NA	NA	NA	NA	NA	NA	NA	NA	NA	NA	NA	NA	NA	NA	NA	NA
CACGGTGAACGGCCGCGCCAACATCACCCAG	16	AGCAATCCCTGCTGGGTGATGTTGGCGCGGCCGTTCACCGTGACGC	46	0.0141618560961085	1.633478	12.257	2.907587	F	NA	NA	NA	NA	NA	NA	NA	NA	NA	NA	NA	NA	NA	NA	NA	NA	NA	NA	F	NA	NA	NA	NA	NA	NA	NA	NA	NA	NA	NA	NA	NA	NA	NA	NA	NA	NA	NA
GGAAAGGGGCGGGGTGGGGAAAAGGGGGGCC	2	GGAAAGGGGCGGGGTGGGGAAAAGGGGGGCCC	32	0.0494487325059577	1	71.661667	6.16313	T	18663	chr13	98172130	98172146	NA	6S17M9S	0	0	0	0	9	6	T	T	0.53125	1	1	0	F	NA	ENSG00000152767	FARP1	+	protein_coding	NA	NA	NA	NA	NA	NA	NA	NA	NA	NA	NA	NA	F	T
ATCGCCTTTCCCTCACGGTACTGGTTCACTA	1	ATCGCCTTTCCCTCACGGTACTGGTTCACTA	31	0.0294697233152595	6.886957	1.026	-2.746836	T	7158	chr21	10524374	10524393	NA	4S20M7S	0	0	0	1	7	4	T	T	0.645161290322581	0.95	1	1	F	NA	ENSG00000274391	TPTE	+	protein_coding	NA	NA	NA	NA	NA	NA	NA	NA	NA	NA	NA	NA	F	T
CATCATCGACCATGCGCACAAGAACCTCAAC	5	CATCATCGACCATGCGCACAAGAACCTCAACGAGC	35	0.0477609722625605	22.609565	1.083333	-4.383385	F	NA	NA	NA	NA	NA	NA	NA	NA	NA	NA	NA	NA	NA	NA	NA	NA	NA	NA	F	NA	NA	NA	NA	NA	NA	NA	NA	NA	NA	NA	NA	NA	NA	NA	NA	NA	NA	NA
ATCGCGCAACGCCTGACGCTGCGCCGAGCGC	2	ATCGCGCAACGCCTGACGCTGCGCCGAGCGCA	32	0.0290772339076602	1	6.295667	2.654359	F	NA	NA	NA	NA	NA	NA	NA	NA	NA	NA	NA	NA	NA	NA	NA	NA	NA	NA	F	NA	NA	NA	NA	NA	NA	NA	NA	NA	NA	NA	NA	NA	NA	NA	NA	NA	NA	NA
ATCCTGACCGTGAACCGGGAGACCGTGCAGG	11	GCGGTCAGGGCCTGCACGGTCTCCCGGTTCACGGTCAGGAT	41	0.0335694674499797	2.51087	11.047	2.137395	F	NA	NA	NA	NA	NA	NA	NA	NA	NA	NA	NA	NA	NA	NA	NA	NA	NA	NA	F	NA	NA	NA	NA	NA	NA	NA	NA	NA	NA	NA	NA	NA	NA	NA	NA	NA	NA	NA
CCCGAATAGAATGGAATGTAATGGAATGGAA	1	CCCGAATAGAATGGAATGTAATGGAATGGAA	31	0.0443956692666012	96.992609	1	-6.599803	T	10662	chr17	21942510	21942540	NA	31M	0	0	0	3	0	0	F	F	1	0.903225806451613	2	3	F	NA	NA	NA	NA	NA	NA	NA	NA	NA	ENSG00000283566	-	AC243725.1	159046	ENSG00000265233	-	ABBA01006766.1	114046	NA	NA
CCTGTTCGGGATCGTCACGAGAGTGACATGA	23	CCTGTTCGGGATCGTCACGAGAGTGACATGATTGCGCTAAGCGAGGCACCCTGCAAGGGGCCATTCGCAATG	72	0.0179398805778491	26.526522	4.165333	-2.670932	F	NA	NA	NA	NA	NA	NA	NA	NA	NA	NA	NA	NA	NA	NA	NA	NA	NA	NA	F	NA	NA	NA	NA	NA	NA	NA	NA	NA	NA	NA	NA	NA	NA	NA	NA	NA	NA	NA
AGCGCAGCCGCGTGATCGCATAAGCAGACAG	25	TCCATCGTCGCCAGCGTGCTGTCTGCTTATGCGATCACGCGGCTGCGCTTCAAGG	55	0.0407691671286161	14.77913	1.252667	-3.560486	F	NA	NA	NA	NA	NA	NA	NA	NA	NA	NA	NA	NA	NA	NA	NA	NA	NA	NA	F	NA	NA	NA	NA	NA	NA	NA	NA	NA	NA	NA	NA	NA	NA	NA	NA	NA	NA	NA
ACGTCGAAGTTCCGATCGATGCGGTTCTGTA	2	ACGTCGAAGTTCCGATCGATGCGGTTCTGTAA	32	0.0424238637435241	1.04087	9.113	3.130136	F	NA	NA	NA	NA	NA	NA	NA	NA	NA	NA	NA	NA	NA	NA	NA	NA	NA	NA	F	NA	NA	NA	NA	NA	NA	NA	NA	NA	NA	NA	NA	NA	NA	NA	NA	NA	NA	NA
GCGCGGGTGGTCTCGGCGCTGGCTTCCTCGA	1	GCGCGGGTGGTCTCGGCGCTGGCTTCCTCGA	31	0.049970514465476	1	5.980333	2.580226	T	18153	chr1	12058061	12058077	NA	17M14S	0	0	0	1	14	0	T	F	0.548387096774194	0.941176470588235	1	1	F	NA	NA	NA	NA	NA	NA	NA	NA	NA	ENSG00000243539	-	RN7SL649P	21048	ENSG00000120949	+	TNFRSF8	5225	NA	NA
AATACAGGCCTTCATTGAAGCCCTGGCCGCG	1	AATACAGGCCTTCATTGAAGCCCTGGCCGCG	31	0.0494950006954425	44.12087	1.605333	-4.780517	T	1290	chr3	42309782	42309803	NA	4S22M5S	0	0	0	0	5	4	T	T	0.709677419354839	1	1	0	F	NA	NA	NA	NA	NA	NA	NA	NA	NA	ENSG00000281160	+	AC018358.1	43393	ENSG00000231280	+	SALL4P6	11201	NA	NA
CCTCGCGCGGCTCGCGAAGTTGTACCCGCAG	8	CGGACTGCTGCGGGTACAACTTCGCGAGCCGCGCGAGGAGA	41	0.0333200038866582	1	8.881333	3.150776	F	NA	NA	NA	NA	NA	NA	NA	NA	NA	NA	NA	NA	NA	NA	NA	NA	NA	NA	F	NA	NA	NA	NA	NA	NA	NA	NA	NA	NA	NA	NA	NA	NA	NA	NA	NA	NA	NA
GTAAAATAGAGACCCAGTAAAATTGTAATGA	13	GGTAAAATAGAGACCCAGTAAAATTGTAATGAGCAGTGCTTGA	43	0.0406791400280525	86.263478	2.942333	-4.873717	T	19411	chr1	634855	634897	NA	43M	0	0	0	1	0	0	F	F	1	0.976744186046512	1	1	F	NA	ENSG00000198744	MTCO3P12	+	unprocessed_pseudogene	NA	NA	NA	NA	NA	NA	NA	NA	NA	NA	NA	NA	T	F
CTTCGTCCTGTCCGGTCTGCTGCTCAACATC	5	GTGATGTTGAGCAGCAGACCGGACAGGACGAAGAG	35	0.0320290443704494	4.019565	9.672667	1.266874	F	NA	NA	NA	NA	NA	NA	NA	NA	NA	NA	NA	NA	NA	NA	NA	NA	NA	NA	F	NA	NA	NA	NA	NA	NA	NA	NA	NA	NA	NA	NA	NA	NA	NA	NA	NA	NA	NA
ATGCAAAGGAATGGAGTGGAATGGAATGGAA	15	AATGCAAAGGAATGGAGTGGAATGGAATGGAATGGAATCTACCCGAGTACAGGG	54	0.00833102380626	62.644348	1	-5.969112	T	7719	chr10	41896152	41896200	NA	49M5S	0	0	0	3	5	0	T	F	0.907407407407407	0.938775510204082	1	3	F	NA	NA	NA	NA	NA	NA	NA	NA	NA	ENSG00000233832	+	AL590623.1	3113045	ENSG00000229485	-	KSR1P1	253109	NA	NA
CCTTCAAGCCCCCAAAGCCGGAATTCCGGGA	8	CACTACGTTCCCGGAATTCCGGCTTTGGGGGCTTGAAGGGC	41	0.0494152044138999	133.785652	1	-7.06378	F	NA	NA	NA	NA	NA	NA	NA	NA	NA	NA	NA	NA	NA	NA	NA	NA	NA	NA	F	NA	NA	NA	NA	NA	NA	NA	NA	NA	NA	NA	NA	NA	NA	NA	NA	NA	NA	NA
GCAACGAGCGCAACCCTTGTCATTAGTTGCC	1	GCAACGAGCGCAACCCTTGTCATTAGTTGCC	31	0.0330967648450143	14.756957	4.983	-1.566309	T	17263	chr14	21902388	21902404	NA	14S17M	0	0	0	1	0	14	F	T	0.548387096774194	0.941176470588235	1	1	F	NA	NA	NA	NA	NA	NA	NA	NA	NA	ENSG00000211790	+	TRAV8-4	7359	ENSG00000256379	+	TRAV8-5	672	NA	NA
CTTGGCCTGCCGTACCCGGGTGGGCCGGTCA	3	TGTCGATGACCGGCCCACCCGGGTACGGCAGGCCAAG	37	0.02165336118832	62.534783	1.265	-5.62745	F	NA	NA	NA	NA	NA	NA	NA	NA	NA	NA	NA	NA	NA	NA	NA	NA	NA	NA	F	NA	NA	NA	NA	NA	NA	NA	NA	NA	NA	NA	NA	NA	NA	NA	NA	NA	NA	NA
CCGAGCGGCAGGGCCTGCGCGACGTCGAGCG	22	GCACGATGGGCACCGACCTCGCGCTCGACGTCGCGCAGGCCCTGCCGCTCGG	52	0.0263429658098328	24.249565	1.887333	-3.683538	F	NA	NA	NA	NA	NA	NA	NA	NA	NA	NA	NA	NA	NA	NA	NA	NA	NA	NA	F	NA	NA	NA	NA	NA	NA	NA	NA	NA	NA	NA	NA	NA	NA	NA	NA	NA	NA	NA
CCTCGCGTTGTGCGCGTCTTGTAAGGTTCAC	37	GTGAACCTTACAAGACGCGCACAACGCGAGGGGGATCATATGACGGCGACTAAAGCTTCAGTTCTTG	67	0.0337754988555662	54.562609	1	-5.769841	F	NA	NA	NA	NA	NA	NA	NA	NA	NA	NA	NA	NA	NA	NA	NA	NA	NA	NA	F	NA	NA	NA	NA	NA	NA	NA	NA	NA	NA	NA	NA	NA	NA	NA	NA	NA	NA	NA
CATGTAGCCGACCAGGATGCCGTCCTCGATC	5	CCTGCATGTAGCCGACCAGGATGCCGTCCTCGATC	35	0.0392067049453603	1	5.958667	2.57499	T	9799	chr4	2291185	2291202	NA	4S18M13S	0	0	0	0	13	4	T	T	0.514285714285714	1	1	0	F	NA	ENSG00000159733	ZFYVE28	-	protein_coding	NA	NA	NA	NA	NA	NA	NA	NA	NA	NA	NA	NA	F	T
CGGCGCCTTGATCTGCGGCAGCAGGTTGACG	32	GATCCGCGGCGTGCTGTACCGAAAGAGCGCCGTCAACCTGCTGCCGCAGATCAAGGCGCCGA	62	0.00853017823014356	19.706087	1	-4.300569	F	NA	NA	NA	NA	NA	NA	NA	NA	NA	NA	NA	NA	NA	NA	NA	NA	NA	NA	F	NA	NA	NA	NA	NA	NA	NA	NA	NA	NA	NA	NA	NA	NA	NA	NA	NA	NA	NA
GCGAAGTAGTCGTTCCGGTGCCCGCGCCCCC	53	GGGCGAAGTAGTCGTTCCGGTGCCCGCGCCCCCGGCGGCGCGGGCACGCCGCAATTGCCGATCCCCATTTCCCCGCGTCGTCCCGCCGTTCGGC	94	0.021046837619511	47.968261	1.267333	-5.242213	F	NA	NA	NA	NA	NA	NA	NA	NA	NA	NA	NA	NA	NA	NA	NA	NA	NA	NA	F	NA	NA	NA	NA	NA	NA	NA	NA	NA	NA	NA	NA	NA	NA	NA	NA	NA	NA	NA
CCTGCCGCATTCCGCCGCGGAACTGCGCTTC	7	GGATGAAGCGCAGTTCCGCGGCGGAATGCGGCAGGCG	37	0.0429179233153859	1.07913	6.464	2.582559	F	NA	NA	NA	NA	NA	NA	NA	NA	NA	NA	NA	NA	NA	NA	NA	NA	NA	NA	F	NA	NA	NA	NA	NA	NA	NA	NA	NA	NA	NA	NA	NA	NA	NA	NA	NA	NA	NA
ACGGCATACCAGTCGGCGAGCCCGCCGATGG	9	CGCGACGACGGCATACCAGTCGGCGAGCCCGCCGATGGT	39	0.0324611987497759	1	9.574667	3.259222	F	NA	NA	NA	NA	NA	NA	NA	NA	NA	NA	NA	NA	NA	NA	NA	NA	NA	NA	F	NA	NA	NA	NA	NA	NA	NA	NA	NA	NA	NA	NA	NA	NA	NA	NA	NA	NA	NA
GTATAAAATATATATTTGGGGTACTTTCGTA	8	CAGTATAAAATATATATTTGGGGTACTTTCGTATTTAA	38	0.0488394299705631	242.72	1.273333	-7.574539	T	19477	chrX	139921870	139921891	NA	16S22M	0	0	0	2	0	16	F	T	0.578947368421053	0.909090909090909	1	2	F	NA	ENSG00000101974	ATP11C	-	protein_coding	NA	NA	NA	NA	NA	NA	NA	NA	NA	NA	NA	NA	F	T
CGGCCGAGCGACTCGACGCCGCCGCTGCTGC	38	TTCGGATCGCAGCAGCGGCGGCGTCGAGTCGCTCGGCCGATCGTCCGACCAGGTGCACCCGCGCTCCG	68	0.0429894820515766	27.559565	1	-4.784481	F	NA	NA	NA	NA	NA	NA	NA	NA	NA	NA	NA	NA	NA	NA	NA	NA	NA	NA	F	NA	NA	NA	NA	NA	NA	NA	NA	NA	NA	NA	NA	NA	NA	NA	NA	NA	NA	NA
AAAGGGGCGGGGTGGGGAAAAGGGGAGGGAA	5	TTTCCCTCCCCTTTTCCCCACCCCGCCCCTTTCCC	35	0.0410397114487847	221.78087	1	-7.792991	T	378	chr14	25359313	25359332	NA	4S20M11S	0	0	0	0	11	4	T	T	0.571428571428571	1	3	0	F	NA	NA	NA	NA	NA	NA	NA	NA	NA	ENSG00000258275	+	OR7K1P	625	ENSG00000257976	-	AL079352.1	71860	NA	NA
CACTTAGATGCTTTCAGCGGTTATCCACTCC	5	GGAGTGGATAACCGCTGAAAGCATCTAAGTGGGAA	35	0.00542301441085052	19.902174	1.062333	-4.227618	T	9030	GL383568.1	83373	83390	NA	17S18M	0	0	0	1	0	17	F	T	0.514285714285714	0.944444444444444	1	1	F	NA	NA	NA	NA	NA	NA	NA	NA	NA	NA	NA	NA	NA	NA	NA	NA	NA	NA	NA
CAGCAGTTGGAGAACCAGATCCATGGCAGGC	11	CGAGCGCCTGCCATGGATCTGGTTCTCCAACTGCTGTTCAC	41	0.0387819960967519	27.426522	3.071	-3.158791	F	NA	NA	NA	NA	NA	NA	NA	NA	NA	NA	NA	NA	NA	NA	NA	NA	NA	NA	F	NA	NA	NA	NA	NA	NA	NA	NA	NA	NA	NA	NA	NA	NA	NA	NA	NA	NA	NA
CGAAACCGGCCTCGATGAAGATCTTGTCGAG	8	GGCTCGACAAGATCTTCATCGAGGCCGGTTTCGAATGG	38	0.0437834271787764	1	4.744	2.246104	F	NA	NA	NA	NA	NA	NA	NA	NA	NA	NA	NA	NA	NA	NA	NA	NA	NA	NA	F	NA	NA	NA	NA	NA	NA	NA	NA	NA	NA	NA	NA	NA	NA	NA	NA	NA	NA	NA
GCCAGGATGAACACGACCGCGAGCGAGACGA	1	GCCAGGATGAACACGACCGCGAGCGAGACGA	31	0.0259859232736573	1.038261	7.338333	2.821283	T	17563	chr2	219181612	219181628	NA	14S17M	0	0	0	1	0	14	F	T	0.548387096774194	0.941176470588235	1	1	F	NA	ENSG00000144567	RETREG2	+	protein_coding	NA	NA	NA	NA	NA	NA	NA	NA	NA	NA	NA	NA	F	T
AGTGCGTCCGATGAGATTCTCGACGTCAGGC	4	GGAGTGCGTCCGATGAGATTCTCGACGTCAGGCA	34	0.0242493937947494	82.604348	1.083	-6.253113	F	NA	NA	NA	NA	NA	NA	NA	NA	NA	NA	NA	NA	NA	NA	NA	NA	NA	NA	F	NA	NA	NA	NA	NA	NA	NA	NA	NA	NA	NA	NA	NA	NA	NA	NA	NA	NA	NA
CAAACAGGAGAAGAAGAAGAAGAAGACAGGC	1	CAAACAGGAGAAGAAGAAGAAGAAGACAGGC	31	0.0316685091967969	1	6.121	2.613767	T	8494	chr11	65120773	65120801	NA	2S29M	0	0	0	0	0	2	F	T	0.935483870967742	1	1	0	F	NA	ENSG00000149806	FAU	-	protein_coding	NA	NA	NA	NA	NA	NA	NA	NA	NA	NA	NA	NA	T	F
CCGACCTGCTTAGAGGCACCGCGGATCGCCA	11	CCGACCTGCTTAGAGGCACCGCGGATCGCCACGCCGAGGCC	41	0.0418742235960742	15.074783	1	-3.914065	F	NA	NA	NA	NA	NA	NA	NA	NA	NA	NA	NA	NA	NA	NA	NA	NA	NA	NA	F	NA	NA	NA	NA	NA	NA	NA	NA	NA	NA	NA	NA	NA	NA	NA	NA	NA	NA	NA
CGCCCTCATCGCTGTTGGCACCGTAACGAGC	60	TGGCAGGCTCATAAGGTCACCGGCCATGCCTCCTGGAGACGTTTAGGGGCAATCCTCGCCCTCATCGCTGTTGGCACCGTAACGAGCCTCATCCCTGCCAT	101	0.0203838112821823	52.222174	1	-5.706591	F	NA	NA	NA	NA	NA	NA	NA	NA	NA	NA	NA	NA	NA	NA	NA	NA	NA	NA	F	NA	NA	NA	NA	NA	NA	NA	NA	NA	NA	NA	NA	NA	NA	NA	NA	NA	NA	NA
AGCCCGCGTTTTGGGCGCAGCTCCCCGGCAA	3	GAGCCCGCGTTTTGGGCGCAGCTCCCCGGCAAT	33	0.0366109095308541	40.470435	4.041667	-3.323846	T	4724	chr1	105120001	105120017	NA	8S17M8S	0	0	0	0	8	8	T	T	0.515151515151515	1	1	0	F	NA	NA	NA	NA	NA	NA	NA	NA	NA	ENSG00000285981	-	AL591888.1	87637	ENSG00000225036	+	CDK4P1	313976	NA	NA
ACGTCGTATGTCACGACCTTGTCGACCTGCA	4	CCGACGTCGTATGTCACGACCTTGTCGACCTGCA	34	0.0292669536340852	57.707826	1.298333	-5.474035	F	NA	NA	NA	NA	NA	NA	NA	NA	NA	NA	NA	NA	NA	NA	NA	NA	NA	NA	F	NA	NA	NA	NA	NA	NA	NA	NA	NA	NA	NA	NA	NA	NA	NA	NA	NA	NA	NA
CCATTGGCGCGGTCACGTTCGCGCTGCAACA	29	ACATGCCGAGCGGCGAACCGCGGTAACCGGAGATGAAACCCGCGGTGTTCAGCCCATTGGCGCGGTCACGTTCGCGCTGCAACATGG	87	0.0299116773145065	41.283913	7.474	-2.465627	F	NA	NA	NA	NA	NA	NA	NA	NA	NA	NA	NA	NA	NA	NA	NA	NA	NA	NA	F	NA	NA	NA	NA	NA	NA	NA	NA	NA	NA	NA	NA	NA	NA	NA	NA	NA	NA	NA
GCAAGGTGGTACCACTCCTTCCCATCCCGAA	1	GCAAGGTGGTACCACTCCTTCCCATCCCGAA	31	0.011814778886223	5.547826	20.250667	1.867975	T	17284	chr1	46458132	46458152	NA	10S21M	0	0	0	2	0	10	F	T	0.67741935483871	0.904761904761905	1	2	F	NA	ENSG00000232022	FAAHP1	+	transcribed_unprocessed_pseudogene	NA	NA	NA	NA	NA	NA	NA	NA	NA	NA	NA	NA	F	T
CCTGCCGCGGCTCGCGGGGCATTTCCTCAAG	12	GCTTGAGGAAATGCCCCGCGAGCCGCGGCAGGTAGCCGTTGG	42	0.0420139479794152	33.954783	1	-5.085543	F	NA	NA	NA	NA	NA	NA	NA	NA	NA	NA	NA	NA	NA	NA	NA	NA	NA	NA	F	NA	NA	NA	NA	NA	NA	NA	NA	NA	NA	NA	NA	NA	NA	NA	NA	NA	NA	NA
CGATCGACCAGTTCCGCGACGCGATCCAGCC	7	CGATCGACCAGTTCCGCGACGCGATCCAGCCCACTGC	37	0.0369915786585943	1.143478	7.620667	2.736489	F	NA	NA	NA	NA	NA	NA	NA	NA	NA	NA	NA	NA	NA	NA	NA	NA	NA	NA	F	NA	NA	NA	NA	NA	NA	NA	NA	NA	NA	NA	NA	NA	NA	NA	NA	NA	NA	NA
CCGTTGACGAAGGATCTGCGTCACGACCTCG	12	GCCGTTGACGAAGGATCTGCGTCACGACCTCGACGCGATGTC	42	0.0422381099714142	95.803043	1.174	-6.350567	F	NA	NA	NA	NA	NA	NA	NA	NA	NA	NA	NA	NA	NA	NA	NA	NA	NA	NA	F	NA	NA	NA	NA	NA	NA	NA	NA	NA	NA	NA	NA	NA	NA	NA	NA	NA	NA	NA
CGGCGCACGACCAAACAGCGCCTTGCCATTC	6	ACGAATGGCAAGGCGCTGTTTGGTCGTGCGCCGCCG	36	0.0434022874876197	84.9	1.174	-6.17626	F	NA	NA	NA	NA	NA	NA	NA	NA	NA	NA	NA	NA	NA	NA	NA	NA	NA	NA	F	NA	NA	NA	NA	NA	NA	NA	NA	NA	NA	NA	NA	NA	NA	NA	NA	NA	NA	NA
AGTTCGACATGGAGTCGCTCGACCTCTCCGG	84	CATCAACGACATCCTGGACATGTCGAAGATCGAGGCCGGCCGCATGAAGTTCGACATGGAGTCGCTCGACCTCTCCGGCATCCTCGCCGAGTCGCTGCGGGTGGTGTCCGGCCG	114	0	25.31	1.020667	-4.632123	F	NA	NA	NA	NA	NA	NA	NA	NA	NA	NA	NA	NA	NA	NA	NA	NA	NA	NA	F	NA	NA	NA	NA	NA	NA	NA	NA	NA	NA	NA	NA	NA	NA	NA	NA	NA	NA	NA
CTTTGAAAATCCAGTTTCAGGACCAGACCAA	25	CCATTCGTTTGCTTTGAAAATCCAGTTTCAGGACCAGACCAAAATGACAGAGCAC	55	0.0262569062385991	6.458261	1	-2.691146	F	NA	NA	NA	NA	NA	NA	NA	NA	NA	NA	NA	NA	NA	NA	NA	NA	NA	NA	F	NA	NA	NA	NA	NA	NA	NA	NA	NA	NA	NA	NA	NA	NA	NA	NA	NA	NA	NA
ACTGTACATAATATATGAAAGTACATCAAAT	1	ACTGTACATAATATATGAAAGTACATCAAAT	31	0.0483635878148482	231.660435	6.877333	-5.074019	T	3726	KI270466.1	231	254	NA	7S24M	0	0	0	0	0	7	F	T	0.774193548387097	1	2	0	F	NA	NA	NA	NA	NA	NA	NA	NA	NA	NA	NA	NA	NA	NA	NA	NA	NA	NA	NA
CGCCGATGCGCCAGTACATGCACCAGCAACG	2	CGCCGATGCGCCAGTACATGCACCAGCAACGC	32	0.0297250575084175	1.604348	9.435667	2.556137	T	13756	chr6	15191187	15191202	NA	16S16M	0	0	0	0	0	16	F	T	0.5	1	1	0	F	NA	NA	NA	NA	NA	NA	NA	NA	NA	ENSG00000242989	+	RN7SL332P	77967	ENSG00000271888	-	AL136162.1	52720	NA	NA
AAGGTCTGGCCGCCGAGAATGTCGGCCGATG	10	CATCGCGAAGGTCTGGCCGCCGAGAATGTCGGCCGATGCG	40	0.0328909478515874	36.583043	1	-5.193103	F	NA	NA	NA	NA	NA	NA	NA	NA	NA	NA	NA	NA	NA	NA	NA	NA	NA	NA	F	NA	NA	NA	NA	NA	NA	NA	NA	NA	NA	NA	NA	NA	NA	NA	NA	NA	NA	NA
CCTGGGGCGTGACCGCGGCCTACAAGGGCGA	30	CGGAAAAGAAGGTCTGGCTGTCGCCCTTGTAGGCCGCGGTCACGCCCCAGGGCATGTACATCAGCGCGAGCGTGAC	76	0.0441247021731663	24.781739	1	-4.631206	F	NA	NA	NA	NA	NA	NA	NA	NA	NA	NA	NA	NA	NA	NA	NA	NA	NA	NA	F	NA	NA	NA	NA	NA	NA	NA	NA	NA	NA	NA	NA	NA	NA	NA	NA	NA	NA	NA
CGCGAGGCCCGAGCGTGCGCGCGAGACGCCA	4	ATCGCGAGGCCCGAGCGTGCGCGCGAGACGCCAT	34	0.0380747049781461	1	6.318333	2.659544	T	13951	chr22	46070980	46070997	NA	7S18M9S	0	0	0	0	9	7	T	T	0.529411764705882	1	1	0	F	NA	ENSG00000197182	MIRLET7BHG	+	lncRNA	NA	NA	NA	NA	NA	NA	NA	NA	NA	NA	NA	NA	F	T
CTGCCGAAGCGCGGCACGGTGATCGAGGTGA	6	ATCATCTGCCGAAGCGCGGCACGGTGATCGAGGTGA	36	0.0490549790985977	1	8.537667	3.093842	F	NA	NA	NA	NA	NA	NA	NA	NA	NA	NA	NA	NA	NA	NA	NA	NA	NA	NA	F	NA	NA	NA	NA	NA	NA	NA	NA	NA	NA	NA	NA	NA	NA	NA	NA	NA	NA	NA
AGCCACTTCGAGTTTCGACATTTGAGCGTAT	49	GAGGTTGCATGCATGTTCACTATAAACCAAGGGAGATACGCTCAAATGTCGAAACTCGAAGTGGCTATGTTTGGTCACGC	80	0	19.405217	1.553333	-3.643006	F	NA	NA	NA	NA	NA	NA	NA	NA	NA	NA	NA	NA	NA	NA	NA	NA	NA	NA	F	NA	NA	NA	NA	NA	NA	NA	NA	NA	NA	NA	NA	NA	NA	NA	NA	NA	NA	NA
CCGCTCTTGCCCTATGCCTTGCAACGGCACC	2	ACCGCTCTTGCCCTATGCCTTGCAACGGCACC	32	0.0361858774909559	1	13.730333	3.779295	T	11255	chr8	23119596	23119611	NA	16M16S	0	0	0	1	16	0	T	F	0.5	0.9375	1	1	F	NA	NA	NA	NA	NA	NA	NA	NA	NA	ENSG00000173535	+	TNFRSF10C	2160	ENSG00000173530	-	TNFRSF10D	15976	NA	NA
AGAGTGTAGGATAGGGTGTAGATGTCGGGGG	3	AAAGAGTGTAGGATAGGGTGTAGATGTCGGGGG	33	0.0475308690407647	31.599565	1.186667	-4.734918	T	4273	chr6	120054394	120054410	NA	17M16S	0	0	0	0	16	0	T	F	0.515151515151515	1	1	0	F	NA	NA	NA	NA	NA	NA	NA	NA	NA	ENSG00000265725	+	MIR3144	39138	ENSG00000286540	+	AL096854.1	408100	NA	NA
AGCATATCGCCGCCAAGTACAGCGTCCCGCG	16	AGCATATCGCCGCCAAGTACAGCGTCCCGCGTGACCGCAACCGTCA	46	0.0214484867779204	1.079565	7.762333	2.84604	F	NA	NA	NA	NA	NA	NA	NA	NA	NA	NA	NA	NA	NA	NA	NA	NA	NA	NA	F	NA	NA	NA	NA	NA	NA	NA	NA	NA	NA	NA	NA	NA	NA	NA	NA	NA	NA	NA
CGTGACCTCGATTGCAGTGAAGCGTCTTACC	8	AGCAGCCGGTAAGACGCTTCACTGCAATCGAGGTCACG	38	0.0327839317021438	7.404348	1	-2.888373	F	NA	NA	NA	NA	NA	NA	NA	NA	NA	NA	NA	NA	NA	NA	NA	NA	NA	NA	F	NA	NA	NA	NA	NA	NA	NA	NA	NA	NA	NA	NA	NA	NA	NA	NA	NA	NA	NA
AGAGCACTAGTTCGGTGCGGGCGGAGAAAAT	1	AGAGCACTAGTTCGGTGCGGGCGGAGAAAAT	31	0.0350946932248382	1	8.815667	3.14007	F	NA	NA	NA	NA	NA	NA	NA	NA	NA	NA	NA	NA	NA	NA	NA	NA	NA	NA	F	NA	NA	NA	NA	NA	NA	NA	NA	NA	NA	NA	NA	NA	NA	NA	NA	NA	NA	NA
CGAGGGTTGACATCGAGGCTTGCGGTCGATC	40	TGGGCCGGTTGCTCTGATCGACCGCAAGCCTCGATGTCAACCCTCGAGGCTCAATGATGTGCAACACCAG	70	0.0240312475763874	24.549565	2.394	-3.358202	F	NA	NA	NA	NA	NA	NA	NA	NA	NA	NA	NA	NA	NA	NA	NA	NA	NA	NA	F	NA	NA	NA	NA	NA	NA	NA	NA	NA	NA	NA	NA	NA	NA	NA	NA	NA	NA	NA
GTTGTGATCGTAGTAGGTGCCCGGAGGCATA	5	ACGTTGTGATCGTAGTAGGTGCCCGGAGGCATAAA	35	0.0233147147704753	5.773043	1	-2.529332	F	NA	NA	NA	NA	NA	NA	NA	NA	NA	NA	NA	NA	NA	NA	NA	NA	NA	NA	F	NA	NA	NA	NA	NA	NA	NA	NA	NA	NA	NA	NA	NA	NA	NA	NA	NA	NA	NA
ATGCGGGCAAAATTCCCCGACCTCGACCTGG	15	CCGACATGCGGGCAAAATTCCCCGACCTCGACCTGGTCCTGATCG	45	0.0177403001078416	29.213043	1	-4.868541	F	NA	NA	NA	NA	NA	NA	NA	NA	NA	NA	NA	NA	NA	NA	NA	NA	NA	NA	F	NA	NA	NA	NA	NA	NA	NA	NA	NA	NA	NA	NA	NA	NA	NA	NA	NA	NA	NA
CCGGAATGAGGATTAACCTGGCACGACGGAC	21	TGGCGTTGGCAATAACGGGTGTCCGTCGTGCCAGGTTAATCCTCATTCCGG	51	0.0321851203645108	48.719565	1	-5.606429	F	NA	NA	NA	NA	NA	NA	NA	NA	NA	NA	NA	NA	NA	NA	NA	NA	NA	NA	F	NA	NA	NA	NA	NA	NA	NA	NA	NA	NA	NA	NA	NA	NA	NA	NA	NA	NA	NA
CCTCGATCAGATGGTGGGCGTCGCTCTTGCC	16	CCGACAAGATCGGCAAGAGCGACGCCCACCATCTGATCGAGGCCGC	46	0.0441780871979904	1	10.536667	3.397347	F	NA	NA	NA	NA	NA	NA	NA	NA	NA	NA	NA	NA	NA	NA	NA	NA	NA	NA	F	NA	NA	NA	NA	NA	NA	NA	NA	NA	NA	NA	NA	NA	NA	NA	NA	NA	NA	NA
ACCAAGCCTGCGGTGCGGACCTGCTCGCCCA	7	TGGCACCAAGCCTGCGGTGCGGACCTGCTCGCCCAAT	37	0.0475514130675255	50.165217	1	-5.648615	F	NA	NA	NA	NA	NA	NA	NA	NA	NA	NA	NA	NA	NA	NA	NA	NA	NA	NA	F	NA	NA	NA	NA	NA	NA	NA	NA	NA	NA	NA	NA	NA	NA	NA	NA	NA	NA	NA
AGAATAGAATGGAACTGAATGGAATGGAATG	15	CAGAATAGAATGGAACTGAATGGAATGGAATGGAATGGAGTGGACTC	47	0.0388338062908339	243.075217	1	-7.925259	T	3909	chrY	10846739	10846772	NA	13S34M	0	0	0	3	0	13	F	T	0.723404255319149	0.911764705882353	1	3	F	NA	NA	NA	NA	NA	NA	NA	NA	NA	ENSG00000251705	+	RNA5-8SP6	646434	ENSG00000273858	-	AC140113.4	195949	NA	NA
GGCTGACTTTATGTCGACCGTCCTCAACCTA	9	GGCTGGCCGGCTGACTTTATGTCGACCGTCCTCAACCTA	39	0.00877112095756257	1	7.3	2.867896	F	NA	NA	NA	NA	NA	NA	NA	NA	NA	NA	NA	NA	NA	NA	NA	NA	NA	NA	F	NA	NA	NA	NA	NA	NA	NA	NA	NA	NA	NA	NA	NA	NA	NA	NA	NA	NA	NA
GATGAGCTGCGCAGAACACGGACTGTCGAAC	15	AATCCATCGGTTCGACAGTCCGTGTTCTGCGCAGCTCATCTCATT	45	0.0368149240734462	1	7.939	2.988957	F	NA	NA	NA	NA	NA	NA	NA	NA	NA	NA	NA	NA	NA	NA	NA	NA	NA	NA	F	NA	NA	NA	NA	NA	NA	NA	NA	NA	NA	NA	NA	NA	NA	NA	NA	NA	NA	NA
GATCGTTTCCGCCCACGGCTTCATCGCCCGC	8	AGATCGTTTCCGCCCACGGCTTCATCGCCCGCATCCAG	38	0.0482695841463902	1.906522	12.207	2.678694	F	NA	NA	NA	NA	NA	NA	NA	NA	NA	NA	NA	NA	NA	NA	NA	NA	NA	NA	F	NA	NA	NA	NA	NA	NA	NA	NA	NA	NA	NA	NA	NA	NA	NA	NA	NA	NA	NA
ATCCCGGATTTGCGCAGACCGATCGTGATCC	32	CGTCATAAGACACGCACACCACCGGATCACGATCGGTCTGCGCAAATCCGGGATTGCGCCAGTTGAGCCCATGCGG	76	0.0155844666140782	48.852609	3.72	-3.715061	F	NA	NA	NA	NA	NA	NA	NA	NA	NA	NA	NA	NA	NA	NA	NA	NA	NA	NA	F	NA	NA	NA	NA	NA	NA	NA	NA	NA	NA	NA	NA	NA	NA	NA	NA	NA	NA	NA
GCTCGGTGCCAGTGGCGGCGAGGAGATCGCC	28	GGCGGCGGCTTGCTCGGTGCCAGTGGCGGCGAGGAGATCGCCGGGGCGGCGGACTCGCGCGGCATCGCCGACGGG	75	0.0364947000247112	26.832609	2.544	-3.398817	F	NA	NA	NA	NA	NA	NA	NA	NA	NA	NA	NA	NA	NA	NA	NA	NA	NA	NA	F	NA	NA	NA	NA	NA	NA	NA	NA	NA	NA	NA	NA	NA	NA	NA	NA	NA	NA	NA
CGAAGATCTCATCGGGAGTGACCCACTGTCC	8	CTCGGACAGTGGGTCACTCCCGATGAGATCTTCGGGAG	38	0.0326367809724152	69.785217	1	-6.12485	F	NA	NA	NA	NA	NA	NA	NA	NA	NA	NA	NA	NA	NA	NA	NA	NA	NA	NA	F	NA	NA	NA	NA	NA	NA	NA	NA	NA	NA	NA	NA	NA	NA	NA	NA	NA	NA	NA
AAGCCATGCTTGCTTCGCGACCCCATTCCCA	16	TTGATGCAAGCAAGCCATGCTTGCTTCGCGACCCCATTCCCACCGA	46	0.0171611785315097	20.583913	1	-4.363445	F	NA	NA	NA	NA	NA	NA	NA	NA	NA	NA	NA	NA	NA	NA	NA	NA	NA	NA	F	NA	NA	NA	NA	NA	NA	NA	NA	NA	NA	NA	NA	NA	NA	NA	NA	NA	NA	NA
AGCTGATCGTGCCGTTCGGCGGATTGCAGCG	7	CCGGAGCGCTGCAATCCGCCGAACGGCACGATCAGCT	37	0.0409828126833299	20.297391	1	-4.343222	F	NA	NA	NA	NA	NA	NA	NA	NA	NA	NA	NA	NA	NA	NA	NA	NA	NA	NA	F	NA	NA	NA	NA	NA	NA	NA	NA	NA	NA	NA	NA	NA	NA	NA	NA	NA	NA	NA
GACATCTACACCCCAGCCTACACTCTTTCCC	4	GCCGACATCTACACCCCAGCCTACACTCTTTCCC	34	0.0203838112821823	127.715217	1.186667	-6.749871	T	16598	chr16	72569860	72569877	NA	8S18M8S	0	0	0	0	8	8	T	T	0.529411764705882	1	2	0	F	NA	ENSG00000261008	LINC01572	-	lncRNA	NA	NA	NA	NA	NA	NA	NA	NA	NA	NA	NA	NA	F	T
CTGCCGATCGACGCCGTTCCGGACGTGACGA	10	GTCGCTGACTAGGCTGCCGATCGACGCCGTTCCGGACGTGACGAACGTCCAGGT	54	0.0137694389498578	41.49	1.041667	-5.315798	F	NA	NA	NA	NA	NA	NA	NA	NA	NA	NA	NA	NA	NA	NA	NA	NA	NA	NA	F	NA	NA	NA	NA	NA	NA	NA	NA	NA	NA	NA	NA	NA	NA	NA	NA	NA	NA	NA
AACTTGAAGTGCGCAATTTCGGTCGCCAATT	36	CCAACGGCCAGCGTCGGCTGAAGGAATTGGCGACCGAAATTGCGCACTTCAAGTTCATGAAGGCCGC	67	0.00507802902933172	11.112609	1.034667	-3.424959	F	NA	NA	NA	NA	NA	NA	NA	NA	NA	NA	NA	NA	NA	NA	NA	NA	NA	NA	F	NA	NA	NA	NA	NA	NA	NA	NA	NA	NA	NA	NA	NA	NA	NA	NA	NA	NA	NA
AGGGAATTGGGTGTTCCTTGCCCACGAAAGC	49	GGCCGATATAGGTCGTGAAGTAATCATTCGCCTTCGGAATCTGGCTTTCGTGGGCAAGGAACACCCAATTCCCTTCGAA	79	0	61.303913	2.897	-4.403348	F	NA	NA	NA	NA	NA	NA	NA	NA	NA	NA	NA	NA	NA	NA	NA	NA	NA	NA	F	NA	NA	NA	NA	NA	NA	NA	NA	NA	NA	NA	NA	NA	NA	NA	NA	NA	NA	NA
CGGCTGCTGGCACGTAGTTAGCCGGGGCTTA	4	GAATAAGCCCCGGCTAACTACGTGCCAGCAGCCG	34	0.0442259452964023	1.27	18.893	3.894951	F	NA	NA	NA	NA	NA	NA	NA	NA	NA	NA	NA	NA	NA	NA	NA	NA	NA	NA	F	NA	NA	NA	NA	NA	NA	NA	NA	NA	NA	NA	NA	NA	NA	NA	NA	NA	NA	NA
CCGGCGGCAAGATCGACGCCACCGATGCCTC	6	GCGGCGAGGCATCGGTGGCGTCGATCTTGCCGCCGG	36	0.0306864591061424	16.494783	2.437667	-2.758437	F	NA	NA	NA	NA	NA	NA	NA	NA	NA	NA	NA	NA	NA	NA	NA	NA	NA	NA	F	NA	NA	NA	NA	NA	NA	NA	NA	NA	NA	NA	NA	NA	NA	NA	NA	NA	NA	NA
AGCAGCCGGCAGGGTGATTGTCGAGGGTTGG	6	CCGCCAACCCTCGACAATCACCCTGCCGGCTGCTAG	36	0.0326367809724152	18.394783	1.657667	-3.472071	F	NA	NA	NA	NA	NA	NA	NA	NA	NA	NA	NA	NA	NA	NA	NA	NA	NA	NA	F	NA	NA	NA	NA	NA	NA	NA	NA	NA	NA	NA	NA	NA	NA	NA	NA	NA	NA	NA
CAGTTCATCGCCCGCGCCGCGGCGCTGGGAC	7	GCAGTTCATCGCCCGCGCCGCGGCGCTGGGACCCACG	37	0.0483187725700332	17.547826	1	-4.13322	F	NA	NA	NA	NA	NA	NA	NA	NA	NA	NA	NA	NA	NA	NA	NA	NA	NA	NA	F	NA	NA	NA	NA	NA	NA	NA	NA	NA	NA	NA	NA	NA	NA	NA	NA	NA	NA	NA
ACCACGAACTGGGGCGAGGTGAAGCTGCCGC	32	CATCGCTGAGACCACGAACTGGGGCGAGGTGAAGCTGCCGCCGAAGGCCGAACGGGTCCACGGC	64	0.00690094108535708	51.912174	4.697333	-3.466159	F	NA	NA	NA	NA	NA	NA	NA	NA	NA	NA	NA	NA	NA	NA	NA	NA	NA	NA	F	NA	NA	NA	NA	NA	NA	NA	NA	NA	NA	NA	NA	NA	NA	NA	NA	NA	NA	NA
CGACTTATGAGTGCGTGTCCTGGTTCGTAAG	9	TGACACGGCTTACGAACCAGGACACGCACTCATAAGTCG	39	0.0403281563194602	52.001304	1.492667	-5.122584	F	NA	NA	NA	NA	NA	NA	NA	NA	NA	NA	NA	NA	NA	NA	NA	NA	NA	NA	F	NA	NA	NA	NA	NA	NA	NA	NA	NA	NA	NA	NA	NA	NA	NA	NA	NA	NA	NA
AAGAGTAACGGAGGAGCACGAAGGTTAGCTA	8	CCTAAAGAGTAACGGAGGAGCACGAAGGTTAGCTAATC	38	0.0398817638838437	2.179565	11.578667	2.409357	F	NA	NA	NA	NA	NA	NA	NA	NA	NA	NA	NA	NA	NA	NA	NA	NA	NA	NA	F	NA	NA	NA	NA	NA	NA	NA	NA	NA	NA	NA	NA	NA	NA	NA	NA	NA	NA	NA
ACATTGACGCTCGGGTATCCCCCAACATTAT	36	GTGCCGGGGACCATGACGGCCATGCCGTTCTTCATAATGTTGGGGGATACCCGAGCGTCAATGTGG	66	0.0174555956975641	43.985217	1	-5.458947	F	NA	NA	NA	NA	NA	NA	NA	NA	NA	NA	NA	NA	NA	NA	NA	NA	NA	NA	F	NA	NA	NA	NA	NA	NA	NA	NA	NA	NA	NA	NA	NA	NA	NA	NA	NA	NA	NA
CGAATCACAGCAATTTCATTTGCGGCATTCG	16	CGAATGCCGCAAATGAAATTGCTGTGATTCGACGAAGTGGTTGGCC	46	0.0421112517742481	31.302174	3.012	-3.377469	F	NA	NA	NA	NA	NA	NA	NA	NA	NA	NA	NA	NA	NA	NA	NA	NA	NA	NA	F	NA	NA	NA	NA	NA	NA	NA	NA	NA	NA	NA	NA	NA	NA	NA	NA	NA	NA	NA
GGAATTGGCCCTCTCTCAGCATGGCGCGGCC	4	GGAATTGGCCCTCTCTCAGCATGGCGCGGCCGGC	34	0.0489740719044616	1	5.424333	2.439446	T	18765	chr20	60664306	60664324	NA	19M15S	0	0	0	1	15	0	T	F	0.558823529411765	0.947368421052632	1	1	F	NA	NA	NA	NA	NA	NA	NA	NA	NA	ENSG00000228340	+	MIR646HG	10523	ENSG00000276627	+	AL117372.1	90676	NA	NA
AGGCTGCTGGTGCCTTCGGCGTTGTCCAGCA	32	TGCTGGACAACGCCGAAGGCACCAGCAGCCTTGAGCGCAGGCTCATCAACGAGGCTCGGATC	62	0.019458302438365	70.662174	1	-6.142866	F	NA	NA	NA	NA	NA	NA	NA	NA	NA	NA	NA	NA	NA	NA	NA	NA	NA	NA	F	NA	NA	NA	NA	NA	NA	NA	NA	NA	NA	NA	NA	NA	NA	NA	NA	NA	NA	NA
ACCAACCACATCCAGAAACGCTTGTCGGCGA	69	CGACATGCGCATCGAGCGCGACGGTGAAAATCATGCGGACATTTCCATCCTAAAGCTTCGCCGACAAGCGTTTCTGGATGTGGTTGGTGACCGCACGCC	99	0.00813605426283561	16.441304	1	-4.039253	F	NA	NA	NA	NA	NA	NA	NA	NA	NA	NA	NA	NA	NA	NA	NA	NA	NA	NA	F	NA	NA	NA	NA	NA	NA	NA	NA	NA	NA	NA	NA	NA	NA	NA	NA	NA	NA	NA
GAACCCCGACCCAGAAGCAGGTCGTCTACGA	24	TCGTAGACGACCTGCTTCTGGGTCGGGGTTCGTACGTAGCAGAGCAGCTCCCTC	54	0.0467628860723642	1.973478	17.041	3.110198	T	16268	chr21	8446114	8446168	NA	28M1D26M	0	1	0	0	0	0	F	F	1	0.981481481481482	1	1	F	NA	ENSG00000280441	FP236383.1	+	lncRNA	NA	NA	NA	NA	NA	NA	NA	NA	NA	NA	NA	NA	F	T
CCTTCAGCGTATATGCGATCAGAGCCAGACC	4	ATCGGTCTGGCTCTGATCGCATATACGCTGAAGG	34	0.0413486735609676	10.531304	1.135667	-3.213072	T	12213	chr13	66074585	66074601	NA	17M17S	0	0	0	2	17	0	T	F	0.5	0.882352941176471	1	2	F	NA	NA	NA	NA	NA	NA	NA	NA	NA	ENSG00000286395	+	AL158038.1	100887	ENSG00000263561	+	MIR4704	143648	NA	NA
AGGCGCGACAGGACTGAAGCGGCACCGCATC	19	AAAGGAGAAGGCGCGACAGGACTGAAGCGGCACCGCATCATCGCAGGCAAAAACA	55	0.0255533400045377	1	7.605333	2.927011	F	NA	NA	NA	NA	NA	NA	NA	NA	NA	NA	NA	NA	NA	NA	NA	NA	NA	NA	F	NA	NA	NA	NA	NA	NA	NA	NA	NA	NA	NA	NA	NA	NA	NA	NA	NA	NA	NA
CCGAAGTTGTGCCGCCGACCGTGATCGTGAC	32	CGTGCCGTCACGATCACGGTCGGCGGCACAACTTCGGGATATTCAGAAACCGGCAGGTTGGG	62	0.00268720918510221	1	11.680333	3.54601	F	NA	NA	NA	NA	NA	NA	NA	NA	NA	NA	NA	NA	NA	NA	NA	NA	NA	NA	F	NA	NA	NA	NA	NA	NA	NA	NA	NA	NA	NA	NA	NA	NA	NA	NA	NA	NA	NA
ACGCTGCCGATGAAAAGCTGAGGCTGGTCGA	4	CAACGCTGCCGATGAAAAGCTGAGGCTGGTCGAG	34	0.0290224983098776	24.855217	1.055667	-4.557322	F	NA	NA	NA	NA	NA	NA	NA	NA	NA	NA	NA	NA	NA	NA	NA	NA	NA	NA	F	NA	NA	NA	NA	NA	NA	NA	NA	NA	NA	NA	NA	NA	NA	NA	NA	NA	NA	NA
CGCGGAGTCCTCCGCCGCCCGCGCCATGAAG	103	AAAGCCCCTGCCCCTACATCACTGGGTAAACTTCATGGCGCGGGCGGCGGAGGACTCCGCGGCGATCCGGTCAAGGTTTGCCTGGTTGGCGGCAGCCGCCGCATTGTTCACGACACCGTTCAGCTCGTTGACGG	134	0	10.12	1.589	-2.671018	F	NA	NA	NA	NA	NA	NA	NA	NA	NA	NA	NA	NA	NA	NA	NA	NA	NA	NA	F	NA	NA	NA	NA	NA	NA	NA	NA	NA	NA	NA	NA	NA	NA	NA	NA	NA	NA	NA
CAAAAGCAGGTAGAGCGGAGCCAGATTTTTC	4	AGCAAAAGCAGGTAGAGCGGAGCCAGATTTTTCCA	35	0.0195418635070771	21.867826	2.044667	-3.418872	T	8491	chr1	216564607	216564624	NA	17S18M	0	0	0	0	0	17	F	T	0.514285714285714	1	1	0	F	NA	ENSG00000196482	ESRRG	-	protein_coding	NA	NA	NA	NA	NA	NA	NA	NA	NA	NA	NA	NA	F	T
CCTACCCTCTTCCCCTCCCCGCCCCTCTCCC	3	CCTACCCTCTTCCCCTCCCCGCCCCTCTCCCGA	33	0.0437306866598014	174.113913	1.153667	-7.237661	T	11705	chr7	101154694	101154715	NA	22M11S	0	0	0	0	11	0	T	F	0.666666666666667	1	1	0	F	NA	ENSG00000106367	AP1S1	+	protein_coding	NA	NA	NA	NA	NA	NA	NA	NA	NA	NA	NA	NA	F	T
CCCCCTCCCCTCCCCTCTTCCCCTACCCGCC	1	CCCCCTCCCCTCCCCTCTTCCCCTACCCGCC	31	0.0428552673163454	168.792174	1	-7.399104	T	10564	chr11	26600469	26600499	NA	31M	0	0	0	3	0	0	F	F	1	0.903225806451613	1	3	F	NA	ENSG00000134343	ANO3	+	protein_coding	NA	NA	NA	NA	NA	NA	NA	NA	NA	NA	NA	NA	F	T
CCCGGTCGCGGCCATCGCGCGCTGGCGTCGC	3	GCCCGGTCGCGGCCATCGCGCGCTGGCGTCGCT	33	0.0394677986611323	5.41	1	-2.435629	T	10746	chr19	40554208	40554223	NA	17S16M	0	0	0	0	0	17	F	T	0.484848484848485	1	1	0	F	NA	ENSG00000160460	SPTBN4	+	protein_coding	NA	NA	NA	NA	NA	NA	NA	NA	NA	NA	NA	NA	T	F
CGCTGCGCTGAAATCTATATGGCGTGGAAAC	32	GCGTGATCTAGCACGCTGCGCTGAAATCTATATGGCGTGGAAACAGAACCCGCGCAATCCGTGCGGG	67	0.00388660348319158	42.482609	2.173667	-4.28867	F	NA	NA	NA	NA	NA	NA	NA	NA	NA	NA	NA	NA	NA	NA	NA	NA	NA	NA	F	NA	NA	NA	NA	NA	NA	NA	NA	NA	NA	NA	NA	NA	NA	NA	NA	NA	NA	NA
ATCGGCGATCTGGTGTCGTTTTCCGACTCCG	4	GATCGGCGATCTGGTGTCGTTTTCCGACTCCGAC	34	0.0457672112535275	14.798261	1	-3.887356	F	NA	NA	NA	NA	NA	NA	NA	NA	NA	NA	NA	NA	NA	NA	NA	NA	NA	NA	F	NA	NA	NA	NA	NA	NA	NA	NA	NA	NA	NA	NA	NA	NA	NA	NA	NA	NA	NA
GGCAGAGCCACGAACGCATCCGAGCGCTCGA	33	GGCAGAGCCACGAACGCATCCGAGCGCTCGAACATCAGTCGCTTGCGCTCATGCATGTCGGGG	63	0.0103823110213503	15.194783	1.339333	-3.503989	F	NA	NA	NA	NA	NA	NA	NA	NA	NA	NA	NA	NA	NA	NA	NA	NA	NA	NA	F	NA	NA	NA	NA	NA	NA	NA	NA	NA	NA	NA	NA	NA	NA	NA	NA	NA	NA	NA
GCCCGTCACCCACCGCACGTTCGTGGGGAAC	19	GCGGAAAGGCGGCCGCCCCCTCGCCCGTCACCCACCGCACGTTCGTGGGGAACCTGGCG	59	0.00955588926508664	1.606522	18.607667	3.533885	T	17629	chr9	76571870	76571928	NA	59M	0	0	0	3	0	0	F	F	1	0.949152542372881	2	3	F	NA	ENSG00000187210	GCNT1	+	protein_coding	NA	NA	NA	NA	NA	NA	NA	NA	NA	NA	NA	NA	F	T
CGATCGCGCGCCAAGGACTACGACGACAAGC	6	GCCCGATCGCGCGCCAAGGACTACGACGACAAGCGC	36	0.0476001402444741	25.743913	1.749667	-3.879079	F	NA	NA	NA	NA	NA	NA	NA	NA	NA	NA	NA	NA	NA	NA	NA	NA	NA	NA	F	NA	NA	NA	NA	NA	NA	NA	NA	NA	NA	NA	NA	NA	NA	NA	NA	NA	NA	NA
GCGCCACTGAGCCAAGATCGCGCCACTGCAC	1	GCGCCACTGAGCCAAGATCGCGCCACTGCAC	31	0.0491207165157409	2.05	8.177	1.995948	T	18517	chr1	26095910	26095936	NA	4S27M	0	0	0	0	0	4	F	T	0.870967741935484	1	21	0	F	NA	NA	NA	NA	NA	NA	NA	NA	NA	ENSG00000158022	-	TRIM63	27475	ENSG00000175087	+	PDIK1L	15228	NA	NA
ATACCAAAGTACCCAAAGTATATATTATGTA	9	AAATACCAAAGTACCCAAAGTATATATTATGTACCGTAC	39	0.0144238616121472	70.485217	1	-6.139249	T	6379	KI270467.1	3778	3816	NA	39M	0	0	0	1	0	0	F	F	1	0.974358974358974	1	1	F	NA	NA	NA	NA	NA	NA	NA	NA	NA	NA	NA	NA	NA	NA	NA	NA	NA	NA	NA
CGGCGCCTCATGCCGCCACCAGGATCGGGCA	17	CCGCACGCCGCCGCCGTGCCCGATCCTGGTGGCGGCATGAGGCGCCG	47	0.0403079248034491	1	4.588	2.197865	F	NA	NA	NA	NA	NA	NA	NA	NA	NA	NA	NA	NA	NA	NA	NA	NA	NA	NA	F	NA	NA	NA	NA	NA	NA	NA	NA	NA	NA	NA	NA	NA	NA	NA	NA	NA	NA	NA
CATCACATTGCGAATCGGCCGCAGCACCGGC	3	CGGCATCACATTGCGAATCGGCCGCAGCACCGGC	34	0.0256419728747536	21.312174	1	-4.413606	F	NA	NA	NA	NA	NA	NA	NA	NA	NA	NA	NA	NA	NA	NA	NA	NA	NA	NA	F	NA	NA	NA	NA	NA	NA	NA	NA	NA	NA	NA	NA	NA	NA	NA	NA	NA	NA	NA
CGAGCGCCTCGGTTGGAATCGCTTTGGCGGC	14	CAGACGAGCCGCCAAAGCGATTCCAACCGAGGCGCTCGCCGACGA	45	0.0213839785343965	27.678696	2.168667	-3.673896	F	NA	NA	NA	NA	NA	NA	NA	NA	NA	NA	NA	NA	NA	NA	NA	NA	NA	NA	F	NA	NA	NA	NA	NA	NA	NA	NA	NA	NA	NA	NA	NA	NA	NA	NA	NA	NA	NA
AGTCGCGCGGCATGTAGAGCGAGGAATCGCG	15	GCGAGATGTCGAAGTCGCGCGGCATGTAGAGCGAGGAATCGCGGATAT	48	0.011814778886223	23.415217	1.209333	-4.275163	F	NA	NA	NA	NA	NA	NA	NA	NA	NA	NA	NA	NA	NA	NA	NA	NA	NA	NA	F	NA	NA	NA	NA	NA	NA	NA	NA	NA	NA	NA	NA	NA	NA	NA	NA	NA	NA	NA
ATATTCTATTCATTCTATTCTAGAGTATGTA	45	TGAATACATACTCTAGAATAGAATGAATAGAATATGTTATGAATAGAGAAGGGAGAAGATATGAAAGGATATAGA	75	0.0324397544774605	74.374348	1	-6.216733	F	NA	NA	NA	NA	NA	NA	NA	NA	NA	NA	NA	NA	NA	NA	NA	NA	NA	NA	F	NA	NA	NA	NA	NA	NA	NA	NA	NA	NA	NA	NA	NA	NA	NA	NA	NA	NA	NA
CCTTGCCCTGCTACTGTCCATCGGCTTGTGC	24	GAAAACCTTGCCCTGCTACTGTCCATCGGCTTGTGCATCGGCCTGGCAAAACGTGAC	57	0.0295101092894186	49.957391	1	-5.642626	F	NA	NA	NA	NA	NA	NA	NA	NA	NA	NA	NA	NA	NA	NA	NA	NA	NA	NA	F	NA	NA	NA	NA	NA	NA	NA	NA	NA	NA	NA	NA	NA	NA	NA	NA	NA	NA	NA
CCGCTCACTGAGCTTGATTCCCAGTCCGCAC	3	CCCGCTCACTGAGCTTGATTCCCAGTCCGCACG	33	0.0259439272229378	16.512609	4.405	-1.906354	T	11243	chr8	99807502	99807519	NA	8S18M7S	0	0	0	0	7	8	T	T	0.545454545454545	1	1	0	F	NA	ENSG00000132549	VPS13B	+	protein_coding	NA	NA	NA	NA	NA	NA	NA	NA	NA	NA	NA	NA	F	T
ATTCCATTCCCCTGTACTCGTGTTGATTCCA	19	GAATGGAATGGAATCAACACGAGTACAGGGGAATGGAATGGAATGGAAT	49	0	167.061739	1.068	-7.289326	T	8340	chr10	41860276	41860324	NA	49M	0	0	0	3	0	0	F	F	1	0.938775510204082	2	3	F	NA	NA	NA	NA	NA	NA	NA	NA	NA	ENSG00000233832	+	AL590623.1	3077169	ENSG00000229485	-	KSR1P1	288985	NA	NA
ATGCCGCGCTGATCGCGGCCGGCGGCTGCCC	9	CGGGCAGCCGCCGGCCGCGATCAGCGCGGCATAGCGCGCGGTCTT	45	0.0421112517742481	1	7.539667	2.914501	F	NA	NA	NA	NA	NA	NA	NA	NA	NA	NA	NA	NA	NA	NA	NA	NA	NA	NA	F	NA	NA	NA	NA	NA	NA	NA	NA	NA	NA	NA	NA	NA	NA	NA	NA	NA	NA	NA
CTCGGCATCGAACTATTGGTCGCGGCGCAAG	28	CCTTGCGCCGCGACCAATAGTTCGATGCCGAGGATGGCAGCGAGATTATCCACCATGT	58	0.0451702990122836	1	5.861	2.551147	F	NA	NA	NA	NA	NA	NA	NA	NA	NA	NA	NA	NA	NA	NA	NA	NA	NA	NA	F	NA	NA	NA	NA	NA	NA	NA	NA	NA	NA	NA	NA	NA	NA	NA	NA	NA	NA	NA
AGGTCGGTGACGAGCACGGCATCAAGCTCGA	5	AACAAGGTCGGTGACGAGCACGGCATCAAGCTCGA	35	0.032579345210997	25.735217	2.055667	-3.646065	F	NA	NA	NA	NA	NA	NA	NA	NA	NA	NA	NA	NA	NA	NA	NA	NA	NA	NA	F	NA	NA	NA	NA	NA	NA	NA	NA	NA	NA	NA	NA	NA	NA	NA	NA	NA	NA	NA
CCTTTTGGCCCACGACCATGCAATCCCGCGC	13	CCTTTTGGCCCACGACCATGCAATCCCGCGCGGGGTGGATCAA	43	0.0402579965929892	1.29913	5.868333	2.175405	F	NA	NA	NA	NA	NA	NA	NA	NA	NA	NA	NA	NA	NA	NA	NA	NA	NA	NA	F	NA	NA	NA	NA	NA	NA	NA	NA	NA	NA	NA	NA	NA	NA	NA	NA	NA	NA	NA
AGTGAAGTCAAACGGGCACTTGATCGCCCTG	8	GCGCTGCCAGGGCGATCAAGTGCCCGTTTGACTTCACT	38	0.0421698646628475	27.495217	1.182	-4.539879	F	NA	NA	NA	NA	NA	NA	NA	NA	NA	NA	NA	NA	NA	NA	NA	NA	NA	NA	F	NA	NA	NA	NA	NA	NA	NA	NA	NA	NA	NA	NA	NA	NA	NA	NA	NA	NA	NA
CCTGCAGATGATCGCTGGCTTCCTCGACCCG	49	ATCTCTTTCCTCGGCCCCTCCGGCTGCGGCAAGACCACGACCCTGCAGATGATCGCTGGCTTCCTCGACCCGACGCGCG	79	0.0112964541381904	1	8.385333	3.067868	F	NA	NA	NA	NA	NA	NA	NA	NA	NA	NA	NA	NA	NA	NA	NA	NA	NA	NA	F	NA	NA	NA	NA	NA	NA	NA	NA	NA	NA	NA	NA	NA	NA	NA	NA	NA	NA	NA
ACCGCATCGGTGTCAATCGAAGCCGCCGCAT	6	CGCCGACCGCATCGGTGTCAATCGAAGCCGCCGCAT	36	0.0256857758195945	41.488696	2.061333	-4.331069	F	NA	NA	NA	NA	NA	NA	NA	NA	NA	NA	NA	NA	NA	NA	NA	NA	NA	NA	F	NA	NA	NA	NA	NA	NA	NA	NA	NA	NA	NA	NA	NA	NA	NA	NA	NA	NA	NA
[truncated: 13,421 more rows]
